# Supplementary material
Source: publisher figshare collection journal article supplement (https://gsajournals.figshare.com/articles/dataset/_/24058836)
Supplement: Supplementary file 1 [file 1]

## Sheet: LB_M.W_DES_pv0.05_FC0.5
GeneID	logFC	logCPM	F	PValue	FDR	Chr	start	end	strand	function.	name
FBgn0036227	11.9944	6.59657	5.53522	0.0424713	0.43234	chr3L	11949838	11952225	+	protein_coding	CG17826
FBgn0051439	10.5134	8.55687	5.61407	0.0413142	0.427734	chr3R	25397787	25400645	-	protein_coding	Muc96D
FBgn0040950	9.36384	5.72215	5.47473	0.0433865	0.433347	chr2L	6151968	6153701	+	protein_coding	Muc26B
FBgn0033395	8.33902	5.59756	406.323	3.68e-11	6.47e-07	chr2R	9237511	9239831	+	protein_coding	Cyp4p2
FBgn0038717	7.53882	-1.1049	11.3484	0.00789469	0.239418	chr3R	19607253	19609322	+	protein_coding	CG17751
FBgn0039311	7.41664	-1.22601	6.93709	0.0285337	0.374516	chr3R	25275789	25277212	-	protein_coding	CG10513
FBgn0266935	7.17609	0.65587	89.8196	2.27e-07	0.000798381	chr3L	19090582	19090975	+	lincRNA	CR45386
FBgn0040653	7.1694	-0.292158	8.84659	0.0167784	0.307884	chr2R	20868495	20869321	-	protein_coding	IM4
FBgn0038718	6.60333	0.0713111	5.65993	0.0476715	0.450034	chr3R	19610224	19612437	+	protein_coding	CG17752
FBgn0003961	6.22104	-0.172331	8.86189	0.0123077	0.2746	chr2L	7780084	7781415	+	protein_coding	Uro
FBgn0037724	5.89652	2.98392	6.17755	0.0335338	0.398629	chr3R	9644977	9646154	-	protein_coding	Fst
FBgn0263321	5.81297	1.83456	20.3231	0.000840384	0.117113	chr2L	1442626	1443832	+	protein_coding	CG43402
FBgn0003356	5.62908	-0.282782	11.2644	0.00570639	0.213188	chr3R	29923753	29924615	-	protein_coding	Jon99Cii
FBgn0261289	5.61648	-1.81349	11.9929	0.00557826	0.212749	chr3R	28806701	28807501	+	protein_coding	CheB98a
FBgn0262142	5.5889	-2.42302	8.66648	0.0138234	0.286919	chr2R	22666358	22666764	+	lincRNA	CR42868
FBgn0053128	5.5505	-0.823897	6.48778	0.0263456	0.364852	chr2L	1494069	1495456	+	protein_coding	CG33128
FBgn0001285	5.49112	-2.44645	11.3768	0.00652198	0.220882	chr2R	8691447	8692844	+	protein_coding	Jon44E
FBgn0035343	5.41724	1.41518	6.33318	0.0304735	0.380525	chr3L	2474666	2475614	-	protein_coding	CG16762
FBgn0034331	5.35275	-0.0445356	10.0375	0.008274	0.240925	chr2R	18384823	18385589	-	protein_coding	CG15067
FBgn0036013	5.14578	-2.32492	12.8706	0.00450046	0.19698	chr3L	9597853	9598195	+	protein_coding	CG14177
FBgn0038436	5.13437	-2.19842	17.1362	0.00177117	0.139193	chr3R	16477109	16481070	+	protein_coding	Gyc-89Db
FBgn0039760	5.09277	-0.419845	8.27584	0.0141056	0.287693	chr3R	30250927	30252830	+	protein_coding	CG9682
FBgn0028561	5.06169	-2.10904	10.8797	0.0074251	0.233917	chr2R	8089481	8091297	+	protein_coding	sut3
FBgn0040736	5.05377	1.66342	8.72183	0.0139219	0.286919	chr2R	18387894	18388734	+	protein_coding	IM3
FBgn0266088	4.96475	-2.07127	17.1631	0.00176169	0.139193	chr2R	24955776	24957359	-	lincRNA	CR44830
FBgn0039106	4.94494	-2.70151	9.76308	0.0100628	0.256575	chr3R	23710157	23711338	+	protein_coding	CG10301
FBgn0032049	4.94175	-1.10043	6.54162	0.0248385	0.357785	chr2L	8494892	8496307	-	protein_coding	Bace
FBgn0053801	4.82467	-2.47334	7.00176	0.0233571	0.349342	chr2L	21416952	21417975	+	protein_coding	His1:CG33801
FBgn0026395	4.75474	-2.5173	5.4397	0.0404795	0.424853	chr2L	2654048	2655462	+	protein_coding	Or23a
FBgn0085789	4.75318	-2.4694	7.72646	0.0184609	0.319172	chrY	3047605	3048886	+	pseudogene	CR41506
FBgn0267012	4.74315	-2.77709	8.94858	0.0127144	0.277678	chr2L	9325844	9326721	+	lincRNA	CR45456
FBgn0067905	4.73392	-2.44189	5.46066	0.0401641	0.424117	chr2R	20870391	20870678	+	protein_coding	IM14
FBgn0031409	4.73114	-2.7792	12.1541	0.00535895	0.210206	chr2L	2285162	2285926	+	protein_coding	CG4271
FBgn0032144	4.65784	-2.84988	6.83893	0.0321798	0.390764	chr2L	9769059	9770409	+	protein_coding	CG17633
FBgn0051080	4.61576	-2.85679	5.43914	0.0495343	0.456585	chr3R	26633731	26634714	+	protein_coding	TwdlH
FBgn0029963	4.61197	-2.85743	5.8277	0.043709	0.434591	chrX	7852480	7854244	-	protein_coding	CG10920
FBgn0038153	4.60471	-2.70693	11.2307	0.00677306	0.222411	chr3R	13420278	13423140	+	protein_coding	Ir87a
FBgn0033074	4.57635	2.76438	121.263	3.67e-08	0.000161269	chr2R	6225633	6226884	+	protein_coding	tomboy40
FBgn0266965	4.49575	-2.81804	8.44765	0.0147644	0.292275	chr3L	6883320	6883601	-	lincRNA	CR45416
FBgn0260718	4.47819	-2.90062	7.18137	0.0291755	0.376899	chr2L	21577204	21577676	-	pseudogene	CR42545
FBgn0034205	4.47779	-2.70214	8.35715	0.0151759	0.295564	chr2R	17195202	17197159	+	protein_coding	CG10950
FBgn0259223	4.47674	-2.78011	7.69035	0.0186736	0.320831	chrX	18422412	18427001	+	protein_coding	CG42323
FBgn0035928	4.46362	-2.86447	7.68693	0.0186939	0.320866	chr3L	8798729	8800532	-	protein_coding	CG13310
FBgn0040735	4.45317	-0.405106	12.3188	0.00382923	0.182692	chr2R	18388994	18389443	+	protein_coding	CG16836
FBgn0263461	4.45204	-2.61886	5.67119	0.0371572	0.411349	chr3L	891249	891475	+	snoRNA	snoRNA:CG32479-a
FBgn0052119	4.42284	1.01124	55.0543	3.83e-06	0.00747029	chr3L	13246863	13248702	-	protein_coding	CG32119
FBgn0013772	4.40741	-1.692	7.99816	0.0137126	0.28671	chr2R	14887170	14889010	-	protein_coding	Cyp6a8
FBgn0039042	4.37228	-1.8386	5.41814	0.0360487	0.406211	chr3R	23043989	23044661	+	protein_coding	CG13837
FBgn0031653	4.36756	-2.12473	7.96088	0.0138902	0.286919	chr2L	4949940	4950767	-	protein_coding	Jon25Biii
FBgn0085456	4.35089	-2.89986	7.25247	0.0215037	0.338944	chr3L	8804763	8805812	+	protein_coding	CG34427
FBgn0266087	4.34597	-2.78162	6.57519	0.0269745	0.366598	chr2R	24859259	24860177	+	lincRNA	CR44829
FBgn0033041	4.34405	-2.8568	5.89234	0.0342877	0.400353	chr2R	5791440	5792967	-	protein_coding	Or42a
FBgn0266160	4.33915	-2.82433	5.74156	0.0362136	0.40709	chr2L	15748000	15748324	+	lincRNA	CR44866
FBgn0051784	4.32119	-2.90273	7.17211	0.0220778	0.342287	chr2L	17123306	17125961	-	protein_coding	CG31784
FBgn0261453	4.31928	-2.90446	6.18725	0.0308672	0.382099	chr3R	7921951	7922073	+	snoRNA	scaRNA:MeU2-C41
FBgn0036162	4.30813	-1.19366	12.1943	0.00372742	0.18233	chr3L	11463569	11465864	-	protein_coding	CG6140
FBgn0035315	4.215	-2.94342	7.11239	0.0225165	0.342626	chr3L	2197012	2198089	+	protein_coding	CG8960
FBgn0038845	4.20985	-2.54039	6.56851	0.0270362	0.36687	chr3R	21005159	21006990	-	protein_coding	CG10827
FBgn0051233	4.2077	-2.98537	6.83265	0.0322385	0.391207	chr3R	21749852	21753237	+	protein_coding	CG31233
FBgn0034263	4.20396	-2.89699	5.10839	0.0458864	0.443629	chr2R	17722338	17723381	+	protein_coding	CG10934
FBgn0050378	4.19272	-2.78056	7.59501	0.0192496	0.323759	chr2R	7950338	7951492	+	protein_coding	CG30378
FBgn0030296	4.19272	-2.77867	6.21933	0.0305206	0.380525	chrX	11409946	11411667	+	protein_coding	CG15196
FBgn0053483	4.18907	-2.60152	6.39556	0.0286982	0.374906	chr3R	30900717	30902161	-	protein_coding	CG33483
FBgn0015037	4.18753	3.99257	141.615	1.4e-08	0.000123072	chr2R	9240040	9242139	+	protein_coding	Cyp4p1
FBgn0262900	4.17947	-2.94404	5.33021	0.042176	0.431064	chrX	8923959	8924449	+	protein_coding	CG43255
FBgn0037514	4.17923	-2.70488	5.12939	0.0455187	0.442314	chr3R	7758121	7759677	+	protein_coding	CG10919
FBgn0266815	4.17799	-2.90385	5.76251	0.0359383	0.406075	chr2R	14433429	14433895	-	lincRNA	CR45277
FBgn0262028	4.17652	-2.79632	6.3302	0.0293583	0.376899	chr3R	16004320	16008073	-	lincRNA	CR42839
FBgn0037862	4.16918	-2.75143	6.12878	0.0315112	0.385311	chr3R	11137176	11139742	+	protein_coding	CG4706
FBgn0039778	4.16424	-1.82577	6.91992	0.0201235	0.328697	chr3R	30488962	30489895	+	protein_coding	Jon99Fi
FBgn0265694	4.15774	-2.87212	5.77034	0.0358361	0.406075	chrX	7555777	7557844	+	lincRNA	CR44501
FBgn0038914	4.1135	-1.47552	19.1273	0.000677329	0.107146	chr3R	21883923	21884454	-	protein_coding	fit
FBgn0039596	4.01258	-2.7586	7.16614	0.0221212	0.342287	chr3R	28748383	28751661	-	protein_coding	CG10000
FBgn0262180	4.01132	-2.78583	7.01344	0.0232666	0.349091	chr3R	9517523	9517599	+	pre_miRNA	mir-2283
FBgn0050393	3.99748	-2.90412	6.15185	0.0312552	0.38513	chr2R	21266363	21267579	-	protein_coding	CG30393
FBgn0034671	3.99655	-2.95224	5.62102	0.0378482	0.415755	chr2R	21954241	21954845	-	protein_coding	CG13494
FBgn0034291	3.98902	-2.21255	5.22873	0.0387833	0.420368	chr2R	18044045	18045073	-	protein_coding	CG5770
FBgn0039469	3.9814	-2.99323	6.2568	0.0301217	0.380235	chr3R	26994831	26996442	+	protein_coding	TwdlC
FBgn0266763	3.9742	-1.40337	17.244	0.00103233	0.125894	chr2R	10946308	10947095	+	lincRNA	CR45228
FBgn0085280	3.91076	2.12377	5.56686	0.0397743	0.422972	chr3L	17671621	17683581	+	protein_coding	CG34251
FBgn0053281	3.8335	-1.13952	5.46387	0.0367446	0.409843	chr2L	3324236	3326637	+	protein_coding	CG33281
FBgn0032563	3.82344	-2.51104	5.94084	0.0336948	0.398684	chr2L	15360920	15361627	-	protein_coding	CG15258
FBgn0039325	3.81842	-1.53801	9.59191	0.00809802	0.239629	chr3R	25318549	25320101	-	protein_coding	CG10560
FBgn0037786	3.8097	-3.03436	4.99657	0.0479074	0.451196	chr3R	10073820	10075373	-	protein_coding	CG5361
FBgn0031010	3.80645	-2.41841	8.79734	0.0104716	0.259338	chrX	19277175	19280349	-	protein_coding	CG8028
FBgn0052072	3.79238	-2.14795	7.92799	0.0140491	0.287282	chr3L	11101874	11103030	-	protein_coding	Elo68alpha
FBgn0067311	3.79206	-2.86506	5.25673	0.0433633	0.433347	chr2L	20816455	20817270	-	protein_coding	CheB38b
FBgn0266962	3.77372	-2.99613	4.89796	0.0497803	0.456585	chr3L	6931022	6931950	-	protein_coding	CG45413
FBgn0261292	3.71113	0.854537	32.915	5.72e-05	0.035848	chr2R	16466708	16467522	+	protein_coding	CheB53a
FBgn0053110	3.64593	-2.29245	6.84899	0.0206558	0.332634	chr3R	22570187	22580392	+	protein_coding	CG33110
FBgn0025837	3.64163	-1.11939	5.57216	0.0349202	0.402373	chrX	124369	126714	-	protein_coding	CG17636
FBgn0037772	3.59721	-0.142689	14.1789	0.00218328	0.151983	chr3R	9997162	10000314	+	protein_coding	Spn85F
FBgn0028963	3.59443	-1.1026	12.1734	0.00374933	0.18233	chr2R	12842664	12844704	+	protein_coding	Or49b
FBgn0034666	3.57326	-2.99552	6.18963	0.0308413	0.382099	chr2R	21860824	21861994	+	protein_coding	CG9294
FBgn0267088	3.56903	-2.75897	5.76838	0.0358616	0.406075	chrX	7120373	7120741	-	lincRNA	CR45532
FBgn0032913	3.55136	-0.546258	8.65794	0.0113764	0.269281	chr2L	21089374	21090999	+	protein_coding	CG9259
FBgn0038008	3.54449	-2.75249	5.59233	0.0382505	0.417478	chr3R	12254186	12256592	+	protein_coding	CG3942
FBgn0083038	3.54225	-2.76223	6.97807	0.023542	0.3504	chr2L	20418347	20418481	+	snoRNA	snoRNA:Psi18S-525a
FBgn0264350	3.54197	-3.08569	5.3769	0.0414422	0.428302	chr2L	16178317	16179188	-	lincRNA	CR43806
FBgn0003357	3.50676	-0.66626	6.37199	0.0316003	0.385594	chr3R	29922215	29923455	+	protein_coding	Jon99Ciii
FBgn0033820	3.4984	2.66485	7.2392	0.0222621	0.342287	chr2R	13256586	13257446	+	protein_coding	CG4716
FBgn0037818	3.45867	-1.30361	14.3551	0.00208628	0.148923	chr3R	10675559	10677251	-	protein_coding	CG6465
FBgn0261293	3.39948	-1.99601	6.28006	0.0255742	0.360689	chr2R	16468208	16468934	+	protein_coding	CheB53b
FBgn0030332	3.34466	5.02552	53.4248	1.16e-05	0.012769	chrX	11763473	11764590	-	protein_coding	CG9360
FBgn0033997	3.34059	0.694881	32.4264	6.15e-05	0.0372605	chr2R	15204653	15206334	+	pseudogene	Ir51a
FBgn0261534	3.31692	-2.53135	4.83207	0.0457571	0.443405	chr2L	14349019	14351513	-	protein_coding	l(2)34Fc
FBgn0016974	3.30813	-1.24999	17.1626	0.00105196	0.125894	chrX	6361495	6363310	-	pseudogene	swaPsi
FBgn0031367	3.30241	-2.05443	10.3763	0.00634514	0.220882	chr2L	1831626	1832565	-	protein_coding	c-cup
FBgn0038579	3.3016	-2.49893	6.08611	0.0275553	0.370194	chr3R	18191243	18191967	-	protein_coding	CG14313
FBgn0262567	3.27212	-3.08991	5.06967	0.0465743	0.445667	chr2R	17140494	17140865	-	protein_coding	CG43107
FBgn0267038	3.25911	-3.13864	4.98744	0.0480772	0.451196	chrX	4047595	4049204	-	lincRNA	CR45482
FBgn0039621	3.25409	-3.09363	5.16994	0.0448185	0.438881	chr3R	29024970	29026159	+	protein_coding	CG14518
FBgn0263235	3.25127	-0.652255	5.61949	0.0342784	0.400353	chr2L	12111109	12112256	+	protein_coding	Phae2
FBgn0031935	3.22553	-1.53274	5.73719	0.0315906	0.385594	chr2L	7716973	7719487	-	protein_coding	CG13793
FBgn0264909	3.20863	-2.56147	6.18909	0.026482	0.365277	chr2R	4507994	4508445	+	lincRNA	CR44100
FBgn0015035	3.16301	-0.651236	8.52455	0.0114662	0.269561	chr2L	9747838	9750071	-	protein_coding	Cyp4e3
FBgn0036348	3.13397	-2.62702	6.40479	0.0243881	0.357006	chr3L	13349164	13354940	+	protein_coding	CG17687
FBgn0035621	3.12628	-2.47725	4.85594	0.0452977	0.441144	chr3L	5598556	5599692	-	protein_coding	CG10591
FBgn0267770	3.12605	-2.7339	5.12005	0.0405613	0.424887	chr3R	25657392	25658274	+	lincRNA	CR46101
FBgn0029639	3.10747	-1.56171	4.94814	0.0435736	0.433981	chrX	2885185	2885914	-	protein_coding	CG14419
FBgn0033397	3.09917	0.323244	16.4181	0.00125285	0.130171	chr2R	9242319	9244410	+	protein_coding	Cyp4p3
FBgn0010038	3.09545	1.63422	7.20956	0.0208677	0.333713	chr3R	12371970	12372704	+	protein_coding	GstD2
FBgn0032669	3.09523	-0.476218	6.19772	0.0273288	0.368844	chr2L	18154850	18155942	+	protein_coding	CG15155
FBgn0032981	3.05487	-0.706989	10.4923	0.00612528	0.218162	chr2L	22175414	22183991	+	protein_coding	CG3635
FBgn0040360	3.04581	-1.82895	6.15153	0.0268676	0.366322	chrX	1184777	1188585	+	protein_coding	CG14626
FBgn0030384	3.04202	-1.77005	8.15295	0.0130028	0.280487	chrX	12373117	12374448	+	protein_coding	CG2577
FBgn0037485	3.00877	-0.756541	4.80353	0.0477852	0.450866	chr3R	7214338	7217083	-	protein_coding	CG14606
FBgn0026176	2.99675	1.72133	73.144	7.62e-07	0.00223108	chr2R	12139294	12140229	-	protein_coding	SkpB
FBgn0267763	2.96525	-2.16612	6.24542	0.0259155	0.362689	chr3R	24573769	24574304	+	lincRNA	CR46094
FBgn0031533	2.9038	-2.37189	8.08588	0.013305	0.284212	chr2L	3445991	3447589	+	protein_coding	CG2772
FBgn0052601	2.89382	-2.029	9.30808	0.00886617	0.249172	chrX	14378805	14379826	+	protein_coding	betaNACtes3
FBgn0035886	2.84955	-1.00474	5.54829	0.0341539	0.400353	chr3L	8391539	8392377	+	protein_coding	Jon66Ci
FBgn0051669	2.84727	-2.26528	5.05278	0.0417098	0.429311	chr2L	2013178	2013250	-	tRNA	tRNA:CR31669
FBgn0034844	2.83887	-1.70952	5.97597	0.0287601	0.374906	chr2R	23323658	23326745	+	protein_coding	CG9861
FBgn0260000	2.80863	-1.23202	7.76955	0.0148449	0.292743	chr2L	20263418	20264424	-	protein_coding	CG17570
FBgn0033869	2.79505	-1.08534	13.1613	0.00285654	0.169059	chr2R	13794776	13805231	+	protein_coding	Cpr50Cb
FBgn0086031	2.78822	-1.42065	9.66451	0.0079141	0.239593	chr2L	865365	865493	-	snoRNA	snoRNA:Me28S-U1230
FBgn0033592	2.73006	-0.29729	6.94493	0.0201107	0.328697	chr2R	11239493	11240114	-	protein_coding	CG13215
FBgn0033981	2.69085	-1.1434	5.01253	0.0424154	0.43234	chr2R	14885263	14886947	-	protein_coding	Cyp6a21
FBgn0267281	2.68288	-2.48318	4.70605	0.0482756	0.452029	chr2L	1142868	1143216	+	lincRNA	CR45717
FBgn0032740	2.68018	-2.46775	5.27656	0.0380301	0.416576	chr2L	19022416	19023646	+	protein_coding	CG15172
FBgn0050026	2.66557	0.103557	6.89656	0.0208128	0.333593	chr2R	11408575	11409449	-	protein_coding	CG30026
FBgn0051219	2.626	1.49153	7.33224	0.0191047	0.32349	chr3R	19651017	19652430	+	protein_coding	CG31219
FBgn0031560	2.62544	2.47192	9.18188	0.0109237	0.264664	chr2L	3695031	3695411	-	protein_coding	CG16713
FBgn0051860	2.61412	1.35437	38.4653	2.61e-05	0.0207996	chr2L	12164240	12166704	+	protein_coding	ZnT33D
FBgn0036716	2.59977	-2.15248	5.24205	0.0385718	0.419899	chr3L	17380025	17382728	-	protein_coding	CG13728
FBgn0039930	2.54284	-2.11532	5.82983	0.0304553	0.380525	chr4	1028674	1029361	-	protein_coding	CG11077
FBgn0013773	2.52409	-0.869736	10.0492	0.00701671	0.227071	chr2R	14871365	14873705	+	protein_coding	Cyp6a22
FBgn0040965	2.50477	-1.44725	4.64704	0.0495111	0.456585	chr2L	9983670	9984743	-	lincRNA	CR13130
FBgn0039198	2.5006	-1.11984	9.59428	0.00809193	0.239629	chr3R	24386103	24390339	-	protein_coding	CG5768
FBgn0054045	2.49992	0.16265	9.29217	0.00891167	0.249172	chr2R	19330888	19335188	+	protein_coding	CG34045
FBgn0020376	2.49192	1.61728	9.99129	0.00767779	0.236932	chr2L	4120342	4121627	+	protein_coding	Sr-CIII
FBgn0035311	2.49179	-1.48213	8.87105	0.0102203	0.256728	chr3L	2171643	2172773	-	pseudogene	CR15821
FBgn0037731	2.47624	0.204401	9.19271	0.00920228	0.252255	chr3R	9685759	9687141	+	protein_coding	CG18542
FBgn0051821	2.4753	1.88289	5.63462	0.0363434	0.407544	chr2L	15900934	15902410	-	protein_coding	CG31821
FBgn0036109	2.46256	-1.30774	7.10637	0.0187991	0.321661	chr3L	10891713	10892516	+	protein_coding	Cpr67Fa2
FBgn0052745	2.45841	-0.240789	16.972	0.00109962	0.126316	chrX	6280232	6280752	-	pseudogene	CR32745
FBgn0264343	2.42872	0.102238	9.70427	0.00781543	0.238654	chr2L	7227733	7228641	+	protein_coding	CG43799
FBgn0054002	2.42621	-1.19739	8.8493	0.0102937	0.257263	chr3L	17858473	17860482	+	protein_coding	CG34002
FBgn0264942	2.41843	0.825031	6.02248	0.0297273	0.378379	chrX	8919639	8920467	-	lincRNA	CR44111
FBgn0262820	2.41508	-1.69356	7.7796	0.0147929	0.292493	chr2R	12035920	12037165	-	protein_coding	CG43191
FBgn0051288	2.40191	-0.929073	5.58584	0.033554	0.398629	chr3R	25297959	25299557	-	protein_coding	CG31288
FBgn0040968	2.39905	-0.319722	10.3696	0.00635815	0.220882	chr2L	11842827	11844012	+	protein_coding	CG14933
FBgn0003886	2.38773	5.91168	6.47399	0.0302444	0.380481	chr3R	9731220	9733250	-	protein_coding	alphaTub85E
FBgn0260874	2.37145	2.6307	55.8459	3.54e-06	0.00747029	chr3L	19799277	19803427	+	protein_coding	Ir76a
FBgn0033048	2.37075	-1.93848	7.78832	0.0147479	0.292275	chr2R	5960274	5966856	-	protein_coding	CG7881
FBgn0033629	2.32036	-1.28256	13.5032	0.00260665	0.163947	chr2R	11377192	11379177	-	protein_coding	Tsp47F
FBgn0031547	2.29763	2.03031	13.4419	0.00270844	0.16506	chr2L	3522520	3524056	-	protein_coding	Sr-CIV
FBgn0030356	2.29687	-1.17991	5.22326	0.0388706	0.420536	chrX	11917805	11918678	-	lincRNA	CR32661
FBgn0013771	2.28587	1.25995	9.88359	0.0074408	0.233917	chr2R	14879355	14881372	-	protein_coding	Cyp6a9
FBgn0036183	2.28347	0.106012	6.17255	0.0267776	0.365905	chr3L	11624527	11626125	-	protein_coding	CG6083
FBgn0262607	2.26321	2.51303	8.99456	0.0111402	0.266405	chrX	18129584	18130178	-	protein_coding	CG43133
FBgn0039551	2.25957	-1.69969	7.18751	0.0182547	0.317805	chr3R	27845949	27847260	+	protein_coding	Or98a
FBgn0264984	2.25243	-0.815736	12.0023	0.00393485	0.183282	chr3R	11977639	11978178	-	lincRNA	CR44135
FBgn0024977	2.24424	-0.778563	7.36736	0.017112	0.308807	chrX	2726677	2727568	+	protein_coding	CG2709
FBgn0050098	2.22144	2.13766	4.96031	0.0472759	0.448712	chr2R	16354223	16355215	-	protein_coding	CG30098
FBgn0266819	2.16714	-2.26465	5.21145	0.0390598	0.421951	chr2R	9559254	9565190	-	lincRNA	CR45281
FBgn0262878	2.16363	-1.70593	5.39847	0.0361867	0.407048	chr2L	20472792	20473385	-	protein_coding	CG43233
FBgn0039525	2.12551	1.62964	34.9823	4.22e-05	0.0290872	chr3R	27559378	27561319	-	protein_coding	CG5646
FBgn0262533	2.11964	0.562859	16.9425	0.00110723	0.126316	chr3L	17874714	17876573	+	pseudogene	CR43087
FBgn0264792	2.10261	-0.80135	11.3718	0.00471598	0.201463	chr3R	29458778	29459278	-	lincRNA	CR44022
FBgn0263384	2.0362	-1.34731	5.48307	0.034969	0.402373	chr3R	31767123	31767790	-	lincRNA	CR43436
FBgn0040582	2.03399	-0.559811	10.4128	0.00627511	0.220787	chr3R	22087074	22088501	+	protein_coding	CG5791
FBgn0033705	2.02236	-1.54958	5.16486	0.0398169	0.422972	chr2R	12253991	12255701	+	protein_coding	CG13168
FBgn0029766	2.00673	7.63967	23.2403	0.000495828	0.100072	chrX	5429570	5432526	+	protein_coding	CG15784
FBgn0036264	1.99253	0.131831	6.03746	0.0280801	0.372276	chr3L	12197790	12199030	+	protein_coding	CG11529
FBgn0053294	1.98375	-0.848703	6.39749	0.0244558	0.357028	chr3R	4186962	4196210	+	pseudogene	CR33294
FBgn0030641	1.9807	0.0681552	15.8662	0.00143052	0.132878	chrX	15462721	15466812	+	protein_coding	CG6299
FBgn0036128	1.98045	-2.10714	5.11331	0.0406747	0.424887	chr3L	11100674	11101698	-	protein_coding	Elo68beta
FBgn0053461	1.9588	0.843415	5.93274	0.0295887	0.377931	chr2R	15695385	15696478	+	protein_coding	CG33461
FBgn0053508	1.94763	4.03166	23.8316	0.000315654	0.0748996	chr2L	21086789	21088751	-	protein_coding	ppk13
FBgn0032639	1.94398	2.27165	5.59081	0.036124	0.406603	chr2L	17456669	17458044	-	protein_coding	CG18563
FBgn0264481	1.94139	-1.785	5.3403	0.0370529	0.410999	chr3L	19909364	19910203	+	lincRNA	CR43889
FBgn0016920	1.93577	0.182336	12.3088	0.00360967	0.18233	chr2L	5346236	5365760	+	protein_coding	nompC
FBgn0010395	1.92452	2.54537	6.40191	0.0267144	0.36539	chr2L	21053032	21058044	+	protein_coding	Itgbetanu
FBgn0032422	1.9176	4.26777	5.38983	0.0425224	0.43234	chr2L	12175450	12177886	-	protein_coding	atilla
FBgn0264835	1.90455	1.70615	13.5291	0.00258872	0.163947	chr2R	1368920	1371468	-	lincRNA	CR44043
FBgn0265760	1.89104	-1.26233	6.61915	0.0224966	0.342626	chr3L	17633039	17633317	-	lincRNA	CR44567
FBgn0053509	1.8879	3.20049	15.5001	0.00168451	0.136713	chr2L	21084604	21086506	-	protein_coding	CG33509
FBgn0034098	1.87897	2.5251	34.5978	4.46e-05	0.0290872	chr2R	16238102	16240722	-	protein_coding	krimp
FBgn0264857	1.86749	-0.0171979	11.1201	0.00507699	0.205882	chr3R	16831115	16923231	-	lincRNA	iab-8
FBgn0031860	1.86027	0.161802	5.82686	0.030491	0.380525	chr2L	6803010	6804372	+	protein_coding	CG11236
FBgn0262970	1.84749	-1.18662	6.20087	0.0263623	0.364852	chr2R	4780310	4783646	-	pseudogene	CR43281
FBgn0038784	1.84007	0.260302	15.4967	0.00156568	0.136713	chr3R	20306215	20307537	-	protein_coding	CG4362
FBgn0039807	1.82173	0.988865	5.57165	0.0340438	0.400117	chr3R	30874364	30876186	-	protein_coding	CG15546
FBgn0038020	1.82054	4.64348	28.4686	0.000144823	0.050116	chr3R	12366162	12367564	-	protein_coding	GstD9
FBgn0052625	1.80482	1.9873	18.2562	0.000820376	0.116503	chrX	13756163	13756826	-	protein_coding	CG32625
FBgn0037751	1.80383	-0.291322	13.2299	0.00280422	0.167144	chr3R	9775120	9777943	+	protein_coding	topi
FBgn0264437	1.79737	1.08175	4.76406	0.0480315	0.451196	chr2L	8590369	8594489	-	lincRNA	CR43855
FBgn0035941	1.79417	0.574911	9.58431	0.00811755	0.239629	chr3L	8958856	8960921	+	protein_coding	CG13313
FBgn0036330	1.78351	0.405844	15.6555	0.00150586	0.135419	chr3L	13006816	13007881	+	protein_coding	CG11263
FBgn0030455	1.78185	-1.29612	5.74036	0.031551	0.385528	chrX	13153460	13154924	-	protein_coding	CG4318
FBgn0030593	1.78021	3.69151	28.7242	0.000110622	0.0485602	chrX	14901843	14905549	-	protein_coding	CG9512
FBgn0000442	1.76659	-0.776342	12.1787	0.00374381	0.18233	chr2L	786152	790798	-	protein_coding	Pkg21D
FBgn0052212	1.76311	0.882976	24.3579	0.000237587	0.0672871	chr3L	19487559	19488348	+	protein_coding	CG32212
FBgn0085244	1.76294	1.39797	7.50741	0.0162796	0.3041	chr2R	6831295	6831793	-	protein_coding	CG34215
FBgn0033374	1.75365	0.834235	12.3996	0.00351945	0.180766	chr2R	9092505	9094658	-	protein_coding	CG13741
FBgn0039051	1.73206	1.35022	4.7471	0.0484676	0.452682	chr3R	23095689	23097240	+	protein_coding	CG17109
FBgn0052483	1.71542	-0.961791	5.50508	0.0346601	0.402373	chr3L	688522	690081	-	protein_coding	CG32483
FBgn0037205	1.70941	0.307454	11.1426	0.00504338	0.205468	chr3L	22901911	22905470	+	protein_coding	BoYb
FBgn0037684	1.70385	0.668959	7.6509	0.0154752	0.298304	chr3R	9365397	9367763	+	protein_coding	CG8129
FBgn0030852	1.70053	1.03109	10.1377	0.00682724	0.222411	chrX	17629790	17632047	-	protein_coding	CG8316
FBgn0033520	1.69688	-0.373025	6.69594	0.021861	0.342287	chr2R	10424435	10425471	+	protein_coding	Prx2540-1
FBgn0035317	1.69457	0.199717	12.4838	0.003438	0.17999	chr3L	2229645	2235253	+	protein_coding	Oseg2
FBgn0083050	1.68606	-0.865773	7.1029	0.0188228	0.321661	chr3R	30207492	30207630	-	snoRNA	snoRNA:Psi18S-1377b
FBgn0036731	1.67396	-1.24481	7.32046	0.0174017	0.310871	chr3L	17480128	17486230	-	protein_coding	CG6333
FBgn0262620	1.6737	3.16591	23.4527	0.000281608	0.0714807	chr2L	21657624	21658249	+	lincRNA	CR43144
FBgn0031857	1.66337	-0.475863	8.83885	0.0103292	0.257264	chr2L	6759828	6772755	-	protein_coding	CG11321
FBgn0026315	1.6535	2.57878	6.39011	0.0259994	0.363029	chr3R	11170816	11172664	-	protein_coding	Ugt35a
FBgn0027494	1.63953	-0.833885	5.74822	0.0314529	0.385311	chr3R	27652759	27653363	+	protein_coding	RpS10a
FBgn0050379	1.59665	3.14261	40.9747	1.88e-05	0.0157083	chr2R	7939955	7941870	+	protein_coding	CG30379
FBgn0038358	1.57886	0.0741475	7.737	0.0150148	0.294203	chr3R	15774415	15777640	+	protein_coding	CG4525
FBgn0038261	1.57829	0.922411	16.0703	0.00136163	0.132827	chr3R	14798985	14801163	+	protein_coding	CG14856
FBgn0031528	1.5776	-0.184532	9.13835	0.00936577	0.254163	chr2L	3373566	3375711	-	protein_coding	CG15412
FBgn0038629	1.57595	1.04011	12.7686	0.00317831	0.173856	chr3R	18592800	18621327	-	protein_coding	CG14304
FBgn0039316	1.56253	1.67853	6.98974	0.0196152	0.326091	chr3R	25289888	25291366	+	protein_coding	CG11893
FBgn0050148	1.54996	3.61466	5.79892	0.0342495	0.400353	chr2R	20546594	20547658	-	protein_coding	CG30148
FBgn0016675	1.54969	1.301	7.84909	0.014439	0.289423	chr2L	19417446	19418274	+	protein_coding	Lectin-galC1
FBgn0266627	1.54919	-0.853395	7.14656	0.0185271	0.319566	chr2R	10478042	10478795	+	lincRNA	CR45134
FBgn0036206	1.54828	0.627362	17.826	0.000903677	0.12021	chr3L	11790211	11793283	-	protein_coding	CG5964
FBgn0028430	1.54138	5.59476	5.17562	0.0461831	0.444296	chr2L	13972095	13972947	-	protein_coding	He
FBgn0037915	1.53664	-0.669914	5.34337	0.0370065	0.410965	chr3R	11575900	11578745	-	protein_coding	CG6790
FBgn0052088	1.52721	-0.377421	7.26823	0.0177312	0.313537	chr3L	11728344	11732048	+	protein_coding	CG32088
FBgn0261628	1.52416	2.15539	8.49633	0.0115752	0.269561	chr2L	13930321	13931362	-	protein_coding	CG42711
FBgn0033775	1.51727	2.71389	13.2404	0.00279636	0.167144	chr2R	12840812	12842558	-	protein_coding	Cyp9h1
FBgn0033131	1.5153	1.39929	17.6721	0.000935802	0.122229	chr2R	7039129	7039813	+	pseudogene	CR12842
FBgn0262808	1.51458	2.5138	8.58908	0.0112214	0.267349	chr3R	14256107	14256930	+	protein_coding	CG43179
FBgn0034140	1.50139	4.15174	7.84807	0.0168585	0.308186	chr2R	16574578	16576586	-	protein_coding	CG8317
FBgn0083960	1.49877	-0.929658	7.3724	0.0170812	0.308739	chr2L	4958410	4965430	+	protein_coding	CG34124
FBgn0267339	1.49664	0.500337	7.52227	0.0161941	0.303177	chr3R	24149019	24150203	-	protein_coding	p38c
FBgn0044046	1.49447	0.114562	5.30273	0.0376251	0.414987	chrX	3667620	3668845	+	protein_coding	Ilp7
FBgn0035870	1.49177	0.023748	8.94147	0.0099867	0.256575	chr3L	8305335	8306980	-	protein_coding	Gr66a
FBgn0032228	1.48663	0.0276882	6.01368	0.0283408	0.373882	chr2L	10354742	10356597	-	protein_coding	CG5367
FBgn0263981	1.48584	-1.47162	5.13743	0.0402706	0.424117	chr2R	16288926	16291474	-	lincRNA	CR43730
FBgn0265966	1.48147	0.177549	8.94206	0.00998476	0.256575	chrX	391834	393227	-	lincRNA	CR44753
FBgn0026874	1.47638	-0.541212	6.29268	0.0254513	0.360051	chrX	803423	804921	-	protein_coding	CG13358
FBgn0053632	1.46149	-0.911658	9.09675	0.00949316	0.254461	chr2R	12522022	12522731	+	protein_coding	CG33632
FBgn0040859	1.46112	-0.206601	6.2889	0.025488	0.360051	chrX	12091263	12092272	+	lincRNA	CR32658
FBgn0032345	1.46097	-0.161764	10.1452	0.00681148	0.222411	chr2L	11120641	11121714	-	protein_coding	CG14921
FBgn0062978	1.45239	4.15508	14.8608	0.00204764	0.147961	chr2L	16704285	16716195	-	protein_coding	CG31808
FBgn0036116	1.44955	4.99423	9.03818	0.011838	0.271417	chr3L	11054034	11059659	+	protein_coding	CG7888
FBgn0264265	1.44917	-0.107533	7.73456	0.0150276	0.294203	chr2L	22239182	22239713	-	lincRNA	CR43765
FBgn0265634	1.44582	0.228443	9.07763	0.00955236	0.254522	chr4	194731	195900	+	lincRNA	CR44441
FBgn0039467	1.44208	5.08506	11.1078	0.00633873	0.220882	chr3R	26978540	26985706	+	protein_coding	CG14253
FBgn0053868	1.44164	-0.893092	4.88472	0.0447509	0.438881	chr2L	21537504	21538099	-	protein_coding	His2B:CG33868
FBgn0029754	1.43973	0.279389	8.18899	0.0128437	0.279241	chrX	5315129	5317295	-	protein_coding	CG15930
FBgn0035587	1.43797	0.843795	5.11368	0.0406684	0.424887	chr3L	5141952	5144317	+	protein_coding	CG4623
FBgn0265651	1.42732	1.44985	12.4948	0.00342754	0.17999	chr2R	15371694	15372595	+	lincRNA	CR44458
FBgn0032598	1.42586	2.61694	25.8019	0.000182729	0.0572954	chr2L	16738849	16742610	+	protein_coding	ChLD3
FBgn0040377	1.42485	0.436195	8.6227	0.0110962	0.266405	chrX	2579090	2580560	-	protein_coding	Vha36-3
FBgn0063494	1.41994	4.352	6.7435	0.0247364	0.357193	chr2R	18406010	18406761	+	protein_coding	GstE6
FBgn0085261	1.36189	4.55159	18.8558	0.00077462	0.114299	chr2R	12164908	12165812	-	protein_coding	CG34232
FBgn0033574	1.35971	4.63819	11.0751	0.0061235	0.218162	chr2R	10938424	10941738	-	protein_coding	Spn47C
FBgn0259678	1.35808	1.8101	7.58915	0.0158156	0.300952	chr2R	9716347	9748121	-	protein_coding	sqa
FBgn0029752	1.3432	-1.56306	4.88397	0.0447651	0.438881	chrX	5310580	5311888	-	protein_coding	TrxT
FBgn0030569	1.34288	1.69542	5.8965	0.0296678	0.378039	chrX	14472407	14480086	-	protein_coding	CG9411
FBgn0000092	1.34007	0.380724	7.07924	0.0189853	0.32209	chrX	2692731	2693886	-	protein_coding	CG2650
FBgn0036612	1.32116	0.135101	4.82306	0.0459318	0.443629	chr3L	16339002	16345241	+	protein_coding	CG4998
FBgn0038088	1.31869	5.42679	27.3465	0.000139503	0.050116	chr3R	12855543	12859246	-	protein_coding	CG10126
FBgn0041246	1.31461	0.269924	5.86917	0.0299877	0.379575	chr2L	11114013	11115823	+	protein_coding	Gr32a
FBgn0031936	1.29548	0.63711	5.87131	0.0299625	0.379575	chr2L	7719846	7722823	-	protein_coding	CG13794
FBgn0033874	1.28839	1.24075	4.87377	0.0449581	0.439262	chr2R	13836418	13839363	+	protein_coding	CG6347
FBgn0001078	1.2705	5.52404	23.2793	0.000308729	0.0748996	chr3L	18750606	18801309	-	protein_coding	ftz-f1
FBgn0039101	1.26981	0.830923	9.06349	0.00959643	0.25528	chr3R	23682502	23683980	+	protein_coding	CG16710
FBgn0031232	1.25893	-0.922475	5.17031	0.0397274	0.422972	chr2L	204742	207297	-	protein_coding	CG11617
FBgn0053696	1.24942	2.10153	16.2135	0.00131559	0.132003	chr3L	9644108	9659433	+	protein_coding	CNMaR
FBgn0266227	1.24688	3.37269	10.1385	0.00682558	0.222411	chr3R	4375083	4377600	+	lincRNA	CR44922
FBgn0010317	1.24381	1.6535	10.5744	0.00597488	0.216915	chr3L	3466427	3468098	+	protein_coding	CycJ
FBgn0032706	1.24055	3.85286	19.6545	0.000604743	0.102341	chr2L	18711070	18713748	-	protein_coding	Irk3
FBgn0266758	1.23119	5.53641	9.2399	0.0108457	0.264133	chr3R	24544718	24556549	+	protein_coding	Esyt2
FBgn0264907	1.22224	5.23004	17.3333	0.00110326	0.126316	chr3R	4750408	4773197	-	protein_coding	CG44098
FBgn0035695	1.22188	2.46718	7.1554	0.0184679	0.319172	chr3L	6234322	6240068	-	protein_coding	CG10226
FBgn0034756	1.22056	0.843829	6.91488	0.0201609	0.328969	chr2R	22652572	22654530	-	protein_coding	Cyp6d2
FBgn0085248	1.2202	0.0686623	6.33049	0.0250868	0.358713	chr2R	8917707	8918877	-	protein_coding	CG34219
FBgn0267229	1.21216	0.177144	6.61731	0.022512	0.342626	chr3R	28970540	28972750	+	lincRNA	CR45669
FBgn0037683	1.21185	0.37275	4.63515	0.0497644	0.456585	chr3R	9363304	9364838	+	protein_coding	CG18473
FBgn0266624	1.20997	1.48129	11.5093	0.00453139	0.19698	chr2R	7631494	7635219	-	lincRNA	CR45131
FBgn0031689	1.20423	5.17373	9.72633	0.00902576	0.250765	chr2L	5210459	5212445	+	protein_coding	Cyp28d1
FBgn0030222	1.20255	0.489579	7.37535	0.0170632	0.308739	chrX	10623724	10627112	-	protein_coding	CG9806
FBgn0051436	1.19476	2.6774	10.1789	0.00674093	0.222071	chr3R	25304136	25305651	+	protein_coding	CG31436
FBgn0024150	1.17631	5.26899	18.509	0.00080487	0.116503	chr3L	21136446	21171930	-	protein_coding	Ac78C
FBgn0050343	1.17519	-0.17533	5.23671	0.0386564	0.42003	chr2R	9252020	9253255	+	protein_coding	CG30343
FBgn0051414	1.1693	2.31127	13.0967	0.00290674	0.169059	chr3R	23704803	23708512	+	protein_coding	CG31414
FBgn0038741	1.16	4.0614	23.4169	0.000283529	0.0714807	chr3R	19875973	19877514	-	protein_coding	CG17186
FBgn0033921	1.15946	1.67161	14.4391	0.0020418	0.147961	chr2R	14300102	14302353	-	protein_coding	tej
FBgn0034175	1.1563	0.705561	12.2004	0.003721	0.18233	chr2R	16998609	17000126	-	protein_coding	ste24b
FBgn0266534	1.15535	1.83718	5.55069	0.0340303	0.400117	chr3R	25102552	25103617	+	protein_coding	CG45095
FBgn0037107	1.15428	6.27562	26.2033	0.000170172	0.0551364	chr3L	21619999	21625647	-	protein_coding	CG7166
FBgn0035439	1.15405	0.96869	5.55874	0.0339205	0.399202	chr3L	3330062	3333181	+	protein_coding	CG14961
FBgn0032850	1.14903	1.13942	6.73322	0.0215601	0.339527	chr2L	20097580	20103375	+	protein_coding	Kua
FBgn0031634	1.14632	0.132036	6.92941	0.0200536	0.328165	chr2L	4830845	4835300	-	protein_coding	Ir25a
FBgn0084049	1.1409	0.559932	4.97795	0.0430329	0.433207	chr2R	4731513	4732343	+	pseudogene	CR41440
FBgn0085440	1.13951	1.55448	6.31432	0.0252419	0.359163	chrX	13161713	13189164	-	protein_coding	CG34411
FBgn0250757	1.12548	5.76676	29.2469	0.000101511	0.0481736	chr3R	25907021	25921046	+	protein_coding	CG42235
FBgn0036208	1.12449	4.96697	5.80203	0.0342964	0.400353	chr3L	11798947	11800861	-	protein_coding	CG10361
FBgn0263116	1.12166	3.07546	10.1794	0.00674006	0.222071	chr2R	19022324	19032642	-	protein_coding	5-HT1B
FBgn0033388	1.1169	2.0341	9.19064	0.00920845	0.252255	chr2R	9162036	9164967	-	protein_coding	CG8046
FBgn0037717	1.11342	3.24122	23.3161	0.000289033	0.0714807	chr3R	9581305	9586648	+	protein_coding	CG8301
FBgn0261363	1.11232	3.81793	7.03817	0.0201788	0.328969	chr2R	23064768	23067183	+	protein_coding	PPO3
FBgn0051248	1.1111	0.798521	8.4212	0.0118713	0.271417	chr3R	7129319	7130908	+	protein_coding	CG31248
FBgn0266691	1.10966	0.64838	8.44658	0.0117703	0.270894	chr3L	27135423	27136049	-	lincRNA	CR45181
FBgn0036560	1.10725	4.56886	7.66245	0.0170092	0.308739	chr3L	16035484	16037227	+	protein_coding	CG5895
FBgn0263353	1.1072	3.77538	10.8151	0.00555787	0.212749	chr3R	5802327	5813258	+	protein_coding	CG11000
FBgn0263504	1.10638	1.17057	7.51899	0.016213	0.303177	chrX	22487853	22490872	-	lincRNA	CR43493
FBgn0038294	1.10129	5.74156	8.49414	0.0134936	0.286499	chr3R	15170624	15181510	-	protein_coding	Mf
FBgn0031926	1.09764	4.42725	8.51319	0.0124966	0.275803	chr2L	7608388	7616533	+	protein_coding	CG6739
FBgn0045038	1.09675	6.34353	10.2935	0.00775853	0.238168	chr2L	7864641	7871432	-	protein_coding	Proc
FBgn0040571	1.09475	2.68837	6.24534	0.0259163	0.362689	chr3R	20036420	20056097	-	protein_coding	CG17193
FBgn0039855	1.09233	0.783284	8.55366	0.011355	0.269281	chr3R	31590580	31592316	+	protein_coding	CG1638
FBgn0033174	1.08906	2.79814	15.4253	0.00159348	0.136713	chr2R	7447472	7449995	+	protein_coding	CG11125
FBgn0028490	1.0845	8.66441	28.8176	0.000108927	0.0485602	chr2L	11523020	11528205	-	protein_coding	CG31705
FBgn0030437	1.08396	1.54267	9.39881	0.00861177	0.245477	chrX	12950435	12957462	-	protein_coding	hec
FBgn0015577	1.0782	5.46198	16.4148	0.00130703	0.132003	chr3R	7493920	7505098	-	protein_coding	alpha-Est9
FBgn0039972	1.07497	3.19825	8.92144	0.0100525	0.256575	chr2L	22308754	22368796	+	protein_coding	CG17018
FBgn0039747	1.07364	0.902132	4.90906	0.0442947	0.437442	chr3R	30134855	30149606	-	protein_coding	AdoR
FBgn0035231	1.07054	4.03017	18.2598	0.000819722	0.116503	chr3L	1553492	1555315	+	protein_coding	Cct2
FBgn0035816	1.0701	3.2657	9.29502	0.00890348	0.249172	chr3L	7747343	7750552	+	protein_coding	CG13685
FBgn0036995	1.06544	3.61058	13.5245	0.00259194	0.163947	chr3L	20454689	20464862	-	protein_coding	atk
FBgn0033274	1.06506	1.5514	11.2717	0.0048559	0.202529	chr2R	8172363	8173613	-	protein_coding	CG14757
FBgn0035708	1.05834	3.88648	8.59139	0.0113891	0.269281	chr3L	6609324	6619113	+	protein_coding	CG8398
FBgn0031518	1.05696	1.71191	9.72801	0.0077572	0.238168	chr2L	3304099	3317418	+	protein_coding	CG3277
FBgn0004580	1.05693	5.58449	12.6061	0.00368994	0.18233	chr2R	16973926	16996057	+	protein_coding	Cbp53E
FBgn0031548	1.05672	0.536296	5.74586	0.0314822	0.385311	chr2L	3525130	3527588	+	protein_coding	CG8852
FBgn0030258	1.05314	5.89586	9.49473	0.00968245	0.256432	chrX	11052170	11053556	-	protein_coding	CG1552
FBgn0029821	1.05198	1.01515	10.0222	0.00707575	0.227613	chrX	5905745	5908001	+	protein_coding	CG4020
FBgn0260657	1.05078	5.14655	14.6712	0.00196255	0.147899	chr3L	4556086	4592295	+	protein_coding	CG42540
FBgn0039007	1.04902	3.40496	15.948	0.00140244	0.132848	chr3R	22700581	22702084	-	protein_coding	CCAP
FBgn0004872	1.04668	1.20032	7.80919	0.014641	0.291475	chr2L	10982204	10987420	-	protein_coding	piwi
FBgn0005660	1.04582	3.93383	7.38216	0.0176351	0.312153	chr2L	544924	552923	-	protein_coding	Ets21C
FBgn0010482	1.04241	3.0877	6.85478	0.0206117	0.332634	chr2R	6721100	6740672	-	protein_coding	l(2)01289
FBgn0266721	1.04016	2.22683	10.2836	0.00652768	0.220882	chr3R	10120398	10121400	-	protein_coding	gammaSnap2
FBgn0028397	1.0385	2.59928	8.88603	0.0101701	0.256575	chrX	16074716	16091495	-	protein_coding	Tob
FBgn0036876	1.03557	4.10858	8.50248	0.0119771	0.272752	chr3L	19498196	19500798	-	protein_coding	CG9451
FBgn0266697	1.03517	0.323807	4.7161	0.0480689	0.451196	chr3R	4402428	4402928	-	lincRNA	CR45187
FBgn0035168	1.03121	3.39562	17.6537	0.000939741	0.122229	chr3L	843925	851080	+	protein_coding	CG13889
FBgn0037759	1.029	0.393698	5.92671	0.0293189	0.376899	chr3R	9801279	9803461	+	protein_coding	CG8526
FBgn0032484	1.02794	2.57724	13.1499	0.00286531	0.169059	chr2L	13212334	13215350	-	protein_coding	kek4
FBgn0038063	1.02224	2.37054	11.8118	0.00415387	0.187794	chr3R	12550624	12595725	-	protein_coding	Octbeta2R
FBgn0004652	1.01876	6.65945	15.9953	0.00149946	0.135419	chr3R	18414272	18545586	-	protein_coding	fru
FBgn0033904	1.01733	0.823261	6.58119	0.0228187	0.346005	chr2R	14166981	14168233	+	protein_coding	CG18327
FBgn0036461	1.00737	3.74087	16.7443	0.00115985	0.128004	chr3L	14992288	14997983	+	protein_coding	Zip71B
FBgn0032337	1.00629	3.66563	14.1429	0.00220371	0.152342	chr2L	11083458	11085229	-	protein_coding	AstCC
FBgn0260475	1.00611	1.55327	11.2254	0.00492214	0.203458	chr2R	13412768	13414620	-	protein_coding	CG30059
FBgn0028374	1.00558	5.85592	12.0777	0.0042904	0.19124	chr3R	12526187	12529076	+	protein_coding	Hug
FBgn0032010	1.00482	4.65007	8.48982	0.0124429	0.275803	chr2L	8244159	8257502	-	protein_coding	CG8086
FBgn0004516	1.00355	6.10255	9.44703	0.00975879	0.256575	chr3L	4074076	4088744	-	protein_coding	Gad1
FBgn0036145	1.00339	6.08395	7.6685	0.0175947	0.312153	chr3L	11199619	11200587	+	protein_coding	CG7607
FBgn0032336	1.00261	3.08236	10.7113	0.00573341	0.213743	chr2L	11076164	11081399	-	protein_coding	AstC
FBgn0038956	1.00148	2.01612	7.61654	0.0156636	0.300435	chr3R	22386488	22389714	-	protein_coding	CG5379
FBgn0050187	0.998302	3.32245	8.47925	0.0116417	0.270036	chr2R	22916842	22918790	-	protein_coding	CG30187
FBgn0052027	0.997321	1.67931	10.7694	0.00563436	0.213025	chr3L	18841578	18842786	+	lincRNA	CR32027
FBgn0031765	0.995925	3.46368	11.0746	0.00514561	0.206755	chr2L	6025869	6034423	-	protein_coding	CG9109
FBgn0033744	0.995829	4.18724	15.583	0.00153286	0.136627	chr2R	12474423	12487986	+	protein_coding	Dh44-R2
FBgn0031986	0.992954	1.22836	6.88316	0.0203973	0.330802	chr2L	8124328	8125799	+	protein_coding	CG8673
FBgn0039178	0.986782	5.04093	14.9887	0.00177627	0.139193	chr3R	24283954	24288617	+	protein_coding	CG6356
FBgn0052641	0.985001	4.65505	15.7782	0.00146144	0.134353	chrX	13184477	13184996	+	protein_coding	CG32641
FBgn0264087	0.983719	3.55658	13.3991	0.00267996	0.16506	chr2L	7642004	7675078	-	protein_coding	Slob
FBgn0012344	0.982723	5.49432	14.9219	0.00182829	0.140674	chr3R	9638181	9650706	+	protein_coding	Dh44
FBgn0052225	0.979641	4.60244	18.6539	0.000751143	0.112247	chr3L	20304309	20306283	-	protein_coding	CG32225
FBgn0038419	0.979124	3.61154	7.97104	0.0138415	0.286919	chr3R	16345824	16349226	-	protein_coding	CG14879
FBgn0024912	0.977399	3.55075	15.64	0.0015116	0.135419	chr3R	6659407	6660100	-	protein_coding	agt
FBgn0039742	0.976489	0.197361	4.71637	0.0480632	0.451196	chr3R	30048634	30052112	-	protein_coding	CG15528
FBgn0028899	0.973794	1.61655	5.83315	0.0304155	0.380525	chr2L	16330559	16337885	-	protein_coding	CG31817
FBgn0266805	0.972742	0.834006	8.19009	0.0128389	0.279241	chr2R	8019175	8026595	+	lincRNA	CR45267
FBgn0263776	0.972333	6.46223	12.542	0.00374798	0.18233	chr3L	11036357	11051371	-	protein_coding	CG43693
FBgn0033368	0.971322	3.5368	8.95753	0.00993432	0.256575	chr2R	9044849	9060608	-	protein_coding	CG13743
FBgn0036391	0.968529	3.06688	14.1065	0.00222461	0.153184	chr3L	13977904	13993400	-	protein_coding	CG17364
FBgn0264489	0.967493	5.15536	8.49868	0.0125029	0.275803	chr3L	9813846	9834345	+	protein_coding	CG43897
FBgn0040837	0.967085	2.58563	5.99072	0.0285952	0.374516	chr3L	7158098	7158874	+	protein_coding	CG8620
FBgn0039915	0.960299	6.26683	6.41236	0.0274048	0.369585	chr4	629690	635350	+	protein_coding	CG1732
FBgn0266687	0.957626	1.81496	7.8925	0.014223	0.287703	chr3L	27091704	27092199	-	lincRNA	CR45177
FBgn0039809	0.954203	3.40835	11.0939	0.00511639	0.206654	chr3R	30881791	30883503	-	protein_coding	CG15547
FBgn0259216	0.951275	2.90477	4.82806	0.0458348	0.443572	chr4	254996	265574	+	protein_coding	RhoGAP102A
FBgn0026197	0.946896	6.97698	6.50818	0.0261334	0.363611	chr3L	17400346	17401348	-	protein_coding	noe
FBgn0051221	0.944686	6.44618	9.98564	0.00802224	0.239629	chr3R	19412688	19460311	+	protein_coding	CG31221
FBgn0034262	0.944576	0.791085	5.49202	0.034843	0.402373	chr2R	17690274	17695353	-	protein_coding	swi2
FBgn0030309	0.942728	6.9314	6.49987	0.0262106	0.363879	chrX	11555049	11558654	-	protein_coding	CG1572
FBgn0267428	0.940794	3.92991	9.44023	0.00849848	0.244231	chr2R	432218	705848	+	protein_coding	CG45781
FBgn0038465	0.93957	5.85802	5.8411	0.0336089	0.398631	chr3R	17002874	17007208	+	protein_coding	Irc
FBgn0039420	0.938695	2.98211	11.2309	0.00491431	0.203458	chr3R	26262661	26277050	+	protein_coding	CG6154
FBgn0040370	0.937977	4.0466	10.07	0.00697163	0.226275	chrX	283185	294962	-	protein_coding	CG13375
FBgn0037676	0.937829	4.01831	8.66449	0.0109429	0.264664	chr3R	9293641	9328511	-	protein_coding	CG8861
FBgn0035041	0.937651	3.15406	11.9331	0.0040128	0.185301	chr2R	24615422	24638588	-	protein_coding	CG13594
FBgn0030257	0.937465	3.43445	12.0729	0.00385701	0.182692	chrX	11044755	11049540	+	protein_coding	CG11160
FBgn0038343	0.934242	3.08117	11.4618	0.00459431	0.197566	chr3R	15484729	15485396	-	protein_coding	Trissin
FBgn0013767	0.932795	4.55	9.11033	0.00973529	0.256575	chr3R	14314853	14315716	+	protein_coding	Crz
FBgn0028550	0.931825	4.63621	21.8343	0.000385894	0.0876352	chrX	1242739	1275284	-	protein_coding	Atf3
FBgn0033448	0.931749	4.69645	9.93944	0.00744584	0.233917	chr2R	9828103	9836642	-	protein_coding	hebe
FBgn0037976	0.927727	2.40638	9.65855	0.00792902	0.239629	chr3R	11994174	12005473	-	protein_coding	Tk
FBgn0263118	0.926945	2.62216	4.97602	0.0430675	0.433207	chr3R	26440777	26448991	+	protein_coding	tx
FBgn0036479	0.924336	1.73327	7.35643	0.017179	0.309211	chr3L	15113556	15116373	+	protein_coding	CG13458
FBgn0031294	0.924002	9.09942	9.39511	0.00926572	0.253422	chr2L	1008377	1048053	-	protein_coding	IA-2
FBgn0263241	0.921128	3.9038	27.185	0.000143423	0.050116	chr3L	11070525	11073348	+	protein_coding	Mocs1
FBgn0260932	0.920988	2.37959	9.82305	0.00752903	0.234401	chr2R	11886066	11887603	+	protein_coding	cuff
FBgn0030747	0.914043	3.0251	7.97541	0.0138207	0.286919	chrX	16405508	16414651	+	protein_coding	CG4301
FBgn0033381	0.911334	5.14162	20.0957	0.000550819	0.102069	chr2R	9122124	9123309	+	protein_coding	GstE13
FBgn0037046	0.910108	2.87028	17.1556	0.00105367	0.125894	chr3L	21033553	21034203	-	protein_coding	CG10581
FBgn0037974	0.905015	2.51338	6.40192	0.0244147	0.357006	chr3R	11980703	11982622	-	protein_coding	CG12224
FBgn0030574	0.894142	6.7007	19.5543	0.000617812	0.102341	chrX	14584732	14602580	-	protein_coding	CG9413
FBgn0019661	0.891246	9.04364	5.28092	0.0411265	0.427555	chrX	3857229	3862697	-	lincRNA	roX1
FBgn0263747	0.883759	1.42805	4.67506	0.0489197	0.454738	chrX	15773170	15778703	+	protein_coding	CG43672
FBgn0034406	0.8833	4.5706	5.94864	0.0306048	0.381127	chr2R	18860374	18862078	-	protein_coding	Jheh3
FBgn0032899	0.883192	6.36427	10.853	0.0059469	0.216915	chr2L	20865214	20867709	+	protein_coding	CG9338
FBgn0020907	0.881142	2.80745	10.7941	0.00559282	0.212749	chr3R	16574542	16583663	-	protein_coding	Scp2
FBgn0000246	0.879291	3.2189	16.0802	0.00135839	0.132827	chr3R	15789472	15792579	-	protein_coding	c(3)G
FBgn0265605	0.87781	6.66362	19.8099	0.000585084	0.102319	chr2R	16107439	16110017	-	protein_coding	Ric
FBgn0034638	0.874192	5.39713	14.4366	0.0020431	0.147961	chr2R	21605675	21608125	-	protein_coding	CG10433
FBgn0032840	0.874186	5.30126	16.6924	0.00117409	0.128004	chr2L	20027914	20056373	+	protein_coding	sNPF
FBgn0030237	0.871902	7.46962	5.31267	0.0406707	0.424887	chrX	10842204	10842995	+	protein_coding	CG15209
FBgn0013467	0.870884	6.41191	12.3922	0.00371344	0.18233	chr2R	15155436	15190292	+	protein_coding	igl
FBgn0014141	0.865637	7.8708	8.04627	0.0145109	0.289822	chr3R	17091532	17125389	-	protein_coding	cher
FBgn0037012	0.864448	3.12713	7.60034	0.0157533	0.300665	chr3L	20527971	20540417	-	protein_coding	Rcd2
FBgn0002891	0.862912	5.00562	16.524	0.00122175	0.130171	chr2R	7793624	7801044	+	protein_coding	mus205
FBgn0266417	0.862679	4.59947	7.25647	0.0184323	0.319172	chr3L	16354745	16359428	-	protein_coding	CG45057
FBgn0035538	0.860497	5.11471	6.71792	0.0229513	0.346755	chr3L	4367648	4380387	-	protein_coding	DopEcR
FBgn0030300	0.858964	2.80234	5.15124	0.0400413	0.4238	chrX	11442538	11446012	+	protein_coding	Sk1
FBgn0027654	0.858415	5.5625	19.4269	0.000634919	0.103227	chr3R	30517058	30527037	-	protein_coding	jdp
FBgn0035996	0.855312	3.34623	15.2031	0.00168365	0.136713	chr3L	9450544	9451572	-	protein_coding	CG3448
FBgn0024315	0.855139	6.38977	28.3938	0.000116866	0.0488583	chr2R	16655322	16667675	-	protein_coding	Picot
FBgn0030028	0.854777	3.27309	10.6291	0.00587702	0.216796	chrX	8269897	8271409	-	protein_coding	Corp
FBgn0039415	0.847768	3.40846	8.89359	0.0101448	0.256575	chr3R	26133153	26137148	+	protein_coding	CG6142
FBgn0035733	0.846144	2.98735	7.68207	0.0153067	0.296656	chr3L	7058929	7077462	-	protein_coding	CG8641
FBgn0036186	0.845774	0.913424	4.68787	0.0486522	0.454165	chr3L	11642905	11646033	-	protein_coding	CG6071
FBgn0035171	0.844564	3.44844	10.154	0.00679301	0.222411	chr3L	865395	871701	+	protein_coding	CG12502
FBgn0050460	0.843483	5.52366	16.1176	0.00134624	0.132801	chr2R	17065970	17087633	-	protein_coding	CG30460
FBgn0050203	0.842956	4.59936	11.9753	0.00396502	0.184185	chr2R	12310688	12313834	+	protein_coding	CG30203
FBgn0261871	0.840603	2.83669	9.07968	0.00954599	0.254522	chr2L	10917014	10964153	-	protein_coding	dpr2
FBgn0020414	0.839064	7.52496	11.8543	0.00412188	0.187503	chr2L	16450906	16455194	+	protein_coding	Idgf3
FBgn0023534	0.838463	3.46756	12.5598	0.00336641	0.178044	chrX	494613	496369	+	protein_coding	CG17778
FBgn0031855	0.836562	2.22342	7.99058	0.0137485	0.28671	chr2L	6742501	6756133	+	protein_coding	CG11221
FBgn0020372	0.835381	5.78438	11.8037	0.00422055	0.189536	chr2R	23878196	23880860	+	protein_coding	TM4SF
FBgn0261429	0.834572	2.22574	5.02351	0.0422216	0.431279	chr2R	5363252	5367357	+	lincRNA	CR42646
FBgn0011581	0.833383	5.28719	11.6886	0.00430317	0.19124	chr3R	24341550	24343825	+	protein_coding	Ms
FBgn0044050	0.833059	4.94474	11.2979	0.00481887	0.201463	chr3L	9801297	9802120	-	protein_coding	Ilp3
FBgn0033932	0.832489	2.13602	5.494	0.0348153	0.402373	chr2R	14378096	14385359	+	protein_coding	Dh44-R1
FBgn0033153	0.831856	5.40246	6.84571	0.0219462	0.342287	chr2R	7249160	7250655	+	protein_coding	Gadd45
FBgn0267429	0.831181	1.36651	4.88113	0.0448188	0.438881	chr3L	25236939	25670980	-	protein_coding	CG45782
FBgn0038395	0.829983	2.69332	7.90275	0.0141725	0.287693	chr3R	16044746	16046130	-	protein_coding	CG10407
FBgn0038098	0.82908	1.99996	7.85559	0.0144064	0.2891	chr3R	12967774	12977471	-	protein_coding	CG7381
FBgn0039209	0.828677	5.59866	19.9275	0.000570695	0.102069	chr3R	24557367	24582864	-	protein_coding	CG13624
FBgn0039332	0.827325	6.68379	9.54927	0.00872324	0.247051	chr3R	25381064	25382781	-	protein_coding	alrm
FBgn0003483	0.826591	3.51006	15.4144	0.00159775	0.136713	chr3R	15837418	15844415	+	protein_coding	spn-E
FBgn0267431	0.826575	4.01168	5.18581	0.0402003	0.424117	chr3R	835380	2503907	+	protein_coding	CG45784
FBgn0030234	0.82362	3.59944	5.31241	0.0374767	0.41361	chrX	10772540	10778981	+	protein_coding	CG15211
FBgn0039277	0.823331	3.91837	9.90516	0.00733814	0.233425	chr3R	25109225	25112516	-	protein_coding	CG13650
FBgn0030484	0.823106	4.76123	14.1672	0.00218985	0.151983	chrX	13404748	13409323	+	protein_coding	GstT4
FBgn0035170	0.821221	3.77446	8.61265	0.0111335	0.266405	chr3L	852719	857248	-	protein_coding	dpr20
FBgn0029974	0.819004	4.46557	6.06704	0.0285459	0.374516	chrX	7903703	7908286	-	protein_coding	dpr14
FBgn0069969	0.818175	6.59198	10.5062	0.00639457	0.220882	chr2R	924635	951252	-	protein_coding	CG40498
FBgn0261584	0.81762	4.00422	7.39217	0.016961	0.308619	chr2R	22941876	22945147	+	protein_coding	CG42694
FBgn0038966	0.817529	3.98743	11.9242	0.00402301	0.185301	chr3R	22423315	22424929	-	protein_coding	pinta
FBgn0086251	0.8144	3.87629	15.5407	0.00154885	0.136713	chr2L	21145136	21148546	-	protein_coding	del
FBgn0044328	0.807639	2.45052	5.81457	0.030639	0.381283	chr3L	9799061	9808713	+	protein_coding	CG32052
FBgn0266005	0.805362	2.10258	5.95727	0.0289707	0.376255	chrX	1047241	1088866	+	lincRNA	CR44779
FBgn0082997	0.804526	1.27108	5.79482	0.0308787	0.382099	chrX	6743674	6743815	-	snoRNA	snoRNA:Psi28S-1232
FBgn0022709	0.804252	4.37937	15.2322	0.00167149	0.136713	chr3L	12200321	12204082	-	protein_coding	Adk1
FBgn0039756	0.802232	4.21006	5.32907	0.0380148	0.416576	chr3R	30196359	30202998	-	protein_coding	CG9743
FBgn0035922	0.799598	5.01526	15.3797	0.00161152	0.136713	chr3L	8647144	8651011	+	protein_coding	Pex7
FBgn0085459	0.796773	1.62827	6.77064	0.0212628	0.336961	chr2R	7943441	7944475	+	protein_coding	CG34430
FBgn0004852	0.796054	3.66282	8.32864	0.0122483	0.27404	chr3L	19939286	19977960	+	protein_coding	Ac76E
FBgn0262631	0.795488	1.7013	5.4067	0.036066	0.406211	chr2L	21624678	21626190	+	lincRNA	CR43148
FBgn0264908	0.793372	3.15461	5.65794	0.0326013	0.393705	chr3L	15848577	15899029	-	protein_coding	pHCl
FBgn0037521	0.792274	5.9447	4.79464	0.0498869	0.456707	chr3R	7804664	7810014	-	protein_coding	CG2993
FBgn0013995	0.79141	3.31409	8.15909	0.0129756	0.280243	chr3R	20978182	21015613	+	protein_coding	Calx
FBgn0038470	0.791408	4.84654	20.6223	0.000493539	0.100072	chr3R	17036393	17040203	-	protein_coding	CG18213
FBgn0053543	0.790235	4.12296	11.1259	0.00506835	0.205882	chr2L	1997101	2006313	-	protein_coding	CG33543
FBgn0037531	0.789497	3.37248	17.0144	0.00108882	0.126316	chr3R	7916598	7920299	-	protein_coding	CG10445
FBgn0032946	0.788617	8.36604	8.35023	0.0125923	0.27655	chr2L	21379999	21393319	+	protein_coding	nrv3
FBgn0037766	0.788007	2.9514	5.20809	0.0391138	0.422126	chr3R	9826080	9868120	-	protein_coding	Teh1
FBgn0036369	0.787285	3.6719	5.35728	0.0367975	0.409979	chr3L	13465551	13474787	-	protein_coding	CG10089
FBgn0014931	0.786203	2.06927	6.81837	0.0208906	0.333774	chr3R	7913850	7916550	+	protein_coding	CG2678
FBgn0051760	0.785044	4.99499	10.9093	0.00540389	0.21086	chr2L	12142779	12170508	+	protein_coding	CG31760
FBgn0037989	0.783951	5.94542	12.6559	0.0032783	0.176576	chr3R	12068374	12090612	-	protein_coding	ATP8B
FBgn0014342	0.782057	3.38262	10.2301	0.00663569	0.222071	chr3R	5548114	5551168	-	protein_coding	mia
FBgn0004513	0.777591	6.70427	12.777	0.00317106	0.173856	chr3L	6240499	6245746	-	protein_coding	Mdr65
FBgn0042173	0.773917	1.36428	4.75271	0.0473244	0.448746	chr2R	7829061	7830429	+	protein_coding	CG18853
FBgn0038972	0.773863	4.18429	5.18549	0.0401223	0.424117	chr3R	22464984	22465938	+	protein_coding	CG7054
FBgn0038084	0.77348	3.52793	10.2965	0.00650199	0.220882	chr3R	12746035	12783192	-	protein_coding	beat-Vc
FBgn0038034	0.773072	3.63295	11.084	0.00513135	0.206654	chr3R	12396006	12398929	-	pseudogene	Cyp9f3Psi
FBgn0003091	0.772645	4.08247	8.7379	0.0106795	0.262301	chr2R	16924654	16945126	+	protein_coding	Pkc53E
FBgn0030432	0.771491	2.1633	8.95675	0.00993685	0.256575	chrX	12903744	12906018	-	protein_coding	CG4404
FBgn0034935	0.770276	4.92723	5.15636	0.0416068	0.428992	chr2R	23946958	23949076	-	protein_coding	CG13565
FBgn0003429	0.768961	3.78761	5.14043	0.0402206	0.424117	chr3R	24662490	24711595	+	protein_coding	slo
FBgn0035673	0.768246	0.997106	5.42754	0.0357626	0.406075	chr3L	6072138	6073539	+	protein_coding	CG6602
FBgn0035756	0.768174	3.78434	6.66372	0.0221251	0.342287	chr3L	7266191	7312896	-	protein_coding	unc-13-4A
FBgn0031945	0.767923	3.2411	9.84686	0.00747309	0.233917	chr2L	7767627	7775033	+	protein_coding	CG7191
FBgn0266354	0.767126	4.68586	5.63449	0.0338861	0.399202	chrX	16969068	17066732	-	protein_coding	CG45002
FBgn0003308	0.765869	3.39246	7.40775	0.0168669	0.308186	chr3R	13032527	13038020	+	protein_coding	ry
FBgn0261262	0.763115	5.82704	8.24765	0.0130978	0.281794	chr3R	18929195	18978088	+	protein_coding	CG42613
FBgn0266020	0.762882	1.06969	5.15427	0.0399913	0.423618	chr2L	21319599	21320320	-	lincRNA	CR44785
FBgn0034389	0.76085	3.62727	8.95273	0.00994994	0.256575	chr2R	18761757	18774824	+	protein_coding	Mctp
FBgn0038092	0.760591	4.68508	8.54328	0.0113945	0.269281	chr3R	12916055	12934813	+	protein_coding	beat-Vb
FBgn0267733	0.756472	4.87745	30.5527	8.23e-05	0.0424803	chr2R	4782889	4785362	+	lincRNA	CR46064
FBgn0030189	0.755357	4.43513	20.7117	0.000484516	0.100072	chrX	10326463	10328946	+	protein_coding	CG2909
FBgn0029720	0.755288	2.94893	6.65145	0.0222266	0.342287	chrX	4658157	4666700	-	protein_coding	CG3009
FBgn0030259	0.753675	4.15624	5.4835	0.0351109	0.403332	chrX	11057544	11059619	-	protein_coding	CG1545
FBgn0050108	0.753445	2.83517	4.78006	0.0467773	0.446393	chr2R	17669394	17670000	+	protein_coding	CG30108
FBgn0032382	0.748905	3.75266	9.99166	0.00714309	0.22885	chr2L	11849957	11852881	+	protein_coding	Mal-B2
FBgn0030976	0.747471	5.09941	11.8126	0.00415299	0.187794	chrX	18900409	18911843	+	protein_coding	CG7378
FBgn0264950	0.746291	0.948795	4.80786	0.0462286	0.444296	chr2L	8201556	8205298	+	lincRNA	CR44119
FBgn0039644	0.746098	5.12324	10.5829	0.00595951	0.216915	chr3R	29158121	29164966	+	protein_coding	CG11897
FBgn0039925	0.743859	2.653	9.16104	0.00929713	0.253491	chr4	1147465	1169239	+	protein_coding	Kif3C
FBgn0032797	0.740665	6.12988	12.0852	0.00384362	0.182692	chr2L	19508952	19517204	-	protein_coding	CG10186
FBgn0039897	0.739765	4.84173	10.6335	0.00586915	0.216796	chr4	230729	245903	+	protein_coding	CG1674
FBgn0263256	0.7397	4.46326	5.01873	0.0432081	0.433207	chr2L	8145757	8158786	+	protein_coding	CG43394
FBgn0032782	0.738844	3.09622	7.69623	0.0152308	0.296166	chr2L	19432573	19435841	+	protein_coding	Rab9
FBgn0011288	0.737658	5.79514	15.1668	0.00169893	0.136713	chr3L	24074179	24299205	+	protein_coding	Snap25
FBgn0041605	0.737612	7.94788	5.87312	0.0314043	0.385311	chr3R	4280220	4304604	+	protein_coding	cpx
FBgn0040877	0.736701	2.11876	4.65305	0.0493836	0.456382	chrX	17422319	17443994	-	protein_coding	CG12994
FBgn0039380	0.733361	3.66764	4.89155	0.0446224	0.438734	chr3R	25856153	25872670	+	protein_coding	CG5890
FBgn0016694	0.729359	5.03502	13.2372	0.00279875	0.167144	chr3L	7811457	7867369	-	protein_coding	Pdp1
FBgn0032021	0.728965	7.13988	8.98264	0.00993324	0.256575	chr2L	8321279	8325409	-	protein_coding	CG7781
FBgn0033538	0.724935	5.28841	12.2089	0.00371215	0.18233	chr2R	10617661	10641807	+	protein_coding	CG11883
FBgn0031299	0.723381	4.38414	13.883	0.00235807	0.158036	chr2L	1083090	1102504	-	protein_coding	CG4629
FBgn0000038	0.722365	5.49135	8.65183	0.0109891	0.264814	chr3L	4429348	4435993	+	protein_coding	nAChRbeta1
FBgn0051633	0.722254	2.95737	13.7045	0.00247129	0.160717	chr2L	6654759	6656321	-	protein_coding	CG31633
FBgn0029723	0.721216	3.79014	8.24517	0.0126003	0.27655	chrX	4707915	4729487	+	protein_coding	Proc-R
FBgn0039536	0.7182	4.807	5.61338	0.0338818	0.399202	chr3R	27662438	27677099	+	protein_coding	unc80
FBgn0261999	0.717841	3.74131	5.97035	0.0288232	0.37519	chr2L	16231474	16241527	+	protein_coding	CG42817
FBgn0030634	0.713332	3.21054	8.76254	0.0105928	0.261233	chrX	15380370	15385441	-	protein_coding	CG9164
FBgn0028699	0.711358	5.21397	7.96707	0.0138605	0.286919	chr3L	4910367	4920198	+	protein_coding	Rh50
FBgn0031254	0.711041	1.78162	5.03455	0.0420277	0.430841	chr2L	421770	422489	+	protein_coding	CG13692
FBgn0035710	0.708524	6.84016	15.6876	0.0014941	0.135419	chr3L	6689326	6703521	-	protein_coding	SP1173
FBgn0041627	0.708238	4.9083	26.1197	0.000172704	0.0551364	chr2L	15768629	15771159	-	protein_coding	Ku80
FBgn0085425	0.70418	1.67859	6.90355	0.0202449	0.329021	chr2R	21092221	21101453	+	protein_coding	CG34396
FBgn0033945	0.703059	3.49683	11.8617	0.00409524	0.186775	chr2R	14604548	14605297	-	protein_coding	CG12868
FBgn0039170	0.701995	2.28572	7.09623	0.0188685	0.321661	chr3R	24227022	24228538	+	protein_coding	CG13609
FBgn0038202	0.701633	5.80304	9.30079	0.00888696	0.249172	chr3R	14104487	14108321	-	protein_coding	CG12402
FBgn0038260	0.701288	4.78966	6.64812	0.0222543	0.342287	chr3R	14796304	14798474	+	protein_coding	CG14855
FBgn0025814	0.699796	6.0723	24.5714	0.000228393	0.0672871	chrX	21042124	21044107	+	protein_coding	Mgstl
FBgn0032744	0.698678	4.26739	23.5141	0.00027834	0.0714807	chr2L	19043534	19045148	-	protein_coding	Ttc19
FBgn0038752	0.698014	4.55815	10.2968	0.00650141	0.220882	chr3R	19921743	19925371	-	protein_coding	CG4462
FBgn0011774	0.69777	4.56673	14.5661	0.00197657	0.147961	chr3R	11410046	11412440	+	protein_coding	Irbp
FBgn0036294	0.69725	4.84839	8.83954	0.0103269	0.257264	chr3L	12505373	12507840	-	protein_coding	CG10654
FBgn0038143	0.697029	5.12668	10.7779	0.00562002	0.213025	chr3R	13373103	13379775	-	protein_coding	CG9813
FBgn0026737	0.696584	4.98134	26.2689	0.000168215	0.0551364	chr3R	15362795	15363857	-	protein_coding	CG6171
FBgn0260027	0.695935	1.75365	5.62595	0.0330201	0.39469	chr3L	18667360	18668135	+	protein_coding	CG42495
FBgn0038140	0.695026	3.19841	7.03586	0.0192877	0.324088	chr3R	13338329	13345106	+	protein_coding	PK2-R1
FBgn0261625	0.69351	6.56019	9.54789	0.00821193	0.240492	chr2R	12670482	12679593	-	protein_coding	CG42708
FBgn0053527	0.691612	4.8817	7.63154	0.015581	0.299329	chr2R	24577565	24578143	-	protein_coding	SIFa
FBgn0000395	0.688506	5.45402	15.9784	0.00139216	0.132848	chr2R	21355014	21379464	-	protein_coding	cv-2
FBgn0038839	0.688249	6.07584	8.83613	0.010397	0.25822	chr3R	20894451	20897320	-	protein_coding	CG10830
FBgn0035968	0.68778	4.8697	9.26988	0.00897586	0.25017	chr3L	9203064	9208853	-	protein_coding	Slc45-1
FBgn0264606	0.687716	4.84968	5.68038	0.0326722	0.393846	chr3L	2655414	2711690	-	protein_coding	Fife
FBgn0033919	0.685911	6.27508	9.28696	0.00893788	0.249507	chr2R	14261205	14267919	-	protein_coding	CG8547
FBgn0011274	0.685626	4.64767	10.3928	0.00631347	0.220882	chr2L	17413247	17433161	-	protein_coding	Dif
FBgn0034135	0.684173	3.7691	4.80858	0.0462144	0.444296	chr2R	16552257	16558486	+	protein_coding	Syn2
FBgn0265959	0.68408	3.56601	5.90279	0.0295948	0.377931	chr3L	20248079	20265554	+	protein_coding	rdgC
FBgn0030796	0.684076	5.41536	8.44445	0.0117787	0.270894	chrX	16811698	16826494	+	protein_coding	CG4829
FBgn0004575	0.677784	6.4815	5.72426	0.0332561	0.396971	chr3R	10190688	10222442	+	protein_coding	Syn
FBgn0011603	0.677583	3.82109	8.66787	0.0109306	0.264664	chr2L	4467999	4477022	-	protein_coding	ine
FBgn0053516	0.676449	4.04607	11.02	0.00522925	0.208512	chr2L	2058789	2109878	-	protein_coding	dpr3
FBgn0259821	0.67361	4.41659	9.23996	0.00906287	0.250795	chr3R	4077938	4104326	+	protein_coding	CG42402
FBgn0051119	0.671375	2.26998	5.45409	0.0353806	0.405601	chr3R	24854495	24856243	-	protein_coding	HdacX
FBgn0036862	0.667989	5.64727	9.69568	0.00783663	0.238654	chr3L	19281363	19292766	-	protein_coding	Gbs-76A
FBgn0086758	0.66719	7.36314	5.72659	0.0326876	0.393846	chr2L	1651257	1704682	+	protein_coding	chinmo
FBgn0036765	0.666319	3.0677	7.90363	0.0141682	0.287693	chr3L	17879095	17883653	+	protein_coding	CG7408
FBgn0030052	0.66631	7.18743	11.3024	0.0048125	0.201463	chrX	8574305	8588528	+	protein_coding	CG12065
FBgn0029663	0.664251	4.06858	6.53836	0.0231886	0.349091	chrX	3476462	3482322	-	protein_coding	CG10804
FBgn0036126	0.663022	4.46955	10.2327	0.00663044	0.222071	chr3L	11097445	11098186	-	protein_coding	CG6272
FBgn0033504	0.662455	6.17197	8.30726	0.0124242	0.275797	chr2R	10269015	10307024	+	protein_coding	CAP
FBgn0033250	0.657958	6.7257	8.09175	0.0133301	0.284402	chr2R	8009118	8013755	-	protein_coding	CG14762
FBgn0038246	0.656518	5.37694	8.56689	0.0113049	0.268609	chr3R	14609641	14618987	+	protein_coding	CG14853
FBgn0033958	0.656107	5.18517	7.52818	0.0161602	0.303177	chr2R	14739358	14745335	-	protein_coding	CG12858
FBgn0035092	0.655748	7.45127	6.10798	0.0279642	0.372276	chr2R	25032376	25040377	+	protein_coding	Nplp1
FBgn0036713	0.650673	3.73497	5.71666	0.0318488	0.388087	chr3L	17344946	17349666	-	protein_coding	Mip
FBgn0029839	0.649859	3.08882	7.50014	0.0163217	0.304238	chrX	6078707	6081372	-	protein_coding	CG4660
FBgn0085395	0.648907	3.31055	5.90344	0.0295872	0.377931	chr2L	9370308	9415156	-	protein_coding	Shawl
FBgn0029810	0.648743	7.24116	8.83397	0.0103458	0.257313	chrX	5792139	5794543	+	protein_coding	CG12239
FBgn0026439	0.648583	7.12326	10.9682	0.00531024	0.209112	chr2L	9333566	9341925	+	protein_coding	Eaat1
FBgn0035495	0.647474	7.80884	6.39523	0.0247954	0.357721	chr3L	4087580	4092706	+	protein_coding	CG14989
FBgn0039932	0.645227	2.61829	5.89961	0.0296317	0.378026	chr4	962340	978489	-	protein_coding	fuss
FBgn0027296	0.64388	4.85801	9.05919	0.00960988	0.25528	chrX	2260206	2262515	-	protein_coding	temp
FBgn0264745	0.643675	3.00563	5.04636	0.0418215	0.429943	chr2L	3171034	3172799	-	pseudogene	CR44003
FBgn0034567	0.641821	4.43215	5.45305	0.0353955	0.405601	chr2R	20983837	20986500	-	protein_coding	CG15651
FBgn0026415	0.641665	9.20573	12.0929	0.00383529	0.182692	chrX	9927972	9930948	-	protein_coding	Idgf4
FBgn0040382	0.641122	6.9887	12.002	0.00393514	0.183282	chrX	759593	761939	+	protein_coding	CG5273
FBgn0050069	0.639951	6.25558	8.48308	0.0116268	0.270036	chr2R	14185203	14198368	+	protein_coding	CG30069
FBgn0086347	0.639568	6.50976	5.96503	0.0297794	0.378636	chr2L	10491813	10506779	-	protein_coding	Myo31DF
FBgn0038172	0.637915	4.15583	4.86232	0.0451758	0.440287	chr3R	13703083	13705402	-	protein_coding	Adgf-D
FBgn0266719	0.636568	5.32581	12.5806	0.00334715	0.178044	chr3R	25056285	25064348	+	protein_coding	Unc-13-4B
FBgn0085354	0.635117	5.06434	7.79327	0.0147225	0.292275	chrX	16714448	16721411	-	protein_coding	CG34325
FBgn0039770	0.632974	4.27516	8.02501	0.0135863	0.28671	chr3R	30435176	30443599	-	protein_coding	CG15537
FBgn0058470	0.63184	5.69734	5.91764	0.0300045	0.379575	chr3L	23839859	23986410	-	protein_coding	CG40470
FBgn0036942	0.631098	2.2852	5.53352	0.0342657	0.400353	chr3L	20139209	20140607	-	protein_coding	CG7328
FBgn0031306	0.631013	6.89217	6.92435	0.0202558	0.329021	chr2L	1134692	1141156	+	protein_coding	CG4577
FBgn0085417	0.628493	3.82019	8.86679	0.0102346	0.256728	chr3R	14418592	14421865	+	protein_coding	natalisin
FBgn0259736	0.625131	5.54785	11.1782	0.0049909	0.205235	chr3R	22120060	22133367	+	protein_coding	CG42390
FBgn0003082	0.624489	6.24379	17.609	0.000949361	0.122572	chr2R	7825288	7827319	+	protein_coding	phr
FBgn0033810	0.624184	4.57588	8.23691	0.0126357	0.27655	chr2R	13219395	13220251	-	protein_coding	CG4646
FBgn0033358	0.621724	4.97941	6.39452	0.0244834	0.357028	chr2R	8963163	8968184	-	protein_coding	CG8216
FBgn0027552	0.620684	4.90329	7.08974	0.018913	0.321796	chr3L	3941007	3942465	-	protein_coding	CG10863
FBgn0039911	0.619371	5.47622	8.05571	0.0134435	0.285781	chr4	583107	589348	+	protein_coding	CG1909
FBgn0052756	0.619353	4.45078	14.8136	0.00185627	0.141446	chrX	5945681	5948353	+	protein_coding	CG32756
FBgn0053512	0.618615	3.97055	5.39155	0.0362884	0.407544	chr3R	11533482	11542949	-	protein_coding	dpr4
FBgn0004118	0.616637	5.43132	6.77664	0.0212155	0.336821	chr3R	24509227	24515106	-	protein_coding	nAChRbeta2
FBgn0034951	0.615875	4.96821	13.0053	0.00297965	0.170839	chr2R	23992137	23995055	-	protein_coding	CG3860
FBgn0261552	0.615536	6.60283	7.4222	0.0167803	0.307884	chr3R	9417939	9455500	+	protein_coding	ps
FBgn0035023	0.614829	6.60555	13.5566	0.00256994	0.163947	chr2R	24537420	24558961	+	protein_coding	ITP
FBgn0037817	0.611387	4.61463	6.995	0.0195776	0.326091	chr3R	10434788	10436704	+	protein_coding	Cyp12e1
FBgn0038087	0.611242	4.0829	5.15375	0.0399999	0.423618	chr3R	12840559	12848419	-	protein_coding	beat-Va
FBgn0032156	0.608756	6.17449	7.04217	0.0193467	0.32415	chr2L	9903278	9908633	-	protein_coding	CG13124
FBgn0260632	0.60647	5.39677	7.64416	0.015512	0.29833	chr2L	17436829	17450364	-	protein_coding	dl
FBgn0038912	0.606201	4.76598	5.08188	0.0412083	0.427734	chr3R	21875292	21877788	+	protein_coding	CG6656
FBgn0030997	0.604902	4.34994	5.96634	0.0288683	0.375481	chrX	19196057	19201979	-	protein_coding	CG7990
FBgn0015765	0.604619	4.67383	15.4127	0.00159845	0.136713	chr3R	24150415	24152321	-	protein_coding	p38a
FBgn0032048	0.602194	4.62496	6.64169	0.0223078	0.342397	chr2L	8491867	8506845	-	protein_coding	Dh31
FBgn0034731	0.600056	3.90731	5.78387	0.0310125	0.383071	chr2R	22454740	22472995	+	protein_coding	CG10384
FBgn0030723	0.599931	3.97064	7.99275	0.0137382	0.28671	chrX	16063737	16070304	+	protein_coding	dpr18
FBgn0051864	0.599595	4.13478	10.9816	0.00528916	0.209112	chr2L	11995739	11996723	+	protein_coding	Qtzl
FBgn0259222	0.597531	5.04475	4.70838	0.0484565	0.452682	chr3R	20740107	20756639	+	protein_coding	CG42322
FBgn0037345	0.597116	2.96739	4.68004	0.0488157	0.454738	chr3R	5588872	5589703	+	protein_coding	rev7
FBgn0028487	0.596763	4.24276	12.2205	0.00370006	0.18233	chr3R	13695262	13700838	-	protein_coding	f-cup
FBgn0034728	0.595247	5.93995	20.8893	0.000467141	0.0988256	chr2R	22421012	22425482	+	protein_coding	rad50
FBgn0031995	0.594032	6.04923	15.8904	0.00142214	0.132878	chr2L	8190807	8196918	-	protein_coding	CG8475
FBgn0030576	0.593956	4.25358	13.9344	0.00232657	0.157731	chrX	14757530	14765787	-	protein_coding	CG15890
FBgn0263029	0.593738	5.73384	5.86186	0.0302737	0.380512	chr2R	17563605	17564351	+	protein_coding	CG43324
FBgn0030954	0.590287	3.55895	5.87681	0.0298979	0.379557	chrX	18764482	18774027	-	protein_coding	CCKLR-17D3
FBgn0028645	0.588433	3.55153	4.63723	0.0497202	0.456585	chr2L	15905133	15962435	-	protein_coding	beat-Ib
FBgn0034194	0.585739	5.21199	6.34976	0.0249034	0.358425	chr2R	17108843	17114360	+	protein_coding	CG15611
FBgn0000244	0.585409	5.25064	10.0467	0.00702201	0.227071	chr3R	9528237	9533011	-	protein_coding	by
FBgn0005616	0.580334	5.9911	8.37968	0.0120387	0.272758	chr2L	3462217	3466112	-	protein_coding	msl-2
FBgn0033500	0.577712	3.50231	6.18398	0.026534	0.36539	chr2R	10249219	10255495	+	protein_coding	CG12913
FBgn0039927	0.575372	8.00075	7.02757	0.0193461	0.32415	chr4	1126601	1137919	+	protein_coding	CG11155
FBgn0267029	0.573613	2.9529	8.71112	0.0107747	0.263134	chrX	140972	142197	-	lincRNA	CR45473
FBgn0052412	0.572785	4.47669	6.31126	0.0252714	0.359163	chr3L	5900834	5902456	-	protein_coding	QC
FBgn0015221	0.571635	9.1994	11.4652	0.00458978	0.197566	chr3R	30387803	30390584	+	protein_coding	Fer2LCH
FBgn0036770	0.571545	4.55537	5.48907	0.0348844	0.402373	chr3L	17898888	17907812	-	protein_coding	Prestin
FBgn0027513	0.571184	4.18597	5.44464	0.0355161	0.405743	chr2R	8898728	8900211	-	protein_coding	ana2
FBgn0001297	0.570298	7.29166	12.3835	0.00353524	0.180978	chr3R	29765994	29794113	+	protein_coding	kay
FBgn0029833	0.57021	6.96946	11.5584	0.00446755	0.196606	chrX	6037891	6039576	+	protein_coding	CG5941
FBgn0033031	0.570082	5.49134	7.12834	0.0186498	0.320737	chr2R	5668382	5669986	+	protein_coding	CG8245
FBgn0037552	0.569834	4.40269	10.8959	0.0054256	0.211237	chr3R	8217956	8219734	+	protein_coding	CG7800
FBgn0035504	0.568795	4.64517	6.67033	0.0220707	0.342287	chr3L	4174858	4178270	-	protein_coding	Teh4
FBgn0085390	0.567541	4.52429	4.69969	0.0484071	0.452682	chr2R	7834811	7885982	-	protein_coding	Dgk
FBgn0259818	0.565987	4.0444	6.19416	0.0264304	0.364852	chr2L	144230	153300	-	protein_coding	CG42399
FBgn0262524	0.564349	3.70262	6.70375	0.0217975	0.34204	chr3L	12523986	12525150	+	protein_coding	ver
FBgn0041087	0.562265	5.28363	8.61005	0.0111431	0.266405	chr2R	9414341	9417846	+	protein_coding	wun2
FBgn0029881	0.562027	6.55662	5.79766	0.0310226	0.383071	chrX	6600061	6653015	+	protein_coding	pigs
FBgn0265262	0.561182	7.02308	8.32416	0.0122669	0.27404	chr2L	13000769	13004107	-	protein_coding	Vha68-1
FBgn0032805	0.560627	3.9317	10.9995	0.00526112	0.209005	chr2L	19545375	19546959	-	protein_coding	CG10337
FBgn0261113	0.558344	8.60974	16.4982	0.00122926	0.130171	chr3R	18914967	18926989	+	protein_coding	Xrp1
FBgn0031636	0.557647	4.53308	6.03963	0.0280564	0.372276	chr2L	4838346	4841465	+	protein_coding	CG12194
FBgn0032886	0.553187	6.46691	9.69802	0.00783084	0.238654	chr2L	20797714	20814331	+	protein_coding	CG9328
FBgn0037923	0.553099	3.20181	7.18363	0.0182803	0.317805	chr3R	11625050	11626638	-	protein_coding	CG6813
FBgn0002673	0.552622	3.59171	8.10512	0.0132175	0.283031	chr2L	16259413	16261877	-	protein_coding	twe
FBgn0038641	0.550527	5.10495	4.68279	0.0487582	0.454738	chr3R	18680603	18686739	+	protein_coding	CG7708
FBgn0035287	0.546336	5.06583	10.8261	0.00553968	0.212749	chr3L	1876550	1883041	-	protein_coding	CG13937
FBgn0053062	0.541727	2.70027	5.69326	0.0321463	0.390627	chr3L	19441718	19446444	-	protein_coding	CG33062
FBgn0264821	0.540597	5.12068	4.91796	0.0441293	0.436456	chr4	879373	884752	+	lincRNA	CR44029
FBgn0024321	0.537928	5.33708	8.5679	0.011301	0.268609	chr3R	14329412	14372951	-	protein_coding	NK7.1
FBgn0037788	0.537776	6.10792	5.50266	0.0347778	0.402373	chr3R	10112236	10120081	+	protein_coding	CG3940
FBgn0000037	0.534781	4.86393	4.70513	0.0482947	0.452029	chr2R	24378629	24390294	-	protein_coding	mAChR-A
FBgn0031643	0.534438	6.57044	16.8888	0.0011212	0.126316	chr2L	4883297	4885669	+	protein_coding	CG3008
FBgn0005683	0.530042	4.08104	10.9755	0.00529869	0.209112	chr2L	10420624	10422780	-	protein_coding	pie
FBgn0067783	0.528366	3.04072	4.75241	0.0473306	0.448746	chr3R	20552384	20557667	-	protein_coding	att-ORFA
FBgn0037617	0.52205	4.2769	12.712	0.00322813	0.175545	chr3R	8723173	8725357	+	protein_coding	CG8145
FBgn0052195	0.521734	4.46609	6.03055	0.0281555	0.372276	chr3L	18112958	18119150	+	protein_coding	CG32195
FBgn0032001	0.517143	4.50221	7.46415	0.0165316	0.306201	chr2L	8212958	8214135	+	protein_coding	CG8360
FBgn0033889	0.515476	6.15742	6.91008	0.0201964	0.328969	chr2R	13972983	13980165	-	protein_coding	CG6701
FBgn0034117	0.511937	4.99903	4.97198	0.0431404	0.433207	chr2R	16341250	16344182	-	protein_coding	CG7997
FBgn0037141	0.51128	4.83184	10.933	0.00536592	0.210206	chr3L	21938633	21941812	-	protein_coding	DNApol-eta
FBgn0030742	0.509238	6.78335	7.37781	0.0170482	0.308739	chrX	16328436	16330759	-	protein_coding	CG9919
FBgn0034494	0.508828	5.75409	5.03013	0.0421051	0.430841	chr2R	20271652	20274499	-	protein_coding	CG10444
FBgn0027610	0.508514	4.8274	5.33202	0.0371781	0.411349	chr3R	13364937	13369278	+	protein_coding	dic-01
FBgn0034335	0.501692	5.17477	6.2599	0.0257722	0.362028	chr2R	18398392	18399223	+	protein_coding	GstE1
FBgn0004878	0.500297	6.13135	6.16704	0.0267076	0.36539	chr3R	5712974	5716805	-	protein_coding	cas
FBgn0019650	-0.500349	7.17539	5.01125	0.042438	0.43234	chr4	989724	1007922	+	protein_coding	toy
FBgn0025700	-0.501572	7.88238	6.95877	0.0198388	0.326782	chr2L	9917220	9918176	-	protein_coding	CG5885
FBgn0025678	-0.504149	8.66074	10.5524	0.00601477	0.217311	chr2L	16354885	16356735	-	protein_coding	CaBP1
FBgn0032689	-0.506244	7.12569	9.54038	0.00823156	0.240492	chr2L	18599754	18605249	-	protein_coding	CG10413
FBgn0037578	-0.507217	4.59862	8.02285	0.0135964	0.28671	chr3R	8341660	8343516	-	protein_coding	CG9601
FBgn0265177	-0.508818	4.86008	7.1579	0.0184512	0.319172	chr2R	16196383	16196928	+	protein_coding	CG44242
FBgn0000119	-0.509651	7.02806	5.242	0.0385727	0.419899	chr2R	13453639	13483229	-	protein_coding	arr
FBgn0015229	-0.51245	6.56949	5.92878	0.0292951	0.376899	chr3R	21850693	21856266	-	protein_coding	glec
FBgn0264816	-0.514704	5.34897	12.4347	0.00348524	0.180577	chr3R	18403025	18404726	+	protein_coding	koko
FBgn0028369	-0.515917	4.80013	9.80993	0.00756007	0.234838	chrX	2740383	3134532	+	protein_coding	kirre
FBgn0032290	-0.516594	4.80383	14.1895	0.00217727	0.151983	chr2L	10728977	10730302	+	protein_coding	CG6443
FBgn0261284	-0.5175	5.67025	5.5906	0.0334901	0.3985	chrX	6986485	6987188	+	protein_coding	bou
FBgn0005558	-0.520236	5.65225	4.97451	0.0430949	0.433207	chr4	697688	721173	+	protein_coding	ey
FBgn0261270	-0.520541	7.72904	7.81607	0.0146059	0.291107	chr2R	14268771	14270658	-	protein_coding	SelD
FBgn0003312	-0.522809	7.97685	7.22539	0.0180067	0.315924	chr3R	11877234	11879754	+	protein_coding	sad
FBgn0015737	-0.52287	8.10703	12.8872	0.00307691	0.172612	chr3R	27288768	27291592	+	protein_coding	Hmu
FBgn0261563	-0.526132	5.84843	4.64082	0.0499537	0.456842	chr2L	14263026	14328262	+	protein_coding	wb
FBgn0031745	-0.526859	4.13566	6.84884	0.0206569	0.332634	chr2L	5859768	5879498	-	protein_coding	rau
FBgn0004957	-0.528264	5.16536	4.89741	0.0445124	0.438605	chrX	18377520	18379854	-	protein_coding	por
FBgn0010747	-0.529124	7.09351	19.9103	0.000572768	0.102069	chr3L	5152677	5154777	+	protein_coding	Srp54k
FBgn0039714	-0.529277	5.26939	5.17628	0.0396297	0.422972	chr3R	29863700	29868895	-	protein_coding	Zip99C
FBgn0019830	-0.530923	6.27562	7.39524	0.0169424	0.308601	chr2L	2768589	2770069	-	protein_coding	colt
FBgn0031320	-0.531275	5.58506	10.1995	0.0066984	0.222071	chr2L	1182296	1184020	-	protein_coding	CG5126
FBgn0037279	-0.531401	6.27186	21.7904	0.00038929	0.0876352	chr3R	4811443	4816025	+	protein_coding	CG1129
FBgn0037607	-0.531653	8.78818	8.38814	0.0120044	0.272752	chr3R	8667867	8673702	+	protein_coding	CG8036
FBgn0031663	-0.533809	5.2482	5.43212	0.0356964	0.406075	chr2L	4978483	4979379	-	protein_coding	CG8891
FBgn0031779	-0.533875	5.5573	12.2777	0.00364121	0.18233	chr2L	6096697	6098966	-	protein_coding	CG9175
FBgn0036816	-0.53459	6.35466	7.26514	0.0177509	0.313569	chr3L	18828631	18846267	-	protein_coding	Indy
FBgn0261445	-0.534852	6.58505	16.1796	0.00132632	0.132323	chr3L	6959553	6964758	-	protein_coding	sgl
FBgn0262125	-0.537597	8.10227	13.4466	0.00264622	0.163947	chr3R	5649064	5652629	+	protein_coding	Sec23
FBgn0261710	-0.540232	9.62219	9.20527	0.00916498	0.252238	chrX	10461864	10474675	-	protein_coding	nocte
FBgn0041171	-0.541495	7.63217	11.1603	0.00501723	0.205468	chr3L	4246342	4254306	-	protein_coding	ago
FBgn0000463	-0.541646	6.49911	5.57753	0.0337498	0.399066	chr3R	19302730	19326217	-	protein_coding	Dl
FBgn0037890	-0.542102	5.74212	10.572	0.0059791	0.216915	chr3R	11242207	11243999	-	protein_coding	CG17734
FBgn0011016	-0.547364	7.82393	11.3617	0.00472997	0.201463	chr3L	16129616	16130983	+	protein_coding	SsRbeta
FBgn0000411	-0.548128	6.04785	6.83256	0.0207814	0.333593	chr3L	14175609	14178620	-	protein_coding	D
FBgn0038638	-0.549269	6.06115	5.08905	0.04156	0.428762	chr3R	18669389	18674679	+	protein_coding	CG7702
FBgn0031260	-0.550246	7.53906	7.29717	0.0175477	0.312153	chr2L	542785	544653	-	protein_coding	Spp
FBgn0043001	-0.550932	5.64276	8.36238	0.0121093	0.27362	chrX	12017224	12017961	-	protein_coding	Chrac-16
FBgn0000454	-0.552134	7.64972	9.53519	0.00824514	0.240492	chr3R	13782287	13785676	+	protein_coding	Dip-B
FBgn0026417	-0.552466	3.16766	6.52992	0.0232624	0.349091	chr3R	4808335	4812096	-	protein_coding	Hus1-like
FBgn0015239	-0.552498	6.43893	10.2634	0.00656814	0.221788	chr3L	21494018	21497494	-	protein_coding	Hr78
FBgn0008635	-0.553993	8.05215	14.8601	0.00183464	0.140674	chrX	18381548	18385242	-	protein_coding	betaCOP
FBgn0004108	-0.554205	9.43085	5.8481	0.0302371	0.380481	chr3L	16766071	16777465	+	protein_coding	Nrt
FBgn0011817	-0.554422	7.98971	4.79734	0.0467067	0.445962	chr3L	7979045	8054147	+	protein_coding	nmo
FBgn0086254	-0.555742	7.16432	13.7915	0.00241536	0.15932	chr3L	11620534	11624381	-	protein_coding	CG6084
FBgn0003430	-0.556262	4.74548	5.78648	0.0309805	0.383071	chr2L	3825674	3827099	+	protein_coding	slp1
FBgn0266084	-0.558194	5.37746	4.90213	0.0444241	0.43798	chr3L	8753618	8798719	+	protein_coding	Fhos
FBgn0038810	-0.559225	6.68046	25.642	0.000188025	0.0579215	chr3R	20588710	20591040	+	protein_coding	Srp72
FBgn0031098	-0.562241	6.00846	14.4665	0.00202749	0.147961	chrX	20248308	20251093	-	protein_coding	CG17068
FBgn0031107	-0.563416	7.2113	8.35132	0.0121547	0.27362	chrX	20394394	20412247	+	protein_coding	HERC2
FBgn0026239	-0.567341	7.42242	12.9487	0.00302584	0.170839	chr3R	18984024	19022436	+	protein_coding	gukh
FBgn0030038	-0.568743	7.35902	16.8849	0.00112223	0.126316	chrX	8437056	8441264	+	protein_coding	CG1440
FBgn0032895	-0.573832	5.24063	5.2014	0.0392217	0.422512	chr2L	20852577	20857113	+	protein_coding	twit
FBgn0034858	-0.574345	6.36846	16.9711	0.00109985	0.126316	chr2R	23386520	23389052	+	protein_coding	eIF2B-delta
FBgn0036801	-0.574439	4.93331	5.92504	0.029338	0.376899	chr3L	18625958	18667177	+	protein_coding	MYPT-75D
FBgn0052227	-0.57474	6.70578	6.93446	0.0200164	0.327914	chr3L	20268858	20295133	-	protein_coding	gogo
FBgn0086357	-0.57914	9.44757	12.0471	0.00388522	0.182867	chr2L	6477181	6480575	-	protein_coding	Sec61alpha
FBgn0262126	-0.579559	7.46255	10.4559	0.00619337	0.219253	chr2L	2231105	2236844	-	protein_coding	Sec24CD
FBgn0010452	-0.579759	7.22712	9.77946	0.00763269	0.235955	chr3L	13114270	13118077	+	protein_coding	trn
FBgn0025739	-0.579817	6.11513	8.87956	0.0101917	0.256728	chrX	4636317	4639112	+	protein_coding	pon
FBgn0052677	-0.580053	6.68504	6.07207	0.0278929	0.372276	chrX	10627736	10710947	+	protein_coding	X11Lbeta
FBgn0027496	-0.58055	6.43246	6.99094	0.0196066	0.326091	chr2L	6489089	6490194	+	protein_coding	epsilonCOP
FBgn0044823	-0.581074	4.76148	8.12504	0.0131276	0.281794	chr3R	5616643	5624125	-	protein_coding	Spec2
FBgn0045842	-0.581997	4.4966	4.66734	0.0490819	0.455268	chr2L	15257266	15264692	-	protein_coding	yuri
FBgn0034093	-0.584877	5.02691	7.74678	0.0149635	0.294203	chr2R	16223217	16230680	-	protein_coding	CG15706
FBgn0037156	-0.585265	3.82474	5.09783	0.0409365	0.42659	chr3L	22265805	22266679	-	protein_coding	CG11523
FBgn0026319	-0.585397	6.41824	6.3232	0.0253347	0.359331	chr2L	4361924	4380716	+	protein_coding	Traf4
FBgn0263852	-0.588617	6.41908	7.90963	0.0141388	0.287693	chr2L	8383611	8384137	-	protein_coding	l(2)k12914
FBgn0069242	-0.589428	5.98395	8.10963	0.0131971	0.282939	chr3R	9684468	9685476	-	protein_coding	eca
FBgn0039356	-0.591674	2.58881	7.242	0.0178993	0.315011	chr3R	25678682	25679529	+	protein_coding	CG5039
FBgn0027571	-0.591731	8.12945	9.61487	0.00803932	0.239629	chr2L	3056597	3068177	+	protein_coding	CG3523
FBgn0030680	-0.593801	5.71513	14.4408	0.00204089	0.147961	chrX	15741342	15746231	-	protein_coding	CG8944
FBgn0002733	-0.596956	5.81233	6.46925	0.0238005	0.352372	chr3R	26005045	26006023	-	protein_coding	E(spl)mbeta-HLH
FBgn0031717	-0.598675	6.00779	13.5103	0.00260172	0.163947	chr2L	5547085	5549614	+	protein_coding	Oscillin
FBgn0036919	-0.598801	6.90013	11.1443	0.00504084	0.205468	chr3L	19924942	19927175	+	protein_coding	Grasp65
FBgn0020386	-0.600386	6.91805	11.3403	0.00475953	0.201463	chr3L	129449	145895	+	protein_coding	Pdk1
FBgn0002609	-0.600677	5.25617	5.65288	0.0326672	0.393846	chr3R	26021822	26023127	+	protein_coding	E(spl)m3-HLH
FBgn0083123	-0.601616	4.76764	5.75712	0.0313423	0.385311	chr2R	14621600	14624498	+	lincRNA	Uhg5
FBgn0034070	-0.604402	6.94803	6.38583	0.0246977	0.357193	chr2R	16031929	16047243	+	protein_coding	SP2353
FBgn0035121	-0.60457	9.3547	15.8452	0.00143782	0.132878	chr3L	259042	264380	-	protein_coding	Tudor-SN
FBgn0032871	-0.604582	3.33257	5.75514	0.0313668	0.385311	chr2L	20650188	20650898	+	protein_coding	CG2611
FBgn0003090	-0.607186	6.83404	7.65777	0.0154379	0.298304	chr2R	7150702	7223378	+	protein_coding	pk
FBgn0035980	-0.608191	3.15732	7.35249	0.0172032	0.309211	chr3L	9364349	9365240	+	protein_coding	CG4447
FBgn0000210	-0.611237	9.83254	6.61432	0.0225373	0.342626	chrX	1575131	1664869	+	protein_coding	br
FBgn0011705	-0.611637	5.63073	14.2215	0.00215932	0.151983	chr2L	8985935	8989539	-	protein_coding	rost
FBgn0039562	-0.612482	9.77475	17.5037	0.00097248	0.123738	chr3R	27948710	27952151	+	protein_coding	Gp93
FBgn0004647	-0.612878	8.21983	4.72677	0.0488711	0.454738	chrX	3134869	3172221	+	protein_coding	N
FBgn0037718	-0.615344	6.83985	15.3498	0.00162349	0.136713	chr3R	9586941	9589581	+	protein_coding	P58IPK
FBgn0021795	-0.615479	8.12699	13.3624	0.00270634	0.16506	chr2R	11370299	11371335	-	protein_coding	Tapdelta
FBgn0031488	-0.615671	5.31407	5.99024	0.0286006	0.374516	chr2L	2999285	3016069	+	protein_coding	CG17265
FBgn0260857	-0.616169	4.52295	10.2393	0.00661706	0.222071	chr3L	19261393	19262437	+	protein_coding	Bet1
FBgn0000097	-0.61767	7.32592	6.62406	0.0224553	0.342626	chr2L	2156483	2178754	-	protein_coding	aop
FBgn0036194	-0.618869	5.84061	14.5463	0.00198658	0.147961	chr3L	11693878	11696963	-	protein_coding	CG11652
FBgn0045761	-0.61966	5.45351	6.33604	0.0250338	0.358576	chr3R	25323155	25329316	-	protein_coding	CHKov1
FBgn0038535	-0.622713	8.91032	17.9259	0.0008835	0.12021	chr3R	17673731	17682515	-	protein_coding	alt
FBgn0034753	-0.624611	10.4528	19.6104	0.000610455	0.102341	chr2R	22644645	22646344	-	protein_coding	CG2852
FBgn0010591	-0.62742	6.07911	13.8683	0.00236713	0.15804	chr2R	17088440	17091958	-	protein_coding	Sply
FBgn0265192	-0.629414	6.53142	16.4233	0.00125131	0.130171	chr2R	22060949	22069757	+	protein_coding	Snp
FBgn0085370	-0.629958	6.04052	12.7108	0.00322917	0.175545	chr2L	18532024	18590342	-	protein_coding	Pde11
FBgn0033638	-0.631187	6.5247	7.65528	0.0154767	0.298304	chr2R	11619478	11640941	-	protein_coding	CG9005
FBgn0038110	-0.63365	6.28113	27.2352	0.00014219	0.050116	chr3R	13008383	13011310	-	protein_coding	CG8031
FBgn0052280	-0.635919	5.77588	12.5677	0.00335905	0.178044	chr3L	3165180	3169080	+	protein_coding	CG32280
FBgn0038808	-0.636442	5.13176	9.57434	0.00814328	0.239629	chr3R	20580114	20580764	+	protein_coding	Srp14
FBgn0030930	-0.637209	6.98164	7.45531	0.0165836	0.306649	chrX	18495066	18499986	-	protein_coding	GalNAc-T2
FBgn0004364	-0.640268	6.94754	8.18765	0.0128496	0.279241	chr2R	20111510	20116932	+	protein_coding	18w
FBgn0031980	-0.64139	9.7032	5.43139	0.0364292	0.407946	chr2L	8041872	8042909	-	protein_coding	RpL36A
FBgn0261239	-0.646135	6.6649	8.89211	0.0101498	0.256575	chr2L	21237249	21259675	+	protein_coding	Hr39
FBgn0002973	-0.647319	7.2053	13.7517	0.00244074	0.15932	chr2L	9437468	9464184	+	protein_coding	numb
FBgn0029082	-0.649631	6.63673	8.95551	0.00994088	0.256575	chr2R	15011395	15042134	+	protein_coding	hbs
FBgn0000109	-0.650962	3.38211	7.09262	0.0188932	0.321771	chr3L	1883794	1885019	-	protein_coding	Aprt
FBgn0024836	-0.6512	7.93856	5.96667	0.0294682	0.377412	chr2R	10673344	10721138	+	protein_coding	stan
FBgn0033548	-0.653682	4.10092	5.17124	0.0397122	0.422972	chr2R	10810555	10810936	-	protein_coding	CG7637
FBgn0000547	-0.655083	8.61603	4.84168	0.0469288	0.44711	chr2L	4031376	4115749	+	protein_coding	ed
FBgn0034705	-0.655375	4.29447	15.9657	0.00139645	0.132848	chr2R	22177418	22182879	-	protein_coding	CG11170
FBgn0034045	-0.656265	2.3333	4.81096	0.0461678	0.444296	chr2R	15842759	15847362	-	protein_coding	CG8249
FBgn0024841	-0.659743	5.42408	7.41674	0.016813	0.308162	chr3R	29723162	29724226	+	protein_coding	Pcd
FBgn0005658	-0.661331	6.08296	5.21546	0.040723	0.425122	chr3L	6097616	6123913	+	protein_coding	Ets65A
FBgn0020621	-0.662945	7.21345	11.3229	0.00478371	0.201463	chr2R	9252309	9285097	-	protein_coding	Pkn
FBgn0261801	-0.664608	5.59181	10.7497	0.00566775	0.213105	chr3L	6400589	6485964	+	protein_coding	CG42747
FBgn0261648	-0.668138	5.06828	18.1913	0.000832355	0.116923	chr2L	11434310	11445614	-	protein_coding	salm
FBgn0051038	-0.67006	6.20199	10.6762	0.00579423	0.215097	chr3R	29877058	29903231	+	protein_coding	CG31038
FBgn0035260	-0.672004	5.39983	7.99735	0.0137164	0.28671	chr3L	1674708	1715541	+	protein_coding	CG7991
FBgn0039294	-0.672634	3.06542	9.33739	0.00878303	0.248343	chr3R	25224155	25232321	-	protein_coding	Cad96Cb
FBgn0038720	-0.672678	4.78911	8.76292	0.0105914	0.261233	chr3R	19616023	19632718	-	protein_coding	CG6231
FBgn0029858	-0.673062	3.91399	12.9766	0.00300293	0.170839	chrX	6291302	6294177	+	protein_coding	CG15896
FBgn0038981	-0.67336	5.90638	15.3191	0.00163587	0.136713	chr3R	22520086	22528663	-	protein_coding	CG5346
FBgn0037440	-0.676871	5.62646	11.8064	0.00416037	0.187794	chr3R	6371025	6376044	-	protein_coding	CG1041
FBgn0002543	-0.678563	6.11218	12.2303	0.00368987	0.18233	chr2L	1380085	1420453	-	protein_coding	lea
FBgn0030805	-0.681641	5.25543	4.79076	0.0479114	0.451196	chrX	16938243	16940873	-	protein_coding	wus
FBgn0037623	-0.682416	6.99241	7.37858	0.0173894	0.310871	chr3R	8735878	8747675	-	protein_coding	CG9801
FBgn0260942	-0.686526	3.79066	6.11626	0.0272359	0.368156	chr3R	22550679	22556494	+	protein_coding	bond
FBgn0035643	-0.686668	3.93451	5.41046	0.036011	0.406112	chr3L	5882303	5884090	+	protein_coding	CG13287
FBgn0010638	-0.686696	8.27209	11.4593	0.00459754	0.197566	chr2R	14618770	14619681	+	protein_coding	Sec61beta
FBgn0051676	-0.687572	6.02283	7.68617	0.0156728	0.300435	chr2L	20840749	20849182	+	protein_coding	CG31676
FBgn0041630	-0.690616	6.84299	9.1101	0.00945206	0.254163	chr3L	4288640	4291211	+	protein_coding	Hexo1
FBgn0259735	-0.690932	7.14633	8.24633	0.012647	0.27655	chr2L	16545015	16663218	+	protein_coding	CG42389
FBgn0085369	-0.69103	4.91737	8.69185	0.0108439	0.264133	chr2L	3662744	3692114	+	protein_coding	CG34340
FBgn0010504	-0.693495	4.06999	7.88529	0.0142586	0.287703	chr2R	8146917	8156654	-	protein_coding	kermit
FBgn0035699	-0.696157	6.10775	10.0213	0.00707766	0.227613	chr3L	6329323	6352390	-	protein_coding	CG13300
FBgn0004569	-0.698739	5.30391	15.0977	0.00172847	0.137955	chr3L	16470385	16483650	-	protein_coding	aos
FBgn0038198	-0.699481	4.93527	8.67398	0.0109084	0.264664	chr3R	14089516	14092425	+	protein_coding	Npc2b
FBgn0028468	-0.6998	4.88176	11.6855	0.00430693	0.19124	chr3R	21108445	21110834	+	protein_coding	rtet
FBgn0011227	-0.70167	4.10492	9.20913	0.00915355	0.252238	chr2R	12757132	12757529	-	protein_coding	ox
FBgn0052069	-0.702027	3.89027	8.12716	0.013118	0.281794	chr3L	11062130	11062614	-	protein_coding	CG32069
FBgn0033421	-0.704331	4.82932	19.062	0.000686994	0.107705	chr2R	9541946	9548135	-	protein_coding	CG1888
FBgn0036000	-0.704965	5.31713	18.6347	0.000754321	0.112247	chr3L	9459368	9460799	-	protein_coding	CG3434
FBgn0003892	-0.706352	6.63925	5.36212	0.0387507	0.420368	chr2R	8649648	8665223	+	protein_coding	ptc
FBgn0031378	-0.710207	2.62214	6.80282	0.021011	0.335393	chr2L	1981175	1982099	+	protein_coding	CG15362
FBgn0035880	-0.712009	2.65164	4.98093	0.0429792	0.433207	chr3L	8352354	8356296	-	protein_coding	CG17352
FBgn0005677	-0.722485	7.58199	6.29007	0.0265293	0.36539	chr2L	16466511	16485998	-	protein_coding	dac
FBgn0023095	-0.724831	6.57312	19.9457	0.000568502	0.102069	chr3L	13228691	13279642	+	protein_coding	caps
FBgn0011204	-0.724981	5.91571	10.3101	0.00647482	0.220882	chr3L	1503225	1517271	-	protein_coding	cue
FBgn0025360	-0.726256	5.347	15.6661	0.00150198	0.135419	chr2R	8031282	8042529	+	protein_coding	Optix
FBgn0263934	-0.73042	6.69966	16.3387	0.00127678	0.131105	chr2R	7086315	7127868	+	protein_coding	esn
FBgn0038341	-0.735428	6.40577	9.87834	0.00750015	0.233917	chr3R	15442245	15476193	-	protein_coding	AdamTS-A
FBgn0005612	-0.735912	6.35496	7.71046	0.0158904	0.301643	chr2R	23978800	23985177	+	protein_coding	Sox14
FBgn0038830	-0.745794	5.45894	30.419	8.4e-05	0.0424803	chr3R	20823312	20824239	-	protein_coding	CG17272
FBgn0035648	-0.746154	1.95939	6.37239	0.02469	0.357193	chr3L	5907380	5917540	+	protein_coding	CG13288
FBgn0023529	-0.746278	8.54223	24.198	0.000244755	0.0682168	chrX	2271007	2275068	-	protein_coding	CG2918
FBgn0039283	-0.748015	5.70887	18.9504	0.000703885	0.109376	chr3R	25138071	25139903	+	protein_coding	danr
FBgn0037290	-0.748896	4.21744	8.8865	0.0101685	0.256575	chr3R	4965444	4968485	+	protein_coding	CG1124
FBgn0039227	-0.749116	6.64223	17.2631	0.0010278	0.125894	chr3R	24799966	24805259	-	protein_coding	polybromo
FBgn0040340	-0.751887	7.79177	6.51013	0.024542	0.357028	chrX	935231	937822	+	protein_coding	TRAM
FBgn0037875	-0.754286	6.32074	14.9723	0.00178361	0.139193	chr3R	11212307	11214539	-	protein_coding	ZnT86D
FBgn0036152	-0.763842	3.33083	5.99459	0.0285521	0.374516	chr3L	11287935	11295919	-	protein_coding	CG6175
FBgn0264746	-0.76385	2.68444	7.37988	0.0170356	0.308739	chr3L	18072361	18073863	-	protein_coding	CG44004
FBgn0052512	-0.764297	5.30182	20.4755	0.000508792	0.100997	chrX	21062276	21067540	-	protein_coding	CG32512
FBgn0036667	-0.767584	4.95519	6.55919	0.0236149	0.350511	chr3L	16844567	16844991	-	protein_coding	CG9669
FBgn0029123	-0.767854	8.00304	4.78856	0.0494261	0.456535	chr2L	8825644	8829670	+	protein_coding	SoxN
FBgn0038461	-0.769111	4.68045	18.7561	0.00073446	0.112247	chr3R	16990333	16991878	-	protein_coding	CG3678
FBgn0036931	-0.769531	1.45681	5.2986	0.0376888	0.415428	chr3L	20024686	20027835	-	protein_coding	CG14183
FBgn0053200	-0.770643	2.71069	4.85214	0.0453705	0.441396	chr2R	22408524	22409342	+	protein_coding	ventrally-expressed-protein-D
FBgn0026144	-0.782101	7.02502	12.9645	0.00301287	0.170839	chrX	7337351	7342731	+	protein_coding	CBP
FBgn0051072	-0.78326	5.47312	6.69647	0.0229129	0.346536	chr3R	26842461	26863130	-	protein_coding	Lerp
FBgn0004839	-0.784347	7.67244	11.0865	0.0051275	0.206654	chr2R	12001472	12019846	-	protein_coding	otk
FBgn0050344	-0.787393	5.3869	10.5133	0.00608641	0.218162	chr2R	9145259	9148512	+	protein_coding	CG30344
FBgn0039241	-0.790911	6.99237	5.44737	0.0380598	0.416641	chr3R	24877044	24881478	+	protein_coding	CG11089
FBgn0001224	-0.794123	10.6921	13.1312	0.00287977	0.169059	chr3L	9381881	9382765	+	protein_coding	Hsp23
FBgn0031381	-0.796893	7.05626	9.08103	0.00995568	0.256575	chr2L	1988289	1988940	+	protein_coding	Npc2a
FBgn0032614	-0.79832	2.83793	4.92997	0.0439071	0.435814	chr2L	16842299	16848716	-	protein_coding	CG13284
FBgn0029804	-0.80017	4.53194	7.08305	0.0191906	0.323759	chrX	5765854	5770780	-	protein_coding	CG3097
FBgn0030408	-0.800232	2.44822	5.23961	0.0386105	0.41995	chrX	12616315	12621216	+	protein_coding	CG11085
FBgn0039637	-0.803805	7.06205	6.48894	0.0253024	0.359163	chr3R	29123369	29128247	+	protein_coding	CG11880
FBgn0032123	-0.810951	5.98387	10.743	0.0058664	0.216796	chr2L	9521209	9540060	+	protein_coding	Oatp30B
FBgn0031741	-0.812745	2.22708	5.20262	0.039202	0.422512	chr2L	5805394	5809063	+	protein_coding	CG11034
FBgn0001142	-0.815343	7.53686	10.6049	0.00600779	0.217311	chr2L	132076	134472	+	protein_coding	Gs1
FBgn0001218	-0.816083	10.5515	14.2428	0.00214751	0.151983	chrX	11801695	11807117	-	protein_coding	Hsc70-3
FBgn0050156	-0.818159	2.13023	7.11557	0.0187365	0.321283	chr2R	6981445	6985712	-	protein_coding	CG30156
FBgn0000024	-0.820629	7.69417	5.13843	0.0431989	0.433207	chr3R	13222950	13259517	-	protein_coding	Ace
FBgn0037838	-0.820743	3.6064	7.1485	0.0185141	0.319566	chr3R	10815287	10817490	+	protein_coding	CG4089
FBgn0035445	-0.821126	4.46081	12.2279	0.00369242	0.18233	chr3L	3378267	3380083	+	protein_coding	CG12014
FBgn0050338	-0.82506	1.95371	8.44289	0.0117849	0.270894	chr2R	9594044	9599505	+	protein_coding	CG30338
FBgn0031264	-0.825449	3.42009	5.67958	0.0323217	0.391568	chr2L	560567	563819	-	protein_coding	CG11835
FBgn0032449	-0.826153	3.92898	12.1477	0.00377653	0.18233	chr2L	12698917	12700746	-	protein_coding	CG17036
FBgn0038396	-0.826256	4.1568	17.848	0.000899177	0.12021	chr3R	16049669	16050693	+	protein_coding	CG5013
FBgn0259162	-0.827273	2.34778	5.13635	0.0402886	0.424117	chrX	20538496	20567097	+	protein_coding	RunxB
FBgn0019952	-0.82838	6.0057	10.1523	0.00715523	0.22885	chr3R	24276259	24278792	+	protein_coding	Orct
FBgn0002633	-0.831216	5.00196	13.7763	0.002425	0.15932	chr3R	26037037	26038019	+	protein_coding	E(spl)m7-HLH
FBgn0035976	-0.838867	4.24659	5.89985	0.0303599	0.380525	chr3L	9338809	9348336	+	protein_coding	PGRP-LC
FBgn0016054	-0.841038	2.96819	10.7653	0.00564136	0.213025	chr2L	20643350	20645791	-	protein_coding	phr6-4
FBgn0030884	-0.854466	3.90549	7.7052	0.015183	0.295564	chrX	17911461	17924163	+	protein_coding	CG6847
FBgn0041160	-0.867644	3.99712	10.2831	0.00652872	0.220882	chr3L	15697593	15699850	-	protein_coding	comm2
FBgn0037999	-0.86775	4.44647	8.91186	0.0100842	0.256575	chr3R	12219880	12221464	-	protein_coding	CG4860
FBgn0032713	-0.870118	4.76007	19.9976	0.000562311	0.102069	chr2L	18823547	18826716	+	protein_coding	CG17323
FBgn0036249	-0.872106	4.5845	28.11	0.000122554	0.0495225	chr3L	12120018	12121185	+	protein_coding	CG11560
FBgn0035449	-0.872212	5.21019	13.8856	0.00235645	0.158036	chr3L	3468022	3471309	-	protein_coding	CG14971
FBgn0032377	-0.874885	1.4017	6.23603	0.0260089	0.363029	chr2L	11792411	11794086	-	protein_coding	CG14937
FBgn0038321	-0.879068	6.68422	11.7122	0.00453214	0.19698	chr3R	15337907	15343256	-	protein_coding	CG6218
FBgn0004403	-0.885575	10.1641	10.3713	0.00665747	0.222071	chrX	7933741	7934677	+	protein_coding	RpS14a
FBgn0014002	-0.893224	10.489	17.7025	0.000929352	0.122229	chr3L	15137737	15142840	-	protein_coding	Pdi
FBgn0039099	-0.893582	4.59415	11.6807	0.00431295	0.19124	chr3R	23678894	23679855	+	protein_coding	GILT2
FBgn0039286	-0.895798	5.3875	30.2192	8.68e-05	0.0424803	chr3R	25184382	25192806	+	protein_coding	dan
FBgn0040392	-0.896376	1.89818	9.24537	0.00904706	0.250795	chrX	2324747	2326217	-	protein_coding	CG14050
FBgn0030653	-0.905929	6.0246	10.6309	0.00638822	0.220882	chrX	15568992	15570369	+	protein_coding	CG7860
FBgn0034354	-0.906018	5.7048	6.28266	0.028081	0.372276	chr2R	18503607	18505025	+	protein_coding	GstE11
FBgn0036846	-0.911954	6.22224	19.2855	0.000654533	0.10544	chr3L	19092669	19094760	+	protein_coding	MESR6
FBgn0038071	-0.917488	7.72781	27.099	0.000145562	0.050116	chr3R	12648057	12652910	+	protein_coding	Dtg
FBgn0035308	-0.926967	4.65727	6.92582	0.0213414	0.337483	chr3L	2153200	2163863	-	protein_coding	CG15822
FBgn0036287	-0.928313	1.49448	5.64455	0.0327759	0.393846	chr3L	12474417	12485035	-	protein_coding	CG10663
FBgn0039593	-0.930108	4.12244	8.33669	0.012267	0.27404	chr3R	28670703	28672021	+	protein_coding	CG9989
FBgn0014427	-0.930445	6.40873	18.2474	0.000821989	0.116503	chr3R	29200453	29201770	+	protein_coding	CG11899
FBgn0086704	-0.93063	1.67067	7.73284	0.0150367	0.294203	chr3R	31158155	31169106	-	protein_coding	stops
FBgn0040391	-0.932519	0.253085	4.63889	0.0496845	0.456585	chrX	2327127	2328941	+	protein_coding	CG2854
FBgn0001083	-0.933146	4.97548	5.55534	0.0366138	0.408971	chrX	11992914	12003914	-	protein_coding	fw
FBgn0036975	-0.939327	3.68785	10.9674	0.00531146	0.209112	chr3L	20353448	20356632	+	protein_coding	CG5618
FBgn0003366	-0.940794	6.67505	14.1719	0.00232095	0.157731	chrX	11071440	11086299	-	protein_coding	sev
FBgn0000216	-0.943341	4.49903	6.48272	0.02512	0.358848	chr3L	14972666	14973198	+	protein_coding	Brd
FBgn0037835	-0.943781	4.87927	9.6569	0.00828741	0.240925	chr3R	10792903	10793643	+	protein_coding	CG14687
FBgn0263967	-0.972603	1.4942	7.2841	0.0176303	0.312153	chr2R	7492363	7493497	+	lincRNA	CR43723
FBgn0037378	-0.977988	5.67579	16.6676	0.00118097	0.128004	chr3R	5793307	5794317	-	protein_coding	CG2046
FBgn0033942	-0.987383	4.03358	13.4586	0.00263775	0.163947	chr2R	14512558	14515211	-	protein_coding	Cpr51A
FBgn0032350	-1.00379	7.47148	21.4181	0.000419488	0.0920725	chr2L	11151505	11155721	-	protein_coding	CG6287
FBgn0003285	-1.00873	6.32064	20.2453	0.000533797	0.101221	chrX	2950398	2973834	-	protein_coding	rst
FBgn0040153	-1.01499	5.52385	5.68208	0.0358518	0.406075	chrX	14203960	14211457	-	protein_coding	l(1)G0469
FBgn0027578	-1.02279	4.15923	8.88347	0.0105145	0.260033	chr3R	28883692	28886015	+	protein_coding	CG14526
FBgn0033668	-1.02528	3.70998	5.50826	0.0358281	0.406075	chr2R	11939556	11967435	+	protein_coding	CG13188
FBgn0262945	-1.03275	2.75433	10.3741	0.00634946	0.220882	chrX	5831897	5832215	-	lincRNA	CR43264
FBgn0030114	-1.03614	7.28952	20.6981	0.000485877	0.100072	chrX	9250419	9255953	+	protein_coding	CG17754
FBgn0087007	-1.03796	7.19141	11.8917	0.00457306	0.197566	chr3L	14412827	14536276	-	protein_coding	bbg
FBgn0034021	-1.03833	4.83912	13.4559	0.00268853	0.16506	chr2R	15472174	15482834	-	protein_coding	CG8180
FBgn0000008	-1.05336	5.3296	10.7605	0.00625848	0.220787	chr2R	22136967	22172834	+	protein_coding	a
FBgn0003460	-1.05502	5.19916	10.5984	0.00650145	0.220882	chr2R	7419349	7434872	+	protein_coding	so
FBgn0035091	-1.07354	3.5004	8.16487	0.0129499	0.280116	chr2R	24986043	24990489	+	protein_coding	CG3829
FBgn0035999	-1.07382	4.20203	46.8167	9.28e-06	0.012769	chr3L	9456317	9459370	+	protein_coding	CG3552
FBgn0039640	-1.07542	5.70303	17.0332	0.00116116	0.128004	chr3R	29138661	29145787	+	protein_coding	CG14516
FBgn0038151	-1.07957	2.03873	8.90342	0.0101121	0.256575	chr3R	13405108	13406998	-	protein_coding	yellow-e2
FBgn0034321	-1.08112	-0.231026	6.34124	0.0249842	0.358576	chr2R	18288695	18294712	+	protein_coding	CG14502
FBgn0040491	-1.08228	1.95016	4.77302	0.0469174	0.44711	chr2R	11679491	11688557	+	protein_coding	Buffy
FBgn0030051	-1.09445	4.23769	7.20989	0.0195233	0.325555	chrX	8571098	8573593	-	protein_coding	spirit
FBgn0054038	-1.09455	2.04753	5.43502	0.0356546	0.406075	chr2R	25167658	25169855	+	protein_coding	CG34038
FBgn0263117	-1.09631	7.33247	11.6693	0.00498547	0.205235	chr3R	22308662	22324094	-	protein_coding	CG34377
FBgn0035948	-1.09973	-0.343922	8.01097	0.0136522	0.28671	chr3L	8977394	8979880	-	protein_coding	CG5644
FBgn0034253	-1.10382	5.46226	5.71675	0.0357934	0.406075	chr2R	17604950	17639138	-	protein_coding	CG10936
FBgn0034647	-1.10617	1.23015	4.84151	0.0455747	0.442614	chr2R	21660966	21662995	-	protein_coding	pirk
FBgn0261274	-1.11094	5.34108	8.06769	0.0152795	0.296551	chr3L	4170403	4173789	+	protein_coding	Ero1L
FBgn0004854	-1.1127	4.33673	13.7794	0.00242304	0.15932	chrX	17314580	17324175	+	protein_coding	B-H2
FBgn0025776	-1.11426	-0.0381921	5.16627	0.0397936	0.422972	chr3L	15042798	15043924	-	protein_coding	ind
FBgn0051176	-1.11526	2.82337	9.03986	0.00967061	0.256432	chr3R	21672302	21719660	-	protein_coding	CG31176
FBgn0038462	-1.1254	4.53959	45.8168	1.04e-05	0.012769	chr3R	16994541	16996071	-	protein_coding	CG17556
FBgn0029128	-1.13012	6.60576	7.55405	0.018853	0.321661	chrX	142207	200663	+	protein_coding	tyn
FBgn0263038	-1.1501	3.11525	5.65923	0.0332815	0.397004	chr2L	14163507	14180686	-	protein_coding	CG43333
FBgn0013810	-1.15036	0.95937	8.27314	0.012481	0.275803	chr2L	17501400	17525515	+	protein_coding	Dhc36C
FBgn0002629	-1.15211	5.57886	18.3015	0.000880772	0.12021	chr3R	26023820	26024579	-	protein_coding	E(spl)m4-BFM
FBgn0031097	-1.16068	6.73016	5.89307	0.0342938	0.400353	chrX	20239854	20243209	+	protein_coding	obst-A
FBgn0029531	-1.16154	-0.371489	4.96547	0.0432582	0.433207	chrX	749240	751301	-	protein_coding	CG13362
FBgn0037164	-1.16724	3.68744	5.47667	0.0371196	0.411349	chr3L	22465618	22468076	+	protein_coding	CG11438
FBgn0036999	-1.16911	4.3804	13.2505	0.00290766	0.169059	chr3L	20474465	20477003	+	protein_coding	isoQC
FBgn0035767	-1.17004	5.17504	16.1518	0.00143407	0.132878	chr3L	7341883	7345183	-	protein_coding	CG8596
FBgn0004885	-1.17691	7.05727	50.1405	6.4e-06	0.0102172	chr3R	24719696	24749125	+	protein_coding	tok
FBgn0265187	-1.18545	2.18579	7.53681	0.0161109	0.303177	chr2R	23055473	23061549	+	protein_coding	CG44252
FBgn0083978	-1.18866	5.56043	6.20925	0.0302495	0.380481	chr3L	13028961	13036504	+	protein_coding	CG17672
FBgn0266709	-1.19023	1.54277	7.88273	0.0142713	0.287703	chr3L	13024762	13026437	-	protein_coding	Zmynd10
FBgn0264361	-1.19224	0.0934866	7.54039	0.0160905	0.303177	chr2L	12343642	12344266	-	protein_coding	CG43813
FBgn0024943	-1.19325	-0.366224	5.00316	0.0425817	0.432396	chrX	8525386	8529698	-	protein_coding	PIP82
FBgn0035104	-1.19371	1.92423	8.03779	0.0135267	0.28661	chr3L	179922	182535	+	protein_coding	CG13875
FBgn0002567	-1.19516	4.20017	18.2434	0.00082273	0.116503	chr2R	9177863	9186342	-	protein_coding	ltd
FBgn0004795	-1.19634	4.76029	5.88451	0.0334977	0.3985	chr2R	23632609	23654820	+	protein_coding	retn
FBgn0053169	-1.19672	2.74459	6.24013	0.0259681	0.363029	chr3L	22863863	22864496	+	protein_coding	CG33169
FBgn0034928	-1.20412	1.19486	4.6423	0.049612	0.456585	chr2R	23903749	23905269	+	protein_coding	CG13562
FBgn0265059	-1.21173	-0.848308	6.93755	0.0199937	0.327914	chr2R	6979495	6980195	+	lincRNA	CR44170
FBgn0035998	-1.21641	2.31843	17.8778	0.000893155	0.12021	chr3L	9456341	9457669	-	protein_coding	CG3437
FBgn0033438	-1.21861	7.99199	37.4236	3e-05	0.0228996	chr2R	9611138	9683858	-	protein_coding	Mmp2
FBgn0000591	-1.23785	4.81528	27.8032	0.000129061	0.050116	chr3R	26040239	26041008	+	protein_coding	E(spl)m8-HLH
FBgn0037323	-1.24596	3.21112	6.71222	0.0224036	0.342626	chr3R	5400593	5404135	-	protein_coding	CG2663
FBgn0085479	-1.24745	-0.700338	6.68152	0.0219787	0.342287	chrX	9329015	9330487	-	protein_coding	CG34450
FBgn0004396	-1.25059	6.50828	7.01003	0.0232807	0.349091	chr3L	15535394	15553214	+	protein_coding	CrebA
FBgn0046875	-1.25127	2.37561	6.19908	0.0263805	0.364852	chr3R	6111670	6112302	-	protein_coding	Obp83g
FBgn0051777	-1.25848	3.70615	9.49295	0.00872179	0.247051	chr2L	3706550	3707063	-	protein_coding	CG31777
FBgn0263973	-1.26695	1.20875	4.75625	0.0472532	0.448712	chr3L	6563196	6589479	-	protein_coding	jv
FBgn0261509	-1.26911	5.12581	5.76342	0.0356779	0.406075	chr2L	1555128	1608404	+	protein_coding	haf
FBgn0001226	-1.2707	10.6434	44.9528	1.15e-05	0.012769	chr3L	9384062	9385694	+	protein_coding	Hsp27
FBgn0050438	-1.27818	1.49804	6.57618	0.0228616	0.346272	chr2R	5496673	5549543	+	protein_coding	CG30438
FBgn0032470	-1.28153	-0.820337	4.81535	0.046082	0.444296	chr2L	13106806	13109468	+	protein_coding	CG5142
FBgn0039223	-1.28917	3.98945	30.5597	8.22e-05	0.0424803	chr3R	24784551	24787421	-	protein_coding	CG5805
FBgn0001089	-1.29523	4.56802	14.7587	0.0020864	0.148923	chr2L	6003573	6006827	-	protein_coding	Gal
FBgn0261705	-1.30027	1.53294	4.7911	0.0465584	0.445667	chr2R	23011077	23042943	-	protein_coding	CG42741
FBgn0263851	-1.30028	-1.2879	4.6603	0.0492303	0.455925	chr4	65576	65645	-	snoRNA	snoRNA:CD-24
FBgn0038934	-1.30619	0.0292345	4.8365	0.0456713	0.442817	chr3R	22211823	22217415	+	protein_coding	Gld2
FBgn0264878	-1.31063	0.176774	9.58855	0.00810665	0.239629	chr2R	9610463	9615617	+	lincRNA	CR44069
FBgn0011758	-1.31082	4.09558	20.3445	0.000522857	0.101221	chrX	17397477	17403278	+	protein_coding	B-H1
FBgn0002592	-1.32271	4.98948	11.4196	0.00556699	0.212749	chr3R	26016513	26017470	-	protein_coding	E(spl)m2-BFM
FBgn0263380	-1.32885	4.35239	5.56922	0.0379288	0.415985	chr3L	14976625	14977631	-	lincRNA	CR43432
FBgn0265985	-1.33966	-0.394357	6.30976	0.0252858	0.359163	chr2R	22690494	22691895	+	lincRNA	CR44764
FBgn0010470	-1.34484	7.51343	28.2931	0.000124095	0.0495225	chr2R	21487166	21497929	-	protein_coding	Fkbp14
FBgn0033133	-1.35053	3.76593	11.0111	0.00554982	0.212749	chr2R	7042655	7044710	+	protein_coding	Tsp42Ek
FBgn0029924	-1.36374	4.85798	26.625	0.000158035	0.0533643	chrX	6969917	6972265	+	protein_coding	CG4586
FBgn0267465	-1.37085	-0.653462	5.66149	0.0325552	0.393418	chr3L	1648627	1649699	-	lincRNA	CR45815
FBgn0083977	-1.41875	0.281697	10.5955	0.00593679	0.216915	chr2R	9260277	9263971	-	protein_coding	CG34141
FBgn0030617	-1.41897	4.24043	7.01978	0.0222725	0.342287	chrX	15139936	15163225	-	protein_coding	CG9095
FBgn0036677	-1.41959	3.9936	23.9845	0.000254709	0.0698819	chr3L	16923913	16927434	-	protein_coding	CG13023
FBgn0266621	-1.4198	-0.933404	7.99677	0.0137192	0.28671	chr2R	6663394	6664195	-	lincRNA	CR45128
FBgn0262717	-1.43196	5.3291	9.15274	0.0115142	0.269561	chr3R	10686942	10696270	+	protein_coding	Skeletor
FBgn0038412	-1.43723	1.93399	10.4065	0.00628701	0.220787	chr3R	16305757	16308700	+	protein_coding	Zip89B
FBgn0033830	-1.44321	1.2728	13.5397	0.00258145	0.163947	chr2R	13375974	13377731	-	protein_coding	CG10814
FBgn0002735	-1.44599	5.28312	25.0674	0.000234719	0.0672871	chr3R	25999850	26000761	+	protein_coding	E(spl)mgamma-HLH
FBgn0031970	-1.44956	-0.340945	5.09403	0.041001	0.426861	chr2L	7994387	7998151	-	protein_coding	CG7227
FBgn0002732	-1.45032	5.69876	14.0333	0.00301974	0.170839	chr3R	26010892	26011568	+	protein_coding	E(spl)malpha-BFM
FBgn0002734	-1.45648	4.43187	19.9855	0.000615764	0.102341	chr3R	25997620	25998633	+	protein_coding	E(spl)mdelta-HLH
FBgn0266200	-1.45733	-0.604124	5.03079	0.0420935	0.430841	chrX	6744878	6746423	+	lincRNA	CR44895
FBgn0036806	-1.46703	1.93877	12.6897	0.00324791	0.17558	chr3L	18684258	18686319	-	protein_coding	Cyp12c1
FBgn0028938	-1.46889	0.257022	5.63643	0.0328822	0.393846	chr2L	13920706	13923553	-	protein_coding	CG16886
FBgn0003267	-1.47601	1.95393	9.90956	0.00732807	0.233425	chr3R	26876770	26881171	-	protein_coding	ro
FBgn0039129	-1.47904	0.766332	12.4666	0.00345445	0.17999	chr3R	23932728	23933530	-	protein_coding	RpS19b
FBgn0036620	-1.48229	0.618159	12.7792	0.00316909	0.173856	chr3L	16368388	16369518	+	protein_coding	CG4842
FBgn0001229	-1.48878	6.80084	20.2003	0.000742829	0.112247	chr3L	9371510	9372497	-	protein_coding	Hsp67Bc
FBgn0035574	-1.48889	4.67464	7.12153	0.0222461	0.342287	chr3L	4692782	4796253	+	protein_coding	RhoGEF64C
FBgn0000320	-1.49513	6.5215	17.9382	0.00124219	0.130171	chr2L	6527446	6546976	-	protein_coding	eya
FBgn0036605	-1.5036	2.01851	5.49275	0.0354768	0.405743	chr3L	16318953	16319526	-	protein_coding	CG13041
FBgn0261799	-1.50532	2.18039	6.01076	0.0289279	0.375978	chr3L	16422794	16451958	-	protein_coding	dsx-c73A
FBgn0039749	-1.50751	1.98081	6.61455	0.0225353	0.342626	chr3R	30153021	30160473	-	protein_coding	CG11498
FBgn0036382	-1.51146	0.749853	7.0438	0.0192319	0.323759	chr3L	13878993	13883056	+	protein_coding	CG13737
FBgn0264443	-1.52845	4.39592	22.5946	0.000355789	0.0832264	chr2L	19968683	20017282	-	protein_coding	CG43861
FBgn0032749	-1.52924	-0.37138	5.9901	0.0286022	0.374516	chr2L	19059128	19063132	+	protein_coding	Phlpp
FBgn0267666	-1.54835	1.63958	12.9148	0.0030539	0.17187	chr3L	10306677	10320600	+	lincRNA	CR46004
FBgn0039941	-1.55265	1.23154	8.26934	0.0124971	0.275803	chrX	23068300	23081144	+	protein_coding	CG17167
FBgn0052006	-1.55641	-0.877931	4.82726	0.0458502	0.443572	chr4	150763	153538	+	protein_coding	CG32006
FBgn0085282	-1.56697	1.62558	7.64504	0.0155072	0.29833	chr3L	18086673	18087320	-	protein_coding	CG34253
FBgn0030598	-1.56725	3.32017	7.62525	0.0170906	0.308739	chrX	14919251	14923493	-	protein_coding	CG9503
FBgn0039167	-1.57413	2.76723	6.98995	0.0207124	0.333048	chr3R	24214630	24218718	-	protein_coding	CG17786
FBgn0262624	-1.57436	4.11179	19.1409	0.000742335	0.112247	chr3L	1885656	1891462	+	protein_coding	Tmhs
FBgn0054057	-1.57545	1.12432	16.2342	0.00130908	0.132003	chr3L	897379	898772	+	protein_coding	CG34057
FBgn0030207	-1.57562	-1.28487	5.80675	0.0307337	0.38165	chrX	10477259	10478493	-	protein_coding	CG2887
FBgn0035638	-1.58053	-1.40783	6.6192	0.0224962	0.342626	chr3L	5794404	5796543	-	protein_coding	Tektin-C
FBgn0259233	-1.58687	0.0695484	7.05121	0.0191801	0.323759	chr3R	24772180	24784562	+	protein_coding	CG42331
FBgn0030816	-1.59675	4.91076	16.2604	0.00169871	0.136713	chrX	17091853	17098488	+	protein_coding	CG16700
FBgn0030947	-1.61103	-0.722929	4.92742	0.0439541	0.435814	chrX	18660471	18662153	-	protein_coding	CG6696
FBgn0003295	-1.63117	4.81703	15.9765	0.00183097	0.140674	chr3L	1370627	1387437	+	protein_coding	ru
FBgn0029835	-1.6358	2.79097	5.16396	0.0427571	0.432665	chrX	6050827	6065646	+	protein_coding	CG5921
FBgn0265819	-1.65187	-0.626107	6.26403	0.0257315	0.361843	chr2L	4228920	4229458	+	lincRNA	CR44608
FBgn0037975	-1.65457	3.12293	14.0561	0.00225733	0.15483	chr3R	11983097	11984541	-	protein_coding	CG3397
FBgn0037807	-1.65457	2.21367	15.1538	0.00170446	0.136713	chr3R	10307805	10311613	-	protein_coding	CG6293
FBgn0266737	-1.65597	0.730275	14.9738	0.00178292	0.139193	chr3L	19260039	19260895	+	lincRNA	CR45210
FBgn0040367	-1.66154	2.85488	17.4059	0.000994544	0.124737	chrX	1209969	1211853	+	protein_coding	CG11382
FBgn0029866	-1.66367	4.32338	7.32486	0.0208586	0.333713	chrX	6337761	6343731	+	protein_coding	CG3842
FBgn0039494	-1.6769	3.90238	12.6575	0.00386557	0.182692	chr3R	27157947	27159781	+	protein_coding	grass
FBgn0037615	-1.68083	-0.757035	5.16189	0.0398656	0.422972	chr3R	8719197	8721320	+	protein_coding	CG11760
FBgn0035257	-1.69191	-0.932759	5.07585	0.0413116	0.427734	chr3L	1694616	1696412	+	protein_coding	CG12011
FBgn0034094	-1.69691	3.52776	6.37176	0.0278915	0.372276	chr2R	16226500	16229869	+	protein_coding	Tsf3
FBgn0035484	-1.71737	3.07089	5.9028	0.0325488	0.393418	chr3L	4022699	4026011	-	protein_coding	CG11594
FBgn0035208	-1.71916	3.06931	9.8536	0.00808943	0.239629	chr3L	1321791	1322806	-	protein_coding	CG9184
FBgn0003292	-1.72339	4.41025	7.23509	0.0217372	0.341704	chr3L	11584121	11587770	-	protein_coding	rt
FBgn0003053	-1.72429	5.33351	14.5332	0.00279313	0.167144	chrX	4617563	4627206	+	protein_coding	peb
FBgn0033439	-1.72607	2.03406	7.57536	0.0161979	0.303177	chr2R	9706266	9707580	+	protein_coding	CG1773
FBgn0263049	-1.74742	0.5058	13.1003	0.00290397	0.169059	chr2L	18455716	18473132	+	lincRNA	let-7-C
FBgn0025456	-1.7604	5.36941	16.7561	0.00167318	0.136713	chr3R	17393271	17394640	-	protein_coding	CREG
FBgn0063127	-1.7808	8.80759	45.729	1.12e-05	0.012769	chr3R	6699559	6700164	-	lincRNA	pncr002:3R
FBgn0039704	-1.78553	5.99851	7.01501	0.0245403	0.357028	chr3R	29819130	29825800	+	protein_coding	neo
FBgn0037416	-1.80007	1.4015	4.86885	0.0464598	0.445299	chr3R	6260210	6262105	+	protein_coding	Osi9
FBgn0034030	-1.80463	0.638364	11.5484	0.00448051	0.196683	chr2R	15544315	15549984	-	protein_coding	CG8192
FBgn0015569	-1.81386	2.18375	19.888	0.000575479	0.102069	chr3R	7486582	7493845	-	protein_coding	alpha-Est10
FBgn0263079	-1.82543	0.860692	9.16662	0.00928033	0.253427	chr2L	18666891	18671246	-	protein_coding	CG43338
FBgn0263838	-1.82919	-1.91318	5.03925	0.0419454	0.430461	chr2L	19023670	19024440	-	lincRNA	CR43700
FBgn0036969	-1.83506	-0.31356	5.93283	0.0292488	0.376899	chr3L	20320951	20322358	+	protein_coding	Spn77Bb
FBgn0001225	-1.83981	7.74234	17.1846	0.00160576	0.136713	chr3L	9376417	9377427	-	protein_coding	Hsp26
FBgn0013755	-1.84359	-0.615495	6.67546	0.0220285	0.342287	chr3L	1647868	1648612	+	protein_coding	Bro
FBgn0250907	-1.84531	8.51719	11.4516	0.00648448	0.220882	chr2L	22999573	23025915	-	protein_coding	Cht3
FBgn0085411	-1.86323	1.36093	9.48856	0.00836844	0.242078	chr3L	9878984	9884493	+	protein_coding	CG34382
FBgn0053126	-1.86345	6.12614	12.7509	0.00479851	0.201463	chr2L	1359836	1361821	-	protein_coding	NLaz
FBgn0004618	-1.8764	5.54369	10.4716	0.0085693	0.244664	chr3R	18367926	18372738	-	protein_coding	gl
FBgn0033365	-1.8805	2.8832	8.21556	0.01414	0.287693	chr2R	9019031	9031045	-	protein_coding	CG8170
FBgn0001253	-1.88417	8.69808	13.8866	0.00348628	0.180577	chr3L	8372404	8391171	+	protein_coding	ImpE1
FBgn0004003	-1.8969	4.98302	6.57267	0.028135	0.372276	chr2R	19249394	19250917	+	protein_coding	wbl
FBgn0036168	-1.90634	0.0646358	5.19564	0.0393147	0.422972	chr3L	11513704	11518904	+	protein_coding	CG7512
FBgn0011653	-1.91512	5.5943	10.1651	0.00941369	0.254163	chr3L	4161665	4167464	-	protein_coding	mas
FBgn0020445	-1.91809	4.86605	15.9578	0.00202458	0.147961	chr2L	3334874	3354829	-	protein_coding	E23
FBgn0052447	-1.92006	5.84643	7.56635	0.0206396	0.332634	chr3L	21690611	21706365	-	protein_coding	CG32447
FBgn0037548	-1.94223	2.32643	12.4047	0.00352081	0.180766	chr3R	8094123	8105083	+	protein_coding	CG7900
FBgn0028939	-1.95174	4.55005	7.87917	0.0181355	0.317437	chr2L	13980125	13983269	+	protein_coding	NimC2
FBgn0031735	-1.97611	1.76849	20.9226	0.000463964	0.0988256	chr2L	5746156	5747961	+	protein_coding	CG11029
FBgn0039852	-1.97662	5.41245	5.47239	0.0421495	0.431044	chr3R	31543031	31566165	+	protein_coding	nyo
FBgn0052055	-1.98224	1.28244	20.446	0.000511914	0.100997	chr3L	10218503	10220164	-	protein_coding	CG32055
FBgn0038414	-1.98943	-1.62038	6.94701	0.0199245	0.327419	chr3R	16323414	16325128	+	protein_coding	CG6901
FBgn0264272	-1.99022	2.46321	13.478	0.00265168	0.163947	chr3L	1200785	1232700	+	protein_coding	mwh
FBgn0033708	-2.01015	-0.602988	6.33208	0.0250716	0.358713	chr2R	12298746	12302240	-	protein_coding	CG8850
FBgn0037448	-2.01537	2.09474	12.6876	0.00324982	0.17558	chr3R	6478310	6495025	+	protein_coding	CG15186
FBgn0030586	-2.02115	1.94434	9.51969	0.00855906	0.244664	chrX	14842616	14844757	-	protein_coding	CG12539
FBgn0053514	-2.02363	1.71003	5.38257	0.0386251	0.41995	chr3L	4365433	4366671	+	protein_coding	CG33514
FBgn0259164	-2.03072	-0.415642	5.87521	0.0299167	0.379557	chr3L	6066295	6071545	+	protein_coding	CG42269
FBgn0053218	-2.03137	-1.58469	6.98734	0.0196325	0.326091	chrX	2330158	2330826	+	lincRNA	CR33218
FBgn0250839	-2.03182	5.64689	8.66211	0.0147373	0.292275	chr3R	4956998	4961351	-	protein_coding	CG2016
FBgn0002576	-2.03475	4.13229	9.15649	0.0119459	0.272413	chrX	9284648	9303636	+	protein_coding	lz
FBgn0265977	-2.03975	-0.725901	9.1043	0.00946987	0.254253	chr2R	22318994	22320895	-	lincRNA	CR44756
FBgn0264747	-2.04847	-1.6747	7.24275	0.0178945	0.315011	chr3L	18070299	18072123	-	protein_coding	CG44005
FBgn0266002	-2.06753	-0.639007	6.50646	0.0234688	0.350117	chr2L	6551853	6552436	+	lincRNA	CR44776
FBgn0046253	-2.09788	2.19048	6.62122	0.0245165	0.357028	chr2R	23343404	23347641	-	protein_coding	CG3502
FBgn0259236	-2.10099	2.33284	14.9276	0.00180374	0.140141	chr3L	15613183	15647762	-	protein_coding	comm3
FBgn0033827	-2.10574	0.688053	6.08549	0.02811	0.372276	chr2R	13298994	13301547	+	protein_coding	CG17047
FBgn0052040	-2.11584	-1.32948	5.14369	0.0401665	0.424117	chr3L	9354032	9355457	+	protein_coding	CG32040
FBgn0043069	-2.11728	0.437169	8.59989	0.0111809	0.266747	chr3R	16988813	16990419	+	protein_coding	MESK4
FBgn0037721	-2.12	4.83929	9.93505	0.00999699	0.256575	chr3R	9625156	9626930	-	protein_coding	CG9427
FBgn0004865	-2.131	5.16975	33.0672	8.71e-05	0.0424803	chr3L	21226608	21266503	+	protein_coding	Eip78C
FBgn0086061	-2.15295	-1.17502	7.55609	0.0160014	0.302537	chr3R	29862625	29862717	+	snoRNA	snoRNA:Or-CD8
FBgn0034459	-2.15584	-1.22578	5.17134	0.0397104	0.422972	chr2R	19593789	19596866	+	protein_coding	CG16716
FBgn0085771	-2.15677	-0.802056	5.35965	0.036762	0.409843	chrX	23239717	23240975	+	pseudogene	28SrRNA-Psi:CR40741
FBgn0261526	-2.15845	3.27609	5.94311	0.0336529	0.398631	chr3L	4501651	4508433	-	protein_coding	NT1
FBgn0266963	-2.16011	-1.47152	5.6396	0.0328406	0.393846	chr3L	6936566	6937405	+	lincRNA	CR45414
FBgn0037409	-2.16039	2.44982	8.76785	0.0117539	0.270894	chr3R	6198810	6207678	+	protein_coding	Osi24
FBgn0085325	-2.1754	7.47036	6.58512	0.0288246	0.37519	chr3R	29722537	29723013	+	protein_coding	CG34296
FBgn0031451	-2.18332	-1.03747	8.32697	0.0122553	0.27404	chr2L	2743374	2744934	-	protein_coding	CG9961
FBgn0052282	-2.18702	-2.02225	4.63015	0.0498716	0.456707	chr3L	3315619	3315942	+	protein_coding	Drsl4
FBgn0264467	-2.18773	-1.04063	5.56006	0.0339025	0.399202	chr3L	20315133	20317283	-	lincRNA	CR43875
FBgn0033774	-2.20111	-1.61576	5.79788	0.0308414	0.382099	chr2R	12762112	12763825	+	protein_coding	CG12374
FBgn0051636	-2.20636	1.00739	6.79487	0.0217683	0.341888	chr2L	6656458	6658152	-	protein_coding	CG31636
FBgn0031432	-2.20681	1.95112	6.23862	0.0283014	0.373674	chr2L	2562482	2564830	-	protein_coding	Cyp309a1
FBgn0030594	-2.2078	2.40089	14.9267	0.00186081	0.141446	chrX	14906333	14909708	-	protein_coding	CG9509
FBgn0263493	-2.21316	1.06854	12.7948	0.00315558	0.173856	chr3L	9386111	9386463	+	pseudogene	CR43482
FBgn0037630	-2.21513	-1.09297	15.1522	0.00170512	0.136713	chr3R	8794683	8796966	+	protein_coding	Ir85a
FBgn0024366	-2.23472	2.42138	11.8285	0.00452522	0.19698	chrX	1329517	1341587	-	protein_coding	CG11409
FBgn0038398	-2.24182	-1.55953	5.88027	0.0298573	0.379352	chr3R	16083877	16087222	+	protein_coding	sxe2
FBgn0085222	-2.24457	1.09885	19.5038	0.000624533	0.102488	chr2R	17508994	17511394	+	protein_coding	CG34193
FBgn0035522	-2.24467	4.86956	8.87154	0.0137829	0.286919	chr3L	4263718	4277778	+	protein_coding	CG1273
FBgn0050380	-2.24549	0.130354	13.3456	0.00271854	0.16506	chr2R	7939200	7939659	-	protein_coding	CG30380
FBgn0052568	-2.26567	-1.51696	5.56513	0.0338336	0.399202	chrX	16740905	16742918	+	protein_coding	CG32568
FBgn0027570	-2.27957	6.07582	9.52115	0.0118455	0.271417	chr3R	4719457	4731878	-	protein_coding	Nep2
FBgn0010433	-2.28474	3.90356	35.4631	4.47e-05	0.0290872	chr3R	8278051	8279274	+	protein_coding	ato
FBgn0029863	-2.29393	4.33815	12.4981	0.00492451	0.203458	chrX	6303974	6306745	+	protein_coding	CG3823
FBgn0035943	-2.30115	2.63485	8.73183	0.0123638	0.275502	chr3L	8964911	8966374	-	protein_coding	CG5653
FBgn0265706	-2.31401	-2.20389	4.69744	0.0484535	0.452682	chr3L	609178	609620	-	lincRNA	CR44513
FBgn0034999	-2.31968	3.81147	13.0387	0.00401164	0.185301	chr2R	24294096	24298111	+	protein_coding	CG3394
FBgn0265987	-2.33695	-1.80975	6.26333	0.0257385	0.361843	chrX	10744507	10745250	+	lincRNA	CR44766
FBgn0035429	-2.33986	0.404782	7.07288	0.0192377	0.323759	chr3L	3280238	3290896	+	protein_coding	CG12017
FBgn0039480	-2.36813	2.68262	16.4258	0.00138211	0.132848	chr3R	27083129	27087778	-	protein_coding	Cpr97Ea
FBgn0034462	-2.38119	4.85605	9.71779	0.0108893	0.264664	chr2R	19646482	19647645	-	protein_coding	CG15905
FBgn0265266	-2.38863	1.06111	6.8987	0.021387	0.33771	chr3R	24859899	24860366	-	protein_coding	CG13639
FBgn0036075	-2.39736	-1.72544	5.18126	0.0395483	0.422972	chr3L	10215664	10216980	+	protein_coding	CG8065
FBgn0265578	-2.42819	-2.36216	5.72715	0.0317166	0.386744	chr2L	16340391	16342324	-	protein_coding	CG44405
FBgn0052793	-2.45309	0.530493	6.98685	0.0202445	0.329021	chrX	2929795	2932626	+	protein_coding	CG32793
FBgn0034326	-2.45707	-2.0937	4.95686	0.0434146	0.433381	chr2R	18299316	18300072	+	protein_coding	CG18540
FBgn0036617	-2.47371	0.11684	9.6173	0.00803313	0.239629	chr3L	16362602	16363750	+	protein_coding	Cpr72Ea
FBgn0267005	-2.47627	-1.47484	5.63432	0.0329099	0.393909	chr2L	3854287	3854994	-	lincRNA	CR45449
FBgn0267625	-2.4767	-1.75618	8.29568	0.0123859	0.275645	chr3L	22345382	22346236	+	lincRNA	CR45963
FBgn0031730	-2.51171	-1.03243	12.97	0.0030083	0.170839	chr2L	5706373	5713791	+	protein_coding	CG7236
FBgn0032520	-2.52554	0.415467	28.7683	0.000109818	0.0485602	chr2L	13396391	13398664	-	protein_coding	CG10859
FBgn0051506	-2.52634	-2.21954	4.75736	0.0472309	0.448712	chr3R	20604748	20604832	-	tRNA	tRNA:CR31506
FBgn0030398	-2.54194	1.83505	12.0513	0.0041866	0.188494	chrX	12553123	12554235	+	protein_coding	Cpr11B
FBgn0263343	-2.55263	-1.56896	4.70576	0.0482815	0.452029	chr3R	4984497	4986120	-	lincRNA	CR43424
FBgn0063083	-2.57701	-0.714015	5.58692	0.0336234	0.398631	chr3L	7406322	7406617	+	lincRNA	pncr015:3L
FBgn0040359	-2.57839	0.86175	7.63841	0.0163775	0.304563	chrX	1191307	1196660	+	protein_coding	CG11380
FBgn0038986	-2.59691	-1.01891	12.4701	0.00345114	0.17999	chr3R	22558341	22562572	-	protein_coding	CG5278
FBgn0033490	-2.60461	-1.4244	7.34652	0.01724	0.309211	chr2R	10137655	10139267	+	protein_coding	CG12917
FBgn0038258	-2.6269	-2.30104	6.47147	0.0237805	0.352372	chr3R	14751747	14754460	-	protein_coding	CG7362
FBgn0267109	-2.63206	-2.03717	7.35079	0.0172137	0.309211	chr3R	8233227	8233962	-	lincRNA	CR45549
FBgn0038694	-2.64362	-1.12852	8.84747	0.0102999	0.257263	chr3R	19247051	19248136	-	protein_coding	CG5217
FBgn0039053	-2.64535	-2.38829	5.24731	0.0384887	0.419505	chr3R	23099532	23100983	+	protein_coding	CG6738
FBgn0037665	-2.64603	4.83286	10.6828	0.00849353	0.244231	chr3R	9251842	9253514	+	protein_coding	St2
FBgn0262854	-2.64713	-1.23766	7.22183	0.0180299	0.315956	chr3L	21258019	21258758	+	protein_coding	CG43218
FBgn0038073	-2.64864	-0.0851916	12.9983	0.00298532	0.170839	chr3R	12662830	12673959	+	protein_coding	CG14395
FBgn0035056	-2.65275	3.79827	13.6955	0.0035836	0.18233	chr2R	24757377	24760466	+	protein_coding	spz6
FBgn0032519	-2.66598	1.38178	42.1361	1.62e-05	0.0142491	chr2L	13395359	13396184	-	protein_coding	CG16957
FBgn0265011	-2.66987	4.97353	8.75605	0.0147063	0.292275	chr2R	8992944	9006587	-	protein_coding	Np
FBgn0032025	-2.67183	3.32984	6.09809	0.0328209	0.393846	chr2L	8346619	8351112	+	protein_coding	CG7778
FBgn0266357	-2.67456	-2.59666	5.44559	0.0355024	0.405743	chr2L	1345500	1345840	-	lincRNA	CR45005
FBgn0024294	-2.68125	7.22236	28.472	0.000259816	0.0701862	chr2R	7147691	7149289	+	protein_coding	Spn43Aa
FBgn0039078	-2.68834	4.18152	8.02647	0.0179043	0.315011	chr3R	23408683	23472278	-	protein_coding	CG4374
FBgn0036678	-2.70967	5.27576	13.0635	0.00473176	0.201463	chr3L	16928380	16935536	-	protein_coding	CG11905
FBgn0263802	-2.71334	-0.877111	11.1506	0.0050316	0.205468	chr2R	10760777	10761668	+	lincRNA	CR43605
FBgn0267777	-2.73055	-2.2826	5.64165	0.0328138	0.393846	chr3R	29719712	29721191	+	lincRNA	CR46108
FBgn0004783	-2.73437	0.651974	19.6609	0.000603911	0.102341	chr3R	6704083	6704903	+	protein_coding	Ccp84Aa
FBgn0021738	-2.73657	-0.421208	9.42088	0.00855117	0.244664	chrX	3793222	3797339	+	protein_coding	Crg-1
FBgn0037291	-2.75808	-1.49157	6.12058	0.0271904	0.367825	chr3R	4981998	4984232	-	protein_coding	CG14662
FBgn0034454	-2.76306	-0.890667	4.8726	0.0451622	0.440287	chr2R	19497751	19500372	+	protein_coding	CG15120
FBgn0265667	-2.78434	-2.37764	4.80313	0.0463214	0.444944	chr2R	19604694	19605295	-	lincRNA	CR44474
FBgn0038700	-2.78441	-2.30995	5.06659	0.0414709	0.428345	chr3R	19387860	19389866	+	protein_coding	CG3734
FBgn0062517	-2.80339	-1.84757	11.6283	0.00437837	0.193165	chr3L	2595780	2596998	+	protein_coding	CG16984
FBgn0039804	-2.80481	4.75672	10.0786	0.0101249	0.256575	chr3R	30827818	30842034	+	protein_coding	CG15544
FBgn0037412	-2.81332	-0.159683	8.86969	0.0102249	0.256728	chr3R	6218317	6221781	-	protein_coding	Osi4
FBgn0262877	-2.81638	-2.81674	5.26085	0.0382756	0.417478	chr2L	6932120	6932954	+	protein_coding	CG43232
FBgn0267626	-2.82187	-2.09751	4.75053	0.0473683	0.448861	chr3L	22350700	22351500	+	lincRNA	CR45964
FBgn0037283	-2.82813	-2.45361	7.29894	0.0175366	0.312153	chr3R	4829910	4830513	-	protein_coding	CG14658
FBgn0263236	-2.82995	6.68112	44.2759	3.37e-05	0.0246212	chr3R	29244960	29250451	-	protein_coding	SP1029
FBgn0265300	-2.83146	-1.59019	7.5552	0.0160064	0.302537	chr2R	8941594	8942495	+	lincRNA	CR44273
FBgn0250833	-2.83309	-1.48652	5.1698	0.0397358	0.422972	chr3L	8325858	8328307	+	protein_coding	CG34461
FBgn0037589	-2.83776	-2.84339	5.28791	0.0441325	0.436456	chr3R	8419821	8420597	-	protein_coding	Obp85a
FBgn0039479	-2.84538	2.47474	22.0169	0.000413934	0.0920033	chr3R	27075869	27082818	+	protein_coding	CG14257
FBgn0036436	-2.85038	5.66011	18.4251	0.00155086	0.136713	chr3L	14674537	14678147	-	protein_coding	CG4914
FBgn0031775	-2.85093	2.46159	24.0498	0.000267524	0.0711735	chr2L	6067667	6068594	-	protein_coding	CG9150
FBgn0039028	-2.85325	-0.207743	5.09348	0.042869	0.433207	chr3R	22814482	22816178	-	protein_coding	CG13840
FBgn0034623	-2.86251	-1.76567	5.19082	0.0393928	0.422972	chr2R	21346874	21347883	-	protein_coding	CG9822
FBgn0031301	-2.87309	-2.71723	4.79727	0.0464366	0.445299	chr2L	1108539	1112694	+	protein_coding	CG14339
FBgn0031854	-2.87775	-2.49203	5.46319	0.0352507	0.404553	chr2L	6736363	6740188	-	protein_coding	TTLL3A
FBgn0030590	-2.89072	1.81178	13.5101	0.00292342	0.169414	chrX	14862988	14871181	-	protein_coding	CG9518
FBgn0265017	-2.89484	-0.339877	15.4364	0.00158911	0.136713	chr2L	2181961	2185495	+	lincRNA	CR43751
FBgn0264871	-2.9028	-2.7507	5.44579	0.0354996	0.405743	chr3R	22550031	22552687	-	lincRNA	CR44062
FBgn0267247	-2.90343	-2.51542	6.78081	0.0211828	0.336625	chr3L	1807545	1807855	+	lincRNA	CR45687
FBgn0032299	-2.93937	-1.12378	6.66282	0.0221325	0.342287	chr2L	10770867	10771370	+	protein_coding	CG17127
FBgn0266864	-2.95813	-2.65359	5.26063	0.038279	0.417478	chr2R	23720319	23721007	-	lincRNA	CR45325
FBgn0266280	-2.96384	-2.57419	4.63992	0.0496627	0.456585	chrX	761975	762500	+	lincRNA	CR44965
FBgn0266708	-2.96529	-1.79386	8.90891	0.0100939	0.256575	chr2R	15687387	15688985	-	protein_coding	Cep89
FBgn0267742	-3.00222	-2.30136	5.06941	0.0414223	0.428302	chr3R	26847808	26849236	+	lincRNA	CR46073
FBgn0028941	-3.02309	-2.51728	4.82916	0.0458134	0.443572	chr2L	13542267	13543633	+	protein_coding	CG16853
FBgn0267006	-3.03488	-1.47364	12.1639	0.00375938	0.18233	chr2L	3856477	3857172	-	lincRNA	CR45450
FBgn0082929	-3.0377	-2.1254	6.98317	0.0196624	0.326091	chr2R	14624006	14624091	+	snoRNA	snoRNA:Me28S-G2703c
FBgn0264945	-3.04419	-2.72763	4.67188	0.0489864	0.454823	chr2L	2226752	2227604	-	lincRNA	CR44114
FBgn0266211	-3.0507	1.51791	42.6882	1.52e-05	0.0140068	chr2L	19740838	19742506	-	pseudogene	CR44906
FBgn0267562	-3.05337	-2.12657	6.21566	0.026213	0.363879	chr3R	6834342	6834967	-	lincRNA	CR45902
FBgn0083012	-3.06719	-2.26625	10.1458	0.00681021	0.222411	chrX	17146611	17146759	-	snoRNA	snoRNA:Psi28S-1135a
FBgn0003382	-3.07182	-0.206451	16.132	0.00134156	0.132801	chr2R	11324313	11336463	+	protein_coding	sha
FBgn0265531	-3.09435	-2.31728	6.16592	0.0267191	0.36539	chrX	2065454	2066106	+	lincRNA	CR44381
FBgn0263109	-3.09829	4.93483	9.00575	0.0139209	0.286919	chr2R	5893894	5931363	+	protein_coding	CG43366
FBgn0037014	-3.14518	-1.38478	9.01886	0.00973711	0.256575	chr3L	20637198	20640910	+	protein_coding	CG13251
FBgn0050241	-3.15027	-1.81555	6.45521	0.023927	0.353351	chr2R	14984326	14984408	-	tRNA	tRNA:CR30241
FBgn0035124	-3.16797	-1.50954	6.45947	0.0238886	0.353212	chr3L	275154	276667	+	protein_coding	ttm2
FBgn0032803	-3.17611	4.88693	16.9083	0.00207951	0.148923	chr2L	19538424	19539740	+	protein_coding	CG13082
FBgn0004782	-3.17788	0.207782	24.4378	0.000234097	0.0672871	chr3R	6701967	6702877	-	protein_coding	Ccp84Ab
FBgn0037284	-3.19062	-2.92315	5.06379	0.0466798	0.445962	chr3R	4830848	4831297	-	protein_coding	CG14659
FBgn0029745	-3.20542	-2.12837	7.31736	0.0174211	0.310871	chrX	5131897	5132985	+	protein_coding	Rpn13R
FBgn0040074	-3.20972	-1.79603	8.38741	0.0120073	0.272752	chr3L	16331932	16332789	+	protein_coding	retinin
FBgn0011895	-3.22629	-3.13845	5.72974	0.0363701	0.407544	chr2R	6949132	6949205	-	tRNA	tRNA:K2:42Ed
FBgn0050083	-3.24788	-1.1215	9.68789	0.00785591	0.238654	chr2R	15711596	15712644	-	protein_coding	CG30083
FBgn0003996	-3.25205	3.46155	27.8786	0.000198341	0.060046	chrX	2790598	2796466	-	protein_coding	w
FBgn0031999	-3.28755	-1.65314	9.56345	0.00817145	0.239937	chr2L	8206170	8209637	+	protein_coding	CG8419
FBgn0265961	-3.30081	-0.979426	10.4142	0.00627234	0.220787	chr2R	21663159	21663925	+	lincRNA	CR44748
FBgn0265661	-3.30125	-2.37328	5.41077	0.0360066	0.406112	chr2R	18805594	18807195	+	lincRNA	CR44468
FBgn0030587	-3.34541	0.322072	28.4556	0.000115668	0.0488583	chrX	14846471	14848808	-	protein_coding	CG9522
FBgn0267783	-3.3729	-2.27231	9.49324	0.00835595	0.242078	chr3R	30357254	30358138	-	lincRNA	CR46114
FBgn0267400	-3.37638	-2.53263	4.79741	0.046434	0.445299	chr3R	5914315	5915335	+	lincRNA	CR45762
FBgn0264562	-3.38277	6.15096	24.4292	0.000588542	0.102319	chrX	1941939	2007956	+	protein_coding	Hr4
FBgn0001254	-3.38555	9.72924	16.1871	0.00254355	0.163947	chr3L	3510973	3512681	-	protein_coding	ImpE2
FBgn0264879	-3.39206	-0.797502	22.1814	0.000360226	0.0832264	chr2R	9636995	9637673	-	lincRNA	CR44070
FBgn0034860	-3.39765	5.30217	39.3237	6.52e-05	0.0381889	chr2R	23412319	23419684	-	protein_coding	CG9812
FBgn0031108	-3.40379	-2.63529	5.26191	0.0432784	0.433207	chrX	20412340	20413581	-	protein_coding	CG15459
FBgn0267470	-3.40437	0.313016	30.2104	8.69e-05	0.0424803	chr3L	3555630	3556299	-	lincRNA	CR45820
FBgn0266706	-3.40786	-2.21613	6.97241	0.01974	0.326197	chr3R	9228132	9230277	+	lincRNA	CR45196
FBgn0001255	-3.43165	5.93609	23.6259	0.000665197	0.106184	chr3R	8028452	8029546	-	protein_coding	ImpE3
FBgn0040967	-3.4654	-3.09274	5.3707	0.0415387	0.428762	chr2L	11034794	11035308	+	protein_coding	CG18666
FBgn0044811	-3.46724	-2.53619	5.07647	0.0464527	0.445299	chr2L	19911814	19912377	-	protein_coding	TotF
FBgn0267130	-3.4674	-1.68226	10.7912	0.00559769	0.212749	chr3R	30404428	30404989	+	lincRNA	CR45570
FBgn0037402	-3.48079	-2.65603	5.3938	0.0411804	0.427734	chr3R	6122591	6124405	+	protein_coding	Vha14-2
FBgn0033238	-3.48391	-2.95906	4.89872	0.0497655	0.456585	chr2R	7949838	7950465	+	protein_coding	CG11165
FBgn0011894	-3.49789	-3.09348	5.38557	0.0413076	0.427734	chr2R	6948283	6948356	-	tRNA	tRNA:K2:42Ec
FBgn0039161	-3.5004	2.07032	9.65711	0.00989953	0.256575	chr3R	24172627	24184144	+	protein_coding	CG13606
FBgn0054052	-3.50072	-2.37358	5.12938	0.0404049	0.424578	chrX	2321757	2322264	-	lincRNA	CR34052
FBgn0083984	-3.5027	-3.09051	5.43081	0.0406141	0.424887	chr3R	21877869	21878686	-	protein_coding	CG34148
FBgn0033203	-3.51099	0.0576527	5.73775	0.0344174	0.401017	chr2R	7661854	7663408	+	protein_coding	CG2070
FBgn0038511	-3.51677	3.99333	14.4226	0.00342401	0.17999	chr3R	17425767	17446499	+	protein_coding	CG5873
FBgn0262316	-3.5169	-3.13702	6.71255	0.0333881	0.398005	chr2R	8444981	8445081	+	pre_miRNA	mir-986
FBgn0027527	-3.52558	1.88522	10.2647	0.0081473	0.239629	chr3R	6234707	6237181	+	protein_coding	Osi6
FBgn0038676	-3.53688	2.78595	11.6182	0.00604815	0.218069	chr3R	19033537	19044693	+	protein_coding	CG6026
FBgn0034477	-3.54888	-2.82815	5.29639	0.0427175	0.43257	chr2R	19878835	19880920	-	protein_coding	CG13872
FBgn0021742	-3.56714	1.14416	6.52883	0.0266634	0.36539	chrX	10964031	10967134	-	protein_coding	C901
FBgn0051559	-3.56888	1.8567	17.5511	0.00117855	0.128004	chr3R	6150115	6157235	-	protein_coding	CG31559
FBgn0266072	-3.5704	0.647668	27.5879	0.000133867	0.050116	chr2L	7795848	7796260	+	lincRNA	CR44825
FBgn0040682	-3.57154	-0.793974	6.86224	0.0213534	0.337483	chr3R	5224138	5225542	+	protein_coding	CG14664
FBgn0035620	-3.58218	-2.52415	6.80661	0.0249343	0.358575	chr3L	5595541	5597422	+	protein_coding	CG5150
FBgn0052382	-3.58511	-2.9938	5.16866	0.0448404	0.438881	chr3L	7439553	7440733	-	protein_coding	sphinx2
FBgn0002577	-3.60066	3.38449	11.7888	0.00616387	0.218649	chrX	11754272	11769508	+	protein_coding	m
FBgn0035430	-3.61027	4.48266	10.8511	0.00849403	0.244231	chr3L	3291458	3299000	+	protein_coding	CG12009
FBgn0261686	-3.63725	-3.05712	4.9475	0.0488285	0.454738	chr2R	10356170	10356800	-	protein_coding	CG42733
FBgn0052255	-3.64888	-1.9314	10.4746	0.00615828	0.218649	chr3L	4035798	4037575	+	protein_coding	Gr64f
FBgn0259194	-3.65397	-3.05172	5.62317	0.0378184	0.415755	chr3R	23405508	23407402	+	protein_coding	Ir94e
FBgn0265952	-3.65429	-3.00914	5.84077	0.0349321	0.402373	chr2L	18899563	18900494	-	lincRNA	CR44739
FBgn0036427	-3.6572	-2.47658	6.71583	0.0216998	0.341422	chr3L	14519759	14521690	-	protein_coding	CG4613
FBgn0267526	-3.66784	-2.88309	5.03486	0.0472034	0.448712	chr3L	7629990	7630508	-	lincRNA	CR45866
FBgn0036704	-3.66995	-2.52838	6.34428	0.0292146	0.376899	chr3L	17252376	17253937	-	protein_coding	CG6497
FBgn0267674	-3.68576	-2.53492	4.92332	0.0492903	0.456138	chr3R	11356105	11356601	-	lincRNA	CR46010
FBgn0003319	-3.69213	4.43162	9.74472	0.0114228	0.269561	chr3R	16116160	16145284	+	protein_coding	Sb
FBgn0010549	-3.7062	1.22646	43.652	1.35e-05	0.013777	chr2R	9390164	9395281	+	protein_coding	l(2)03659
FBgn0030815	-3.72317	-1.41629	8.73124	0.0107031	0.262301	chrX	17080422	17087675	-	protein_coding	CG8945
FBgn0039224	-3.73051	-2.91092	5.28003	0.0429825	0.433207	chr3R	24788247	24790136	-	protein_coding	CG13634
FBgn0086068	-3.74212	-2.99858	5.80317	0.0354112	0.405601	chr3L	3221349	3221427	-	snoRNA	snoRNA:Or-CD12
FBgn0039217	-3.74329	0.378853	12.3097	0.00391873	0.183282	chr3R	24712779	24717430	+	protein_coding	CG13627
FBgn0000451	-3.74416	4.45143	8.31926	0.0171604	0.309211	chr3L	10190275	10201837	-	protein_coding	ect
FBgn0263842	-3.74531	-3.08917	5.58471	0.0472413	0.448712	chr2L	3765493	3765863	+	protein_coding	CG43703
FBgn0051207	-3.74849	-1.42337	10.5124	0.00608803	0.218162	chr3R	21046031	21047027	-	protein_coding	CG31207
FBgn0267527	-3.75011	-2.31381	7.83204	0.0145249	0.289822	chr3L	8055800	8056208	+	lincRNA	CR45867
FBgn0033818	-3.78714	-2.30995	7.3198	0.0174058	0.310871	chr2R	13248893	13251724	-	protein_coding	CG4712
FBgn0051380	-3.80199	-3.01806	5.01633	0.0475426	0.4493	chr3R	25787996	25789455	-	protein_coding	CG31380
FBgn0265339	-3.802	-3.01738	4.991	0.0480108	0.451196	chr2R	9861144	9861545	+	lincRNA	CR44293
FBgn0003065	-3.80281	1.30498	5.41863	0.0411026	0.427555	chr3R	31763303	31764772	-	protein_coding	CG2150
FBgn0030823	-3.81867	-2.88714	5.1703	0.0448123	0.438881	chrX	17200725	17202598	-	protein_coding	CG8918
FBgn0037664	-3.83079	4.76667	12.9472	0.00516792	0.206813	chr3R	9246648	9251431	+	protein_coding	CG8420
FBgn0035625	-3.83554	5.35863	16.1338	0.00262914	0.163947	chr3L	5630982	5652094	+	protein_coding	Blimp-1
FBgn0050430	-3.83571	-2.98503	5.94308	0.0336676	0.398631	chr2R	25129431	25129985	+	protein_coding	CG30430
FBgn0036106	-3.83732	1.08241	13.0296	0.00350052	0.180766	chr3L	10880698	10882386	-	protein_coding	CG6409
FBgn0263648	-3.84428	-3.01007	6.0616	0.0322715	0.391336	chr2L	14291200	14291817	+	lincRNA	CR43639
FBgn0266751	-3.85447	-2.03122	8.46007	0.011717	0.270894	chr3R	22194978	22209477	-	lincRNA	CR45224
FBgn0262880	-3.87844	0.387006	9.81873	0.00851628	0.244342	chr2L	7693029	7693821	+	protein_coding	CG43235
FBgn0036956	-3.93414	1.60783	7.62054	0.0189648	0.32209	chr3L	20231668	20233255	+	protein_coding	CG13813
FBgn0036618	-3.9651	-1.18404	21.1403	0.000443788	0.0962034	chr3L	16364898	16365707	+	protein_coding	Cpr72Eb
FBgn0266742	-3.97922	-2.53119	6.25747	0.0301146	0.380235	chr3R	8316983	8318006	+	lincRNA	CR45215
FBgn0266906	-3.99151	-2.9891	5.14864	0.0451846	0.440287	chr2L	357328	358174	+	lincRNA	CR45366
FBgn0004511	-4.00165	2.97688	10.6733	0.00822981	0.240492	chrX	11769768	11778784	-	protein_coding	dy
FBgn0260428	-4.00417	-2.7536	5.48616	0.0397846	0.422972	chr2L	4762894	4763951	+	protein_coding	CG42523
FBgn0040747	-4.02486	-2.90126	7.15458	0.0222055	0.342287	chr2R	14933514	14933913	+	protein_coding	CG12853
FBgn0086059	-4.03471	-2.73731	5.25047	0.0434663	0.433404	chr3R	24723825	24723920	+	snoRNA	snoRNA:Me18S-C1280
FBgn0263481	-4.03632	-2.88666	5.48063	0.0398666	0.422972	chr2R	10536744	10536905	-	snoRNA	snoRNA:lola-b
FBgn0259193	-4.0461	-2.96579	5.79169	0.0355591	0.405764	chr3R	23402807	23405139	+	protein_coding	Ir94d
FBgn0011859	-4.0494	-2.90534	5.23697	0.0436894	0.434591	chr2L	1938088	1938159	-	tRNA	tRNA:G3:22BCa
FBgn0030589	-4.06149	-2.03349	10.4927	0.00612453	0.218162	chrX	14854327	14856361	-	protein_coding	CG9519
FBgn0036679	-4.06574	-2.92301	5.8566	0.0347328	0.402373	chr3L	16938329	16938952	-	protein_coding	CG13022
FBgn0038492	-4.0828	4.60673	5.32105	0.0456541	0.442817	chr3R	17152994	17202130	-	protein_coding	Mur89F
FBgn0267202	-4.08996	-2.83185	5.94603	0.033632	0.398631	chr3R	16213487	16213787	+	lincRNA	CR45642
FBgn0262302	-4.09922	-2.91609	7.55785	0.0194799	0.32514	chr4	626125	626212	+	pre_miRNA	mir-954
FBgn0038339	-4.10945	3.23325	8.8105	0.0142576	0.287703	chr3R	15421107	15434738	-	protein_coding	CG6118
FBgn0051407	-4.12778	-2.95068	6.79551	0.0250277	0.358576	chr3R	10022844	10025150	-	protein_coding	CG31407
FBgn0038942	-4.13817	-2.93361	5.49857	0.0396015	0.422972	chr3R	22331990	22332559	+	protein_coding	CG13862
FBgn0266704	-4.14895	-2.9517	7.30535	0.0211358	0.336542	chr3R	6175735	6182078	+	lincRNA	CR45194
FBgn0259846	-4.15511	-2.90712	5.3156	0.0424089	0.43234	chrY	1032219	1032946	-	lincRNA	Su(Ste):CR42415
FBgn0051952	-4.16014	-2.61161	6.22594	0.0304498	0.380525	chr2L	3416692	3418068	+	protein_coding	CG31952
FBgn0000140	-4.16976	6.28295	91.8363	9.31e-07	0.00233478	chr3R	24753848	24760513	+	protein_coding	asp
FBgn0039582	-4.17601	-2.94544	5.48644	0.0397804	0.422972	chr3R	28352241	28353502	+	protein_coding	Or98b
FBgn0266651	-4.18624	-2.90184	8.70102	0.0136816	0.28671	chr3L	11632704	11633303	-	lincRNA	CR45158
FBgn0259794	-4.23529	-2.62652	5.16169	0.0449599	0.439262	chr3L	16859079	16860529	+	protein_coding	sinah
FBgn0034151	-4.23921	-2.89656	5.34534	0.0419365	0.430461	chr2R	16745222	16746579	-	protein_coding	CG15617
FBgn0266142	-4.2408	-2.80284	5.76	0.0359712	0.406112	chr2L	13865991	13866690	-	lincRNA	CR44848
FBgn0051954	-4.24486	-2.17577	5.10162	0.0408722	0.426172	chr2L	3509057	3510102	-	protein_coding	CG31954
FBgn0267618	-4.24655	-2.79241	5.25918	0.0433231	0.433207	chr3L	21642653	21644202	-	lincRNA	CR45956
FBgn0003270	-4.25916	-1.71473	5.06012	0.042502	0.43234	chr2L	18596135	18596921	-	protein_coding	amos
FBgn0265041	-4.26379	-2.47775	9.83774	0.00985457	0.256575	chr3R	18208778	18209282	+	protein_coding	CG44158
FBgn0265163	-4.27162	-2.86647	6.01522	0.0328094	0.393846	chr3R	12767626	12768357	+	lincRNA	CR44232
FBgn0039761	-4.28778	-2.78676	6.58232	0.0269087	0.366322	chr3R	30253181	30254097	+	protein_coding	CG18404
FBgn0039527	-4.29652	4.20987	19.22	0.00137261	0.132848	chr3R	27586473	27596130	-	protein_coding	CG5639
FBgn0266884	-4.30367	-2.88925	6.2547	0.0301439	0.380241	chr2L	857402	857795	+	lincRNA	CR45345
FBgn0039686	-4.31075	2.28122	25.3216	0.000286616	0.0714807	chr3R	29718662	29722388	+	protein_coding	CG15506
FBgn0266798	-4.32433	-2.92468	5.46557	0.0491075	0.455268	chr2L	8862609	8867511	-	lincRNA	CR45260
FBgn0265084	-4.33395	-2.74258	5.77	0.0358405	0.406075	chr3L	7658408	7695654	-	protein_coding	CG44195
FBgn0267024	-4.34176	-2.88376	6.24558	0.0302405	0.380481	chr2R	12848138	12849295	+	lincRNA	CR45468
FBgn0261856	-4.34189	-2.36067	5.16278	0.0449411	0.439262	chr2R	7000153	7001696	+	pseudogene	CR42785
FBgn0265443	-4.34537	-2.88253	6.39009	0.0287528	0.374906	chr2R	13254494	13255496	-	lincRNA	CR44343
FBgn0034506	-4.34601	-2.47528	7.41403	0.0204031	0.330802	chr2R	20343844	20346018	+	protein_coding	CG13870
FBgn0030429	-4.36333	-2.60283	5.88831	0.0343375	0.400353	chrX	12855687	12857722	-	protein_coding	CG4661
FBgn0267643	-4.36425	-2.71655	6.01549	0.0328062	0.393846	chr3L	2621720	2622629	-	lincRNA	CR45981
FBgn0030331	-4.37447	-2.36095	6.51034	0.027582	0.370269	chrX	11724245	11736617	+	protein_coding	CG15221
FBgn0034740	-4.40673	-2.49671	7.87152	0.0176351	0.312153	chr2R	22650555	22653595	+	protein_coding	nsr
FBgn0037428	-4.41311	-0.720861	5.77368	0.0338615	0.399202	chr3R	6330247	6331809	+	protein_coding	Osi18
FBgn0265065	-4.42212	-2.67589	8.07866	0.0165316	0.306201	chr3R	14421750	14422549	-	lincRNA	CR44176
FBgn0061196	-4.466	-2.67382	11.0671	0.00706797	0.227613	chrX	4959928	4961128	-	protein_coding	SIP3
FBgn0035434	-4.47263	3.23955	16.3954	0.0021745	0.151983	chr3L	3316780	3317144	+	protein_coding	Drsl5
FBgn0036351	-4.47456	1.69628	17.6264	0.0012917	0.131867	chr3L	13380358	13381346	-	protein_coding	CG14107
FBgn0259185	-4.48281	-2.71418	5.44001	0.0404747	0.424853	chr2R	24515684	24517458	+	protein_coding	Ir60b
FBgn0262680	-4.48575	-2.5377	9.78073	0.0100131	0.256575	chr3L	70850	71396	+	lincRNA	CR43150
FBgn0267294	-4.49444	-2.60569	7.4862	0.0199334	0.327419	chr2L	5297485	5297928	-	lincRNA	CR45730
FBgn0063373	-4.49579	-2.69276	8.51166	0.0144814	0.289822	chr2R	17702872	17702949	+	snoRNA	snoRNA:snR38:54Ec
FBgn0032494	-4.50677	-2.78286	5.36101	0.0416901	0.429311	chr2L	13239988	13241773	+	protein_coding	CG5945
FBgn0034563	-4.52197	-2.87187	5.48176	0.0488484	0.454738	chr2R	20972915	20974017	-	protein_coding	CG15649
FBgn0039331	-4.52955	-2.81099	8.0597	0.0166291	0.306712	chr3R	25358284	25360034	+	protein_coding	CG11913
FBgn0264568	-4.53998	-2.65115	8.11355	0.016354	0.304517	chr3L	21594596	21595460	+	lincRNA	CR43940
FBgn0033359	-4.54192	2.65613	10.4152	0.00884974	0.249172	chr2R	8969345	8985900	-	protein_coding	CG8213
FBgn0266816	-4.56617	-2.79099	7.73749	0.0183965	0.319172	chr2R	13243995	13245045	-	lincRNA	CR45278
FBgn0263650	-4.5743	-2.7527	9.96136	0.00952111	0.254461	chr3R	13815278	13815778	+	lincRNA	CR43641
FBgn0261813	-4.57527	-2.36046	8.5058	0.014507	0.289822	chr3L	11382807	11384258	-	lincRNA	CR42755
FBgn0031531	-4.60056	-2.56492	5.83946	0.0349487	0.402373	chr2L	3410559	3411199	+	protein_coding	CG8840
FBgn0263572	-4.69132	-2.66584	7.48856	0.0199183	0.327419	chr2R	8015248	8015343	+	pre_miRNA	mir-4981
FBgn0051815	-4.72172	-2.53054	7.58411	0.0193168	0.32415	chr2L	16605821	16607321	+	protein_coding	CG31815
FBgn0038602	-4.72499	-2.70333	6.86875	0.0244185	0.357006	chr3R	18302169	18302849	-	protein_coding	CG7126
FBgn0267217	-4.7423	-2.73952	6.60954	0.0266592	0.36539	chr3R	25848097	25848454	+	lincRNA	CR45657
FBgn0265347	-4.75412	-2.79171	7.51393	0.0265928	0.36539	chr2R	10786194	10786493	-	lincRNA	CR44301
FBgn0085309	-4.76396	0.394495	11.2033	0.00595962	0.216915	chr3R	17403271	17403718	-	protein_coding	CG34280
FBgn0266026	-4.76812	-2.77175	7.13884	0.0295286	0.37791	chr2L	3389347	3389753	+	lincRNA	CR44791
FBgn0029552	-4.76997	-2.8081	7.86697	0.0241619	0.354852	chrX	1012034	1012624	+	protein_coding	CG14631
FBgn0259966	-4.80312	-2.5663	6.16129	0.0311512	0.384388	chr2R	15192627	15193228	-	protein_coding	Sfp51E
FBgn0039795	-4.8115	6.03028	18.7684	0.00169758	0.136713	chr3R	30690641	30692768	+	protein_coding	Spn100A
FBgn0086907	-4.8289	-1.95156	14.4485	0.00312478	0.173856	chr2L	16715890	16719635	+	protein_coding	Cyt-c-d
FBgn0267128	-4.84806	-2.73535	10.9537	0.00728147	0.232464	chr3R	29276375	29277108	-	lincRNA	CR45568
FBgn0050286	-4.86202	-1.5131	22.9032	0.00031288	0.0748996	chr2R	21535715	21536795	-	protein_coding	CG30286
FBgn0034552	-4.86203	-2.28604	15.8406	0.00231074	0.157731	chr2R	20847979	20849939	-	protein_coding	CG17999
FBgn0264720	-4.86381	-2.57714	12.0146	0.00554821	0.212749	chr3L	72195	73101	-	lincRNA	CR43988
FBgn0038642	-4.879	-1.08701	15.9339	0.00140724	0.132848	chr3R	18687555	18692719	-	protein_coding	Muc91C
FBgn0038873	-4.92156	-2.46093	8.618	0.0140255	0.287282	chr3R	21242617	21245418	+	protein_coding	CG5892
FBgn0038133	-4.92697	-2.68886	6.35507	0.029105	0.376899	chr3R	13290628	13291846	+	protein_coding	Osi22
FBgn0265530	-4.92855	-2.34093	7.35129	0.0208222	0.333593	chr2R	16814394	16815495	-	lincRNA	CR44380
FBgn0266803	-4.94323	-2.70106	6.3648	0.0370264	0.410965	chr2R	10237743	10238145	-	lincRNA	CR45265
FBgn0036459	-4.95141	-2.0899	15.3528	0.00256337	0.163947	chr3L	14979619	14982432	+	protein_coding	CG3349
FBgn0050043	-4.98905	-2.26756	7.51473	0.0197513	0.326197	chr2R	12359435	12363165	+	protein_coding	CG30043
FBgn0000448	-5.14681	4.20416	21.1231	0.00103092	0.125894	chr2R	10203994	10237348	-	protein_coding	Hr46
FBgn0037429	-5.23501	0.190942	7.60686	0.0185778	0.319812	chr3R	6335361	6337196	+	protein_coding	Osi19
FBgn0261633	-5.29605	-0.182382	6.70573	0.0250364	0.358576	chr3L	16033777	16034170	+	protein_coding	CG42716
FBgn0030493	-5.29626	5.49207	8.86373	0.0150511	0.294203	chrX	13534399	13536202	+	protein_coding	CG15756
FBgn0035011	-5.30455	-2.50236	6.69543	0.0258902	0.362689	chr2R	24492213	24492855	-	protein_coding	CG13589
FBgn0267150	-5.31766	-2.35639	11.4386	0.00641913	0.220882	chr3R	13785805	13786583	-	lincRNA	CR45590
FBgn0031619	-5.33688	3.30567	10.7248	0.00871396	0.247051	chr2L	4651402	4652892	+	protein_coding	CG3355
FBgn0037645	-5.34386	3.69141	10.028	0.0106741	0.262301	chr3R	8950245	8963037	-	protein_coding	CG11966
FBgn0034898	-5.36075	-2.42849	10.7881	0.0076074	0.235588	chr2R	23718797	23719936	-	protein_coding	CG18128
FBgn0052570	-5.378	-2.31021	13.5186	0.00386207	0.182692	chrX	16734946	16735980	+	protein_coding	TwdlY
FBgn0267633	-5.46415	-2.19666	13.7461	0.00366409	0.18233	chr3L	22176422	22177599	-	lincRNA	CR45971
FBgn0266650	-5.52048	-2.08792	12.6331	0.00476549	0.201463	chr3L	13032395	13033070	-	lincRNA	CR45157
FBgn0037992	-5.52679	3.3164	9.94389	0.0107727	0.263134	chr3R	12121582	12128201	-	protein_coding	CG4702
FBgn0267469	-5.60863	-2.22079	9.8859	0.00972302	0.256575	chr3L	3137598	3138012	+	lincRNA	CR45819
FBgn0051913	-5.64801	-1.96939	23.8846	0.000532885	0.101221	chr2L	5784030	5784893	+	protein_coding	CG31913
FBgn0265588	-5.72723	-2.3404	6.41737	0.0285362	0.374516	chr2L	8886133	8888028	-	lincRNA	CR44415
FBgn0037414	-5.8157	4.06534	10.3975	0.00987132	0.256575	chr3R	6248993	6251683	+	protein_coding	Osi7
FBgn0036528	-5.83804	-2.31002	7.69493	0.0256321	0.360925	chr3L	15681632	15683445	-	protein_coding	CG7579
FBgn0037427	-5.88786	0.895296	12.7416	0.00430289	0.19124	chr3R	6311771	6327308	+	protein_coding	Osi17
FBgn0001256	-5.9163	5.03271	11.3746	0.00784617	0.238654	chr3L	13382764	13383999	+	protein_coding	ImpL1
FBgn0031942	-5.92677	-0.403001	8.16966	0.0150796	0.294203	chr2L	7752169	7753186	-	protein_coding	CG7203
FBgn0036416	-5.94468	4.2131	11.9724	0.00671925	0.222071	chr3L	14233468	14234609	+	protein_coding	CG7924
FBgn0085235	-6.00898	2.11414	46.6143	1.41e-05	0.013777	chr2R	22163737	22164594	-	protein_coding	CG34206
FBgn0085273	-6.02211	2.98084	16.1057	0.00243889	0.15932	chr3L	14235052	14235941	-	protein_coding	CG34244
FBgn0262874	-6.02743	1.72148	6.90525	0.0254849	0.360051	chrX	18138541	18139000	+	protein_coding	CG43229
FBgn0039592	-6.04882	3.47449	10.9172	0.00848003	0.244231	chr3R	28641584	28642891	-	protein_coding	CG14062
FBgn0262005	-6.07578	1.35201	9.41219	0.0114682	0.269561	chr3R	17404486	17405109	-	protein_coding	CG42823
FBgn0053117	-6.07924	-2.03038	9.10479	0.0121463	0.27362	chr2L	19912937	19913516	-	protein_coding	Victoria
FBgn0267695	-6.11562	0.517363	13.7968	0.00316939	0.173856	chr3L	14424500	14425926	+	lincRNA	CR46031
FBgn0036022	-6.17095	1.99144	7.67858	0.0200196	0.327914	chr3L	9638111	9639021	+	protein_coding	CG8329
FBgn0033602	-6.18506	-0.143781	14.6116	0.0023408	0.158036	chr2R	11265125	11266856	+	protein_coding	Cpr47Ee
FBgn0266403	-6.30819	0.328542	15.8281	0.00187635	0.142012	chr3L	3522849	3523620	-	lincRNA	CR45043
FBgn0267712	-6.31824	-2.0017	13.0817	0.00739388	0.233917	chr3R	21102007	21102889	-	lincRNA	CR46045
FBgn0036417	-6.3323	3.74136	12.452	0.00591666	0.216915	chr3L	14236634	14238272	+	protein_coding	CG7906
FBgn0034483	-6.34252	-1.47687	8.30345	0.01661	0.306682	chr2R	20211584	20212619	-	protein_coding	CG16894
FBgn0033819	-6.37118	-1.99897	26.9637	0.000967288	0.123738	chr2R	13251851	13254337	-	protein_coding	CG4714
FBgn0034990	-6.4547	3.25212	9.15849	0.0135315	0.28661	chr2R	24202090	24208203	-	protein_coding	CG11406
FBgn0033355	-6.63378	2.31508	11.1817	0.00747695	0.233917	chr2R	8940414	8941136	+	protein_coding	CG13748
FBgn0014850	-6.74999	-1.73533	6.30638	0.0472137	0.448712	chr3L	15660548	15661015	-	protein_coding	Eig71Ej
FBgn0264271	-7.13493	-1.41822	11.7776	0.00641367	0.220882	chr2R	11432649	11433298	-	lincRNA	CR43771
FBgn0267685	-7.18028	-1.40224	11.4216	0.0132937	0.284212	chr3R	14527184	14527980	+	lincRNA	CR46021
FBgn0265587	-7.18476	0.687769	14.9673	0.00460188	0.197566	chr2L	8867874	8868747	+	lincRNA	CR44414
FBgn0260646	-7.23318	-1.36859	13.5817	0.00405431	0.18539	chr3L	16034523	16034853	+	protein_coding	CG42538
FBgn0037430	-7.32157	1.2782	9.94501	0.010003	0.256575	chr3R	6340094	6341424	+	protein_coding	Osi20
FBgn0051437	-7.48027	-1.12912	12.7468	0.00537517	0.210206	chr3R	25383699	25384623	+	protein_coding	CG31437
FBgn0037424	-7.5356	2.56957	15.6005	0.00272609	0.16506	chr3R	6301803	6303653	+	protein_coding	Osi15
FBgn0032804	-7.5709	-0.811882	21.1582	0.000852074	0.117808	chr2L	19540606	19541540	+	protein_coding	CG13081
FBgn0038846	-7.70373	1.66988	23.1139	0.000536108	0.101221	chr3R	21015948	21017120	+	protein_coding	CG5697
FBgn0030495	-7.76404	2.08643	8.41663	0.0163051	0.304238	chrX	13552558	13555800	-	protein_coding	CG11816
FBgn0052631	-7.80101	-0.90846	9.52614	0.0136367	0.28671	chrX	13556471	13557866	+	protein_coding	CG32631
FBgn0035478	-8.37166	-0.42366	7.2635	0.0283038	0.373674	chr3L	3947890	3948687	+	protein_coding	CG10853
FBgn0266456	-8.37816	6.70454	22.0267	0.00104066	0.125894	chr3L	19266060	19266838	+	protein_coding	CG45081
FBgn0004588	-8.92892	6.92223	14.631	0.00387046	0.182692	chr3L	15649125	15649661	-	protein_coding	Eig71Ea
FBgn0045479	-9.46145	0.563432	71.1595	4.97e-06	0.008719	chr3L	4026768	4028600	+	protein_coding	Gr64a
FBgn0262528	-9.95914	1.0263	11.7362	0.0246167	0.357193	chr3L	15661866	15662279	+	protein_coding	CG43082
FBgn0261634	-10.6913	5.49077	13.6344	0.00476314	0.201463	chr3L	16032761	16033190	-	protein_coding	CG42717
FBgn0004589	-12.1367	6.92509	20.9592	0.00124306	0.130171	chr3L	15649935	15650541	+	protein_coding	Eig71Eb
FBgn0052475	-12.1546	3.16951	505.926	3.03e-08	0.000161269	chr3L	22427	26308	+	protein_coding	mthl8
FBgn0036656	-12.341	3.35694	10.7889	0.0154154	0.298304	chr3L	16724677	16726169	-	protein_coding	CG13026
FBgn0263376	-12.6019	5.26192	9.8832	0.0115097	0.269561	chr2R	14737577	14739242	-	lincRNA	CR43428
FBgn0004594	-12.6697	6.07353	17.1644	0.0023764	0.158058	chr3L	15657627	15658149	+	protein_coding	Eig71Eg
FBgn0043577	-12.7876	7.9618	20.852	0.00126479	0.130638	chr3L	16726540	16727288	+	protein_coding	PGRP-SB2
FBgn0053998	-14.3649	5.36895	10.1138	0.0181506	0.317437	chr2R	18738491	18739143	+	protein_coding	CG33998
FBgn0261630	-14.8907	5.8936	11.5846	0.0136442	0.28671	chr2L	8891439	8892180	+	protein_coding	CG42713
FBgn0052762	-16.8198	7.82125	22.4182	0.00288891	0.169059	chrX	5500207	5501229	-	protein_coding	CG32762
FBgn0029770	-17.2634	8.26469	25.8842	0.00199092	0.147961	chrX	5501475	5502782	+	protein_coding	CG4151

## Sheet: LB_M.R_DES_pv0.05_FC0.5
GeneID	logFC	logCPM	F	PValue	FDR	Chr	start	end	strand	function	name
FBgn0038718	8.95401	0.0713111	7.35685	0.029048	0.915666	chr3R	19610224	19612437	+	protein_coding	CG17752
FBgn0003357	8.02147	-0.66626	16.5362	0.00258944	0.915666	chr3R	29922215	29923455	+	protein_coding	Jon99Ciii
FBgn0046880	6.34508	0.743288	6.67098	0.0266928	0.915666	chr2R	19698713	19699346	-	protein_coding	Obp56b
FBgn0038509	5.82059	3.53286	5.17973	0.0478558	0.915666	chr3R	17421689	17422202	-	protein_coding	CG14332
FBgn0266143	5.30565	-2.49465	8.954	0.0126942	0.915666	chr2L	14019394	14020325	+	lincRNA	CR44849
FBgn0052274	5.21104	-1.31875	13.3543	0.00401313	0.915666	chr3L	3335578	3335788	-	protein_coding	Drsl1
FBgn0003356	5.20416	-0.282782	10.6503	0.00677674	0.915666	chr3R	29923753	29924615	-	protein_coding	Jon99Cii
FBgn0053128	5.15134	-0.823897	6.11362	0.0301441	0.915666	chr2L	1494069	1495456	+	protein_coding	CG33128
FBgn0039778	5.09397	-1.82577	9.24315	0.00905354	0.915666	chr3R	30488962	30489895	+	protein_coding	Jon99Fi
FBgn0265156	4.81698	-2.74132	6.8099	0.0249066	0.915666	chr3R	23011920	23012360	-	lincRNA	CR44225
FBgn0085790	4.74579	-2.73263	9.70854	0.0102182	0.915666	chrY	3026760	3028019	-	pseudogene	CR41507
FBgn0039325	4.73174	-1.53801	12.8877	0.00307653	0.915666	chr3R	25318549	25320101	-	protein_coding	CG10560
FBgn0034471	4.70053	-2.7488	6.23701	0.0303315	0.915666	chr2R	19712344	19712932	+	protein_coding	Obp56e
FBgn0032144	4.65784	-2.84988	7.33027	0.0279813	0.915666	chr2L	9769059	9770409	+	protein_coding	CG17633
FBgn0051080	4.61576	-2.85679	5.83241	0.043644	0.915666	chr3R	26633731	26634714	+	protein_coding	TwdlH
FBgn0029963	4.61197	-2.85743	6.2493	0.0383464	0.915666	chrX	7852480	7854244	-	protein_coding	CG10920
FBgn0265669	4.60117	-2.69579	7.64483	0.018946	0.915666	chr2L	18112829	18113179	-	protein_coding	CG44476
FBgn0039312	4.59635	-1.1447	8.25605	0.0131295	0.915666	chr3R	25278426	25279846	-	protein_coding	CG10514
FBgn0031929	4.5417	-2.8072	5.70961	0.0366384	0.915666	chr2L	7689310	7691061	-	protein_coding	CG18585
FBgn0260718	4.47819	-2.90062	7.71002	0.025206	0.915666	chr2L	21577204	21577676	-	pseudogene	CR42545
FBgn0265039	4.47442	-2.81756	7.87081	0.0176391	0.915666	chr3R	4660526	4660939	-	lincRNA	CR44156
FBgn0034819	4.41995	2.76463	11.4484	0.00671078	0.915666	chr2R	23085880	23086268	-	protein_coding	CG9877
FBgn0032181	4.35526	-2.85547	5.9166	0.0339895	0.915666	chr2L	10091207	10092389	-	protein_coding	CG13133
FBgn0040502	4.3261	-2.94588	5.52842	0.0481114	0.915666	chr2R	6179725	6180356	+	protein_coding	CG8343
FBgn0037677	4.23032	-2.76644	5.16376	0.0449243	0.915666	chr3R	9329222	9330331	-	protein_coding	CG12951
FBgn0051233	4.2077	-2.98537	7.3523	0.0278099	0.915666	chr3R	21749852	21753237	+	protein_coding	CG31233
FBgn0037124	4.20497	-2.74398	5.60761	0.0380357	0.915666	chr3L	21732805	21733487	-	protein_coding	CG14568
FBgn0035031	4.20496	-2.74058	6.55699	0.0271433	0.915666	chr2R	24597994	24599091	+	protein_coding	CG13587
FBgn0035887	4.20265	-2.98605	5.48646	0.0487735	0.915666	chr3L	8392819	8393649	-	protein_coding	Jon66Cii
FBgn0083042	4.17557	-2.98972	5.55399	0.0477137	0.915666	chrX	17145902	17146041	-	snoRNA	snoRNA:Psi18S-1854a
FBgn0033970	4.16583	1.2697	6.96369	0.0235536	0.915666	chr2R	14832831	14833951	+	protein_coding	CG10205
FBgn0038647	4.11178	0.279848	6.22601	0.0294488	0.915666	chr3R	18732680	18733034	+	protein_coding	CG14302
FBgn0262142	4.11065	-2.42302	6.20545	0.0306699	0.915666	chr2R	22666358	22666764	+	lincRNA	CR42868
FBgn0003961	4.08849	-0.172331	5.46828	0.0387992	0.915666	chr2L	7780084	7781415	+	protein_coding	Uro
FBgn0037204	4.08325	2.49322	10.5935	0.00797647	0.915666	chr3L	22898743	22900262	+	protein_coding	CG11131
FBgn0053281	4.05615	-1.13952	6.10348	0.0287296	0.915666	chr2L	3324236	3326637	+	protein_coding	CG33281
FBgn0263834	4.01535	-2.98573	5.77313	0.0357997	0.915666	chr3R	22296869	22297544	+	pseudogene	CR43696
FBgn0038190	3.99655	-2.94485	5.22173	0.043943	0.915666	chr3R	13949453	13951138	-	protein_coding	CG9926
FBgn0260396	3.98775	-2.86996	6.66339	0.026174	0.915666	chr3L	10623065	10623576	-	protein_coding	CG42521
FBgn0266615	3.97785	-2.95415	5.16036	0.0449826	0.915666	chr3R	13044156	13044529	+	protein_coding	CG45122
FBgn0038717	3.97679	-1.1049	6.01867	0.035742	0.915666	chr3R	19607253	19609322	+	protein_coding	CG17751
FBgn0040350	3.89769	-1.88925	13.7263	0.00245713	0.915666	chrX	948584	951900	-	protein_coding	CG3690
FBgn0067861	3.82424	-2.86702	4.87928	0.050145	0.915666	chrX	20174216	20178638	-	protein_coding	Sdic1
FBgn0259998	3.82212	-3.03118	6.28277	0.0298489	0.915666	chr2L	20255987	20257192	-	protein_coding	CG17571
FBgn0263314	3.7953	-2.404	7.44277	0.0202144	0.915666	chr2L	8490738	8491360	+	protein_coding	CG43400
FBgn0262354	3.79361	-3.03634	5.23159	0.0437788	0.915666	chr2L	14352076	14352619	+	protein_coding	CG43052
FBgn0004189	3.78752	-3.03702	5.57511	0.0384944	0.915666	chr3R	24556691	24556798	+	snRNA	snRNA:U6:96Ab
FBgn0036601	3.78429	-1.53212	13.8373	0.00238651	0.915666	chr3L	16306599	16307205	+	protein_coding	CG13063
FBgn0033593	3.64347	3.67028	7.11079	0.0243037	0.915666	chr2R	11241744	11242194	-	protein_coding	Listericin
FBgn0010038	3.6288	1.63422	9.44489	0.0103572	0.915666	chr3R	12371970	12372704	+	protein_coding	GstD2
FBgn0053341	3.57628	-3.08229	5.05921	0.0467624	0.915666	chr3R	24368357	24369419	+	protein_coding	CG33341
FBgn0038122	3.56779	-2.98499	6.75887	0.0253394	0.915666	chr3R	13181303	13182154	+	protein_coding	CG8138
FBgn0050376	3.56421	-2.1527	5.79953	0.0308213	0.915666	chr2R	8263485	8264426	-	protein_coding	CG30376
FBgn0035661	3.5465	-2.94748	5.41846	0.0408019	0.915666	chr3L	6033198	6034611	-	protein_coding	CG10477
FBgn0028864	3.53001	-2.99609	5.73043	0.0363609	0.915666	chr2L	15661040	15662753	+	protein_coding	CG18477
FBgn0040735	3.47409	-0.405106	8.87745	0.0106283	0.915666	chr2R	18388994	18389443	+	protein_coding	CG16836
FBgn0039106	3.46731	-2.70151	6.31297	0.0295354	0.915666	chr3R	23710157	23711338	+	protein_coding	CG10301
FBgn0264679	3.45394	-2.62309	5.84599	0.0302622	0.915666	chr2R	18775410	18777166	+	lincRNA	CR43964
FBgn0041233	3.424	-2.35125	4.88555	0.0447353	0.915666	chr2R	23541053	23542379	-	protein_coding	Gr59e
FBgn0032913	3.32917	-0.546258	7.93602	0.014477	0.915666	chr2L	21089374	21090999	+	protein_coding	CG9259
FBgn0261932	3.28364	1.85593	5.00754	0.0477215	0.915666	chr3R	17406677	17407534	+	protein_coding	CG42798
FBgn0031653	3.28114	-2.12473	5.57762	0.0336646	0.915666	chr2L	4949940	4950767	-	protein_coding	Jon25Biii
FBgn0267012	3.26572	-2.77709	5.55561	0.0387728	0.915666	chr2L	9325844	9326721	+	lincRNA	CR45456
FBgn0001285	3.26057	-2.44645	5.96951	0.0333501	0.915666	chr2R	8691447	8692844	+	protein_coding	Jon44E
FBgn0031409	3.25371	-2.7792	7.52841	0.0196647	0.915666	chr2L	2285162	2285926	+	protein_coding	CG4271
FBgn0039752	3.234	0.4624	10.4729	0.00645837	0.915666	chr3R	30177876	30180178	+	protein_coding	CG15530
FBgn0267770	3.21494	-2.7339	5.57463	0.033705	0.915666	chr3R	25657392	25658274	+	lincRNA	CR46101
FBgn0002922	3.12517	-2.02815	7.03422	0.0192992	0.915666	chr3R	23712813	23718357	-	protein_coding	nau
FBgn0032753	3.09582	-0.952519	7.67054	0.0153688	0.915666	chr2L	19071130	19074149	-	protein_coding	CG17572
FBgn0266327	3.07539	-2.34744	4.73396	0.0477039	0.915666	chr2L	8703474	8705450	+	lincRNA	CR44992
FBgn0262529	2.92763	2.3421	5.38088	0.0417607	0.915666	chr3L	15648570	15649125	+	protein_coding	CG43083
FBgn0028537	2.88898	0.361343	6.07504	0.0292823	0.915666	chr2L	14737089	14737769	-	protein_coding	CG31775
FBgn0035886	2.88014	-1.00474	5.81257	0.0307502	0.915666	chr3L	8391539	8392377	+	protein_coding	Jon66Ci
FBgn0038516	2.88002	-2.39138	5.79196	0.0309135	0.915666	chr3R	17534814	17537136	+	protein_coding	P5cr-2
FBgn0040257	2.84574	-1.83402	6.20646	0.0263058	0.915666	chr3R	11154625	11156513	+	protein_coding	Ugt86Dc
FBgn0036359	2.84563	-1.72212	6.64024	0.0223199	0.915666	chr3L	13425890	13426673	-	protein_coding	CG14105
FBgn0031010	2.75973	-2.41841	5.73918	0.0315657	0.915666	chrX	19277175	19280349	-	protein_coding	CG8028
FBgn0040338	2.73595	-1.80465	8.33597	0.0122179	0.915666	chrX	1011100	1011643	-	protein_coding	TfIIA-S-2
FBgn0020638	2.70822	-2.82299	4.63799	0.0497038	0.915666	chr3L	6134696	6135274	-	protein_coding	Lcp65Ag1
FBgn0019940	2.68174	0.392481	6.31993	0.0263919	0.915666	chr3R	15483157	15484699	+	protein_coding	Rh6
FBgn0015035	2.65086	-0.651236	6.57447	0.0228763	0.915666	chr2L	9747838	9750071	-	protein_coding	Cyp4e3
FBgn0031613	2.62907	-2.24099	4.95277	0.0434891	0.915666	chr2L	4577718	4578218	-	protein_coding	HP6
FBgn0262878	2.61148	-1.70593	7.65962	0.0154279	0.915666	chr2L	20472792	20473385	-	protein_coding	CG43233
FBgn0032754	2.52152	-1.72437	4.88558	0.0447347	0.915666	chr2L	19077275	19079028	-	protein_coding	CG10700
FBgn0085512	2.42575	-2.5177	5.2136	0.0390252	0.915666	chr2R	3647345	3647765	+	protein_coding	RYa
FBgn0263321	2.41149	1.83456	5.16153	0.0436558	0.915666	chr2L	1442626	1443832	+	protein_coding	CG43402
FBgn0266912	2.37908	-1.361	9.01289	0.00975611	0.915666	chr2L	3475364	3476058	+	lincRNA	CR45372
FBgn0037013	2.37006	-2.12016	5.44197	0.0355545	0.915666	chr3L	20533708	20535335	+	protein_coding	CG13250
FBgn0053504	2.32476	-2.09346	4.71842	0.0480213	0.915666	chr3L	3593822	3593893	+	snRNA	snRNA:U7
FBgn0037288	2.31057	-0.0692081	9.07493	0.00956077	0.915666	chr3R	4953505	4955252	-	protein_coding	CG14661
FBgn0029762	2.30285	2.4217	5.16864	0.0441614	0.915666	chrX	5405237	5410849	-	protein_coding	NAAT1
FBgn0032381	2.27333	-1.35007	5.63189	0.0329419	0.915666	chr2L	11847225	11849169	+	protein_coding	Mal-B1
FBgn0051810	2.26738	0.824012	6.04389	0.0289055	0.915666	chr2L	16849017	16852368	-	protein_coding	CG31810
FBgn0034468	2.26276	4.88463	5.59607	0.0404332	0.915666	chr2R	19697722	19698508	+	protein_coding	Obp56a
FBgn0036939	2.24509	-1.21328	5.01227	0.0424201	0.915666	chr3L	20124297	20127381	-	protein_coding	CG7365
FBgn0033292	2.2391	-1.19427	10.9911	0.00527431	0.915666	chr2R	8439394	8442806	-	protein_coding	Cyp4ad1
FBgn0264675	2.22965	-2.10346	5.50177	0.0347064	0.915666	chrX	12043697	12116041	+	lincRNA	CR43960
FBgn0035545	2.21842	0.55608	4.73654	0.049448	0.915666	chr3L	4446572	4448072	+	protein_coding	CG12607
FBgn0002772	2.12602	4.30441	8.96951	0.0129687	0.915666	chr3R	27657077	27660177	-	protein_coding	Mlc1
FBgn0002773	2.10004	6.16604	8.1774	0.0173943	0.915666	chr3R	30171437	30174551	-	protein_coding	Mlc2
FBgn0033129	2.07563	0.0224495	5.18991	0.0395377	0.915666	chr2R	7033561	7034920	+	protein_coding	Tsp42Eh
FBgn0035985	2.05973	2.23956	8.29294	0.0134001	0.915666	chr3L	9404796	9406174	+	protein_coding	Cpr67B
FBgn0261628	2.05101	2.15539	14.8812	0.00182491	0.915666	chr2L	13930321	13931362	-	protein_coding	CG42711
FBgn0033518	2.00603	0.0425257	6.13329	0.0270574	0.915666	chr2R	10418717	10419761	+	protein_coding	Prx2540-2
FBgn0266974	2.00106	-0.899045	8.22571	0.012684	0.915666	chr3L	2503788	2504397	+	lincRNA	CR45425
FBgn0014863	1.99923	3.62341	8.68165	0.013175	0.915666	chr3R	7112849	7117732	-	protein_coding	Mlp84B
FBgn0004028	1.99431	4.97168	12.3123	0.00514207	0.915666	chrX	18105567	18116922	-	protein_coding	wupA
FBgn0267185	1.98829	0.806738	8.15373	0.0129993	0.915666	chrX	12912559	12913009	+	lincRNA	CR45625
FBgn0031547	1.98482	2.03031	10.3439	0.00651189	0.915666	chr2L	3522520	3524056	-	protein_coding	Sr-CIV
FBgn0266446	1.98302	3.71372	9.38666	0.0105901	0.915666	chr3R	10768000	10777374	-	protein_coding	CG45076
FBgn0000120	1.98065	-0.0928492	5.47681	0.0350574	0.915666	chr2L	18078268	18081307	+	protein_coding	Arr1
FBgn0037731	1.9802	0.204401	6.22571	0.0261121	0.915666	chr3R	9685759	9687141	+	protein_coding	CG18542
FBgn0085223	1.97981	-0.177691	11.0403	0.00519803	0.915666	chr2R	17544189	17545045	+	protein_coding	CG34194
FBgn0039299	1.96031	2.8369	5.88735	0.0331299	0.915666	chr3R	25242019	25243262	+	protein_coding	CG11854
FBgn0086031	1.95852	-1.42065	5.40526	0.0360871	0.915666	chr2L	865365	865493	-	snoRNA	snoRNA:Me28S-U1230
FBgn0004117	1.95456	4.89047	9.38987	0.0115194	0.915666	chr3R	15310192	15315197	+	protein_coding	Tm2
FBgn0264695	1.92712	4.53224	5.87185	0.0358227	0.915666	chr2L	16766565	16788766	+	protein_coding	Mhc
FBgn0033658	1.90216	-0.178945	7.03119	0.0193206	0.915666	chr2R	11862536	11863252	-	protein_coding	TwdlBeta
FBgn0004169	1.87848	5.43615	6.12203	0.0331604	0.915666	chrX	13593473	13602578	-	protein_coding	up
FBgn0039316	1.86285	1.67853	9.77348	0.00764706	0.915666	chr3R	25289888	25291366	+	protein_coding	CG11893
FBgn0259219	1.85604	3.53181	7.17544	0.0212931	0.915666	chr2R	13260100	13266336	+	protein_coding	CG42319
FBgn0259209	1.73751	2.8589	5.85376	0.0328816	0.915666	chr2R	24074601	24078223	+	protein_coding	Mlp60A
FBgn0035917	1.72941	4.82635	9.61801	0.0103801	0.915666	chr3L	8624370	8638813	+	protein_coding	Zasp66
FBgn0000044	1.72828	6.95766	7.52131	0.0206479	0.915666	chr2R	20944020	20946431	+	protein_coding	Act57B
FBgn0038294	1.71578	5.74156	19.9578	0.000852642	0.880679	chr3R	15170624	15181510	-	protein_coding	Mf
FBgn0262722	1.6731	-1.14535	6.00125	0.0284783	0.915666	chr3R	24825790	24826471	-	lincRNA	CR43166
FBgn0003149	1.64411	4.51578	12.7609	0.00407789	0.915666	chr3L	8732857	8745310	-	protein_coding	Prm
FBgn0035813	1.64038	3.15578	8.45804	0.0127887	0.915666	chr3L	7727803	7732191	-	protein_coding	CG8492
FBgn0264343	1.62245	0.102238	4.74414	0.0474974	0.915666	chr2L	7227733	7228641	+	protein_coding	CG43799
FBgn0036377	1.61153	-1.22634	4.66961	0.0490341	0.915666	chr3L	13516272	13519605	-	protein_coding	CG10710
FBgn0033307	1.60411	-1.25334	4.83783	0.0456456	0.915666	chr2R	8590496	8591948	+	protein_coding	CG14752
FBgn0069056	1.59068	-0.839349	4.76067	0.0471644	0.915666	chr2R	21538249	21539293	-	protein_coding	CG33226
FBgn0063492	1.57599	1.77186	16.488	0.00123222	0.915666	chr2R	18407833	18408955	+	protein_coding	GstE8
FBgn0002789	1.50824	5.19908	8.08882	0.0163347	0.915666	chr2R	13246669	13248880	+	protein_coding	Mp20
FBgn0014033	1.50412	5.8165	6.2417	0.0312417	0.915666	chr2L	4121701	4124153	+	protein_coding	Sr-CI
FBgn0030357	1.47163	4.17021	5.74983	0.0356988	0.915666	chrX	11920003	11924662	-	protein_coding	Sclp
FBgn0039667	1.46232	0.451195	8.95934	0.00992842	0.915666	chr3R	29494781	29498923	+	protein_coding	CG2010
FBgn0033520	1.46103	-0.373025	5.12176	0.0405325	0.915666	chr2R	10424435	10425471	+	protein_coding	Prx2540-1
FBgn0038774	1.43272	2.69908	5.90415	0.0307346	0.915666	chr3R	20169434	20174872	+	protein_coding	CG5023
FBgn0034972	1.42398	-0.197254	10.0756	0.00695959	0.915666	chr2R	24078233	24080527	-	protein_coding	CG10339
FBgn0000045	1.39825	-0.294283	5.68204	0.0322901	0.915666	chr3L	21985209	21987190	+	protein_coding	Act79B
FBgn0035496	1.37521	2.77669	5.87075	0.031041	0.915666	chr3L	4093206	4094344	+	protein_coding	CG14990
FBgn0035587	1.36988	0.843795	4.69362	0.0485328	0.915666	chr3L	5141952	5144317	+	protein_coding	CG4623
FBgn0262588	1.36126	1.84867	4.87982	0.0449854	0.915666	chr3R	28262734	28263622	-	protein_coding	CG43125
FBgn0037684	1.36046	0.668959	5.01857	0.0423086	0.915666	chr3R	9365397	9367763	+	protein_coding	CG8129
FBgn0031908	1.35398	4.36093	7.1343	0.0213372	0.915666	chr2L	7405226	7408600	+	protein_coding	CG5177
FBgn0002868	1.34796	7.41664	11.0352	0.00657174	0.915666	chr3R	9783406	9784370	-	protein_coding	MtnA
FBgn0262587	1.34415	4.17559	5.6668	0.0363255	0.915666	chr3R	28263870	28264773	-	protein_coding	CG43124
FBgn0033691	1.33746	-0.685075	5.75191	0.031407	0.915666	chr2R	12179482	12179902	-	protein_coding	CG8860
FBgn0034924	1.33608	0.352595	6.68341	0.0219633	0.915666	chr2R	23895062	23896997	+	protein_coding	CG17658
FBgn0029831	1.31744	2.69426	7.31892	0.0174114	0.915666	chrX	5988790	5992640	+	protein_coding	CG5966
FBgn0034140	1.31617	4.15174	6.10798	0.0305525	0.915666	chr2R	16574578	16576586	-	protein_coding	CG8317
FBgn0031689	1.31388	5.17373	11.5296	0.00542334	0.915666	chr2L	5210459	5212445	+	protein_coding	Cyp28d1
FBgn0040496	1.31136	2.55444	5.39397	0.0369863	0.915666	chr2L	10677197	10679707	+	protein_coding	CG17104
FBgn0263655	1.31091	-0.0670554	8.95801	0.00993273	0.915666	chr2R	7018759	7019390	+	protein_coding	CG43646
FBgn0262533	1.3067	0.562859	6.92311	0.0201	0.915666	chr3L	17874714	17876573	+	pseudogene	CR43087
FBgn0031634	1.30577	0.132036	8.97295	0.00988429	0.915666	chr2L	4830845	4835300	-	protein_coding	Ir25a
FBgn0003046	1.29543	3.18388	5.90088	0.0310425	0.915666	chr2L	7021681	7022470	+	protein_coding	Pcp
FBgn0010424	1.29062	5.10861	6.23011	0.0300269	0.915666	chr3L	17046062	17048390	+	protein_coding	TpnC73F
FBgn0000046	1.27859	4.69893	6.58163	0.0261235	0.915666	chr3R	13425982	13428375	+	protein_coding	Act87E
FBgn0031548	1.26365	0.536296	8.15882	0.0129767	0.915666	chr2L	3525130	3527588	+	protein_coding	CG8852
FBgn0043854	1.25013	-0.87474	5.00771	0.0425008	0.915666	chr2L	6372387	6377284	+	protein_coding	slam
FBgn0265356	1.24127	3.85876	5.74825	0.0340906	0.915666	chr2R	18987343	19008944	+	protein_coding	tn
FBgn0266361	1.22769	1.20711	5.88381	0.0298159	0.915666	chrX	23007671	23009452	+	lincRNA	CR45009
FBgn0034920	1.22398	2.05034	5.96309	0.0289051	0.915666	chr2R	23886972	23888777	+	protein_coding	CG5597
FBgn0036778	1.22356	0.59586	7.06499	0.0190841	0.915666	chr3L	18128939	18132689	-	protein_coding	Cyp312a1
FBgn0033204	1.22148	2.42361	6.30168	0.0253639	0.915666	chr2R	7663785	7665269	+	protein_coding	CG2065
FBgn0034479	1.21237	1.95166	4.87434	0.0449473	0.915666	chr2R	19979241	19984895	+	protein_coding	CG8654
FBgn0063494	1.20694	4.352	4.93785	0.0480585	0.915666	chr2R	18406010	18406761	+	protein_coding	GstE6
FBgn0033574	1.20157	4.63819	8.73196	0.0121853	0.915666	chr2R	10938424	10941738	-	protein_coding	Spn47C
FBgn0031857	1.18433	-0.475863	4.70572	0.0482824	0.915666	chr2L	6759828	6772755	-	protein_coding	CG11321
FBgn0034856	1.18073	2.74845	6.02631	0.0282019	0.915666	chr2R	23381196	23382591	+	protein_coding	yellow-d2
FBgn0264489	1.16331	5.15536	12.1951	0.00420828	0.915666	chr3L	9813846	9834345	+	protein_coding	CG43897
FBgn0029766	1.16164	7.63967	8.17767	0.0151509	0.915666	chrX	5429570	5432526	+	protein_coding	CG15784
FBgn0065098	1.15576	0.745073	4.7145	0.0481017	0.915666	chr3R	23730047	23730429	-	lincRNA	RNaseMRP:RNA
FBgn0263118	1.15509	2.62216	7.66786	0.0153833	0.915666	chr3R	26440777	26448991	+	protein_coding	tx
FBgn0264265	1.15408	-0.107533	5.05898	0.0416023	0.915666	chr2L	22239182	22239713	-	lincRNA	CR43765
FBgn0039742	1.14685	0.197361	6.49515	0.023569	0.915666	chr3R	30048634	30052112	-	protein_coding	CG15528
FBgn0031926	1.10053	4.42725	8.56757	0.0122794	0.915666	chr2L	7608388	7616533	+	protein_coding	CG6739
FBgn0030272	1.09853	4.30603	7.43373	0.0180909	0.915666	chrX	11144119	11144809	+	protein_coding	CG15201
FBgn0262620	1.09392	3.16591	10.3755	0.00634677	0.915666	chr2L	21657624	21658249	+	lincRNA	CR43144
FBgn0037751	1.09239	-0.291322	5.20683	0.0391341	0.915666	chr3R	9775120	9777943	+	protein_coding	topi
FBgn0266758	1.06221	5.53641	6.93955	0.0226355	0.915666	chr3R	24544718	24556549	+	protein_coding	Esyt2
FBgn0266534	1.05716	1.83718	4.68695	0.0486715	0.915666	chr3R	25102552	25103617	+	protein_coding	CG45095
FBgn0011695	1.04803	3.99347	13.9524	0.00231563	0.915666	chr2R	24026171	24027518	+	protein_coding	PebIII
FBgn0038629	1.04643	1.04011	5.84478	0.0302766	0.915666	chr3R	18592800	18621327	-	protein_coding	CG14304
FBgn0035501	1.03803	4.77118	6.28781	0.0279782	0.915666	chr3L	4148695	4152473	+	protein_coding	CG1299
FBgn0034733	1.02001	1.98718	5.13144	0.0403705	0.915666	chr2R	22478378	22483054	+	protein_coding	CG4752
FBgn0034365	1.00787	4.0402	10.196	0.00670556	0.915666	chr2R	18621540	18622986	+	protein_coding	CG5335
FBgn0265180	0.990967	4.57714	6.61641	0.024235	0.915666	chr2R	21200482	21212969	+	protein_coding	CG44245
FBgn0031975	0.977798	4.02244	7.37083	0.0175653	0.915666	chr2L	8011404	8026898	+	protein_coding	Tg
FBgn0032322	0.96564	3.42998	4.67737	0.0497869	0.915666	chr2L	10972279	10973408	+	protein_coding	CG16743
FBgn0030309	0.947655	6.9314	6.5696	0.0255709	0.915666	chrX	11555049	11558654	-	protein_coding	CG1572
FBgn0034219	0.940615	5.18691	9.21569	0.00969456	0.915666	chr2R	17445184	17447483	-	protein_coding	mthl4
FBgn0062978	0.940591	4.15508	6.40425	0.0253539	0.915666	chr2L	16704285	16716195	-	protein_coding	CG31808
FBgn0035431	0.937785	2.53119	5.7861	0.0309851	0.915666	chr3L	3299335	3303112	-	protein_coding	CG14968
FBgn0086711	0.922435	2.91399	7.82681	0.0145514	0.915666	chr2L	14975746	14997559	-	protein_coding	mol
FBgn0265651	0.921352	1.44985	5.38119	0.0364414	0.915666	chr2R	15371694	15372595	+	lincRNA	CR44458
FBgn0028699	0.911582	5.21397	13.0068	0.00297843	0.915666	chr3L	4910367	4920198	+	protein_coding	Rh50
FBgn0033174	0.908241	2.79814	10.8364	0.0055227	0.915666	chr2R	7447472	7449995	+	protein_coding	CG11125
FBgn0264950	0.898573	0.948795	6.94552	0.0199354	0.915666	chr2L	8201556	8205298	+	lincRNA	CR44119
FBgn0032899	0.898274	6.36427	11.2278	0.00534059	0.915666	chr2L	20865214	20867709	+	protein_coding	CG9338
FBgn0085229	0.892893	4.10521	9.05482	0.00962358	0.915666	chr2R	5757661	5758067	+	protein_coding	CG34200
FBgn0266624	0.889942	1.48129	6.35634	0.0248411	0.915666	chr2R	7631494	7635219	-	lincRNA	CR45131
FBgn0010482	0.881044	3.0877	4.94075	0.0437089	0.915666	chr2R	6721100	6740672	-	protein_coding	l(2)01289
FBgn0033919	0.876533	6.27508	15.0808	0.00173973	0.915666	chr2R	14261205	14267919	-	protein_coding	CG8547
FBgn0035708	0.874736	3.88648	5.92534	0.0296166	0.915666	chr3L	6609324	6619113	+	protein_coding	CG8398
FBgn0052205	0.874343	3.77847	14.0449	0.00226047	0.915666	chr3L	19422837	19424183	-	pseudogene	CR32205
FBgn0034191	0.862508	3.30649	17.275	0.00102497	0.899874	chr2R	17091983	17093070	+	protein_coding	CG6984
FBgn0040259	0.858015	4.96131	7.79565	0.0152934	0.915666	chr3R	11157097	11159744	+	protein_coding	Ugt86Da
FBgn0032706	0.856152	3.85286	9.5385	0.00823648	0.915666	chr2L	18711070	18713748	-	protein_coding	Irk3
FBgn0050195	0.854089	1.61645	5.21169	0.0390559	0.915666	chr2R	22646615	22647245	-	protein_coding	CG30195
FBgn0004652	0.852521	6.65945	11.2761	0.00510878	0.915666	chr3R	18414272	18545586	-	protein_coding	fru
FBgn0030234	0.848503	3.59944	5.64388	0.0327846	0.915666	chrX	10772540	10778981	+	protein_coding	CG15211
FBgn0034399	0.846591	5.33921	5.60772	0.0355048	0.915666	chr2R	18835262	18836842	+	protein_coding	CG15083
FBgn0039118	0.846352	2.74158	6.63925	0.0223282	0.915666	chr3R	23772997	23774127	-	protein_coding	CG10208
FBgn0039896	0.834202	1.46455	4.67858	0.0488462	0.915666	chr4	227921	230428	+	protein_coding	yellow-h
FBgn0035578	0.828607	3.98841	6.98149	0.0196745	0.915666	chr3L	4837790	4840108	-	protein_coding	CG13707
FBgn0026197	0.828314	6.97698	5.00325	0.0459575	0.915666	chr3L	17400346	17401348	-	protein_coding	noe
FBgn0033448	0.827786	4.69645	7.88733	0.014519	0.915666	chr2R	9828103	9836642	-	protein_coding	hebe
FBgn0036876	0.827284	4.10858	5.48	0.0357291	0.915666	chr3L	19498196	19500798	-	protein_coding	CG9451
FBgn0036145	0.822571	6.08395	5.1932	0.0426608	0.915666	chr3L	11199619	11200587	+	protein_coding	CG7607
FBgn0038088	0.821226	5.42679	10.8482	0.00550324	0.915666	chr3R	12855543	12859246	-	protein_coding	CG10126
FBgn0010397	0.819494	6.05692	5.46708	0.038164	0.915666	chr2R	14570809	14575771	-	protein_coding	LamC
FBgn0039897	0.80878	4.84173	12.6938	0.00324429	0.915666	chr4	230729	245903	+	protein_coding	CG1674
FBgn0052582	0.800126	0.704334	5.12755	0.0404355	0.915666	chrX	15835600	15836923	+	lincRNA	CR32582
FBgn0034406	0.797454	4.5706	4.87162	0.0468057	0.915666	chr2R	18860374	18862078	-	protein_coding	Jheh3
FBgn0027581	0.783592	1.23001	5.06869	0.0414347	0.915666	chr2R	13580312	13593339	-	protein_coding	CG6191
FBgn0035499	0.782362	8.21418	6.65074	0.0234083	0.915666	chr3L	4114288	4122388	-	protein_coding	Chd64
FBgn0262954	0.781483	5.33202	13.2274	0.00280613	0.915666	chr2R	15144967	15145519	-	protein_coding	Rpb12
FBgn0014073	0.779993	2.89622	5.33719	0.0370999	0.915666	chr3L	4510697	4532145	-	protein_coding	Tie
FBgn0034194	0.764315	5.21199	10.7653	0.00564135	0.915666	chr2R	17108843	17114360	+	protein_coding	CG15611
FBgn0033153	0.75653	5.40246	5.68156	0.033829	0.915666	chr2R	7249160	7250655	+	protein_coding	Gadd45
FBgn0026602	0.753223	6.29404	5.06929	0.0443778	0.915666	chr2R	7243023	7245776	-	protein_coding	Ady43A
FBgn0037046	0.749093	2.87028	11.7164	0.00426887	0.915666	chr3L	21033553	21034203	-	protein_coding	CG10581
FBgn0038020	0.741245	4.64348	4.99504	0.0439879	0.915666	chr3R	12366162	12367564	-	protein_coding	GstD9
FBgn0267635	0.736411	1.94504	5.4475	0.0354749	0.915666	chr3L	20404269	20407558	+	lincRNA	CR45973
FBgn0264834	0.733777	3.38101	8.12914	0.0131092	0.915666	chr2R	1348166	1349167	-	lincRNA	CR44042
FBgn0028550	0.729607	4.63621	13.5002	0.00260867	0.915666	chrX	1242739	1275284	-	protein_coding	Atf3
FBgn0038665	0.724852	2.1532	5.10957	0.0407377	0.915666	chr3R	18978272	18978809	-	protein_coding	CG12269
FBgn0035868	0.722115	2.77483	5.30641	0.0375687	0.915666	chr3L	8302363	8304059	-	protein_coding	CG7194
FBgn0038063	0.718565	2.37054	5.9227	0.0293649	0.915666	chr3R	12550624	12595725	-	protein_coding	Octbeta2R
FBgn0036461	0.712638	3.74087	8.48859	0.0116053	0.915666	chr3L	14992288	14997983	+	protein_coding	Zip71B
FBgn0031263	0.710463	3.36753	4.77752	0.0468276	0.915666	chr2L	559611	560523	+	protein_coding	CG2789
FBgn0261552	0.70006	6.60283	9.58246	0.00812231	0.915666	chr3R	9417939	9455500	+	protein_coding	ps
FBgn0264745	0.69584	3.00563	5.89552	0.0296792	0.915666	chr2L	3171034	3172799	-	pseudogene	CR44003
FBgn0038343	0.695423	3.08117	6.41965	0.0242512	0.915666	chr3R	15484729	15485396	-	protein_coding	Trissin
FBgn0031258	0.694186	2.90832	7.39427	0.0169483	0.915666	chr2L	458875	472200	-	protein_coding	CG4297
FBgn0032336	0.693796	3.08236	5.20125	0.0392241	0.915666	chr2L	11076164	11081399	-	protein_coding	AstC
FBgn0024912	0.692211	3.55075	7.94288	0.0139769	0.915666	chr3R	6659407	6660100	-	protein_coding	agt
FBgn0016694	0.683491	5.03502	11.652	0.0043486	0.915666	chr3L	7811457	7867369	-	protein_coding	Pdp1
FBgn0083970	0.680518	1.81381	4.96182	0.0433245	0.915666	chr2L	8190296	8190781	-	protein_coding	CG34134
FBgn0085279	0.673489	2.80469	5.60439	0.0333058	0.915666	chr3L	17476221	17477103	+	protein_coding	CG34250
FBgn0037898	0.671653	2.54158	8.61098	0.0111397	0.915666	chr3R	11430060	11430762	+	protein_coding	CG18643
FBgn0035996	0.670889	3.34623	9.43051	0.0085249	0.915666	chr3L	9450544	9451572	-	protein_coding	CG3448
FBgn0014141	0.660029	7.8708	4.70784	0.0500028	0.915666	chr3R	17091532	17125389	-	protein_coding	cher
FBgn0015541	0.654811	6.77915	8.253	0.0125668	0.915666	chr3R	26915760	26945309	+	protein_coding	sda
FBgn0024315	0.647353	6.38977	16.3855	0.00126263	0.915666	chr2R	16655322	16667675	-	protein_coding	Picot
FBgn0001078	0.641315	5.52404	6.08527	0.0278925	0.915666	chr3L	18750606	18801309	-	protein_coding	ftz-f1
FBgn0040907	0.640872	4.0272	6.44091	0.0240568	0.915666	chrX	4321763	4322231	-	protein_coding	mRpL33
FBgn0035710	0.640419	6.84016	12.8457	0.00311196	0.915666	chr3L	6689326	6703521	-	protein_coding	SP1173
FBgn0016726	0.63816	9.48649	6.35857	0.0249173	0.915666	chr2R	21293767	21294404	+	protein_coding	RpL29
FBgn0020414	0.635143	7.52496	6.83506	0.0208074	0.915666	chr2L	16450906	16455194	+	protein_coding	Idgf3
FBgn0050069	0.629569	6.25558	8.21673	0.0127229	0.915666	chr2R	14185203	14198368	+	protein_coding	CG30069
FBgn0027552	0.621646	4.90329	7.11941	0.0187103	0.915666	chr3L	3941007	3942465	-	protein_coding	CG10863
FBgn0038313	0.617606	2.769	6.7808	0.0211829	0.915666	chr3R	15275521	15276474	+	protein_coding	CG4338
FBgn0030704	0.606633	3.86523	11.0188	0.00523111	0.915666	chrX	15890588	15891547	+	protein_coding	CG15916
FBgn0028956	0.606313	6.65479	9.21016	0.00915051	0.915666	chr2R	17448532	17452598	-	protein_coding	mthl3
FBgn0050460	0.597809	5.52366	8.16453	0.0129515	0.915666	chr2R	17065970	17087633	-	protein_coding	CG30460
FBgn0011274	0.595498	4.64767	7.87034	0.0143328	0.915666	chr2L	17413247	17433161	-	protein_coding	Dif
FBgn0062928	0.586975	4.95847	7.5048	0.0162947	0.915666	chr3L	19486745	19488439	-	pseudogene	pncr009:3L
FBgn0032156	0.581478	6.17449	6.43379	0.0242366	0.915666	chr2L	9903278	9908633	-	protein_coding	CG13124
FBgn0034398	0.569292	8.8325	5.46517	0.0352226	0.915666	chr2R	18833371	18834775	-	protein_coding	CG15098
FBgn0020270	0.566849	6.04256	7.63482	0.0155631	0.915666	chr2L	11282089	11284335	+	protein_coding	mre11
FBgn0086347	0.564519	6.50976	4.65832	0.0503616	0.915666	chr2L	10491813	10506779	-	protein_coding	Myo31DF
FBgn0014342	0.559406	3.38262	5.27868	0.0379971	0.915666	chr3R	5548114	5551168	-	protein_coding	mia
FBgn0033945	0.55828	3.49683	7.52276	0.0161913	0.915666	chr2R	14604548	14605297	-	protein_coding	CG12868
FBgn0260632	0.554505	5.39677	6.40359	0.0243993	0.915666	chr2L	17436829	17450364	-	protein_coding	dl
FBgn0030883	0.550899	3.56786	7.55148	0.0160275	0.915666	chrX	17906030	17907261	-	protein_coding	CG7772
FBgn0261599	0.549202	11.266	9.53241	0.00825243	0.915666	chr3R	9778041	9779528	+	protein_coding	RpS29
FBgn0023534	0.546516	3.46756	5.39465	0.0362428	0.915666	chrX	494613	496369	+	protein_coding	CG17778
FBgn0036765	0.543619	3.0677	5.28847	0.0378452	0.915666	chr3L	17879095	17883653	+	protein_coding	CG7408
FBgn0036501	0.539437	3.95025	5.44487	0.0355128	0.915666	chr3L	15500937	15503769	+	protein_coding	CG7272
FBgn0058191	0.538555	7.47436	12.2057	0.00371549	0.915666	chr2R	1264139	1267747	+	protein_coding	CG40191
FBgn0032001	0.535206	4.50221	8.00037	0.0137021	0.915666	chr2L	8212958	8214135	+	protein_coding	CG8360
FBgn0001168	0.530828	5.84773	4.81679	0.0462932	0.915666	chr3L	8675758	8679253	+	protein_coding	h
FBgn0026090	0.529377	5.43882	9.34495	0.00876175	0.915666	chrX	1857888	1858971	-	protein_coding	CG14812
FBgn0033504	0.526765	6.17197	5.27439	0.03821	0.915666	chr2R	10269015	10307024	+	protein_coding	CAP
FBgn0039328	0.524335	4.00229	5.78909	0.0309486	0.915666	chr3R	25329529	25331203	-	protein_coding	CHKov2
FBgn0038446	0.52284	4.18219	7.31219	0.0174534	0.915666	chr3R	16573178	16573752	-	protein_coding	CG14903
FBgn0034245	0.522203	4.36707	4.61661	0.0501628	0.915666	chr2R	17572095	17572784	-	protein_coding	CG14482
FBgn0031322	0.520839	4.82085	4.95671	0.0434173	0.915666	chr2L	1185756	1196807	+	protein_coding	CG5001
FBgn0086708	0.51818	5.58644	4.63129	0.0498472	0.915666	chr3L	13477540	13483515	+	protein_coding	stv
FBgn0038966	0.514982	3.98743	4.78223	0.0467342	0.915666	chr3R	22423315	22424929	-	protein_coding	pinta
FBgn0052638	0.511404	5.50036	6.55647	0.0230314	0.915666	chrX	13122875	13128794	-	protein_coding	CG32638
FBgn0050466	0.510314	3.5332	7.3468	0.0172383	0.915666	chr2R	15568959	15573170	+	protein_coding	CG30466
FBgn0052195	0.509118	4.46609	5.7507	0.031422	0.915666	chr3L	18112958	18119150	+	protein_coding	CG32195
FBgn0036126	0.508731	4.46955	6.05759	0.0278615	0.915666	chr3L	11097445	11098186	-	protein_coding	CG6272
FBgn0027296	0.506947	4.85801	5.64237	0.0328043	0.915666	chrX	2260206	2262515	-	protein_coding	temp
FBgn0034494	0.505669	5.75409	4.97232	0.0431344	0.915666	chr2R	20271652	20274499	-	protein_coding	CG10444
FBgn0030796	0.504656	5.41536	4.62172	0.0500526	0.915666	chrX	16811698	16826494	+	protein_coding	CG4829
FBgn0035760	0.504566	3.28486	5.16472	0.039819	0.915666	chr3L	7320067	7321211	+	protein_coding	CG8607
FBgn0267029	0.502338	2.9529	6.70392	0.0217962	0.915666	chrX	140972	142197	-	lincRNA	CR45473
FBgn0015765	0.501453	4.67383	10.6409	0.00585608	0.915666	chr3R	24150415	24152321	-	protein_coding	p38a
FBgn0033699	0.501318	10.8494	6.6236	0.0224591	0.915666	chr2R	12199023	12200815	-	protein_coding	RpS11
FBgn0025360	-0.501036	5.347	7.49492	0.0163519	0.915666	chr2R	8031282	8042529	+	protein_coding	Optix
FBgn0261238	-0.501974	7.76737	5.97327	0.0287904	0.915666	chr3R	7094595	7124185	-	protein_coding	Alh
FBgn0265523	-0.503649	7.70497	6.81212	0.0209388	0.915666	chrX	12684202	12742618	-	protein_coding	Smr
FBgn0010575	-0.509945	8.33594	4.97503	0.0430853	0.915666	chr2R	18278197	18357296	-	protein_coding	sbb
FBgn0003300	-0.511288	4.26981	5.75428	0.0313774	0.915666	chrX	20690669	20697321	+	protein_coding	run
FBgn0024189	-0.512952	6.08503	5.32857	0.0372304	0.915666	chr2R	8798488	8856091	+	protein_coding	sns
FBgn0004839	-0.516808	7.67244	4.84576	0.0454928	0.915666	chr2R	12001472	12019846	-	protein_coding	otk
FBgn0043884	-0.516923	8.97879	5.66782	0.0324733	0.915666	chr3R	24230561	24250248	+	protein_coding	mask
FBgn0016031	-0.52441	5.87535	11.184	0.00498246	0.915666	chr3L	5343618	5355923	-	protein_coding	lama
FBgn0035983	-0.525216	6.49746	11.5618	0.00446321	0.915666	chr3L	9386826	9399227	-	protein_coding	CG4080
FBgn0261797	-0.526372	8.33575	5.94781	0.029078	0.915666	chr3L	4807367	4825687	-	protein_coding	Dhc64C
FBgn0010452	-0.526407	7.22712	8.07242	0.0133666	0.915666	chr3L	13114270	13118077	+	protein_coding	trn
FBgn0267001	-0.526702	8.02474	4.92608	0.043979	0.915666	chrX	12043697	12335214	+	protein_coding	Ten-a
FBgn0004885	-0.528731	7.05727	10.3313	0.00643296	0.915666	chr3R	24719696	24749125	+	protein_coding	tok
FBgn0036194	-0.532184	5.84061	10.7803	0.00561606	0.915666	chr3L	11693878	11696963	-	protein_coding	CG11652
FBgn0085430	-0.535325	7.91623	6.50835	0.023452	0.915666	chrX	18863949	18884075	+	protein_coding	CG34401
FBgn0038341	-0.543959	6.40577	5.42984	0.0359495	0.915666	chr3R	15442245	15476193	-	protein_coding	AdamTS-A
FBgn0029082	-0.549547	6.63673	6.42408	0.0242105	0.915666	chr2R	15011395	15042134	+	protein_coding	hbs
FBgn0026319	-0.553426	6.41824	5.65667	0.0328165	0.915666	chr2L	4361924	4380716	+	protein_coding	Traf4
FBgn0033802	-0.555458	4.38887	5.8711	0.029965	0.915666	chr2R	13176093	13190086	-	protein_coding	CG17724
FBgn0035445	-0.558406	4.46081	5.69192	0.0321634	0.915666	chr3L	3378267	3380083	+	protein_coding	CG12014
FBgn0053087	-0.561864	7.69154	5.53832	0.0341997	0.915666	chr2R	8174164	8226438	+	protein_coding	LRP1
FBgn0263392	-0.565507	9.30032	5.4765	0.0350618	0.915666	chr3L	2786206	2879158	-	protein_coding	Tet
FBgn0261648	-0.566992	5.06828	13.1347	0.00287712	0.915666	chr2L	11434310	11445614	-	protein_coding	salm
FBgn0039283	-0.570849	5.70887	11.086	0.0051283	0.915666	chr3R	25138071	25139903	+	protein_coding	danr
FBgn0004108	-0.572087	9.43085	6.22932	0.0260759	0.915666	chr3L	16766071	16777465	+	protein_coding	Nrt
FBgn0003285	-0.574082	6.32064	6.64051	0.0223177	0.915666	chrX	2950398	2973834	-	protein_coding	rst
FBgn0003312	-0.574999	7.97685	8.7312	0.0107032	0.915666	chr3R	11877234	11879754	+	protein_coding	sad
FBgn0085409	-0.581312	7.651	5.01008	0.0430233	0.915666	chr2L	6179132	6211114	+	protein_coding	CG34380
FBgn0010470	-0.581781	7.51343	5.44275	0.0357627	0.915666	chr2R	21487166	21497929	-	protein_coding	Fkbp14
FBgn0261710	-0.582333	9.62219	10.6863	0.00577664	0.915666	chrX	10461864	10474675	-	protein_coding	nocte
FBgn0052581	-0.582727	4.51678	6.21624	0.0262071	0.915666	chrX	15796907	15799162	-	protein_coding	CG32581
FBgn0038321	-0.583891	6.68422	5.20983	0.0398984	0.915666	chr3R	15337907	15343256	-	protein_coding	CG6218
FBgn0052677	-0.587063	6.68504	6.22021	0.02635	0.915666	chrX	10627736	10710947	+	protein_coding	X11Lbeta
FBgn0000210	-0.595146	9.83254	6.27314	0.025642	0.915666	chrX	1575131	1664869	+	protein_coding	br
FBgn0261617	-0.596775	8.06707	7.29049	0.0175899	0.915666	chrX	9665441	9687066	-	protein_coding	nej
FBgn0000411	-0.597945	6.04785	8.126	0.0131233	0.915666	chr3L	14175609	14178620	-	protein_coding	D
FBgn0004861	-0.599081	7.24274	9.07113	0.00957261	0.915666	chrX	2126209	2138371	-	protein_coding	ph-p
FBgn0032350	-0.601168	7.47148	7.77746	0.0148039	0.915666	chr2L	11151505	11155721	-	protein_coding	CG6287
FBgn0030653	-0.60295	6.0246	4.74977	0.0487944	0.915666	chrX	15568992	15570369	+	protein_coding	CG7860
FBgn0052227	-0.605274	6.70578	7.6876	0.015277	0.915666	chr3L	20268858	20295133	-	protein_coding	gogo
FBgn0028481	-0.613732	6.41744	5.15718	0.0412083	0.915666	chr2L	922792	958098	+	protein_coding	CG4341
FBgn0032449	-0.616507	3.92898	6.80306	0.0210091	0.915666	chr2L	12698917	12700746	-	protein_coding	CG17036
FBgn0024836	-0.617527	7.93856	5.37036	0.0372653	0.915666	chr2R	10673344	10721138	+	protein_coding	stan
FBgn0021776	-0.628708	7.541	4.88703	0.0459325	0.915666	chr3R	19931798	19935120	-	protein_coding	mira
FBgn0039286	-0.630797	5.3875	15.0966	0.00172895	0.915666	chr3R	25184382	25192806	+	protein_coding	dan
FBgn0031107	-0.632219	7.2113	10.5009	0.00610923	0.915666	chrX	20394394	20412247	+	protein_coding	HERC2
FBgn0025697	-0.633887	5.44756	6.10744	0.0274634	0.915666	chr2L	7445354	7451244	-	protein_coding	santa-maria
FBgn0031981	-0.634908	5.51544	6.9774	0.0197039	0.915666	chr2L	8043470	8054326	+	protein_coding	CG7466
FBgn0039640	-0.636848	5.70303	6.05422	0.0284365	0.915666	chr3R	29138661	29145787	+	protein_coding	CG14516
FBgn0016756	-0.637326	7.45539	10.8582	0.00548682	0.915666	chr3L	5752972	5761886	+	protein_coding	Ubp64E
FBgn0003002	-0.643924	5.30278	7.02273	0.0193803	0.915666	chr3R	4852812	4869979	+	protein_coding	opa
FBgn0033628	-0.64906	3.11679	8.00759	0.0136681	0.915666	chr2R	11373606	11377109	+	protein_coding	CG13203
FBgn0264005	-0.652602	4.54166	5.89707	0.0296612	0.915666	chr3R	17558929	17569097	+	protein_coding	Hmx
FBgn0000028	-0.65537	3.69631	4.89067	0.0446388	0.915666	chrX	15350238	15379064	-	protein_coding	acj6
FBgn0003366	-0.659595	6.67505	7.02551	0.0198463	0.915666	chrX	11071440	11086299	-	protein_coding	sev
FBgn0000568	-0.660629	8.30015	4.88285	0.0461917	0.915666	chr3L	17950952	18064696	-	protein_coding	Eip75B
FBgn0039736	-0.676635	2.77784	6.6291	0.022413	0.915666	chr3R	30006033	30009189	-	protein_coding	CG7912
FBgn0037623	-0.67855	6.99241	7.2974	0.0178972	0.915666	chr3R	8735878	8747675	-	protein_coding	CG9801
FBgn0052547	-0.67875	2.78721	5.86576	0.030028	0.915666	chrX	18443026	18479487	-	protein_coding	CG32547
FBgn0085369	-0.682056	4.91737	8.47397	0.0116624	0.915666	chr2L	3662744	3692114	+	protein_coding	CG34340
FBgn0011705	-0.683384	5.63073	17.7342	0.000922696	0.881323	chr2L	8985935	8989539	-	protein_coding	rost
FBgn0003090	-0.688605	6.83404	9.83171	0.00750864	0.915666	chr2R	7150702	7223378	+	protein_coding	pk
FBgn0011758	-0.693905	4.09558	5.81977	0.0305762	0.915666	chrX	17397477	17403278	+	protein_coding	B-H1
FBgn0002734	-0.695134	4.43187	4.67878	0.0495599	0.915666	chr3R	25997620	25998633	+	protein_coding	E(spl)mdelta-HLH
FBgn0022710	-0.696687	4.13631	11.2658	0.00486424	0.915666	chrX	15510876	15554278	-	protein_coding	Ac13E
FBgn0011817	-0.697927	7.98971	7.57649	0.0160583	0.915666	chr3L	7979045	8054147	+	protein_coding	nmo
FBgn0264746	-0.707978	2.68444	6.35462	0.0248574	0.915666	chr3L	18072361	18073863	-	protein_coding	CG44004
FBgn0045852	-0.708889	6.40223	8.6235	0.0113541	0.915666	chr2L	18762873	18792906	-	protein_coding	ham
FBgn0005658	-0.710693	6.08296	6.01792	0.0298198	0.915666	chr3L	6097616	6123913	+	protein_coding	Ets65A
FBgn0052182	-0.74027	1.88729	4.69193	0.0485678	0.915666	chr3L	17758111	17759553	+	protein_coding	CG32182
FBgn0036846	-0.744312	6.22224	12.9153	0.00305347	0.915666	chr3L	19092669	19094760	+	protein_coding	MESR6
FBgn0038880	-0.745368	2.04628	4.96898	0.0431947	0.915666	chr3R	21276663	21293998	-	protein_coding	SIFaR
FBgn0033638	-0.747674	6.5247	10.7131	0.00574474	0.915666	chr2R	11619478	11640941	-	protein_coding	CG9005
FBgn0005677	-0.749412	7.58199	6.76317	0.0222935	0.915666	chr2L	16466511	16485998	-	protein_coding	dac
FBgn0001089	-0.767225	4.56802	5.27665	0.0391124	0.915666	chr2L	6003573	6006827	-	protein_coding	Gal
FBgn0030600	-0.768576	7.04086	8.20279	0.0133254	0.915666	chrX	15010136	15063429	-	protein_coding	hiw
FBgn0026190	-0.781653	2.17397	4.93915	0.0437382	0.915666	chr3R	30491812	30496153	-	protein_coding	PH4alphaMP
FBgn0001229	-0.783565	6.80084	5.76153	0.0335939	0.915666	chr3L	9371510	9372497	-	protein_coding	Hsp67Bc
FBgn0034045	-0.798234	2.3333	7.10761	0.0187906	0.915666	chr2R	15842759	15847362	-	protein_coding	CG8249
FBgn0000591	-0.800319	4.81528	11.8033	0.004164	0.915666	chr3R	26040239	26041008	+	protein_coding	E(spl)m8-HLH
FBgn0004959	-0.803643	8.161	9.69657	0.00799034	0.915666	chrX	18685765	18688433	+	protein_coding	phm
FBgn0263492	-0.807073	1.71555	4.92138	0.0440658	0.915666	chr3L	9378159	9381119	+	lincRNA	CR43481
FBgn0052512	-0.822746	5.30182	23.7001	0.000268706	0.483847	chrX	21062276	21067540	-	protein_coding	CG32512
FBgn0051697	-0.837296	0.228234	5.07988	0.0412425	0.915666	chr2L	19535447	19536104	+	protein_coding	CG31697
FBgn0003720	-0.84121	4.77155	5.28268	0.039932	0.915666	chr3R	30852314	30854400	+	protein_coding	tll
FBgn0016054	-0.860273	2.96819	11.2699	0.00485845	0.915666	chr2L	20643350	20645791	-	protein_coding	phr6-4
FBgn0029719	-0.866618	1.1319	5.10091	0.0408842	0.915666	chrX	4651954	4654497	-	protein_coding	CG15473
FBgn0033438	-0.867609	7.99199	19.2339	0.000661876	0.774791	chr2R	9611138	9683858	-	protein_coding	Mmp2
FBgn0003295	-0.880121	4.81703	4.8014	0.0492765	0.915666	chr3L	1370627	1387437	+	protein_coding	ru
FBgn0266262	-0.880288	0.495154	5.32118	0.0373428	0.915666	chrX	4311988	4314769	-	lincRNA	CR44957
FBgn0039073	-0.883889	6.29625	11.7135	0.00457296	0.915666	chr3R	23361888	23363574	-	protein_coding	CG4408
FBgn0040385	-0.886837	1.04118	5.31264	0.0374732	0.915666	chrX	2409364	2410901	-	protein_coding	CG12496
FBgn0027571	-0.887263	8.12945	21.4384	0.000417778	0.611314	chr2L	3056597	3068177	+	protein_coding	CG3523
FBgn0035861	-0.89049	0.897508	5.51402	0.0345356	0.915666	chr3L	8231813	8240601	-	protein_coding	CG7213
FBgn0259986	-0.894119	5.58885	14.2519	0.00214242	0.915666	chr3L	4153617	4160932	-	protein_coding	nab
FBgn0259162	-0.898889	2.34778	6.06004	0.0278351	0.915666	chrX	20538496	20567097	+	protein_coding	RunxB
FBgn0031791	-0.900185	3.8693	8.36476	0.0120996	0.915666	chr2L	6255858	6256822	+	protein_coding	AANATL2
FBgn0005612	-0.900655	6.35496	11.4966	0.00491831	0.915666	chr2R	23978800	23985177	+	protein_coding	Sox14
FBgn0039129	-0.904019	0.766332	4.73276	0.0477283	0.915666	chr3R	23932728	23933530	-	protein_coding	RpS19b
FBgn0000320	-0.914247	6.5215	6.87828	0.0227976	0.915666	chr2L	6527446	6546976	-	protein_coding	eya
FBgn0032519	-0.915682	1.38178	5.35084	0.0368941	0.915666	chr2L	13395359	13396184	-	protein_coding	CG16957
FBgn0035643	-0.927266	3.93451	9.81311	0.00755252	0.915666	chr3L	5882303	5884090	+	protein_coding	CG13287
FBgn0001226	-0.930444	10.6434	24.4465	0.000233723	0.483847	chr3L	9384062	9385694	+	protein_coding	Hsp27
FBgn0261612	-0.931427	3.90231	5.57783	0.0346087	0.915666	chr2R	16243144	16259805	-	protein_coding	CngA
FBgn0266167	-0.94338	0.796586	5.91301	0.0294765	0.915666	chr2L	10004309	10005043	-	lincRNA	CR44873
FBgn0031375	-0.968234	5.55369	6.1707	0.029501	0.915666	chr2L	1950238	1970362	-	protein_coding	erm
FBgn0041180	-0.970547	7.92251	4.8467	0.0498451	0.915666	chr2L	19548506	19556451	+	protein_coding	Tep4
FBgn0000449	-1.01244	3.45717	10.0935	0.00692114	0.915666	chr3L	4062291	4064551	+	protein_coding	dib
FBgn0002735	-1.01417	5.28312	12.5624	0.00355677	0.915666	chr3R	25999850	26000761	+	protein_coding	E(spl)mgamma-HLH
FBgn0036620	-1.03432	0.618159	6.31331	0.0252516	0.915666	chr3L	16368388	16369518	+	protein_coding	CG4842
FBgn0038071	-1.04501	7.72781	34.9939	4.21e-05	0.105698	chr3R	12648057	12652910	+	protein_coding	Dtg
FBgn0036677	-1.04505	3.9936	13.2013	0.00282587	0.915666	chr3L	16923913	16927434	-	protein_coding	CG13023
FBgn0265691	-1.05776	0.448848	6.25913	0.0257798	0.915666	chrX	6001510	6005713	+	lincRNA	CR44498
FBgn0063127	-1.0883	8.80759	17.7067	0.00095365	0.881323	chr3R	6699559	6700164	-	lincRNA	pncr002:3R
FBgn0001263	-1.14059	1.08443	8.05567	0.0134438	0.915666	chr2R	22855687	22858794	-	protein_coding	inaD
FBgn0085479	-1.16449	-0.700338	5.86678	0.0300158	0.915666	chrX	9329015	9330487	-	protein_coding	CG34450
FBgn0265985	-1.16878	-0.394357	4.82732	0.045849	0.915666	chr2R	22690494	22691895	+	lincRNA	CR44764
FBgn0034030	-1.18931	0.638364	5.1232	0.0405084	0.915666	chr2R	15544315	15549984	-	protein_coding	CG8192
FBgn0264878	-1.26728	0.176774	9.002	0.00979086	0.915666	chr2R	9610463	9615617	+	lincRNA	CR44069
FBgn0029924	-1.28037	4.85798	23.5671	0.000275555	0.483847	chrX	6969917	6972265	+	protein_coding	CG4586
FBgn0024294	-1.28582	7.22236	7.17239	0.0218974	0.915666	chr2R	7147691	7149289	+	protein_coding	Spn43Aa
FBgn0266139	-1.29813	-0.844955	5.56783	0.033797	0.915666	chr2L	10208740	10209786	+	lincRNA	CR44845
FBgn0031741	-1.32998	2.22708	13.7276	0.00245629	0.915666	chr2L	5805394	5809063	+	protein_coding	CG11034
FBgn0053126	-1.34741	6.12614	6.85869	0.0249234	0.915666	chr2L	1359836	1361821	-	protein_coding	NLaz
FBgn0260474	-1.35069	1.06287	4.8171	0.046048	0.915666	chr2R	9704383	9706147	+	protein_coding	CG30002
FBgn0039480	-1.37073	2.68262	5.8103	0.0315463	0.915666	chr3R	27083129	27087778	-	protein_coding	Cpr97Ea
FBgn0266199	-1.41185	-0.591403	4.73296	0.0477242	0.915666	chrX	10114339	10208574	-	lincRNA	CR44894
FBgn0035577	-1.43372	0.779973	11.6692	0.00432722	0.915666	chr3L	4829091	4833591	-	protein_coding	CG13708
FBgn0010433	-1.46467	3.90356	15.2796	0.00174419	0.915666	chr3R	8278051	8279274	+	protein_coding	ato
FBgn0001253	-1.46472	8.69808	8.60319	0.013946	0.915666	chr3L	8372404	8391171	+	protein_coding	ImpE1
FBgn0043578	-1.46958	0.336683	5.64983	0.0327069	0.915666	chr3L	16727298	16727989	-	protein_coding	PGRP-SB1
FBgn0263236	-1.48736	6.68112	13.4056	0.00366532	0.915666	chr3R	29244960	29250451	-	protein_coding	SP1029
FBgn0024943	-1.52713	-0.366224	8.199	0.0128	0.915666	chrX	8525386	8529698	-	protein_coding	PIP82
FBgn0004865	-1.52762	5.16975	17.6129	0.00120539	0.915666	chr3L	21226608	21266503	+	protein_coding	Eip78C
FBgn0030587	-1.54984	0.322072	6.51058	0.0234323	0.915666	chrX	14846471	14848808	-	protein_coding	CG9522
FBgn0027348	-1.56686	2.16083	4.71698	0.0498961	0.915666	chr2L	14013003	14019328	+	protein_coding	bgm
FBgn0263493	-1.57032	1.06854	6.63936	0.0223272	0.915666	chr3L	9386111	9386463	+	pseudogene	CR43482
FBgn0032749	-1.57862	-0.37138	6.39752	0.0244555	0.915666	chr2L	19059128	19063132	+	protein_coding	Phlpp
FBgn0029863	-1.58019	4.33815	6.18954	0.0308426	0.915666	chrX	6303974	6306745	+	protein_coding	CG3823
FBgn0039479	-1.59816	2.47474	7.48442	0.0169112	0.915666	chr3R	27075869	27082818	+	protein_coding	CG14257
FBgn0031970	-1.62627	-0.340945	6.43408	0.024119	0.915666	chr2L	7994387	7998151	-	protein_coding	CG7227
FBgn0034413	-1.63123	0.431809	5.11851	0.0405871	0.915666	chr2R	19035491	19036387	-	protein_coding	CG15115
FBgn0267666	-1.63439	1.63958	14.3554	0.00208609	0.915666	chr3L	10306677	10320600	+	lincRNA	CR46004
FBgn0031730	-1.69069	-1.03243	5.92942	0.0292878	0.915666	chr2L	5706373	5713791	+	protein_coding	CG7236
FBgn0033149	-1.77288	-0.793555	4.67165	0.0489913	0.915666	chr2R	7175885	7178290	+	protein_coding	CG11060
FBgn0035138	-1.81628	-1.54356	5.25117	0.0384278	0.915666	chr3L	365663	366437	-	protein_coding	CG13884
FBgn0034253	-1.86568	5.46226	15.7273	0.0022108	0.915666	chr2R	17604950	17639138	-	protein_coding	CG10936
FBgn0034785	-1.86661	2.64873	4.92159	0.0478704	0.915666	chr2R	22845976	22847911	+	protein_coding	CG3649
FBgn0267221	-1.87588	-1.88584	4.8631	0.0451609	0.915666	chr3L	22909317	22909687	+	lincRNA	CR45661
FBgn0029521	-1.88077	-1.30689	4.98184	0.0429629	0.915666	chrX	315122	316566	+	protein_coding	Or1a
FBgn0001255	-1.89627	5.93609	8.09862	0.0174123	0.915666	chr3R	8028452	8029546	-	protein_coding	ImpE3
FBgn0039686	-1.93724	2.28122	5.97045	0.0308285	0.915666	chr3R	29718662	29722388	+	protein_coding	CG15506
FBgn0004783	-1.96918	0.651974	10.5643	0.00599305	0.915666	chr3R	6704083	6704903	+	protein_coding	Ccp84Aa
FBgn0000079	-1.97103	0.015427	5.74102	0.0315427	0.915666	chr2R	17118635	17120303	-	protein_coding	Amy-p
FBgn0032551	-1.99723	-0.714079	4.86431	0.0451378	0.915666	chr2L	14783300	14784598	-	protein_coding	CG18636
FBgn0037059	-2.01429	-1.17818	4.64091	0.0496415	0.915666	chr3L	21208147	21210084	-	protein_coding	CG10510
FBgn0051054	-2.02681	0.633799	10.4397	0.00622392	0.915666	chr3R	27960767	27961476	+	pseudogene	CR31054
FBgn0035638	-2.04601	-1.40783	11.2745	0.00485187	0.915666	chr3L	5794404	5796543	-	protein_coding	Tektin-C
FBgn0036727	-2.08791	1.34551	11.196	0.00496491	0.915666	chr3L	17470126	17474517	+	protein_coding	CG7589
FBgn0264747	-2.17308	-1.6747	8.25392	0.0125628	0.915666	chr3L	18070299	18072123	-	protein_coding	CG44005
FBgn0267625	-2.18024	-1.75618	6.45549	0.0239245	0.915666	chr3L	22345382	22346236	+	lincRNA	CR45963
FBgn0037412	-2.18372	-0.159683	5.46868	0.0351726	0.915666	chr3R	6218317	6221781	-	protein_coding	Osi4
FBgn0052040	-2.18566	-1.32948	5.52869	0.0343324	0.915666	chr3L	9354032	9355457	+	protein_coding	CG32040
FBgn0086061	-2.19108	-1.17502	7.87835	0.014293	0.915666	chr3R	29862625	29862717	+	snoRNA	snoRNA:Or-CD8
FBgn0265961	-2.23036	-0.979426	4.80372	0.0463099	0.915666	chr2R	21663159	21663925	+	lincRNA	CR44748
FBgn0266649	-2.25011	-1.1294	6.97572	0.0197161	0.915666	chr3L	4345800	4347801	+	lincRNA	CR45156
FBgn0033774	-2.26292	-1.61576	6.19179	0.0264545	0.915666	chr2R	12762112	12763825	+	protein_coding	CG12374
FBgn0266708	-2.2801	-1.79386	5.23142	0.0387405	0.915666	chr2R	15687387	15688985	-	protein_coding	Cep89
FBgn0062517	-2.28476	-1.84757	7.68678	0.0152814	0.915666	chr3L	2595780	2596998	+	protein_coding	CG16984
FBgn0265098	-2.31002	-1.72019	4.68743	0.0486615	0.915666	chr2R	7429495	7429995	-	lincRNA	CR44203
FBgn0033490	-2.32737	-1.4244	5.89191	0.0297212	0.915666	chr2R	10137655	10139267	+	protein_coding	CG12917
FBgn0265868	-2.33716	-1.01051	4.87146	0.0450019	0.915666	chrX	14114140	14116889	+	lincRNA	CR44657
FBgn0265017	-2.35005	-0.339877	10.3398	0.00641627	0.915666	chr2L	2181961	2185495	+	lincRNA	CR43751
FBgn0267470	-2.36726	0.313016	15.2988	0.00164412	0.915666	chr3L	3555630	3556299	-	lincRNA	CR45820
FBgn0038414	-2.37029	-1.62038	10.0338	0.00705028	0.915666	chr3R	16323414	16325128	+	protein_coding	CG6901
FBgn0039527	-2.37572	4.20987	6.80594	0.0261174	0.915666	chr3R	27586473	27596130	-	protein_coding	CG5639
FBgn0001254	-2.38456	9.72924	8.73407	0.0147565	0.915666	chr3L	3510973	3512681	-	protein_coding	ImpE2
FBgn0050083	-2.40757	-1.1215	5.35638	0.036811	0.915666	chr2R	15711596	15712644	-	protein_coding	CG30083
FBgn0004782	-2.45273	0.207782	15.0434	0.0017521	0.915666	chr3R	6701967	6702877	-	protein_coding	Ccp84Ab
FBgn0267247	-2.46411	-2.51542	4.8715	0.0450012	0.915666	chr3L	1807545	1807855	+	lincRNA	CR45687
FBgn0003382	-2.46471	-0.206451	10.5987	0.00593116	0.915666	chr2R	11324313	11336463	+	protein_coding	sha
FBgn0053286	-2.51042	-1.94977	7.61095	0.0156944	0.915666	chr3L	20970811	20974700	-	protein_coding	CG33286
FBgn0266047	-2.52211	-2.1573	4.99069	0.0428041	0.915666	chr2R	24350968	24351389	-	protein_coding	CG44812
FBgn0037014	-2.5637	-1.38478	6.02224	0.0282467	0.915666	chr3L	20637198	20640910	+	protein_coding	CG13251
FBgn0011278	-2.58881	-1.08231	6.86261	0.0205523	0.915666	chr3R	21441576	21446537	-	protein_coding	lbe
FBgn0032891	-2.59453	-0.189961	9.37579	0.00867552	0.915666	chr2L	20832848	20835840	-	protein_coding	Oseg5
FBgn0000473	-2.5959	0.0607435	10.2343	0.00662724	0.915666	chr2R	6779748	6781491	-	protein_coding	Cyp6a2
FBgn0000078	-2.60514	-0.239282	6.00404	0.029047	0.915666	chr2R	17124763	17126369	+	protein_coding	Amy-d
FBgn0035625	-2.61688	5.35863	8.29454	0.0169482	0.915666	chr3L	5630982	5652094	+	protein_coding	Blimp-1
FBgn0039202	-2.61797	-2.02908	6.06036	0.0278316	0.915666	chr3R	24522477	24523678	-	protein_coding	CG13622
FBgn0030200	-2.64853	-2.8348	4.76925	0.0469926	0.915666	chrX	10417428	10418219	+	protein_coding	RabX2
FBgn0039795	-2.65241	6.03028	6.84023	0.0269781	0.915666	chr3R	30690641	30692768	+	protein_coding	Spn100A
FBgn0264562	-2.6703	6.15096	16.1371	0.00246012	0.915666	chrX	1941939	2007956	+	protein_coding	Hr4
FBgn0053287	-2.72716	-2.80497	5.27505	0.0380536	0.915666	chr3L	20966765	20970663	-	protein_coding	CG33287
FBgn0031462	-2.7278	-2.25278	5.79116	0.0309233	0.915666	chr2L	2812436	2814429	+	protein_coding	CG2964
FBgn0264879	-2.73112	-0.797502	14.5533	0.00198302	0.915666	chr2R	9636995	9637673	-	lincRNA	CR44070
FBgn0266211	-2.73538	1.51791	35.0524	4.18e-05	0.105698	chr2L	19740838	19742506	-	pseudogene	CR44906
FBgn0038642	-2.75227	-1.08701	4.90154	0.0444351	0.915666	chr3R	18687555	18692719	-	protein_coding	Muc91C
FBgn0259795	-2.80732	-1.73089	4.63268	0.0498174	0.915666	chr2R	16534942	16537086	+	protein_coding	loopin-1
FBgn0052733	-2.81059	-2.69707	5.2826	0.0379362	0.915666	chrX	6952335	6952809	+	pseudogene	CR32733
FBgn0037283	-2.83571	-2.45361	7.46639	0.0165184	0.915666	chr3R	4829910	4830513	-	protein_coding	CG14658
FBgn0036618	-2.92967	-1.18404	11.5442	0.00448595	0.915666	chr3L	16364898	16365707	+	protein_coding	Cpr72Eb
FBgn0053306	-2.93925	-1.87892	9.27262	0.00896794	0.915666	chr2L	13842887	13843742	-	protein_coding	CG33306
FBgn0030589	-2.98552	-2.03349	5.60032	0.0333601	0.915666	chrX	14854327	14856361	-	protein_coding	CG9519
FBgn0265511	-3.00726	-2.45164	5.90299	0.0295924	0.915666	chr2R	15915994	15916795	+	lincRNA	CR44373
FBgn0267203	-3.0107	-2.14258	10.4179	0.00626523	0.915666	chr3R	16223394	16223854	+	lincRNA	CR45643
FBgn0267783	-3.01453	-2.27231	7.58855	0.015819	0.915666	chr3R	30357254	30358138	-	lincRNA	CR46114
FBgn0029656	-3.03328	-1.95065	7.66493	0.0153991	0.915666	chrX	3314743	3316402	-	protein_coding	CG10793
FBgn0000448	-3.03837	4.20416	8.67914	0.0148906	0.915666	chr2R	10203994	10237348	-	protein_coding	Hr46
FBgn0035751	-3.0472	-2.40438	6.33498	0.0293094	0.915666	chr3L	7236799	7238122	-	protein_coding	CG14829
FBgn0265531	-3.04761	-2.31728	6.02638	0.0282012	0.915666	chrX	2065454	2066106	+	lincRNA	CR44381
FBgn0267603	-3.05418	-3.09466	5.35912	0.0417198	0.915666	chr3L	19183997	19184726	-	lincRNA	CR45941
FBgn0019929	-3.16151	-2.56123	6.66642	0.0221028	0.915666	chrX	9865232	9867070	+	protein_coding	Ser7
FBgn0042086	-3.16184	-0.145757	5.978	0.0304965	0.915666	chr2R	6998847	6999848	+	protein_coding	Tsp42Eb
FBgn0034454	-3.16861	-0.890667	6.44921	0.0241232	0.915666	chr2R	19497751	19500372	+	protein_coding	CG15120
FBgn0041581	-3.19266	2.84782	9.96889	0.0094104	0.915666	chr2R	14749222	14750165	+	protein_coding	AttB
FBgn0266706	-3.20173	-2.21613	6.19398	0.0264322	0.915666	chr3R	9228132	9230277	+	lincRNA	CR45196
FBgn0267742	-3.218	-2.30136	5.88676	0.0297814	0.915666	chr3R	26847808	26849236	+	lincRNA	CR46073
FBgn0039053	-3.22122	-2.38829	7.98094	0.0137943	0.915666	chr3R	23099532	23100983	+	protein_coding	CG6738
FBgn0264500	-3.22502	-1.36864	12.2147	0.00370609	0.915666	chrX	10210180	10210636	+	lincRNA	CR43899
FBgn0266751	-3.25812	-2.03122	6.00575	0.0284284	0.915666	chr3R	22194978	22209477	-	lincRNA	CR45224
FBgn0266209	-3.29409	-1.83536	14.2464	0.0021455	0.915666	chr2L	18795823	18796180	-	lincRNA	CR44904
FBgn0041234	-3.30174	-2.48419	7.65565	0.0154495	0.915666	chr2R	23542509	23543885	+	protein_coding	Gr59f
FBgn0024319	-3.30894	-3.10226	5.05615	0.0468174	0.915666	chr2R	16653204	16655046	-	protein_coding	Nach
FBgn0266592	-3.32384	-3.1007	6.17211	0.0310324	0.915666	chr3L	527670	528129	+	lincRNA	CR45117
FBgn0029795	-3.36747	-0.383942	7.56873	0.0166663	0.915666	chrX	5732739	5734614	+	protein_coding	CG15773
FBgn0264720	-3.37181	-2.57714	5.81051	0.0353171	0.915666	chr3L	72195	73101	-	lincRNA	CR43988
FBgn0267460	-3.40209	-2.95731	5.32734	0.0422217	0.915666	chr3L	962755	963099	+	lincRNA	CR45810
FBgn0265268	-3.49198	-2.5334	7.74833	0.0149554	0.915666	chr3L	18603424	18605415	+	protein_coding	CG18234
FBgn0031201	-3.50179	-2.42679	8.19967	0.012797	0.915666	chrX	22809291	22811935	-	protein_coding	CG12446
FBgn0043575	-3.5254	1.28201	13.9872	0.00265811	0.915666	chr2R	8716949	8717695	+	protein_coding	PGRP-SC2
FBgn0037284	-3.55506	-2.92315	6.31763	0.0294874	0.915666	chr3R	4830848	4831297	-	protein_coding	CG14659
FBgn0264540	-3.56281	-3.05327	5.44637	0.0403787	0.915666	chr2R	14553764	14554309	-	protein_coding	CG43919
FBgn0264568	-3.56306	-2.65115	5.05682	0.0468055	0.915666	chr3L	21594596	21595460	+	lincRNA	CR43940
FBgn0061196	-3.59863	-2.67382	7.27242	0.0213641	0.915666	chrX	4959928	4961128	-	protein_coding	SIP3
FBgn0050286	-3.60928	-1.5131	12.3605	0.00355801	0.915666	chr2R	21535715	21536795	-	protein_coding	CG30286
FBgn0265065	-3.64054	-2.67589	5.50571	0.0394966	0.915666	chr3R	14421750	14422549	-	lincRNA	CR44176
FBgn0039373	-3.6495	-2.91222	5.67375	0.0371223	0.915666	chr3R	25811095	25811775	+	protein_coding	CG5024
FBgn0032068	-3.65572	-3.04383	5.24589	0.043542	0.915666	chr2L	8772945	8776263	-	protein_coding	CG9466
FBgn0261924	-3.6714	-2.44457	6.75352	0.0213982	0.915666	chr2L	15863199	15863663	+	lincRNA	CR42791
FBgn0265541	-3.73294	-3.01344	5.94642	0.0336274	0.915666	chr2R	17135594	17136325	+	pseudogene	CR44391
FBgn0033950	-3.75859	-3.01199	5.94622	0.0336298	0.915666	chr2R	14640213	14640626	-	protein_coding	CG12862
FBgn0051601	-3.76054	-3.05854	5.8481	0.043428	0.915666	chr2L	22040726	22043877	-	protein_coding	CG31601
FBgn0260428	-3.76089	-2.7536	4.92697	0.0492201	0.915666	chr2L	4762894	4763951	+	protein_coding	CG42523
FBgn0063298	-3.79097	-2.96073	6.27722	0.0299069	0.915666	chr3R	9022056	9024018	+	lincRNA	CR31429
FBgn0261058	-3.79358	-2.962	5.24133	0.0436173	0.915666	chr2L	20640916	20642216	+	protein_coding	Sfp38D
FBgn0267150	-3.80176	-2.35639	5.82374	0.0351481	0.915666	chr3R	13785805	13786583	-	lincRNA	CR45590
FBgn0031373	-3.80294	-2.86922	5.14114	0.0453144	0.915666	chr2L	1882007	1883185	-	protein_coding	CG15358
FBgn0264827	-3.80872	-3.00343	5.82588	0.0351209	0.915666	chr3R	9810019	9813929	-	lincRNA	CR44035
FBgn0034477	-3.81258	-2.82815	6.18377	0.0309051	0.915666	chr2R	19878835	19880920	-	protein_coding	CG13872
FBgn0037421	-3.8207	-2.95477	5.25863	0.043332	0.915666	chr3R	6287732	6289824	+	protein_coding	CG15594
FBgn0026141	-3.82758	-2.87126	5.21147	0.0441148	0.915666	chr2L	1344399	1345135	+	protein_coding	Cdlc2
FBgn0033056	-3.85192	-2.9528	5.59921	0.0381536	0.915666	chr2R	6057356	6059558	-	protein_coding	CG7856
FBgn0083022	-3.85871	-2.79521	5.07706	0.0464421	0.915666	chr2L	20421150	20421274	+	snoRNA	snoRNA:Psi18S-640e
FBgn0086059	-3.86124	-2.73731	4.86585	0.0504094	0.915666	chr3R	24723825	24723920	+	snoRNA	snoRNA:Me18S-C1280
FBgn0034121	-3.88666	-2.99862	4.96959	0.0484113	0.915666	chr2R	16359729	16363524	+	protein_coding	CG6262
FBgn0259951	-3.92992	-2.9684	6.65935	0.02621	0.915666	chr2L	3667976	3668551	-	protein_coding	Sfp24Ba
FBgn0267294	-3.94818	-2.60569	5.84693	0.0348543	0.915666	chr2L	5297485	5297928	-	lincRNA	CR45730
FBgn0086077	-3.95296	-2.92113	5.29744	0.0427005	0.915666	chr3L	11001408	11001489	-	snoRNA	snoRNA:Me18S-G962
FBgn0050199	-3.96153	-2.92869	5.72001	0.0364994	0.915666	chr2R	25076764	25076836	+	tRNA	tRNA:CR30199
FBgn0029645	-3.96415	-2.8786	6.03396	0.0325908	0.915666	chrX	2943385	2944569	+	protein_coding	CG14422
FBgn0262227	-3.96419	-3.01064	5.8614	0.0432462	0.915666	chr2R	20585199	20585295	-	pre_miRNA	mir-991
FBgn0038873	-3.97693	-2.46093	5.62018	0.03786	0.915666	chr3R	21242617	21245418	+	protein_coding	CG5892
FBgn0038730	-3.99381	-2.87962	6.42433	0.0284134	0.915666	chr3R	19771381	19773225	-	protein_coding	CG6300
FBgn0052570	-4.01817	-2.31021	7.50291	0.0198265	0.915666	chrX	16734946	16735980	+	protein_coding	TwdlY
FBgn0264266	-4.02319	-2.9552	6.27891	0.0298892	0.915666	chr2L	9848288	9848794	+	lincRNA	CR43766
FBgn0051815	-4.02581	-2.53054	5.52809	0.0391699	0.915666	chr2L	16605821	16607321	+	protein_coding	CG31815
FBgn0267787	-4.04813	-2.7015	4.99519	0.0479331	0.915666	chr3R	31345138	31345746	+	lincRNA	CR46118
FBgn0035042	-4.06058	-2.97734	6.25479	0.0382822	0.915666	chr2R	24639687	24640756	+	protein_coding	CG3640
FBgn0032965	-4.095	-2.97203	9.07185	0.0177331	0.915666	chr2L	21896665	21898289	-	protein_coding	CG11629
FBgn0037589	-4.10799	-2.84339	10.9123	0.0073613	0.915666	chr3R	8419821	8420597	-	protein_coding	Obp85a
FBgn0052117	-4.12893	-2.79121	5.94562	0.033637	0.915666	chr3L	12902924	12903711	-	protein_coding	CG32117
FBgn0033215	-4.13216	-1.74004	8.86875	0.010228	0.915666	chr2R	7712577	7714182	+	protein_coding	CG1942
FBgn0030429	-4.13459	-2.60283	5.34994	0.041864	0.915666	chrX	12855687	12857722	-	protein_coding	CG4661
FBgn0052405	-4.17124	-1.70034	12.6693	0.00326622	0.915666	chr3L	6139222	6139974	-	protein_coding	Cpr65Av
FBgn0032471	-4.18229	-2.89698	5.2303	0.0438002	0.915666	chr2L	13130590	13134804	+	protein_coding	CG5122
FBgn0053533	-4.18248	-0.770236	5.54426	0.0367047	0.915666	chr2L	19419074	19419767	+	protein_coding	lectin-37Db
FBgn0259794	-4.19166	-2.62652	5.11634	0.0457469	0.915666	chr3L	16859079	16860529	+	protein_coding	sinah
FBgn0050447	-4.19442	-2.8111	6.56812	0.0270399	0.915666	chr2R	19947195	19948080	+	protein_coding	CG30447
FBgn0265954	-4.1999	-2.89386	6.79542	0.0250285	0.915666	chr2L	18954583	18954970	+	lincRNA	CR44741
FBgn0038218	-4.21595	-2.93445	6.62786	0.0342304	0.915666	chr3R	14261390	14262418	-	protein_coding	CG14841
FBgn0266892	-4.26149	-2.92675	8.82352	0.0188607	0.915666	chr2L	14021582	14022033	-	lincRNA	CR45352
FBgn0051952	-4.27262	-2.61161	6.64247	0.0263612	0.915666	chr2L	3416692	3418068	+	protein_coding	CG31952
FBgn0033680	-4.28123	-2.80381	8.31057	0.0153931	0.915666	chr2R	12081275	12082057	+	protein_coding	CG13186
FBgn0034295	-4.28369	-1.96097	6.04907	0.0279538	0.915666	chr2R	18052549	18054066	-	protein_coding	CG10911
FBgn0262680	-4.28631	-2.5377	9.01388	0.0124732	0.915666	chr3L	70850	71396	+	lincRNA	CR43150
FBgn0032636	-4.30801	-2.91951	9.00346	0.0180349	0.915666	chr2L	17433861	17435800	+	protein_coding	CG5043
FBgn0265303	-4.31994	-2.73164	5.26706	0.0431939	0.915666	chr2R	8241595	8242017	-	lincRNA	CR44276
FBgn0267633	-4.4057	-2.19666	8.90449	0.0128806	0.915666	chr3L	22176422	22177599	-	lincRNA	CR45971
FBgn0267274	-4.4059	-2.68728	6.59293	0.0268111	0.915666	chrX	18676167	18676761	-	lincRNA	CR45710
FBgn0030108	-4.41894	-2.75857	8.15179	0.016162	0.915666	chrX	9227136	9228827	+	protein_coding	Gr8a
FBgn0033572	-4.43477	-2.75623	9.37103	0.0112466	0.915666	chr2R	10903569	10905563	+	protein_coding	polyph
FBgn0030395	-4.43845	-2.83689	8.01855	0.016843	0.915666	chrX	12494394	12496597	-	protein_coding	Mks1
FBgn0086200	-4.44473	-2.59588	4.9773	0.0482666	0.915666	chr2L	18665131	18667548	+	pseudogene	CR42490
FBgn0030191	-4.4475	-2.7607	7.69863	0.0186245	0.915666	chrX	10330159	10331818	-	protein_coding	CG15306
FBgn0267541	-4.47434	-2.81304	6.09994	0.031835	0.915666	chr3L	11666318	11667079	+	lincRNA	CR45881
FBgn0003996	-4.47753	3.46155	48.0113	1.63e-05	0.0716773	chrX	2790598	2796466	-	protein_coding	w
FBgn0034740	-4.48368	-2.49671	8.22444	0.0158046	0.915666	chr2R	22650555	22653595	+	protein_coding	nsr
FBgn0031132	-4.4855	-2.85173	5.41719	0.0498924	0.915666	chrX	20822145	20825641	+	protein_coding	CG15450
FBgn0037402	-4.52438	-2.65603	9.1665	0.0119303	0.915666	chr3R	6122591	6124405	+	protein_coding	Vha14-2
FBgn0265530	-4.57106	-2.34093	6.37394	0.0289147	0.915666	chr2R	16814394	16815495	-	lincRNA	CR44380
FBgn0031108	-4.60681	-2.63529	9.62807	0.0104528	0.915666	chrX	20412340	20413581	-	protein_coding	CG15459
FBgn0032387	-4.61043	-2.75395	4.94968	0.0487871	0.915666	chr2L	11981590	11984380	+	protein_coding	CG16965
FBgn0266097	-4.64689	-2.76436	7.31841	0.0210461	0.915666	chrX	5188170	5188797	-	lincRNA	CR44834
FBgn0034506	-4.6592	-2.47528	8.629	0.0139794	0.915666	chr2R	20343844	20346018	+	protein_coding	CG13870
FBgn0266742	-4.66442	-2.53119	8.74858	0.0134891	0.915666	chr3R	8316983	8318006	+	lincRNA	CR45215
FBgn0262334	-4.67518	-2.79883	10.2882	0.0132976	0.915666	chr2R	20585313	20585405	-	pre_miRNA	mir-992
FBgn0031999	-4.67991	-1.65314	20.1651	0.000542845	0.733217	chr2L	8206170	8209637	+	protein_coding	CG8419
FBgn0265041	-4.70856	-2.47775	12.0693	0.00547305	0.915666	chr3R	18208778	18209282	+	protein_coding	CG44158
FBgn0031728	-4.73903	-2.74575	6.01713	0.032787	0.915666	chr2L	5662848	5670838	+	protein_coding	Hsp60C
FBgn0033327	-4.75558	-2.70581	5.70543	0.0366944	0.915666	chr2R	8713445	8715094	+	protein_coding	PGRP-SC1b
FBgn0267085	-4.76564	-2.72816	11.5882	0.00617804	0.915666	chrX	5810491	5811006	+	lincRNA	CR45529
FBgn0050043	-4.76731	-2.26756	6.90643	0.024112	0.915666	chr2R	12359435	12363165	+	protein_coding	CG30043
FBgn0267674	-4.7999	-2.53492	8.42761	0.0148543	0.915666	chr3R	11356105	11356601	-	lincRNA	CR46010
FBgn0266650	-4.83017	-2.08792	9.66251	0.0103516	0.915666	chr3L	13032395	13033070	-	lincRNA	CR45157
FBgn0036704	-4.8433	-2.52838	11.1163	0.00697765	0.915666	chr3L	17252376	17253937	-	protein_coding	CG6497
FBgn0034552	-4.85279	-2.28604	15.8465	0.00230788	0.915666	chr2R	20847979	20849939	-	protein_coding	CG17999
FBgn0266822	-4.85915	-1.78426	19.4136	0.000636729	0.774791	chr2L	14032005	14038306	-	lincRNA	CR45284
FBgn0261813	-4.86528	-2.36046	9.70048	0.0102414	0.915666	chr3L	11382807	11384258	-	lincRNA	CR42755
FBgn0044811	-4.88004	-2.53619	10.16	0.009013	0.915666	chr2L	19911814	19912377	-	protein_coding	TotF
FBgn0035620	-4.88705	-2.52415	12.9612	0.00440404	0.915666	chr3L	5595541	5597422	+	protein_coding	CG5150
FBgn0085312	-4.89516	-2.58331	8.40943	0.0149365	0.915666	chr3R	18721966	18722590	-	protein_coding	CG34283
FBgn0000278	-4.92077	0.851391	6.08311	0.0324466	0.915666	chr3R	30213314	30213797	-	protein_coding	CecB
FBgn0037782	-4.9597	-2.62338	6.65772	0.0262246	0.915666	chr3R	10055355	10056083	-	protein_coding	Npc2d
FBgn0261856	-4.97503	-2.36067	6.91358	0.0240544	0.915666	chr2R	7000153	7001696	+	pseudogene	CR42785
FBgn0030331	-5.00175	-2.36095	8.66314	0.0138373	0.915666	chrX	11724245	11736617	+	protein_coding	CG15221
FBgn0035607	-5.02304	0.768301	6.6297	0.0266423	0.915666	chr3L	5479789	5483663	+	protein_coding	CG4835
FBgn0052107	-5.10452	-2.59608	5.67812	0.0460298	0.915666	chr3L	12857281	12861305	-	protein_coding	CG32107
FBgn0036321	-5.11149	-0.983474	5.09672	0.0444296	0.915666	chr3L	12885038	12889244	+	protein_coding	CG14120
FBgn0051913	-5.11445	-1.96939	19.5098	0.00112424	0.915666	chr2L	5784030	5784893	+	protein_coding	CG31913
FBgn0032593	-5.12974	2.9392	93.7635	1.76e-07	0.00102883	chr2L	16663453	16676701	-	protein_coding	Trpgamma
FBgn0000277	-5.18312	1.03311	6.36094	0.0296322	0.915666	chr3R	30212155	30212568	+	protein_coding	CecA2
FBgn0265636	-5.23237	-2.54835	12.6419	0.00475525	0.915666	chr2R	7134494	7135095	+	lincRNA	CR44443
FBgn0262211	-5.2651	-2.55655	15.0904	0.00510023	0.915666	chr2R	20584708	20584820	-	pre_miRNA	mir-2498
FBgn0036459	-5.38359	-2.0899	18.4021	0.00138306	0.915666	chr3L	14979619	14982432	+	protein_coding	CG3349
FBgn0045770	-5.39117	-2.27604	5.42007	0.0411719	0.915666	chr3L	10465186	10468974	+	protein_coding	S-Lap3
FBgn0034662	-5.40829	0.174862	5.58012	0.0480443	0.915666	chr2R	21820661	21831409	-	protein_coding	CG13492
FBgn0265939	-5.52226	-2.35841	14.2663	0.00325496	0.915666	chr2L	13642820	13643230	+	lincRNA	CR44726
FBgn0050413	-5.62923	-0.192863	5.5682	0.0384678	0.915666	chr2R	23329542	23330068	-	protein_coding	CG30413
FBgn0000140	-5.63785	6.28295	147.618	7.99e-08	0.00102883	chr3R	24753848	24760513	+	protein_coding	asp
FBgn0032804	-5.7747	-0.811882	11.6602	0.00612101	0.915666	chr2L	19540606	19541540	+	protein_coding	CG13081
FBgn0034483	-5.80712	-1.47687	6.85588	0.0260036	0.915666	chr2R	20211584	20212619	-	protein_coding	CG16894
FBgn0086907	-5.8153	-1.95156	21.513	0.000788229	0.865032	chr2L	16715890	16719635	+	protein_coding	Cyt-c-d
FBgn0264267	-6.05616	-2.1527	16.2024	0.00421441	0.915666	chr2L	1158575	1159355	-	lincRNA	CR43767
FBgn0036229	-6.12176	1.38962	5.54484	0.0407895	0.915666	chr3L	11954082	11956780	+	protein_coding	CG7248
FBgn0039474	-6.15875	0.851874	5.7048	0.0379601	0.915666	chr3R	27020237	27021378	-	protein_coding	CG6283
FBgn0036831	-6.34377	5.33902	5.27739	0.0465475	0.915666	chr3L	18917580	18919259	+	protein_coding	CG6839
FBgn0034663	-6.3454	-0.657084	7.79387	0.016944	0.915666	chr2R	21834229	21835047	-	protein_coding	CG4363
FBgn0012042	-6.42845	2.54272	8.87318	0.0143048	0.915666	chr2R	14747361	14748215	+	protein_coding	AttA
FBgn0036703	-6.46687	-1.85655	26.2148	0.000372464	0.594555	chr3L	17243435	17244746	+	protein_coding	CG7707
FBgn0029812	-6.65447	0.659471	39.105	2.45e-05	0.0859046	chrX	5808953	5810158	+	protein_coding	Prosbeta2R1
FBgn0004427	-6.7631	5.22237	5.45682	0.0436621	0.915666	chr3L	1210716	1211196	-	protein_coding	LysD
FBgn0011555	-7.03749	-0.0850384	7.92522	0.0170503	0.915666	chr2R	11341713	11342760	-	protein_coding	thetaTry
FBgn0034664	-7.0755	-1.38242	7.63439	0.0219723	0.915666	chr2R	21835447	21836357	-	protein_coding	CG4377
FBgn0023197	-7.18243	6.01534	7.01336	0.0260256	0.915666	chr3L	17546738	17549127	-	protein_coding	Jon74E
FBgn0039475	-7.50941	1.23865	5.11599	0.0481075	0.915666	chr3R	27022070	27023217	-	protein_coding	CG6277
FBgn0036833	-7.74932	5.4132	7.02602	0.0259228	0.915666	chr3L	18920429	18922108	-	protein_coding	CG3819
FBgn0033826	-8.06596	1.56648	8.72534	0.0145827	0.915666	chr2R	13297201	13298467	-	protein_coding	CG4734
FBgn0034294	-8.32703	4.4018	8.22232	0.0180787	0.915666	chr2R	18050018	18052107	-	protein_coding	Muc55B
FBgn0010357	-8.72383	5.52665	8.54773	0.0165099	0.915666	chr2R	11346324	11347395	+	protein_coding	betaTry
FBgn0010425	-8.75962	4.84819	9.05816	0.0143148	0.915666	chr2R	11345236	11346066	-	protein_coding	epsilonTry
FBgn0039476	-8.80521	0.175433	6.97706	0.032283	0.915666	chr3R	27024967	27026109	-	protein_coding	CG6271
FBgn0033297	-8.87084	0.089548	6.25761	0.0401108	0.915666	chr2R	8471953	8473961	+	protein_coding	Mal-A8
FBgn0015714	-11.2428	2.27605	320.672	1.67e-07	0.00102883	chr2R	14873952	14875739	+	protein_coding	Cyp6a17

## Sheet: LB_R.W_pv0.05_FC0.5
GeneID	logFC	logCPM	F	PValue	FDR	Chr	start	end	strand	function	name
FBgn0034288	12.521	7.90393	5.80077	0.0387264	0.672599	chr2R	18018664	18020211	+	protein_coding	CG5084
FBgn0036227	12.4616	6.59657	5.89716	0.0374691	0.666703	chr3L	11949838	11952225	+	protein_coding	CG17826
FBgn0015714	11.2428	2.27605	322.747	1.63e-07	0.000477393	chr2R	14873952	14875739	+	protein_coding	Cyp6a17
FBgn0010425	11.0154	4.84819	10.5955	0.0095897	0.487877	chr2R	11345236	11346066	-	protein_coding	epsilonTry
FBgn0038645	10.932	7.20184	5.8098	0.0386065	0.672599	chr3R	18725398	18726434	-	protein_coding	CG7714
FBgn0039470	10.8463	1.90186	6.60417	0.0395394	0.674646	chr3R	27003235	27005469	-	protein_coding	CG6296
FBgn0036362	10.4038	6.89198	5.22861	0.0473726	0.676845	chr3L	13437953	13439009	+	protein_coding	CG10725
FBgn0036831	10.4016	5.33902	8.66984	0.0159541	0.585826	chr3L	18917580	18919259	+	protein_coding	CG6839
FBgn0036952	10.0963	7.90161	5.38756	0.0447488	0.674646	chr3L	20218499	20220420	-	protein_coding	CG6933
FBgn0034294	9.90476	4.4018	9.42331	0.0129613	0.541875	chr2R	18050018	18052107	-	protein_coding	Muc55B
FBgn0036226	9.72308	5.59269	5.15068	0.0487289	0.676845	chr3L	11947674	11949248	+	protein_coding	CG7252
FBgn0051439	9.56032	8.55687	4.9525	0.0524024	0.680312	chr3R	25397787	25400645	-	protein_coding	Muc96D
FBgn0036833	9.39276	5.4132	8.48402	0.0168094	0.592683	chr3L	18920429	18922108	-	protein_coding	CG3819
FBgn0010357	9.13122	5.52665	8.979	0.0146462	0.569271	chr2R	11346324	11347395	+	protein_coding	betaTry
FBgn0034662	8.98112	0.174862	8.63569	0.0202769	0.604432	chr2R	21820661	21831409	-	protein_coding	CG13492
FBgn0033395	8.82321	5.59756	442.667	2.15e-11	3.77e-07	chr2R	9237511	9239831	+	protein_coding	Cyp4p2
FBgn0036229	8.661	1.38962	7.5683	0.0207968	0.607782	chr3L	11954082	11956780	+	protein_coding	CG7248
FBgn0004430	8.60056	5.4025	5.89824	0.0374554	0.666703	chr3L	1227746	1228238	+	protein_coding	LysS
FBgn0036940	8.34111	6.1853	4.86385	0.0541574	0.686661	chr3L	20130450	20131743	-	protein_coding	obst-J
FBgn0054026	8.28226	3.3264	6.14428	0.0343246	0.656126	chrX	9533817	9534625	+	protein_coding	CG34026
FBgn0004428	8.11693	-0.305152	8.18671	0.0214673	0.607782	chr3L	1212826	1213406	+	protein_coding	LysE
FBgn0031000	8.02156	1.52521	7.5209	0.0211314	0.607782	chrX	19215514	19216660	+	protein_coding	Muc18B
FBgn0029812	7.90802	0.659471	45.18	1.15e-05	0.0144215	chrX	5808953	5810158	+	protein_coding	Prosbeta2R1
FBgn0004425	7.88827	6.47483	6.34096	0.0322924	0.65189	chr3L	1207370	1207981	+	protein_coding	LysB
FBgn0023197	7.8797	6.01534	7.84869	0.0201941	0.604067	chr3L	17546738	17549127	-	protein_coding	Jon74E
FBgn0040653	7.83226	-0.292158	10.6732	0.0106458	0.507963	chr2R	20868495	20869321	-	protein_coding	IM4
FBgn0261682	7.75326	2.79145	5.43876	0.0436445	0.674646	chr3L	15526909	15527516	-	protein_coding	CG42729
FBgn0052557	7.70258	3.87875	5.54043	0.0423403	0.674646	chrX	17852957	17856129	-	protein_coding	CG32557
FBgn0004427	7.64692	5.22237	6.31996	0.0325166	0.65189	chr3L	1210716	1211196	-	protein_coding	LysD
FBgn0039453	7.61221	3.03665	5.4802	0.0430594	0.674646	chr3R	26735416	26736307	-	protein_coding	CG6403
FBgn0031580	7.45495	-0.886623	5.49717	0.0476605	0.676845	chr2L	4006040	4006606	+	protein_coding	CG15423
FBgn0260393	7.2257	2.10735	6.27567	0.0321562	0.65189	chr3L	20223931	20225324	+	protein_coding	CG17147
FBgn0085205	7.09482	-1.15696	8.50013	0.0171713	0.594621	chr2L	4004079	4004480	+	protein_coding	CG34176
FBgn0033789	7.0325	3.31353	5.47319	0.0432177	0.674646	chr2R	13049145	13049656	-	protein_coding	CG13324
FBgn0036220	6.78433	-1.42039	5.70623	0.0418386	0.674646	chr3L	11887258	11888981	-	protein_coding	CG5897
FBgn0266935	6.67175	0.65587	78.4898	5.05e-07	0.00126684	chr3L	19090582	19090975	+	lincRNA	CR45386
FBgn0004426	6.67133	0.265167	6.39241	0.0292689	0.64571	chr3L	1210484	1210971	+	protein_coding	LysC
FBgn0036225	6.44741	3.47447	4.97505	0.0518172	0.680312	chr3L	11943639	11944852	-	protein_coding	CG5883
FBgn0038431	6.39761	3.49483	5.84125	0.0379687	0.669889	chr3R	16454491	16455797	+	protein_coding	CG10405
FBgn0011555	6.39527	-0.0850384	7.42188	0.0200367	0.604067	chr2R	11341713	11342760	-	protein_coding	thetaTry
FBgn0033826	6.32243	1.56648	7.04318	0.0243371	0.607782	chr2R	13297201	13298467	-	protein_coding	CG4734
FBgn0034289	6.27431	3.07343	4.83217	0.0545171	0.688088	chr2R	18020267	18022406	+	protein_coding	CG10910
FBgn0264267	6.05616	-2.1527	16.4138	0.00406863	0.377995	chr2L	1158575	1159355	-	lincRNA	CR43767
FBgn0020508	5.95881	2.83454	5.09212	0.0492904	0.676845	chrX	14782961	14784052	-	protein_coding	Ag5r2
FBgn0039474	5.9567	0.851874	5.52075	0.0405663	0.674646	chr3R	27020237	27021378	-	protein_coding	CG6283
FBgn0030928	5.87647	1.82574	4.89466	0.0523851	0.680312	chrX	18491184	18492006	-	protein_coding	CG15044
FBgn0036422	5.67898	2.5654	6.21189	0.0328543	0.65189	chr3L	14400768	14402725	-	protein_coding	CG3868
FBgn0265417	5.66354	-2.19723	7.31501	0.0210694	0.607782	chrX	5812272	5812977	-	protein_coding	CG44329
FBgn0261289	5.64431	-1.81349	12.2068	0.00528949	0.414464	chr3R	28806701	28807501	+	protein_coding	CheB98a
FBgn0037724	5.61227	2.98392	5.714	0.0393126	0.674646	chr3R	9644977	9646154	-	protein_coding	Fst
FBgn0036996	5.61218	-0.0680435	10.0846	0.00828375	0.468716	chr3L	20460682	20462274	+	protein_coding	mag
FBgn0032593	5.54114	2.9392	104.31	9.24e-08	0.000324318	chr2L	16663453	16676701	-	protein_coding	Trpgamma
FBgn0266088	5.45806	-2.07127	20.9813	0.000864117	0.229894	chr2R	24955776	24957359	-	lincRNA	CR44830
FBgn0035743	5.45079	0.241739	5.90411	0.0342039	0.655898	chr3L	7128902	7129673	+	protein_coding	CG15829
FBgn0035751	5.44954	-2.40438	13.7731	0.00364137	0.359295	chr3L	7236799	7238122	-	protein_coding	CG14829
FBgn0030688	5.43109	3.57928	5.54303	0.0420769	0.674646	chrX	15765469	15766445	-	protein_coding	CG8952
FBgn0033860	5.37513	-2.38339	9.78627	0.00999753	0.490354	chr2R	13596676	13598750	+	protein_coding	S-Lap5
FBgn0028561	5.29088	-2.10904	11.9737	0.00560516	0.430082	chr2R	8089481	8091297	+	protein_coding	sut3
FBgn0262211	5.2651	-2.55655	15.3175	0.00490142	0.407887	chr2R	20584708	20584820	-	pre_miRNA	mir-2498
FBgn0038082	5.23211	-2.47276	5.4387	0.0404946	0.674646	chr3R	12739641	12741417	+	protein_coding	CG5724
FBgn0034663	5.15273	-0.657084	6.39902	0.0272574	0.639472	chr2R	21834229	21835047	-	protein_coding	CG4363
FBgn0052107	5.10452	-2.59608	5.76617	0.0447569	0.674646	chr3L	12857281	12861305	-	protein_coding	CG32107
FBgn0266763	4.9525	-1.40337	27.464	0.000136726	0.0749079	chr2R	10946308	10947095	+	lincRNA	CR45228
FBgn0033074	4.91918	2.76438	136.571	1.76e-08	0.000102893	chr2R	6225633	6226884	+	protein_coding	tomboy40
FBgn0038436	4.9016	-2.19842	15.7188	0.00237092	0.31369	chr3R	16477109	16481070	+	protein_coding	Gyc-89Db
FBgn0033215	4.90156	-1.74004	10.8938	0.00542896	0.419943	chr2R	7712577	7714182	+	protein_coding	CG1942
FBgn0052053	4.87604	-2.65479	5.38953	0.0412464	0.674646	chr3L	10090169	10092346	-	protein_coding	CG32053
FBgn0032563	4.8558	-2.51104	9.73245	0.0101497	0.490959	chr2L	15360920	15361627	-	protein_coding	CG15258
FBgn0030929	4.84323	4.73144	5.08731	0.0498092	0.676845	chrX	18493192	18494168	-	protein_coding	CG15043
FBgn0036703	4.82121	-1.85655	19.4166	0.00114364	0.252769	chr3L	17243435	17244746	+	protein_coding	CG7707
FBgn0034440	4.7932	-2.61694	5.14986	0.0451635	0.674646	chr2R	19380542	19384965	+	protein_coding	CG10073
FBgn0262163	4.70316	-2.64081	7.32669	0.0209895	0.607782	chrX	15576354	15576964	+	pseudogene	betaNACtes5
FBgn0262334	4.67518	-2.79883	10.46	0.0127902	0.540975	chr2R	20585313	20585405	-	pre_miRNA	mir-992
FBgn0267104	4.55148	-2.75843	11.4671	0.0063723	0.444181	chr3R	29256484	29257425	+	protein_coding	CG45544
FBgn0038845	4.53085	-2.54039	7.71086	0.0185524	0.603142	chr3R	21005159	21006990	-	protein_coding	CG10827
FBgn0038466	4.51737	0.878927	6.31469	0.0294877	0.645879	chr3R	17008268	17012533	+	protein_coding	CG8907
FBgn0015037	4.49582	3.99257	159.228	6.71e-09	5.89e-05	chr2R	9240040	9242139	+	protein_coding	Cyp4p1
FBgn0031132	4.4855	-2.85173	5.51074	0.0483889	0.676845	chrX	20822145	20825641	+	protein_coding	CG15450
FBgn0052119	4.48333	1.01124	56.4473	3.33e-06	0.00650175	chr3L	13246863	13248702	-	protein_coding	CG32119
FBgn0040723	4.44759	-2.66564	5.41281	0.0408883	0.674646	chr2L	1200670	1201220	+	protein_coding	CG5011
FBgn0067905	4.42709	-2.44189	4.80627	0.0516024	0.680312	chr2R	20870391	20870678	+	protein_coding	IM14
FBgn0267726	4.39811	-2.77844	5.14832	0.0451902	0.674646	chr2L	19183092	19183787	-	protein_coding	CG46059
FBgn0033324	4.38741	-2.86239	5.34375	0.0419616	0.674646	chr2R	8706387	8709486	-	protein_coding	CG14744
FBgn0036013	4.38106	-2.32492	9.38213	0.0112108	0.518349	chr3L	9597853	9598195	+	protein_coding	CG14177
FBgn0028892	4.35196	-2.82505	5.27262	0.0431031	0.674646	chr2L	15433308	15435304	+	protein_coding	CG4161
FBgn0267617	4.35164	-2.73102	7.03093	0.0231318	0.607782	chr3L	21636642	21637314	-	lincRNA	CR45955
FBgn0034229	4.33033	0.0254014	6.59931	0.0255147	0.615114	chr2R	17511512	17513855	+	protein_coding	CG4847
FBgn0054012	4.32117	-2.8553	7.4787	0.0199816	0.604067	chr3L	11108819	11109505	-	protein_coding	CG34012
FBgn0053483	4.32094	-2.60152	6.87035	0.0244054	0.607782	chr3R	30900717	30902161	-	protein_coding	CG33483
FBgn0039085	4.31991	-2.73916	5.58954	0.0382898	0.672331	chr3R	23532944	23534767	-	protein_coding	CG10170
FBgn0032636	4.30801	-2.91951	9.16356	0.0173384	0.594621	chr2L	17433861	17435800	+	protein_coding	CG5043
FBgn0085789	4.29029	-2.4694	6.34357	0.0292218	0.64571	chrY	3047605	3048886	+	pseudogene	CR41506
FBgn0033981	4.27899	-1.1434	12.9528	0.00302247	0.333784	chr2R	14885263	14886947	-	protein_coding	Cyp6a21
FBgn0053125	4.2771	-2.83862	7.33872	0.0209075	0.607782	chr2L	2648359	2652414	-	protein_coding	CG33125
FBgn0051404	4.27328	-2.79927	6.95852	0.0236959	0.607782	chr3R	19375042	19376023	-	protein_coding	CG31404
FBgn0266892	4.26149	-2.92675	8.98174	0.0181321	0.601717	chr2L	14021582	14022033	-	lincRNA	CR45352
FBgn0040069	4.25976	-2.03068	4.8957	0.0445445	0.674646	chrX	6200187	6202559	-	protein_coding	vanin-like
FBgn0034331	4.2552	-0.0445356	6.5288	0.0255466	0.615114	chr2R	18384823	18385589	-	protein_coding	CG15067
FBgn0038218	4.21595	-2.93445	6.74769	0.0330464	0.65189	chr3R	14261390	14262418	-	protein_coding	CG14841
FBgn0051296	4.17657	-2.77323	5.3274	0.0422208	0.674646	chr3R	15530071	15531473	-	protein_coding	CG31296
FBgn0038733	4.1703	-2.83187	5.48897	0.039743	0.674646	chr3R	19781245	19783145	+	protein_coding	CG11407
FBgn0038008	4.16187	-2.75249	7.76129	0.0182584	0.601717	chr3R	12254186	12256592	+	protein_coding	CG3942
FBgn0053801	4.15119	-2.47334	5.20983	0.0441423	0.674646	chr2L	21416952	21417975	+	protein_coding	His1:CG33801
FBgn0266822	4.13739	-1.78426	16.1603	0.00133247	0.272057	chr2L	14032005	14038306	-	lincRNA	CR45284
FBgn0264500	4.13466	-1.36864	17.2819	0.00102335	0.246151	chrX	10210180	10210636	+	lincRNA	CR43899
FBgn0265944	4.1121	-2.88172	7.43934	0.0202369	0.604319	chr2L	14486039	14486752	+	lincRNA	CR44731
FBgn0267088	4.10152	-2.75897	7.72075	0.0184943	0.603142	chrX	7120373	7120741	-	lincRNA	CR45532
FBgn0083038	4.09738	-2.76223	9.43466	0.0110435	0.517103	chr2L	20418347	20418481	+	snoRNA	snoRNA:Psi18S-525a
FBgn0032965	4.095	-2.97203	9.23913	0.0170216	0.594199	chr2L	21896665	21898289	-	protein_coding	CG11629
FBgn0031723	4.08458	-2.92804	7.24425	0.0215616	0.607782	chr2L	5587114	5588414	-	protein_coding	CG7251
FBgn0033369	4.07387	-2.88561	7.35025	0.0208293	0.607782	chr2R	9060460	9061924	-	protein_coding	CG8197
FBgn0035042	4.06058	-2.97734	6.37084	0.0369589	0.666703	chr2R	24639687	24640756	+	protein_coding	CG3640
FBgn0031337	4.02485	-2.91329	5.91758	0.0339775	0.654179	chr2L	1367995	1369050	+	protein_coding	CG14346
FBgn0050160	3.98927	-1.41925	7.38738	0.01699	0.594199	chr2R	7005156	7006136	+	protein_coding	CG30160
FBgn0262266	3.98892	-2.83441	5.0818	0.0463575	0.676845	chrX	280171	280269	-	pre_miRNA	mir-980
FBgn0261925	3.98086	0.524423	9.14861	0.010738	0.509592	chr2L	15864928	15865461	-	protein_coding	CG42792
FBgn0262227	3.96419	-3.01064	5.97175	0.0417743	0.674646	chr2R	20585199	20585295	-	pre_miRNA	mir-991
FBgn0036162	3.9635	-1.19366	10.3823	0.00633361	0.444181	chr3L	11463569	11465864	-	protein_coding	CG6140
FBgn0263408	3.95783	-2.83394	5.56525	0.0386349	0.672599	chr3R	22996453	22997785	+	lincRNA	CR43454
FBgn0261292	3.94089	0.854537	36.6898	3.32e-05	0.0306625	chr2R	16466708	16467522	+	protein_coding	CheB53a
FBgn0034511	3.92619	0.383602	4.69862	0.0534955	0.684641	chr2R	20526310	20526825	+	protein_coding	GNBP-like3
FBgn0040736	3.90266	1.66342	5.59762	0.0387003	0.672599	chr2R	18387894	18388734	+	protein_coding	IM3
FBgn0261293	3.89161	-1.99601	8.36231	0.0121096	0.5344	chr2R	16468208	16468934	+	protein_coding	CheB53b
FBgn0034317	3.85506	-2.33186	4.78928	0.0465944	0.676845	chr2R	18187706	18188573	+	protein_coding	CG14499
FBgn0264991	3.85505	-2.99885	6.02348	0.0327128	0.65189	chr3R	13312854	13313188	-	protein_coding	CG44142
FBgn0035316	3.84477	-2.95369	6.10115	0.0318213	0.65189	chr3L	2210872	2212503	-	protein_coding	CG15878
FBgn0000473	3.82816	0.0607435	19.1756	0.000670277	0.217088	chr2R	6779748	6781491	-	protein_coding	Cyp6a2
FBgn0053092	3.82027	-3.00372	6.04395	0.032475	0.65189	chr3R	21877935	21880696	+	protein_coding	P5CDh2
FBgn0053777	3.80562	-2.91565	5.00906	0.0476763	0.676845	chr3L	4554536	4555236	-	protein_coding	CG33777
FBgn0058100	3.79651	-2.96017	4.99849	0.0478718	0.676845	chr2R	2374630	2375134	+	pseudogene	CR40100
FBgn0013772	3.79524	-1.692	5.93601	0.0292124	0.64571	chr2R	14887170	14889010	-	protein_coding	Cyp6a8
FBgn0040506	3.79301	-3.00709	6.36833	0.0289711	0.64571	chr2L	12925610	12929823	+	protein_coding	ACXE
FBgn0035709	3.78795	-2.87536	5.41896	0.0407944	0.674646	chr3L	6664223	6665641	-	protein_coding	eIF4E-4
FBgn0031367	3.78142	-2.05443	13.8438	0.00238238	0.31369	chr2L	1831626	1832565	-	protein_coding	c-cup
FBgn0035453	3.77846	-3.00776	6.00091	0.0329775	0.65189	chr3L	3615381	3616682	+	protein_coding	CG10357
FBgn0266535	3.77057	-2.96218	5.19917	0.0443218	0.674646	chr3L	13208542	13208958	-	lincRNA	CR45096
FBgn0051601	3.76054	-3.05854	5.96187	0.0419035	0.674646	chr2L	22040726	22043877	-	protein_coding	CG31601
FBgn0085280	3.7596	2.12377	5.2087	0.045381	0.674646	chr3L	17671621	17683581	+	protein_coding	CG34251
FBgn0082926	3.73126	-2.92178	4.71216	0.0535582	0.684945	chr2R	14622569	14622649	+	snoRNA	snoRNA:Me28S-U1848
FBgn0034865	3.73109	-2.96882	6.18833	0.0308554	0.648675	chr2R	23470164	23471775	-	protein_coding	Or59b
FBgn0039596	3.72167	-2.7586	6.3058	0.0296095	0.645879	chr3R	28748383	28751661	-	protein_coding	CG10000
FBgn0028963	3.71977	-1.1026	13.1057	0.00289972	0.322255	chr2R	12842664	12844704	+	protein_coding	Or49b
FBgn0261924	3.71797	-2.44457	6.95532	0.019864	0.604067	chr2L	15863199	15863663	+	lincRNA	CR42791
FBgn0032434	3.67139	-2.94848	5.05169	0.046898	0.676845	chr2L	12446079	12448132	-	protein_coding	CG5421
FBgn0265636	3.66734	-2.54835	8.11944	0.0163243	0.585826	chr2R	7134494	7135095	+	lincRNA	CR44443
FBgn0035563	3.65869	-2.32308	7.96097	0.0138898	0.559382	chr3L	4634435	4634789	-	protein_coding	CG13716
FBgn0039326	3.65058	-1.32902	4.66069	0.0506489	0.680312	chr3R	25321052	25322757	-	protein_coding	CG10562
FBgn0010241	3.64615	-1.94414	4.87116	0.0450076	0.674646	chr2R	14246965	14252597	+	protein_coding	Mdr50
FBgn0267011	3.64278	-3.09347	5.1659	0.0542399	0.686661	chr2L	19537964	19538223	+	lincRNA	CR45455
FBgn0033326	3.64249	-3.04386	5.57482	0.0384985	0.672599	chr2R	8710397	8712913	-	protein_coding	CG14743
FBgn0050250	3.63736	-3.09417	5.17076	0.0541512	0.686661	chr2R	12334233	12334305	-	tRNA	tRNA:CR30250
FBgn0020280	3.6371	-3.04455	5.57587	0.0384835	0.672599	chr3R	4876004	4878533	-	protein_coding	laf
FBgn0030462	3.63686	-2.99974	4.93817	0.0490061	0.676845	chrX	13257391	13258495	-	protein_coding	CG15742
FBgn0262180	3.59883	-2.78583	5.74775	0.036132	0.665643	chr3R	9517523	9517599	+	pre_miRNA	mir-2283
FBgn0030014	3.59835	-3.00119	4.82803	0.0511629	0.680312	chrX	8160053	8161552	+	protein_coding	CG15337
FBgn0053267	3.59715	2.86752	6.44651	0.029454	0.645879	chr3L	11564482	11572796	+	protein_coding	CG33267
FBgn0267308	3.59602	-3.05048	5.64903	0.0374606	0.666703	chr3L	6162694	6163102	-	lincRNA	CR45744
FBgn0265909	3.58267	-3.10071	5.23727	0.0529571	0.680951	chr2L	4348317	4348678	+	lincRNA	CR44698
FBgn0261831	3.5496	-2.91962	5.89813	0.0342162	0.655898	chr2L	8144390	8145107	-	protein_coding	CG42763
FBgn0264940	3.54352	-3.05578	5.33669	0.0420733	0.674646	chrX	22764524	22766663	-	lincRNA	CR44109
FBgn0265268	3.51975	-2.5334	7.90723	0.0141505	0.563422	chr3L	18603424	18605415	+	protein_coding	CG18234
FBgn0042086	3.48049	-0.145757	6.96584	0.0212799	0.607782	chr2R	6998847	6999848	+	protein_coding	Tsp42Eb
FBgn0052405	3.44745	-1.70034	10.0016	0.00712111	0.445939	chr3L	6139222	6139974	-	protein_coding	Cpr65Av
FBgn0039398	3.429	-2.51197	4.96299	0.0433032	0.674646	chr3R	25959278	25961686	+	protein_coding	CG14540
FBgn0063667	3.42865	-0.102034	13.6128	0.00253191	0.318015	chr3L	1201870	1203036	-	protein_coding	CG32335
FBgn0034205	3.41849	-2.70214	4.93107	0.0491417	0.676845	chr2R	17195202	17197159	+	protein_coding	CG10950
FBgn0263321	3.40148	1.83456	8.06468	0.0157641	0.585826	chr2L	1442626	1443832	+	protein_coding	CG43402
FBgn0043575	3.38721	1.28201	13.1322	0.00330054	0.351238	chr2R	8716949	8717695	+	protein_coding	PGRP-SC2
FBgn0050378	3.38674	-2.78056	5.05392	0.0468577	0.676845	chr2R	7950338	7951492	+	protein_coding	CG30378
FBgn0033997	3.33347	0.694881	32.3657	6.21e-05	0.0495708	chr2R	15204653	15206334	+	pseudogene	Ir51a
FBgn0036652	3.30182	-2.50231	4.77609	0.0468562	0.676845	chr3L	16673963	16676264	+	protein_coding	CG13032
FBgn0047199	3.29886	-3.10313	4.98853	0.0480569	0.676845	chr3R	13948419	13949742	+	protein_coding	CG31517
FBgn0037818	3.29554	-1.30361	13.1346	0.00287713	0.322255	chr3R	10675559	10677251	-	protein_coding	CG6465
FBgn0037772	3.28912	-0.142689	12.0169	0.00391854	0.371922	chr3R	9997162	10000314	+	protein_coding	Spn85F
FBgn0053286	3.2721	-1.94977	11.6286	0.004378	0.394222	chr3L	20970811	20974700	-	protein_coding	CG33286
FBgn0030332	3.2439	5.02552	50.6912	1.5e-05	0.0175257	chrX	11763473	11764590	-	protein_coding	CG9360
FBgn0052745	3.23817	-0.240789	28.8847	0.000107727	0.0675565	chrX	6280232	6280752	-	pseudogene	CR32745
FBgn0031440	3.20656	-2.60239	4.80323	0.0463195	0.676845	chr2L	2609993	2611283	+	protein_coding	CG15395
FBgn0267085	3.20194	-2.72816	6.78694	0.0251002	0.612964	chrX	5810491	5811006	+	lincRNA	CR45529
FBgn0039154	3.18658	2.55413	4.91721	0.0507714	0.680312	chr3R	24137894	24140936	+	protein_coding	Npc2f
FBgn0031514	3.15725	-0.628132	5.47998	0.0363003	0.665643	chr2L	3275799	3280534	-	protein_coding	CG3332
FBgn0029795	3.13565	-0.383942	6.80785	0.021813	0.607782	chrX	5732739	5734614	+	protein_coding	CG15773
FBgn0033397	3.1252	0.323244	16.7217	0.00116603	0.252769	chr2R	9242319	9244410	+	protein_coding	Cyp4p3
FBgn0029811	3.10611	0.0226813	9.97086	0.00728802	0.445939	chrX	5804676	5805344	+	protein_coding	Cpr5C
FBgn0265939	3.10391	-2.35841	6.74827	0.0254305	0.615002	chr2L	13642820	13643230	+	lincRNA	CR44726
FBgn0266256	3.07483	-1.89196	7.65576	0.0154488	0.585826	chr3R	26607046	26608440	+	lincRNA	CR44951
FBgn0030949	3.0726	-2.23767	6.74729	0.0214477	0.607782	chrX	18709864	18711638	+	protein_coding	Cyp308a1
FBgn0038153	3.06978	-2.70693	5.13838	0.0453623	0.674646	chr3R	13420278	13423140	+	protein_coding	Ir87a
FBgn0031134	3.05422	-3.14594	5.45171	0.0402984	0.674646	chrX	20867988	20869397	-	protein_coding	CG1314
FBgn0036311	3.0408	-2.5687	4.60063	0.0505091	0.680312	chr3L	12781324	12784377	+	protein_coding	CG17666
FBgn0029639	3.00265	-1.56171	4.65009	0.0494463	0.676845	chrX	2885185	2885914	-	protein_coding	CG14419
FBgn0265724	2.99269	-2.58352	5.59026	0.0334946	0.65189	chr3L	2882813	2883400	+	lincRNA	CR44531
FBgn0038914	2.98464	-1.47552	10.0018	0.00712069	0.445939	chr3R	21883923	21884454	-	protein_coding	fit
FBgn0016974	2.97217	-1.24999	13.9691	0.0023056	0.31369	chrX	6361495	6363310	-	pseudogene	swaPsi
FBgn0032981	2.94112	-0.706989	9.80564	0.00757024	0.451236	chr2L	22175414	22183991	+	protein_coding	CG3635
FBgn0261566	2.91877	-1.68999	4.82129	0.0459664	0.676492	chr2L	14587919	14588234	-	protein_coding	CG42680
FBgn0053470	2.91417	-0.368248	6.5157	0.0240093	0.607782	chr2R	13411738	13413085	+	protein_coding	CG33470
FBgn0263235	2.91253	-0.652255	4.58166	0.0522867	0.680312	chr2L	12111109	12112256	+	protein_coding	Phae2
FBgn0052072	2.91002	-2.14795	4.6645	0.0491416	0.676845	chr3L	11101874	11103030	-	protein_coding	Elo68alpha
FBgn0263338	2.87084	-2.72442	5.84477	0.0302768	0.648317	chr2L	17792411	17793694	+	lincRNA	CR43419
FBgn0036716	2.86874	-2.15248	6.50438	0.0234871	0.607782	chr3L	17380025	17382728	-	protein_coding	CG13728
FBgn0051288	2.86659	-0.929073	7.9955	0.0137252	0.557384	chr3R	25297959	25299557	-	protein_coding	CG31288
FBgn0267281	2.84493	-2.48318	5.4027	0.0361246	0.665643	chr2L	1142868	1143216	+	lincRNA	CR45717
FBgn0083029	2.84118	-2.55539	5.45185	0.0354127	0.661864	chr2L	20421927	20422063	+	snoRNA	snoRNA:Psi18S-525j
FBgn0024177	2.83562	-1.58848	6.59319	0.0227163	0.607782	chr3L	6604365	6606032	-	protein_coding	zpg
FBgn0260000	2.82644	-1.23202	7.94343	0.0139743	0.560215	chr2L	20263418	20264424	-	protein_coding	CG17570
FBgn0034129	2.82171	-2.12026	4.53216	0.0520254	0.680312	chr2R	16445985	16447512	+	protein_coding	CG15925
FBgn0004228	2.81124	0.316759	6.64293	0.0235654	0.607782	chr3L	15517423	15519592	-	protein_coding	mex1
FBgn0264835	2.79519	1.70615	27.7287	0.000130703	0.0740328	chr2R	1368920	1371468	-	lincRNA	CR44043
FBgn0033140	2.79105	-2.57874	5.17972	0.0395736	0.674646	chr2R	7068571	7069896	+	protein_coding	CG12836
FBgn0031560	2.76755	2.47192	10.1127	0.00831308	0.468716	chr2L	3695031	3695411	-	protein_coding	CG16713
FBgn0036482	2.75727	-2.20056	6.4613	0.0238721	0.607782	chr3L	15127939	15131378	-	protein_coding	CG13457
FBgn0265814	2.74088	-0.781937	6.10399	0.0273654	0.639908	chr2L	1618636	1626021	-	lincRNA	CR44603
FBgn0053287	2.72436	-2.80497	5.29543	0.0377377	0.666703	chr3L	20966765	20970663	-	protein_coding	CG33287
FBgn0034844	2.69965	-1.70952	5.45049	0.0354321	0.661864	chr2R	23323658	23326745	+	protein_coding	CG9861
FBgn0026176	2.69653	1.72133	60.4797	2.26e-06	0.00496896	chr2R	12139294	12140229	-	protein_coding	SkpB
FBgn0039051	2.67944	1.35022	10.8485	0.00586182	0.439032	chr3R	23095689	23097240	+	protein_coding	CG17109
FBgn0259229	2.646	0.0595883	5.51546	0.0358487	0.665643	chr2L	1219292	1229802	+	protein_coding	CG42329
FBgn0030200	2.64556	-2.8348	4.78793	0.046621	0.676845	chrX	10417428	10418219	+	protein_coding	RabX2
FBgn0033302	2.61661	0.499844	10.9677	0.00531092	0.414464	chr2R	8564186	8567202	-	protein_coding	Cyp6a14
FBgn0031155	2.61309	-2.35123	4.42664	0.054469	0.688088	chrX	21095679	21102206	-	protein_coding	CG15446
FBgn0000078	2.60117	-0.239282	5.984	0.0292719	0.64571	chr2R	17124763	17126369	+	protein_coding	Amy-d
FBgn0050274	2.58816	-1.52144	11.6969	0.00429281	0.390944	chr2R	22825092	22828903	+	protein_coding	CG30274
FBgn0265635	2.58256	-1.55174	4.93739	0.0437705	0.674646	chr2R	6820559	6822596	-	lincRNA	CR44442
FBgn0031561	2.5376	2.46681	5.12621	0.045558	0.674678	chr2L	3696217	3696658	-	protein_coding	CG16712
FBgn0263469	2.53624	-1.56089	6.9224	0.0201052	0.604067	chr2L	12433024	12433180	-	snoRNA	snoRNA:SC35-b
FBgn0032789	2.51029	-1.81898	5.52884	0.0343303	0.656126	chr2L	19487489	19488691	+	protein_coding	CG13083
FBgn0032891	2.48071	-0.189961	8.68007	0.0108864	0.513915	chr2L	20832848	20835840	-	protein_coding	Oseg5
FBgn0033202	2.46529	-1.55422	7.33185	0.0173308	0.594621	chr2R	7659103	7660588	-	protein_coding	CG1339
FBgn0034157	2.40021	-0.517309	6.50586	0.023474	0.607782	chr2R	16779904	16783171	+	protein_coding	resilin
FBgn0261857	2.39333	-1.64913	6.91179	0.0201837	0.604067	chr3R	20734747	20735323	+	pseudogene	CR42786
FBgn0050026	2.36152	0.103557	5.48984	0.0355247	0.66189	chr2R	11408575	11409449	-	protein_coding	CG30026
FBgn0003983	2.34477	-1.78581	6.06669	0.0277634	0.643065	chr2L	13411140	13411631	-	protein_coding	Vm34Ca
FBgn0030384	2.29119	-1.77005	4.63142	0.0498443	0.676845	chrX	12373117	12374448	+	protein_coding	CG2577
FBgn0036575	2.26915	-1.43618	8.10551	0.0132157	0.546954	chr3L	16136486	16137879	-	protein_coding	CG5157
FBgn0051860	2.25407	1.35437	29.2362	0.000101688	0.0675565	chr2L	12164240	12166704	+	protein_coding	ZnT33D
FBgn0260874	2.25212	2.6307	50.7989	5.96e-06	0.0100952	chr3L	19799277	19803427	+	protein_coding	Ir76a
FBgn0266209	2.23974	-1.83536	7.80904	0.0146417	0.569271	chr2L	18795823	18796180	-	lincRNA	CR44904
FBgn0085244	2.20386	1.39797	11.5103	0.00453008	0.399717	chr2R	6831295	6831793	-	protein_coding	CG34215
FBgn0035577	2.16971	0.779973	25.1832	0.000204226	0.0996113	chr3L	4829091	4833591	-	protein_coding	CG13708
FBgn0032483	2.13652	-1.69192	4.43783	0.0542034	0.686661	chr2L	13210772	13211814	-	protein_coding	CG15482
FBgn0041581	2.13374	2.84782	4.90019	0.0495394	0.676845	chr2R	14749222	14750165	+	protein_coding	AttB
FBgn0262607	2.10658	2.51303	7.87761	0.0159123	0.585826	chrX	18129584	18130178	-	protein_coding	CG43133
FBgn0039818	2.09818	-1.00034	4.65363	0.0493712	0.676845	chr3R	31106361	31109191	-	protein_coding	CG11318
FBgn0035941	2.03671	0.574911	12.2775	0.00364144	0.359295	chr3L	8958856	8960921	+	protein_coding	CG13313
FBgn0030852	2.01779	1.03109	14.1127	0.00222101	0.31369	chrX	17629790	17632047	-	protein_coding	CG8316
FBgn0013771	1.9741	1.25995	7.50936	0.0163504	0.585826	chr2R	14879355	14881372	-	protein_coding	Cyp6a9
FBgn0032551	1.96232	-0.714079	4.76284	0.0471208	0.676845	chr2L	14783300	14784598	-	protein_coding	CG18636
FBgn0026874	1.95932	-0.541212	11.1042	0.00510077	0.41241	chrX	803423	804921	-	protein_coding	CG13358
FBgn0037042	1.95541	-1.79096	6.29146	0.0254631	0.615002	chr3L	20991672	20992930	+	protein_coding	CG12984
FBgn0016675	1.91624	1.301	11.8435	0.00411653	0.380432	chr2L	19417446	19418274	+	protein_coding	Lectin-galC1
FBgn0052088	1.9159	-0.377421	11.4348	0.00463036	0.400122	chr3L	11728344	11732048	+	protein_coding	CG32088
FBgn0015770	1.90344	-0.0339731	9.1382	0.00936623	0.482292	chr3R	7365938	7369305	-	protein_coding	MstProx
FBgn0024977	1.89361	-0.778563	5.29734	0.0377082	0.666703	chrX	2726677	2727568	+	protein_coding	CG2709
FBgn0033869	1.86996	-1.08534	5.95602	0.0289849	0.64571	chr2R	13794776	13805231	+	protein_coding	Cpr50Cb
FBgn0013773	1.86715	-0.869736	5.57422	0.0337106	0.651899	chr2R	14871365	14873705	+	protein_coding	Cyp6a22
FBgn0054045	1.86139	0.16265	5.29518	0.0377415	0.666703	chr2R	19330888	19335188	+	protein_coding	CG34045
FBgn0267439	1.85078	-1.64731	4.65818	0.0492751	0.676845	chr2L	10392866	10393434	-	lincRNA	CR45789
FBgn0033131	1.83291	1.39929	25.5599	0.000190812	0.0957275	chr2R	7039129	7039813	+	pseudogene	CR12842
FBgn0262847	1.82905	-1.3098	4.74069	0.0475672	0.676845	chrX	11597747	11599638	+	pseudogene	CR43211
FBgn0035426	1.82265	-1.22085	4.93057	0.0438961	0.674646	chr3L	3243273	3244294	-	protein_coding	CG12078
FBgn0038851	1.79919	-0.809669	8.33406	0.0122259	0.5344	chr3R	21074006	21076798	+	protein_coding	dmrt93B
FBgn0031528	1.79808	-0.184532	11.8857	0.00406735	0.377995	chr2L	3373566	3375711	-	protein_coding	CG15412
FBgn0264857	1.78918	-0.0171979	10.2694	0.00655613	0.444346	chr3R	16831115	16923231	-	lincRNA	iab-8
FBgn0040968	1.78328	-0.319722	5.84065	0.0303259	0.648317	chr2L	11842827	11844012	+	protein_coding	CG14933
FBgn0036330	1.77971	0.405844	15.6467	0.00150911	0.289573	chr3L	13006816	13007881	+	protein_coding	CG11263
FBgn0036727	1.74589	1.34551	8.03861	0.0135229	0.556084	chr3L	17470126	17474517	+	protein_coding	CG7589
FBgn0015572	1.70128	0.238111	5.65029	0.0327009	0.65189	chr3R	7536686	7538615	-	protein_coding	alpha-Est4
FBgn0013813	1.69101	-0.627403	7.01816	0.0194126	0.604067	chr3R	28486952	28519398	+	protein_coding	Dhc98D
FBgn0051248	1.67367	0.798521	18.8542	0.000718828	0.217972	chr3R	7129319	7130908	+	protein_coding	CG31248
FBgn0047092	1.67355	-0.970833	7.21284	0.0180885	0.601717	chrX	7145599	7149850	-	lincRNA	CR32730
FBgn0040582	1.66408	-0.559811	7.0499	0.0191892	0.604067	chr3R	22087074	22088501	+	protein_coding	CG5791
FBgn0034413	1.66339	0.431809	5.29789	0.0376998	0.666703	chr2R	19035491	19036387	-	protein_coding	CG15115
FBgn0037915	1.65359	-0.669914	6.22649	0.0261043	0.621652	chr3R	11575900	11578745	-	protein_coding	CG6790
FBgn0034098	1.64163	2.5251	26.7653	0.000154219	0.0796451	chr2R	16238102	16240722	-	protein_coding	krimp
FBgn0033542	1.63874	0.237018	6.63155	0.0223925	0.607782	chr2R	10725269	10727272	+	protein_coding	CG12309
FBgn0030641	1.621	0.0681552	10.7845	0.00560902	0.430082	chrX	15462721	15466812	+	protein_coding	CG6299
FBgn0034175	1.59556	0.705561	23.0356	0.000304998	0.136384	chr2R	16998609	17000126	-	protein_coding	ste24b
FBgn0000158	1.56812	0.677692	8.72348	0.0107307	0.509592	chr3R	25243038	25245057	-	protein_coding	bam
FBgn0051054	1.56385	0.633799	6.47553	0.0237441	0.607782	chr3R	27960767	27961476	+	pseudogene	CR31054
FBgn0265577	1.52443	-0.475865	5.50857	0.0346114	0.656168	chr2R	17671067	17671295	+	lincRNA	CR44404
FBgn0264792	1.51863	-0.80135	5.99878	0.0285056	0.64571	chr3R	29458778	29459278	-	lincRNA	CR44022
FBgn0262816	1.49408	1.17043	5.84846	0.0302328	0.648317	chr2R	16380515	16385765	+	protein_coding	CG43187
FBgn0039525	1.49051	1.62964	17.7637	0.000916519	0.232204	chr3R	27559378	27561319	-	protein_coding	CG5646
FBgn0000140	1.46809	6.28295	14.6402	0.00269182	0.319695	chr3R	24753848	24760513	+	protein_coding	asp
FBgn0050379	1.45979	3.14261	34.5106	4.52e-05	0.0396641	chr2R	7939955	7941870	+	protein_coding	CG30379
FBgn0033388	1.45217	2.0341	15.3697	0.00161552	0.289573	chr2R	9162036	9164967	-	protein_coding	CG8046
FBgn0033874	1.44932	1.24075	6.15167	0.0268662	0.633213	chr2R	13836418	13839363	+	protein_coding	CG6347
FBgn0051041	1.43553	-1.53656	4.50591	0.0526208	0.680312	chr3R	29590069	29590906	-	protein_coding	CG31041
FBgn0262095	1.40975	-0.740637	5.14522	0.0401411	0.674646	chr2L	18946298	18947086	+	lincRNA	CR42848
FBgn0030222	1.4021	0.489579	10.0185	0.00708368	0.445939	chrX	10623724	10627112	-	protein_coding	CG9806
FBgn0038784	1.3942	0.260302	9.0461	0.00965096	0.487877	chr3R	20306215	20307537	-	protein_coding	CG4362
FBgn0052212	1.37184	0.882976	14.989	0.00177613	0.295582	chr3L	19487559	19488348	+	protein_coding	CG32212
FBgn0267323	1.37182	-0.207313	6.50687	0.0234651	0.607782	chr3L	6786659	6787105	-	lincRNA	CR45759
FBgn0263116	1.36866	3.07546	15.0295	0.00175819	0.295582	chr2R	19022324	19032642	-	protein_coding	5-HT1B
FBgn0000442	1.36736	-0.776342	7.37078	0.0170911	0.59421	chr2L	786152	790798	-	protein_coding	Pkg21D
FBgn0039811	1.35688	2.27479	7.77578	0.0148126	0.570383	chr3R	30936588	30937102	-	protein_coding	CG15550
FBgn0265634	1.35399	0.228443	8.01309	0.0136422	0.557384	chr4	194731	195900	+	lincRNA	CR44441
FBgn0031791	1.32642	3.8693	17.7945	0.000910155	0.232204	chr2L	6255858	6256822	+	protein_coding	AANATL2
FBgn0041246	1.31955	0.269924	5.93643	0.0292076	0.64571	chr2L	11114013	11115823	+	protein_coding	Gr32a
FBgn0267339	1.30734	0.500337	5.79365	0.0308929	0.648675	chr3R	24149019	24150203	-	protein_coding	p38c
FBgn0261584	1.29969	4.00422	18.392	0.000795949	0.225812	chr2R	22941876	22945147	+	protein_coding	CG42694
FBgn0044048	1.27724	3.64305	5.76608	0.0335684	0.65189	chr3L	9823348	9823897	-	protein_coding	Ilp5
FBgn0014396	1.26689	1.65376	11.4045	0.00467139	0.400122	chr2L	3493985	3508119	-	protein_coding	tim
FBgn0038741	1.26643	4.0614	27.817	0.00012876	0.0740328	chr3R	19875973	19877514	-	protein_coding	CG17186
FBgn0053508	1.26572	4.03166	10.4304	0.00671979	0.445256	chr2L	21086789	21088751	-	protein_coding	ppk13
FBgn0085440	1.24052	1.55448	7.47778	0.0164517	0.586311	chrX	13161713	13189164	-	protein_coding	CG34411
FBgn0034756	1.23667	0.843829	7.11857	0.0187161	0.603142	chr2R	22652572	22654530	-	protein_coding	Cyp6d2
FBgn0262405	1.22671	-0.235532	8.89964	0.0101247	0.490959	chr3R	21621878	21622021	-	pre_miRNA	mir-998
FBgn0003996	1.22547	3.46155	4.81518	0.0487497	0.676845	chrX	2790598	2796466	-	protein_coding	w
FBgn0263504	1.22352	1.17057	9.19446	0.00919707	0.480806	chrX	22487853	22490872	-	lincRNA	CR43493
FBgn0034262	1.20747	0.791085	8.95887	0.00992994	0.490354	chr2R	17690274	17695353	-	protein_coding	swi2
FBgn0016920	1.18797	0.182336	4.74721	0.0474354	0.676845	chr2L	5346236	5365760	+	protein_coding	nompC
FBgn0028899	1.18795	1.61655	8.64689	0.0110072	0.516778	chr2L	16330559	16337885	-	protein_coding	CG31817
FBgn0053632	1.18239	-0.911658	6.00175	0.0284727	0.64571	chr2R	12522022	12522731	+	protein_coding	CG33632
FBgn0031232	1.17811	-0.922475	4.56663	0.0512554	0.680312	chr2L	204742	207297	-	protein_coding	CG11617
FBgn0031707	1.16249	-0.0763173	5.98911	0.0286132	0.64571	chr2L	5517736	5518949	+	protein_coding	CG14020
FBgn0040377	1.15708	0.436195	5.74621	0.0314779	0.65189	chrX	2579090	2580560	-	protein_coding	Vha36-3
FBgn0035317	1.1482	0.199717	5.83063	0.0304457	0.648317	chr3L	2229645	2235253	+	protein_coding	Oseg2
FBgn0037205	1.14684	0.307454	5.10601	0.0407979	0.674646	chr3L	22901911	22905470	+	protein_coding	BoYb
FBgn0013812	1.14497	1.06633	7.12685	0.01866	0.603142	chr3R	21024579	21042499	-	protein_coding	Dhc93AB
FBgn0035915	1.13742	0.148721	5.02511	0.0421934	0.674646	chr3L	8617234	8619474	+	protein_coding	S-Lap1
FBgn0028490	1.13497	8.66441	31.4974	7.1e-05	0.0520771	chr2L	11523020	11528205	-	protein_coding	CG31705
FBgn0039809	1.12715	3.40835	15.4086	0.00160005	0.289573	chr3R	30881791	30883503	-	protein_coding	CG15547
FBgn0051089	1.12596	-0.170591	5.65809	0.0325993	0.65189	chr3R	25902642	25904178	+	protein_coding	CG31089
FBgn0051174	1.11963	1.21308	6.52267	0.0233259	0.607782	chr3R	21868680	21869514	-	protein_coding	CG31174
FBgn0040571	1.11849	2.68837	6.52361	0.0233177	0.607782	chr3R	20036420	20056097	-	protein_coding	CG17193
FBgn0050343	1.10071	-0.17533	4.62334	0.0500178	0.677149	chr2R	9252020	9253255	+	protein_coding	CG30343
FBgn0030593	1.09828	3.69151	11.2908	0.0048288	0.403756	chrX	14901843	14905549	-	protein_coding	CG9512
FBgn0032337	1.0958	3.66563	16.737	0.00116184	0.252769	chr2L	11083458	11085229	-	protein_coding	AstCC
FBgn0266348	1.08893	0.556962	5.00274	0.042589	0.674646	chrX	22657323	22797682	+	lincRNA	CR44997
FBgn0038020	1.07929	4.64348	10.3705	0.00685483	0.445939	chr3R	12366162	12367564	-	protein_coding	GstD9
FBgn0001263	1.06945	1.08443	7.11287	0.0187548	0.603142	chr2R	22855687	22858794	-	protein_coding	inaD
FBgn0053509	1.06211	3.20049	5.10118	0.0416294	0.674646	chr2L	21084604	21086506	-	protein_coding	CG33509
FBgn0039504	1.06211	0.0627707	4.73978	0.0475857	0.676845	chr3R	27265456	27266423	+	protein_coding	CG14260
FBgn0038140	1.05938	3.19841	16.2071	0.0013176	0.272057	chr3R	13338329	13345106	+	protein_coding	PK2-R1
FBgn0038261	1.03013	0.922411	6.97455	0.0197245	0.604067	chr3R	14798985	14801163	+	protein_coding	CG14856
FBgn0033387	1.02795	1.2691	5.24786	0.0384801	0.672599	chr2R	9157906	9161436	-	protein_coding	CG8008
FBgn0052625	1.01367	1.9873	5.95429	0.0290045	0.64571	chrX	13756163	13756826	-	protein_coding	CG32625
FBgn0033628	1.01172	3.11679	19.1877	0.000668516	0.217088	chr2R	11373606	11377109	+	protein_coding	CG13203
FBgn0053914	1.01052	2.05921	8.47888	0.0116432	0.526188	chr2R	7036767	7039050	-	protein_coding	CG33914
FBgn0051161	1.0069	-0.527952	4.62628	0.0499547	0.676845	chr3R	22616510	22618300	+	protein_coding	CG31161
FBgn0035168	1.00454	3.39562	16.7847	0.0011489	0.252769	chr3L	843925	851080	+	protein_coding	CG13889
FBgn0032850	0.99548	1.13942	5.08653	0.0411288	0.674646	chr2L	20097580	20103375	+	protein_coding	Kua
FBgn0264907	0.993986	5.23004	11.5708	0.00470134	0.400732	chr3R	4750408	4773197	-	protein_coding	CG44098
FBgn0266167	0.988238	0.796586	6.47957	0.0237079	0.607782	chr2L	10004309	10005043	-	lincRNA	CR44873
FBgn0035855	0.986666	0.778184	7.1579	0.0184512	0.603142	chr3L	8201077	8202417	-	protein_coding	CG7366
FBgn0037107	0.986043	6.27562	19.2521	0.000659273	0.217088	chr3L	21619999	21625647	-	protein_coding	CG7166
FBgn0031811	0.978165	1.62805	5.63933	0.0328442	0.65189	chr2L	6412314	6415335	+	protein_coding	CG13982
FBgn0032598	0.976856	2.61694	12.3266	0.0035918	0.359295	chr2L	16738849	16742610	+	protein_coding	ChLD3
FBgn0035861	0.962921	0.897508	6.42336	0.0242171	0.607782	chr3L	8231813	8240601	-	protein_coding	CG7213
FBgn0038880	0.961763	2.04628	8.20173	0.012788	0.540975	chr3R	21276663	21293998	-	protein_coding	SIFaR
FBgn0035041	0.957321	3.15406	12.4488	0.0034716	0.356478	chr2R	24615422	24638588	-	protein_coding	CG13594
FBgn0028374	0.956416	5.85592	10.9501	0.00587576	0.439032	chr3R	12526187	12529076	+	protein_coding	Hug
FBgn0038956	0.950331	2.01612	6.87992	0.0204216	0.605715	chr3R	22386488	22389714	-	protein_coding	CG5379
FBgn0019661	0.948564	9.04364	5.97023	0.0316733	0.65189	chrX	3857229	3862697	-	lincRNA	roX1
FBgn0032484	0.939849	2.57724	11.037	0.00520303	0.41241	chr2L	13212334	13215350	-	protein_coding	kek4
FBgn0052412	0.932901	4.47669	16.6104	0.00119703	0.254942	chr3L	5900834	5902456	-	protein_coding	QC
FBgn0263345	0.930651	1.0425	5.72085	0.031796	0.65189	chr3L	22850110	22854434	+	lincRNA	CR43426
FBgn0039178	0.929622	5.04093	13.3376	0.00272437	0.319695	chr3R	24283954	24288617	+	protein_coding	CG6356
FBgn0051436	0.926892	2.6774	6.18698	0.0265034	0.627187	chr3R	25304136	25305651	+	protein_coding	CG31436
FBgn0262593	0.914935	4.66026	4.72073	0.051147	0.680312	chr3L	2895016	2959579	+	protein_coding	Shab
FBgn0039420	0.904007	2.98211	10.441	0.00622146	0.444181	chr3R	26262661	26277050	+	protein_coding	CG6154
FBgn0040370	0.903975	4.0466	9.37202	0.008686	0.476617	chrX	283185	294962	-	protein_coding	CG13375
FBgn0053696	0.903837	2.10153	8.59004	0.0112178	0.518349	chr3L	9644108	9659433	+	protein_coding	CNMaR
FBgn0035094	0.893909	3.46906	8.00967	0.0136583	0.557384	chr2R	25183627	25255318	-	protein_coding	CG9380
FBgn0010317	0.892186	1.6535	5.50727	0.0346296	0.656168	chr3L	3466427	3468098	+	protein_coding	CycJ
FBgn0011581	0.883898	5.28719	13.1373	0.00287507	0.322255	chr3R	24341550	24343825	+	protein_coding	Ms
FBgn0012344	0.882571	5.49432	12.082	0.00388364	0.370613	chr3R	9638181	9650706	+	protein_coding	Dh44
FBgn0260657	0.878804	5.14655	10.3275	0.00652406	0.444181	chr3L	4556086	4592295	+	protein_coding	CG42540
FBgn0037521	0.87871	5.9447	5.88581	0.0326887	0.65189	chr3R	7804664	7810014	-	protein_coding	CG2993
FBgn0000449	0.870718	3.45717	7.51079	0.0162601	0.585826	chr3L	4062291	4064551	+	protein_coding	dib
FBgn0039855	0.87022	0.783284	5.47236	0.0351204	0.658846	chr3R	31590580	31592316	+	protein_coding	CG1638
FBgn0263846	0.865773	5.12304	6.24334	0.0275557	0.641711	chr2L	3757255	3769525	+	protein_coding	CG43707
FBgn0010414	0.862763	2.18723	5.27861	0.0379981	0.669889	chr2R	24404594	24411074	-	protein_coding	SerT
FBgn0031294	0.862679	9.09942	8.20708	0.0135628	0.556424	chr2L	1008377	1048053	-	protein_coding	IA-2
FBgn0085380	0.857176	3.48195	7.459	0.0165619	0.586311	chr2L	4694720	4722465	+	protein_coding	CG34351
FBgn0035756	0.855591	3.78434	8.25687	0.0125502	0.5388	chr3L	7266191	7312896	-	protein_coding	unc-13-4A
FBgn0085395	0.850532	3.31055	10.1081	0.00688986	0.445939	chr2L	9370308	9415156	-	protein_coding	Shawl
FBgn0035816	0.845625	3.2657	5.85095	0.0302032	0.648317	chr3L	7747343	7750552	+	protein_coding	CG13685
FBgn0050187	0.845309	3.32245	6.11443	0.0272552	0.639472	chr2R	22916842	22918790	-	protein_coding	CG30187
FBgn0260658	0.843254	4.10724	4.56322	0.0529745	0.680951	chrX	3891496	3930578	-	protein_coding	CG42541
FBgn0260475	0.842089	1.55327	7.91104	0.0141318	0.563422	chr2R	13412768	13414620	-	protein_coding	CG30059
FBgn0259145	0.842021	4.73469	5.23461	0.0407148	0.674646	chr2R	22740998	22798289	-	protein_coding	CG42260
FBgn0086251	0.841099	3.87629	16.582	0.00120509	0.254942	chr2L	21145136	21148546	-	protein_coding	del
FBgn0038653	0.839499	3.81385	6.97874	0.0196943	0.604067	chr3R	18799279	18849224	-	protein_coding	CG18208
FBgn0050106	0.835134	2.39137	7.19436	0.0182095	0.601717	chr2R	17646847	17665068	-	protein_coding	CCHa1-R
FBgn0037824	0.832294	0.761401	4.86286	0.0451654	0.674646	chr3R	10706973	10707460	+	protein_coding	CG14684
FBgn0266721	0.830822	2.22683	6.60884	0.0225836	0.607782	chr3R	10120398	10121400	-	protein_coding	gammaSnap2
FBgn0039415	0.820911	3.40846	8.35524	0.0121386	0.5344	chr3R	26133153	26137148	+	protein_coding	CG6142
FBgn0266227	0.819061	3.37269	4.44116	0.0541248	0.686661	chr3R	4375083	4377600	+	lincRNA	CR44922
FBgn0028407	0.816173	4.61838	12.6798	0.00325678	0.348694	chr2R	12055088	12062866	+	protein_coding	Drep-3
FBgn0027513	0.814365	4.18597	11.0198	0.00522965	0.41241	chr2R	8898728	8900211	-	protein_coding	ana2
FBgn0050361	0.80838	4.34361	8.61743	0.0111157	0.517371	chr2R	8473955	8532294	-	protein_coding	mtt
FBgn0085261	0.808117	4.55159	6.77821	0.0216693	0.607782	chr2R	12164908	12165812	-	protein_coding	CG34232
FBgn0036206	0.808027	0.627362	4.94893	0.0435591	0.674646	chr3L	11790211	11793283	-	protein_coding	CG5964
FBgn0051760	0.798987	4.99499	11.3042	0.00481003	0.403756	chr2L	12142779	12170508	+	protein_coding	CG31760
FBgn0031986	0.798498	1.22836	4.48172	0.0531769	0.683053	chr2L	8124328	8125799	+	protein_coding	CG8673
FBgn0036411	0.797063	2.39934	6.65115	0.0222291	0.607782	chr3L	14103480	14108118	-	protein_coding	Sox21a
FBgn0039536	0.791719	4.807	6.81468	0.0214889	0.607782	chr3R	27662438	27677099	+	protein_coding	unc80
FBgn0031945	0.790056	3.2411	10.4306	0.0062412	0.444181	chr2L	7767627	7775033	+	protein_coding	CG7191
FBgn0052783	0.789109	1.55148	4.77105	0.0469566	0.676845	chrX	3945042	3948460	+	protein_coding	CG32783
FBgn0035733	0.786695	2.98735	6.65999	0.0221559	0.607782	chr3L	7058929	7077462	-	protein_coding	CG8641
FBgn0052641	0.77861	4.65505	9.92677	0.00728883	0.445939	chrX	13184477	13184996	+	protein_coding	CG32641
FBgn0034568	0.773227	1.62124	5.66998	0.0324454	0.65189	chr2R	20986832	20991171	-	protein_coding	CG3216
FBgn0264087	0.769829	3.55658	8.26407	0.0125196	0.5388	chr2L	7642004	7675078	-	protein_coding	Slob
FBgn0004394	0.760282	2.48315	5.09498	0.0409849	0.674646	chr2L	12657164	12686306	+	protein_coding	pdm2
FBgn0053062	0.758795	2.70027	11.1439	0.00504152	0.41241	chr3L	19441718	19446444	-	protein_coding	CG33062
FBgn0085410	0.757232	3.01413	5.5935	0.0334513	0.65189	chr2L	5824003	5856767	+	protein_coding	TrissinR
FBgn0052225	0.753997	4.60244	11.1317	0.0050596	0.41241	chr3L	20304309	20306283	-	protein_coding	CG32225
FBgn0033381	0.745838	5.14162	13.532	0.00258673	0.319695	chr2R	9122124	9123309	+	protein_coding	GstE13
FBgn0085425	0.744722	1.67859	7.73453	0.0150278	0.574887	chr2R	21092221	21101453	+	protein_coding	CG34396
FBgn0037326	0.744063	5.59566	7.2326	0.0185999	0.603142	chr3R	5414526	5458394	+	protein_coding	CG14669
FBgn0011603	0.743783	3.82109	10.4397	0.00622389	0.444181	chr2L	4467999	4477022	-	protein_coding	ine
FBgn0037408	0.742785	2.80881	6.65267	0.0222166	0.607782	chr3R	6187314	6195403	+	protein_coding	NPFR
FBgn0036851	0.742444	2.30502	4.91812	0.0441263	0.674646	chr3L	19105380	19138975	-	protein_coding	CG14082
FBgn0038098	0.742372	1.99996	6.32188	0.0251692	0.612964	chr3R	12967774	12977471	-	protein_coding	CG7381
FBgn0038419	0.740005	3.61154	4.58812	0.0507823	0.680312	chr3R	16345824	16349226	-	protein_coding	CG14879
FBgn0011589	0.739613	3.67356	7.46691	0.0165154	0.586311	chr2R	17873938	17926695	+	protein_coding	Elk
FBgn0053516	0.738179	4.04607	13.1192	0.00288913	0.322255	chr2L	2058789	2109878	-	protein_coding	dpr3
FBgn0005616	0.737113	5.9911	13.4767	0.00262504	0.319695	chr2L	3462217	3466112	-	protein_coding	msl-2
FBgn0265597	0.73432	4.99747	6.55087	0.023455	0.607782	chrX	12988614	13079070	+	protein_coding	rad
FBgn0004575	0.73149	6.4815	6.66068	0.0234394	0.607782	chr3R	10190688	10222442	+	protein_coding	Syn
FBgn0051706	0.731026	5.52974	4.92246	0.0461855	0.676845	chr2L	11529037	11531052	-	protein_coding	CG31706
FBgn0037304	0.727521	1.01196	4.67043	0.0490169	0.676845	chr3R	5253152	5255403	+	protein_coding	CG1113
FBgn0266805	0.726563	0.834006	4.60098	0.0505016	0.680312	chr2R	8019175	8026595	+	lincRNA	CR45267
FBgn0266354	0.722926	4.68586	5.01357	0.043471	0.674646	chrX	16969068	17066732	-	protein_coding	CG45002
FBgn0036368	0.722234	2.09689	5.14362	0.0401677	0.674646	chr3L	13450769	13465539	+	protein_coding	CG10738
FBgn0000246	0.722195	3.2189	10.902	0.00541572	0.419943	chr3R	15789472	15792579	-	protein_coding	c(3)G
FBgn0031299	0.721788	4.38414	13.8359	0.00238735	0.31369	chr2L	1083090	1102504	-	protein_coding	CG4629
FBgn0034270	0.715926	3.65277	15.5598	0.0015416	0.289573	chr2R	17737621	17739685	-	protein_coding	CG6401
FBgn0250908	0.715016	4.51619	4.70724	0.0492639	0.676845	chr3R	26645281	26681966	-	protein_coding	beat-VII
FBgn0031765	0.714174	3.46368	5.74481	0.0314954	0.65189	chr2L	6025869	6034423	-	protein_coding	CG9109
FBgn0034501	0.71394	6.84417	9.9994	0.00712592	0.445939	chr2R	20308776	20316917	-	protein_coding	CG13868
FBgn0259821	0.712739	4.41659	10.345	0.00640611	0.444181	chr3R	4077938	4104326	+	protein_coding	CG42402
FBgn0035231	0.71221	4.03017	8.17283	0.0129148	0.541875	chr3L	1553492	1555315	+	protein_coding	Cct2
FBgn0032797	0.711912	6.12988	11.1791	0.00498953	0.41132	chr2L	19508952	19517204	-	protein_coding	CG10186
FBgn0052547	0.710164	2.78721	6.41552	0.0242892	0.607782	chrX	18443026	18479487	-	protein_coding	CG32547
FBgn0033274	0.708417	1.5514	5.03526	0.0420152	0.674646	chr2R	8172363	8173613	-	protein_coding	CG14757
FBgn0011676	0.702134	3.09903	5.40429	0.0361012	0.665643	chr2L	10804273	10837511	-	protein_coding	Nos
FBgn0038092	0.701948	4.68508	7.29293	0.0175745	0.595741	chr3R	12916055	12934813	+	protein_coding	beat-Vb
FBgn0039770	0.697449	4.27516	9.73995	0.0077281	0.45363	chr3R	30435176	30443599	-	protein_coding	CG15537
FBgn0024150	0.695866	5.26899	6.58276	0.0230462	0.607782	chr3L	21136446	21171930	-	protein_coding	Ac78C
FBgn0053543	0.694077	4.12296	8.61151	0.0111377	0.517371	chr2L	1997101	2006313	-	protein_coding	CG33543
FBgn0052432	0.692007	4.33129	5.83637	0.030377	0.648317	chr3L	20844331	20885188	-	protein_coding	CG32432
FBgn0036789	0.691387	4.1877	7.1006	0.0188385	0.603723	chr3L	18485136	18502557	-	protein_coding	AstC-R2
FBgn0264748	0.689208	1.40008	4.7358	0.0476667	0.676845	chr3L	18068727	18070150	-	protein_coding	CG44006
FBgn0039007	0.688837	3.40496	6.95206	0.0198877	0.604067	chr3R	22700581	22702084	-	protein_coding	CCAP
FBgn0015577	0.688311	5.46198	6.77442	0.0215316	0.607782	chr3R	7493920	7505098	-	protein_coding	alpha-Est9
FBgn0013995	0.68654	3.31409	6.16226	0.0267568	0.632332	chr3R	20978182	21015613	+	protein_coding	Calx
FBgn0085459	0.684838	1.62827	5.02252	0.0422389	0.674646	chr2R	7943441	7944475	+	protein_coding	CG34430
FBgn0030257	0.678271	3.43445	6.36831	0.0247283	0.610377	chrX	11044755	11049540	+	protein_coding	CG11160
FBgn0267428	0.677405	3.92991	4.93273	0.0438563	0.674646	chr2R	432218	705848	+	protein_coding	CG45781
FBgn0053639	0.675947	3.00558	4.75281	0.0473225	0.676845	chrX	18210811	18226076	-	protein_coding	CG33639
FBgn0260995	0.67057	4.86215	5.42838	0.0361233	0.665643	chr2R	3066498	3191011	+	protein_coding	CG42596
FBgn0053147	0.669365	4.33695	6.99773	0.019558	0.604067	chr2R	18718113	18754675	+	protein_coding	Hs3st-A
FBgn0050203	0.66557	4.59936	7.50514	0.0162928	0.585826	chr2R	12310688	12313834	+	protein_coding	CG30203
FBgn0038143	0.661802	5.12668	9.7308	0.00775038	0.45363	chr3R	13373103	13379775	-	protein_coding	CG9813
FBgn0000038	0.661658	5.49135	7.27377	0.0176959	0.59596	chr3L	4429348	4435993	+	protein_coding	nAChRbeta1
FBgn0037976	0.657767	2.40638	4.89324	0.0445907	0.674646	chr3R	11994174	12005473	-	protein_coding	Tk
FBgn0050158	0.65624	3.91761	6.02611	0.0282042	0.64571	chr2R	6891759	6922613	+	protein_coding	CG30158
FBgn0038084	0.649535	3.52793	7.28869	0.0176012	0.595741	chr3R	12746035	12783192	-	protein_coding	beat-Vc
FBgn0032857	0.648633	4.16077	4.93458	0.0438222	0.674646	chr2L	20385292	20414800	-	protein_coding	CG10947
FBgn0028496	0.644084	4.53762	5.20154	0.0392193	0.674646	chr2R	18456601	18498026	-	protein_coding	CG30116
FBgn0250757	0.642092	5.76676	9.66814	0.00790502	0.456837	chr3R	25907021	25921046	+	protein_coding	CG42235
FBgn0037717	0.638633	3.24122	7.77965	0.0147926	0.570383	chr3R	9581305	9586648	+	protein_coding	CG8301
FBgn0020372	0.635227	5.78438	6.86426	0.0206804	0.607782	chr2R	23878196	23880860	+	protein_coding	TM4SF
FBgn0036713	0.634927	3.73497	5.45124	0.0354213	0.661864	chr3L	17344946	17349666	-	protein_coding	Mip
FBgn0261999	0.632089	3.74131	4.64264	0.0496047	0.676845	chr2L	16231474	16241527	+	protein_coding	CG42817
FBgn0031306	0.631411	6.89217	6.93492	0.0201777	0.604067	chr2L	1134692	1141156	+	protein_coding	CG4577
FBgn0001078	0.629186	5.52404	5.83491	0.0307363	0.648675	chr3L	18750606	18801309	-	protein_coding	ftz-f1
FBgn0030613	0.628637	5.1609	6.23039	0.0260652	0.621652	chrX	15089681	15113744	+	protein_coding	Rab3-GEF
FBgn0031855	0.627286	2.22342	4.51979	0.052305	0.680312	chr2L	6742501	6756133	+	protein_coding	CG11221
FBgn0038641	0.626567	5.10495	6.06122	0.0278223	0.643065	chr3R	18680603	18686739	+	protein_coding	CG7708
FBgn0034162	0.625363	3.59746	4.92537	0.0439921	0.674646	chr2R	16869401	16871851	+	protein_coding	CG6426
FBgn0028645	0.625029	3.55153	5.23474	0.0386878	0.672599	chr2L	15905133	15962435	-	protein_coding	beat-Ib
FBgn0083975	0.62425	4.41509	5.56831	0.0337905	0.652009	chr3R	20204808	20245473	+	protein_coding	Nlg4
FBgn0037923	0.623888	3.20181	9.14125	0.00935697	0.482292	chr3R	11625050	11626638	-	protein_coding	CG6813
FBgn0038172	0.623673	4.15583	4.65373	0.0493692	0.676845	chr3R	13703083	13705402	-	protein_coding	Adgf-D
FBgn0259818	0.623456	4.0444	7.51579	0.0162313	0.585826	chr2L	144230	153300	-	protein_coding	CG42399
FBgn0260932	0.622565	2.37959	4.52439	0.0522008	0.680312	chr2R	11886066	11887603	+	protein_coding	cuff
FBgn0030574	0.620029	6.7007	9.47762	0.00839767	0.468716	chrX	14584732	14602580	-	protein_coding	CG9413
FBgn0039617	0.619064	4.50205	5.6347	0.0329048	0.65189	chr3R	28925003	28970372	-	protein_coding	CG14521
FBgn0023416	0.618265	5.8021	6.34069	0.0252259	0.613493	chr2L	21632586	21647964	+	protein_coding	Ac3
FBgn0030634	0.617884	3.21054	6.59482	0.0227024	0.607782	chrX	15380370	15385441	-	protein_coding	CG9164
FBgn0035084	0.616143	1.91822	5.79364	0.030893	0.648675	chr2R	24943391	24945201	-	protein_coding	CG15861
FBgn0033358	0.615294	4.97941	6.26878	0.0256848	0.616962	chr2R	8963163	8968184	-	protein_coding	CG8216
FBgn0035495	0.615136	7.80884	5.77759	0.0314424	0.65189	chr3L	4087580	4092706	+	protein_coding	CG14989
FBgn0035171	0.614455	3.44844	5.40916	0.0360301	0.665643	chr3L	865395	871701	+	protein_coding	CG12502
FBgn0034567	0.61406	4.43215	4.99921	0.042652	0.674646	chr2R	20983837	20986500	-	protein_coding	CG15651
FBgn0003082	0.612932	6.24379	16.9754	0.00109875	0.252769	chr2R	7825288	7827319	+	protein_coding	phr
FBgn0024944	0.611911	3.58255	4.50267	0.0526949	0.680312	chr3R	20689017	20714577	-	protein_coding	Oamb
FBgn0032911	0.611747	2.49138	4.64183	0.0496219	0.676845	chr2L	21075404	21081053	+	protein_coding	tadr
FBgn0041627	0.611074	4.9083	19.5015	0.000624844	0.217088	chr2L	15768629	15771159	-	protein_coding	Ku80
FBgn0044050	0.609949	4.94474	6.09368	0.0274747	0.641528	chr3L	9801297	9802120	-	protein_coding	Ilp3
FBgn0033192	0.60869	4.86474	4.51606	0.0527992	0.680312	chr2R	7540110	7564435	+	protein_coding	Corin
FBgn0030052	0.608386	7.18743	9.43773	0.00850527	0.470774	chrX	8574305	8588528	+	protein_coding	CG12065
FBgn0035170	0.607194	3.77446	4.73607	0.0476611	0.676845	chr3L	852719	857248	-	protein_coding	dpr20
FBgn0033108	0.605287	6.68274	4.92464	0.0453064	0.674646	chr2R	6828355	6838360	+	protein_coding	CG15236
FBgn0033744	0.605274	4.18724	5.82067	0.0305654	0.648317	chr2R	12474423	12487986	+	protein_coding	Dh44-R2
FBgn0029896	0.604398	8.23566	5.83435	0.0305073	0.648317	chrX	6720003	6739986	-	protein_coding	CG3168
FBgn0036984	0.60424	4.85115	8.47533	0.0116571	0.526188	chr3L	20407102	20410566	-	protein_coding	CG13248
FBgn0039277	0.603517	3.91837	5.35398	0.0368469	0.666703	chr3R	25109225	25112516	-	protein_coding	CG13650
FBgn0027654	0.602024	5.5625	9.62316	0.00801824	0.461614	chr3R	30517058	30527037	-	protein_coding	jdp
FBgn0020907	0.60182	2.80745	5.07289	0.0413624	0.674646	chr3R	16574542	16583663	-	protein_coding	Scp2
FBgn0039170	0.600746	2.28572	5.21476	0.0390066	0.674646	chr3R	24227022	24228538	+	protein_coding	CG13609
FBgn0029810	0.597792	7.24116	7.51134	0.016257	0.585826	chrX	5792139	5794543	+	protein_coding	CG12239
FBgn0259986	0.595044	5.58885	6.37404	0.0246745	0.610377	chr3L	4153617	4160932	-	protein_coding	nab
FBgn0259242	0.594404	4.16437	5.577	0.033673	0.65189	chrX	6423122	6524323	-	protein_coding	CG42340
FBgn0261262	0.591217	5.82704	4.97328	0.0439973	0.674646	chr3R	18929195	18978088	+	protein_coding	CG42613
FBgn0039332	0.59007	6.68379	4.88939	0.0458042	0.675863	chr3R	25381064	25382781	-	protein_coding	alrm
FBgn0035157	0.58622	5.27643	8.66809	0.0109298	0.514522	chr3L	693082	699144	-	protein_coding	CG13894
FBgn0003975	0.584251	3.45049	4.5216	0.052264	0.680312	chr2R	12884631	12899385	+	protein_coding	vg
FBgn0035922	0.583631	5.01526	8.2412	0.0126173	0.540359	chr3L	8647144	8651011	+	protein_coding	Pex7
FBgn0032782	0.580832	3.09622	4.77779	0.0468224	0.676845	chr2L	19432573	19435841	+	protein_coding	Rab9
FBgn0262870	0.580786	6.31711	5.53522	0.0349168	0.657532	chr3L	4629603	4687317	-	protein_coding	axo
FBgn0000395	0.575295	5.45402	11.1905	0.00497286	0.41132	chr2R	21355014	21379464	-	protein_coding	cv-2
FBgn0029839	0.573143	3.08882	5.8492	0.030224	0.648317	chrX	6078707	6081372	-	protein_coding	CG4660
FBgn0010114	0.568841	6.48807	7.50978	0.016266	0.585826	chr2R	9227784	9247249	-	protein_coding	hig
FBgn0004513	0.567676	6.70427	6.84726	0.0206689	0.607782	chr3L	6240499	6245746	-	protein_coding	Mdr65
FBgn0261089	0.56532	3.50692	5.1576	0.0399362	0.674646	chr2L	17592259	17604387	+	protein_coding	Sytalpha
FBgn0036770	0.563013	4.55537	5.33228	0.0371741	0.666703	chr3L	17898888	17907812	-	protein_coding	Prestin
FBgn0038818	0.560139	6.19588	6.50746	0.0234599	0.607782	chr3R	20652566	20659904	-	protein_coding	Nep4
FBgn0267733	0.558387	4.87745	16.7305	0.00116363	0.252769	chr2R	4782889	4785362	+	lincRNA	CR46064
FBgn0028408	0.55818	5.87975	4.66684	0.0498988	0.676845	chr2R	9291855	9302821	+	protein_coding	Drep-2
FBgn0013467	0.556127	6.41191	5.09652	0.0416364	0.674646	chr2R	15155436	15190292	+	protein_coding	igl
FBgn0034731	0.554496	3.90731	4.94824	0.0435718	0.674646	chr2R	22454740	22472995	+	protein_coding	CG10384
FBgn0038532	0.551107	5.791	8.44208	0.0117882	0.52888	chr3R	17647678	17669985	+	protein_coding	CG14322
FBgn0038034	0.547995	3.63295	5.60154	0.0333438	0.65189	chr3R	12396006	12398929	-	pseudogene	Cyp9f3Psi
FBgn0030090	0.546728	4.37732	5.78531	0.0309948	0.648675	chrX	9121972	9135099	-	protein_coding	fend
FBgn0032840	0.546518	5.30126	6.58058	0.0228239	0.607782	chr2L	20027914	20056373	+	protein_coding	sNPF
FBgn0025814	0.543814	6.0723	14.8962	0.00181803	0.295582	chrX	21042124	21044107	+	protein_coding	Mgstl
FBgn0030189	0.539271	4.43513	10.6135	0.0059047	0.439325	chrX	10326463	10328946	+	protein_coding	CG2909
FBgn0000422	0.53894	4.97395	8.84719	0.0103009	0.495542	chr2L	19116482	19120306	-	protein_coding	Ddc
FBgn0034389	0.534828	3.62727	4.44854	0.0539508	0.686661	chr2R	18761757	18774824	+	protein_coding	Mctp
FBgn0003483	0.531495	3.51006	6.41941	0.0242534	0.607782	chr3R	15837418	15844415	+	protein_coding	spn-E
FBgn0004878	0.531116	6.13135	6.94993	0.0199032	0.604067	chr3R	5712974	5716805	-	protein_coding	cas
FBgn0261090	0.530996	4.80342	4.92064	0.0440797	0.674646	chr3L	15014694	15064977	-	protein_coding	Sytbeta
FBgn0032744	0.529578	4.26739	13.5655	0.00256383	0.319278	chr2L	19043534	19045148	-	protein_coding	Ttc19
FBgn0029833	0.529414	6.96946	9.97427	0.0071818	0.445939	chrX	6037891	6039576	+	protein_coding	CG5941
FBgn0051989	0.528063	4.4028	9.07206	0.00956969	0.487877	chr2L	5525904	5535958	+	protein_coding	Cap-D3
FBgn0004118	0.52254	5.43132	4.87814	0.0448753	0.674646	chr3R	24509227	24515106	-	protein_coding	nAChRbeta2
FBgn0261794	0.521015	6.82549	9.82135	0.00753304	0.451236	chr2R	23907653	23925066	+	protein_coding	kcc
FBgn0026439	0.520137	7.12326	7.07545	0.0190116	0.604067	chr2L	9333566	9341925	+	protein_coding	Eaat1
FBgn0038246	0.507758	5.37694	5.14274	0.0401823	0.674646	chr3R	14609641	14618987	+	protein_coding	CG14853
FBgn0011288	0.506001	5.79514	7.1762	0.0183295	0.60271	chr3L	24074179	24299205	+	protein_coding	Snap25
FBgn0265262	0.505583	7.02308	6.76555	0.021303	0.607782	chr2L	13000769	13004107	-	protein_coding	Vha68-1
FBgn0030358	0.501893	5.07183	4.545	0.051737	0.680312	chrX	11926423	11930850	-	protein_coding	CG10362
FBgn0023179	0.498368	6.44172	5.48867	0.0348901	0.657532	chr3R	26697696	26714159	-	protein_coding	amon
FBgn0034978	0.497268	5.91944	5.98432	0.0286666	0.64571	chr2R	24116791	24123263	+	protein_coding	CG3257
FBgn0015834	-0.496189	8.54418	9.75675	0.00768736	0.452961	chr2L	4966366	4967775	-	protein_coding	Trip1
FBgn0015521	-0.49702	9.7247	5.39538	0.036232	0.665643	chr2L	2856069	2857029	+	protein_coding	RpS21
FBgn0037440	-0.498108	5.62646	6.42818	0.024173	0.607782	chr3R	6371025	6376044	-	protein_coding	CG1041
FBgn0040890	-0.499005	4.05825	6.61422	0.0225381	0.607782	chrX	19494419	19494992	-	protein_coding	ksh
FBgn0034705	-0.500227	4.29447	9.35218	0.00874144	0.47668	chr2R	22177418	22182879	-	protein_coding	CG11170
FBgn0031260	-0.500744	7.53906	6.05082	0.0279347	0.644375	chr2L	542785	544653	-	protein_coding	Spp
FBgn0038868	-0.503687	4.93509	5.72063	0.0317987	0.65189	chr3R	21215078	21216226	+	protein_coding	CG5862
FBgn0019830	-0.504205	6.27562	6.67732	0.0220132	0.607782	chr2L	2768589	2770069	-	protein_coding	colt
FBgn0027539	-0.5045	5.18046	7.88033	0.0142831	0.565717	chr3R	24805444	24814012	-	protein_coding	CG5807
FBgn0036300	-0.506897	4.75306	6.06872	0.0277416	0.643065	chr3L	12534589	12535513	+	protein_coding	CG10688
FBgn0034061	-0.50707	5.09038	7.27047	0.0177169	0.59596	chr2R	16006892	16007667	-	protein_coding	CG8386
FBgn0031320	-0.507511	5.58506	9.31963	0.0088333	0.477314	chr2L	1182296	1184020	-	protein_coding	CG5126
FBgn0039227	-0.507549	6.64223	7.97828	0.0138069	0.558609	chr3R	24799966	24805259	-	protein_coding	polybromo
FBgn0011016	-0.509889	7.82393	9.86859	0.00742246	0.451016	chr3L	16129616	16130983	+	protein_coding	SsRbeta
FBgn0050291	-0.510944	5.79967	8.1952	0.0128165	0.540975	chr2R	21007754	21009576	-	protein_coding	CG30291
FBgn0051648	-0.511335	3.38784	5.85726	0.0301284	0.648317	chr2L	5526956	5527854	+	protein_coding	CG31648
FBgn0015298	-0.511717	5.436	9.04412	0.00965719	0.487877	chr3L	7347309	7348034	-	protein_coding	Srp19
FBgn0038923	-0.515246	4.65914	9.43015	0.0085259	0.470774	chr3R	22023526	22024341	+	protein_coding	mRpL35
FBgn0061492	-0.516725	5.64244	4.7982	0.0464184	0.676845	chr3L	6094986	6096517	+	protein_coding	loj
FBgn0265177	-0.517149	4.86008	7.40072	0.0169093	0.594199	chr2R	16196383	16196928	+	protein_coding	CG44242
FBgn0010411	-0.518354	10.7071	5.61363	0.033183	0.65189	chr2R	20263978	20264848	+	protein_coding	RpS18
FBgn0262954	-0.519514	5.33202	5.87976	0.0298633	0.64737	chr2R	15144967	15145519	-	protein_coding	Rpb12
FBgn0029709	-0.519638	7.13715	5.99427	0.0285557	0.64571	chrX	4540907	4542506	+	protein_coding	CHOp24
FBgn0038981	-0.523718	5.90638	9.30947	0.00886218	0.477314	chr3R	22520086	22528663	-	protein_coding	CG5346
FBgn0069242	-0.523925	5.98395	6.42176	0.0242318	0.607782	chr3R	9684468	9685476	-	protein_coding	eca
FBgn0000109	-0.525416	3.38211	4.64454	0.0495643	0.676845	chr3L	1883794	1885019	-	protein_coding	Aprt
FBgn0038855	-0.525444	5.22796	7.18594	0.018265	0.601717	chr3R	21102198	21105113	+	protein_coding	CG5745
FBgn0022224	-0.525981	3.81114	4.88649	0.0447175	0.674646	chr2R	6810010	6810530	-	protein_coding	ubl
FBgn0038627	-0.526621	3.08596	4.57534	0.0510629	0.680312	chr3R	18573090	18590726	+	protein_coding	CG7694
FBgn0035675	-0.527763	4.65567	5.95774	0.0289655	0.64571	chr3L	6075535	6076258	+	protein_coding	CG6610
FBgn0014427	-0.528225	6.40873	5.95616	0.0289833	0.64571	chr3R	29200453	29201770	+	protein_coding	CG11899
FBgn0263852	-0.528915	6.41908	6.39875	0.0244441	0.607782	chr2L	8383611	8384137	-	protein_coding	l(2)k12914
FBgn0028956	-0.530864	6.65479	7.07194	0.0190359	0.604067	chr2R	17448532	17452598	-	protein_coding	mthl3
FBgn0036556	-0.531695	7.09406	8.32206	0.0122756	0.5344	chr3L	15992668	16004736	-	protein_coding	CG5830
FBgn0040308	-0.533119	6.10057	9.75873	0.00768259	0.452961	chr3L	3042358	3044174	+	protein_coding	Jafrac2
FBgn0028737	-0.533289	9.65773	6.99344	0.0195887	0.604067	chr2R	16868221	16869280	+	protein_coding	Ef1beta
FBgn0267398	-0.534042	8.12806	10.0181	0.00708463	0.445939	chr2R	1343402	1345119	-	protein_coding	Yeti
FBgn0034753	-0.535663	10.4528	14.4527	0.00203469	0.306191	chr2R	22644645	22646344	-	protein_coding	CG2852
FBgn0037913	-0.535778	8.45974	9.03633	0.00968177	0.487877	chr3R	11559895	11567054	-	protein_coding	fabp
FBgn0086357	-0.536083	9.44757	10.3328	0.00643016	0.444181	chr2L	6477181	6480575	-	protein_coding	Sec61alpha
FBgn0027496	-0.53609	6.43246	5.97049	0.0288216	0.64571	chr2L	6489089	6490194	+	protein_coding	epsilonCOP
FBgn0030930	-0.540599	6.98164	5.38023	0.0364556	0.665643	chrX	18495066	18499986	-	protein_coding	GalNAc-T2
FBgn0003890	-0.542901	5.70186	5.59219	0.0334688	0.65189	chr3R	27967007	27988384	-	protein_coding	betaTub97EF
FBgn0025684	-0.54431	5.24342	5.1386	0.0402511	0.674646	chr2L	4446669	4448635	-	protein_coding	MFS18
FBgn0033085	-0.544651	3.00762	5.59802	0.0333908	0.65189	chr2R	6668149	6668738	+	protein_coding	CG15908
FBgn0083167	-0.546646	6.98575	11.0146	0.00523762	0.41241	chrX	10460735	10461878	+	protein_coding	Neb-cGP
FBgn0260856	-0.546817	3.90863	5.95055	0.0290469	0.64571	chr3L	5366454	5367381	+	protein_coding	Membrin
FBgn0086710	-0.548074	10.094	7.81172	0.0146281	0.569271	chr2L	19008030	19009306	-	protein_coding	RpL30
FBgn0025700	-0.548922	7.88238	8.32738	0.0122536	0.5344	chr2L	9917220	9918176	-	protein_coding	CG5885
FBgn0010222	-0.550908	5.38999	5.6333	0.0329232	0.65189	chr3R	9042507	9050555	-	protein_coding	Nmdmc
FBgn0030680	-0.553389	5.71513	12.5642	0.0033623	0.353524	chrX	15741342	15746231	-	protein_coding	CG8944
FBgn0039294	-0.554567	3.06542	6.3805	0.024614	0.610377	chr3R	25224155	25232321	-	protein_coding	Cad96Cb
FBgn0036662	-0.554589	4.41413	6.43426	0.0241174	0.607782	chr3L	16783009	16785246	+	protein_coding	CG9706
FBgn0038808	-0.555332	5.13176	7.31162	0.017457	0.595741	chr3R	20580114	20580764	+	protein_coding	Srp14
FBgn0052230	-0.555582	7.2216	10.196	0.00670572	0.445256	chr3L	23339325	23345936	+	protein_coding	CG32230
FBgn0002780	-0.555775	8.9903	7.49	0.0163805	0.585826	chr3R	32052059	32054974	+	protein_coding	mod
FBgn0036342	-0.556395	4.38953	6.55037	0.0230842	0.607782	chr3L	13046976	13048919	+	protein_coding	CG11279
FBgn0030669	-0.558048	5.15241	7.00695	0.0194922	0.604067	chrX	15700171	15701259	-	protein_coding	CG9240
FBgn0262601	-0.558696	7.44962	5.33045	0.0372581	0.666703	chr2L	10425482	10426627	-	protein_coding	SmB
FBgn0037718	-0.562104	6.83985	12.8297	0.00312565	0.338786	chr3R	9586941	9589581	+	protein_coding	P58IPK
FBgn0037279	-0.565755	6.27186	24.6924	0.000223363	0.106001	chr3R	4811443	4816025	+	protein_coding	CG1129
FBgn0265045	-0.566353	5.34007	7.67879	0.0153243	0.583686	chr2R	15946932	15989498	-	protein_coding	Strn-Mlck
FBgn0001233	-0.566977	11.4404	9.68624	0.00786	0.456837	chr3L	3192968	3197059	+	protein_coding	Hsp83
FBgn0033683	-0.567897	4.57146	5.93559	0.0292172	0.64571	chr2R	12138694	12139324	+	protein_coding	CG18343
FBgn0052281	-0.574365	3.99189	13.7944	0.00241353	0.31369	chr3L	3169374	3170913	+	protein_coding	CG32281
FBgn0036919	-0.575725	6.90013	10.3111	0.00647287	0.444181	chr3L	19924942	19927175	+	protein_coding	Grasp65
FBgn0010638	-0.57703	8.27209	8.11476	0.0131739	0.546954	chr2R	14618770	14619681	+	protein_coding	Sec61beta
FBgn0037602	-0.577527	2.16189	4.96496	0.0432675	0.674646	chr3R	8651083	8651493	+	protein_coding	CG8021
FBgn0053977	-0.578991	4.1489	9.66645	0.00790924	0.456837	chr3R	13402558	13403051	-	protein_coding	CG33977
FBgn0037370	-0.579923	6.19955	6.36903	0.0248746	0.611123	chr3R	5736747	5738013	+	protein_coding	CG1236
FBgn0033162	-0.580004	5.35096	7.6333	0.0155714	0.585826	chr2R	7393545	7395932	-	protein_coding	CG1707
FBgn0031549	-0.581883	5.76147	8.90674	0.0101011	0.490959	chr2L	3527386	3530317	-	protein_coding	Spindly
FBgn0086447	-0.58303	3.58324	5.82203	0.0305491	0.648317	chr2L	19133022	19135233	-	protein_coding	l(2)37Cg
FBgn0035204	-0.584921	4.49712	6.92443	0.0200902	0.604067	chr3L	1304849	1307418	-	protein_coding	CG2277
FBgn0263106	-0.585302	7.45983	13.9881	0.00229417	0.31369	chr3L	5750028	5752189	-	protein_coding	DnaJ-1
FBgn0031049	-0.585671	7.35833	15.2464	0.00166563	0.289573	chrX	19643326	19644518	+	protein_coding	Sec61gamma
FBgn0264834	-0.588873	3.38101	5.25135	0.038425	0.672599	chr2R	1348166	1349167	-	lincRNA	CR44042
FBgn0036696	-0.591291	3.43629	6.74129	0.0214955	0.607782	chr3L	17044400	17045038	-	protein_coding	CG14057
FBgn0045842	-0.600514	4.4966	4.97228	0.0431351	0.674646	chr2L	15257266	15264692	-	protein_coding	yuri
FBgn0085279	-0.603918	2.80469	4.51354	0.0524469	0.680312	chr3L	17476221	17477103	+	protein_coding	CG34250
FBgn0037930	-0.608334	5.3013	6.40616	0.0243755	0.607782	chr3R	11674220	11674923	+	protein_coding	CG14715
FBgn0052638	-0.60933	5.50036	9.29118	0.00891448	0.477314	chrX	13122875	13128794	-	protein_coding	CG32638
FBgn0260942	-0.610036	3.79066	4.84785	0.0454528	0.674646	chr3R	22550679	22556494	+	protein_coding	bond
FBgn0260441	-0.615035	10.3611	9.55499	0.00819343	0.468627	chr3L	13023351	13024762	+	protein_coding	RpS12
FBgn0261791	-0.615929	6.31067	11.0158	0.00523572	0.41241	chrX	16639809	16640419	-	protein_coding	SmG
FBgn0039356	-0.616901	2.58881	7.88306	0.0142696	0.565717	chr3R	25678682	25679529	+	protein_coding	CG5039
FBgn0011758	-0.616914	4.09558	4.64453	0.0495645	0.676845	chrX	17397477	17403278	+	protein_coding	B-H1
FBgn0030941	-0.620862	5.02991	5.27537	0.0381321	0.670903	chrX	18624041	18634908	-	protein_coding	wgn
FBgn0024841	-0.621402	5.42408	6.59247	0.0227224	0.607782	chr3R	29723162	29724226	+	protein_coding	Pcd
FBgn0037890	-0.623536	5.74212	13.9682	0.00230615	0.31369	chr3R	11242207	11243999	-	protein_coding	CG17734
FBgn0035452	-0.623929	5.72794	5.58128	0.0343402	0.656126	chr3L	3612191	3615244	+	protein_coding	CG10359
FBgn0260008	-0.624036	6.53175	10.763	0.00564525	0.430978	chr3L	25120708	25126171	+	protein_coding	Ucrh
FBgn0038829	-0.624621	6.97755	11.6584	0.00434058	0.392867	chr3R	20819128	20821848	-	protein_coding	CG17271
FBgn0026879	-0.62811	6.79083	6.41744	0.0247374	0.610377	chrX	624756	625203	-	protein_coding	CG13364
FBgn0002629	-0.62873	5.57886	5.5615	0.0345203	0.656168	chr3R	26023820	26024579	-	protein_coding	E(spl)m4-BFM
FBgn0040534	-0.629233	5.11345	8.41483	0.0118968	0.52888	chr3R	9014971	9015341	-	protein_coding	CG11985
FBgn0031378	-0.630137	2.62214	5.38061	0.03645	0.665643	chr2L	1981175	1982099	+	protein_coding	CG15362
FBgn0086254	-0.630427	7.16432	17.7199	0.000925694	0.232204	chr3L	11620534	11624381	-	protein_coding	CG6084
FBgn0040251	-0.638548	4.50539	7.21189	0.0180947	0.601717	chr3R	11151025	11153849	-	protein_coding	Ugt86Di
FBgn0001218	-0.638761	10.5515	8.77018	0.010566	0.505527	chrX	11801695	11807117	-	protein_coding	Hsc70-3
FBgn0021795	-0.640019	8.12699	14.4421	0.00204023	0.306191	chr2R	11370299	11371335	-	protein_coding	Tapdelta
FBgn0029804	-0.642093	4.53194	4.58919	0.0511031	0.680312	chrX	5765854	5770780	-	protein_coding	CG3097
FBgn0263260	-0.644854	5.62544	6.53506	0.0234483	0.607782	chr2R	10050861	10052167	-	protein_coding	sel
FBgn0087007	-0.645201	7.19141	4.65704	0.0510761	0.680312	chr3L	14412827	14536276	-	protein_coding	bbg
FBgn0027095	-0.645845	6.73766	9.86828	0.00742318	0.451016	chr3R	16349403	16350801	+	protein_coding	Manf
FBgn0004885	-0.648184	7.05727	15.5078	0.00156143	0.289573	chr3R	24719696	24749125	+	protein_coding	tok
FBgn0010504	-0.649576	4.06999	6.93719	0.0199964	0.604067	chr2R	8146917	8156654	-	protein_coding	kermit
FBgn0031322	-0.651635	4.82085	7.74056	0.0149961	0.574887	chr2L	1185756	1196807	+	protein_coding	CG5001
FBgn0035904	-0.654273	6.67743	4.9408	0.0456087	0.674678	chr3L	8518884	8520295	+	protein_coding	GstO3
FBgn0037203	-0.655388	2.64435	4.4548	0.0538039	0.686586	chr3L	22881044	22893821	+	protein_coding	slif
FBgn0038115	-0.657162	3.82307	6.55987	0.023002	0.607782	chr3R	13049397	13051453	-	protein_coding	CG7966
FBgn0035998	-0.66481	2.31843	5.48526	0.0349381	0.657532	chr3L	9456341	9457669	-	protein_coding	CG3437
FBgn0040340	-0.665702	7.79177	5.11652	0.0419996	0.674646	chrX	935231	937822	+	protein_coding	TRAM
FBgn0030884	-0.667213	3.90549	4.73485	0.0476858	0.676845	chrX	17911461	17924163	+	protein_coding	CG6847
FBgn0040899	-0.669151	4.30388	7.59321	0.0157929	0.585826	chrX	2184724	2185258	+	protein_coding	CG17776
FBgn0031824	-0.671406	4.24993	7.54168	0.0160832	0.585826	chr2L	6492973	6494532	-	protein_coding	CG9547
FBgn0035346	-0.673886	5.49978	6.14439	0.0275293	0.641711	chr3L	2488803	2492613	+	protein_coding	CG1146
FBgn0038396	-0.683129	4.1568	12.2767	0.00364227	0.359295	chr3R	16049669	16050693	+	protein_coding	CG5013
FBgn0032713	-0.684504	4.76007	12.4676	0.00345348	0.356478	chr2L	18823547	18826716	+	protein_coding	CG17323
FBgn0038463	-0.684629	5.05971	11.3461	0.00475155	0.401753	chr3R	16996445	16999449	+	protein_coding	CG3534
FBgn0030480	-0.686522	4.55768	13.6074	0.00253557	0.318015	chrX	13385209	13385893	+	protein_coding	Tim9a
FBgn0037838	-0.689647	3.6064	5.07761	0.0412814	0.674646	chr3R	10815287	10817490	+	protein_coding	CG4089
FBgn0039218	-0.689827	4.59012	10.1185	0.00686778	0.445939	chr3R	24717510	24717998	+	protein_coding	Rpb10
FBgn0039328	-0.691154	4.00229	10.0288	0.00706121	0.445939	chr3R	25329529	25331203	-	protein_coding	CHKov2
FBgn0063127	-0.692494	8.80759	7.2719	0.0178691	0.59993	chr3R	6699559	6700164	-	lincRNA	pncr002:3R
FBgn0044030	-0.693266	4.71344	7.56296	0.0159626	0.585826	chrX	19479381	19480238	-	protein_coding	mRpS14
FBgn0053774	-0.700836	2.95197	5.16936	0.039743	0.674646	chr2R	9399752	9400329	-	protein_coding	CG33774
FBgn0001229	-0.705211	6.80084	4.68896	0.0513248	0.680312	chr3L	9371510	9372497	-	protein_coding	Hsp67Bc
FBgn0039023	-0.710524	1.49488	4.53592	0.0519408	0.680312	chr3R	22761439	22763711	-	protein_coding	CG4723
FBgn0040575	-0.713941	2.82777	4.50792	0.0525749	0.680312	chr3R	20559707	20560280	-	protein_coding	CG15922
FBgn0037875	-0.722784	6.32074	13.7691	0.00242962	0.31369	chr3R	11212307	11214539	-	protein_coding	ZnT86D
FBgn0011695	-0.72283	3.99347	6.69789	0.0218451	0.607782	chr2R	24026171	24027518	+	protein_coding	PebIII
FBgn0047135	-0.723565	7.78778	14.645	0.0019373	0.301953	chr3L	3197862	3199047	-	protein_coding	CG32276
FBgn0263911	-0.723928	6.92033	7.59764	0.0163384	0.585826	chr3L	21538858	21539447	-	protein_coding	CoVIII
FBgn0040007	-0.72602	9.56685	7.67079	0.0156132	0.585826	chr2R	4515387	4516458	-	protein_coding	RpL38
FBgn0050338	-0.727947	1.95371	6.6159	0.022524	0.607782	chr2R	9594044	9599505	+	protein_coding	CG30338
FBgn0040751	-0.737121	2.63678	5.74982	0.031433	0.65189	chr2R	14157049	14157488	-	protein_coding	CG13018
FBgn0030114	-0.737492	7.28952	10.5992	0.00593021	0.439361	chrX	9250419	9255953	+	protein_coding	CG17754
FBgn0037696	-0.738578	3.50334	4.80445	0.0462956	0.676845	chr3R	9455516	9456546	-	protein_coding	GstZ1
FBgn0011204	-0.739717	5.91571	10.7363	0.00569055	0.432556	chr3L	1503225	1517271	-	protein_coding	cue
FBgn0261505	-0.740775	1.95462	5.50196	0.0347037	0.656168	chr2R	1207415	1209312	+	pseudogene	CR42653
FBgn0031263	-0.741745	3.36753	5.20365	0.0391853	0.674646	chr2L	559611	560523	+	protein_coding	CG2789
FBgn0039714	-0.741754	5.26939	10.1154	0.00687433	0.445939	chr3R	29863700	29868895	-	protein_coding	Zip99C
FBgn0000489	-0.742535	3.80525	4.83376	0.0457243	0.675343	chr3L	15925804	15954797	-	protein_coding	Pka-C3
FBgn0085220	-0.755948	5.32653	19.1258	0.000677548	0.217088	chr2R	16951836	16952581	+	protein_coding	CG34191
FBgn0002734	-0.76135	4.43187	5.64638	0.0333747	0.65189	chr3R	25997620	25998633	+	protein_coding	E(spl)mdelta-HLH
FBgn0036000	-0.761461	5.31713	21.7214	0.000394692	0.157509	chr3L	9459368	9460799	-	protein_coding	CG3434
FBgn0010470	-0.763064	7.51343	9.32956	0.00891613	0.477314	chr2R	21487166	21497929	-	protein_coding	Fkbp14
FBgn0032161	-0.767413	3.44297	12.4824	0.00343933	0.356478	chr2L	9920159	9921459	+	protein_coding	CG4594
FBgn0040773	-0.769482	7.02079	11.4789	0.00457159	0.400122	chr2R	10048352	10050066	+	protein_coding	CoVIIc
FBgn0038830	-0.778051	5.45894	33.0993	5.56e-05	0.0464959	chr3R	20823312	20824239	-	protein_coding	CG17272
FBgn0035271	-0.778175	4.29955	8.96234	0.00991868	0.490354	chr3L	1777009	1777411	-	protein_coding	CG2021
FBgn0023170	-0.783705	7.82505	8.06061	0.0139734	0.560215	chr2R	24061852	24062431	-	protein_coding	RpL39
FBgn0035767	-0.787771	5.17504	7.44325	0.0171234	0.59421	chr3L	7341883	7345183	-	protein_coding	CG8596
FBgn0030048	-0.790013	4.24988	15.2864	0.00164919	0.289573	chrX	8558878	8560192	-	protein_coding	CG12112
FBgn0028468	-0.791072	4.88176	14.9031	0.00181488	0.295582	chr3R	21108445	21110834	+	protein_coding	rtet
FBgn0050344	-0.794175	5.3869	10.7021	0.00574926	0.435135	chr2R	9145259	9148512	+	protein_coding	CG30344
FBgn0032820	-0.797471	5.0581	5.09915	0.0429308	0.674646	chr2L	19761586	19764136	-	protein_coding	fbp
FBgn0050197	-0.802632	5.33723	5.04468	0.0442905	0.674646	chr2R	14514029	14514992	+	protein_coding	CG30197
FBgn0040907	-0.802916	4.0272	10.0743	0.00696236	0.445939	chrX	4321763	4322231	-	protein_coding	mRpL33
FBgn0036667	-0.802932	4.95519	7.17605	0.018876	0.603723	chr3L	16844567	16844991	-	protein_coding	CG9669
FBgn0083123	-0.808233	4.76764	10.3352	0.00642536	0.444181	chr2R	14621600	14624498	+	lincRNA	Uhg5
FBgn0014002	-0.815729	10.489	14.8025	0.00186149	0.299871	chr3L	15137737	15142840	-	protein_coding	Pdi
FBgn0030451	-0.815981	2.42388	5.70519	0.0319943	0.65189	chrX	13128951	13134565	+	protein_coding	CG15717
FBgn0010433	-0.820069	3.90356	5.0006	0.0431923	0.674646	chr3R	8278051	8279274	+	protein_coding	ato
FBgn0035868	-0.828337	2.77483	6.96679	0.0197806	0.604067	chr3L	8302363	8304059	-	protein_coding	CG7194
FBgn0050195	-0.82962	1.61645	4.92028	0.0440862	0.674646	chr2R	22646615	22647245	-	protein_coding	CG30195
FBgn0038461	-0.83006	4.68045	21.8247	0.000386629	0.157509	chr3R	16990333	16991878	-	protein_coding	CG3678
FBgn0034354	-0.83557	5.7048	5.36171	0.0396544	0.674646	chr2R	18503607	18505025	+	protein_coding	GstE11
FBgn0045761	-0.839157	5.45351	11.5501	0.00447833	0.398417	chr3R	25323155	25329316	-	protein_coding	CHKov1
FBgn0001142	-0.845525	7.53686	11.3958	0.00475908	0.401753	chr2L	132076	134472	+	protein_coding	Gs1
FBgn0034025	-0.855351	6.46155	6.16744	0.0293135	0.645816	chr2R	15511709	15515597	+	protein_coding	GalNAc-T1
FBgn0051676	-0.858029	6.02283	11.9115	0.00421703	0.38768	chr2L	20840749	20849182	+	protein_coding	CG31676
FBgn0052280	-0.861904	5.77588	22.9397	0.000310687	0.136384	chr3L	3165180	3169080	+	protein_coding	CG32280
FBgn0031117	-0.862025	4.47191	14.588	0.00196556	0.301953	chrX	20467454	20469796	+	protein_coding	GstT3
FBgn0002868	-0.866584	7.41664	4.65173	0.0533606	0.683412	chr3R	9783406	9784370	-	protein_coding	MtnA
FBgn0039024	-0.871383	3.87416	5.9488	0.0292693	0.64571	chr3R	22763959	22766172	-	protein_coding	CG4721
FBgn0035427	-0.883465	2.40403	5.35279	0.0368648	0.666703	chr3L	3257877	3268184	+	protein_coding	ckd
FBgn0034137	-0.886341	0.445287	4.65656	0.0493092	0.676845	chr2R	16566022	16570120	+	protein_coding	CG4945
FBgn0030816	-0.889476	4.91076	5.23323	0.0413348	0.674646	chrX	17091853	17098488	+	protein_coding	CG16700
FBgn0085732	-0.89862	4.62921	18.8468	0.000719994	0.217972	chr2R	1211066	1213666	+	pseudogene	CR40190
FBgn0052069	-0.900305	3.89027	13.2896	0.00275965	0.319695	chr3L	11062130	11062614	-	protein_coding	CG32069
FBgn0085229	-0.902832	4.10521	9.25611	0.00901578	0.478272	chr2R	5757661	5758067	+	protein_coding	CG34200
FBgn0037845	-0.90386	0.336554	4.43957	0.0541623	0.686661	chr3R	10858201	10859813	-	protein_coding	CG14694
FBgn0039099	-0.904072	4.59415	11.9666	0.00397479	0.375233	chr3R	23678894	23679855	+	protein_coding	GILT2
FBgn0036931	-0.906241	1.45681	7.33212	0.0173292	0.594621	chr3L	20024686	20027835	-	protein_coding	CG14183
FBgn0000008	-0.907993	5.3296	8.04935	0.0144663	0.566996	chr2R	22136967	22172834	+	protein_coding	a
FBgn0033548	-0.909161	4.10092	9.92865	0.00728456	0.445939	chr2R	10810555	10810936	-	protein_coding	CG7637
FBgn0036249	-0.916519	4.5845	31.0312	7.63e-05	0.0535927	chr3L	12120018	12121185	+	protein_coding	CG11560
FBgn0033809	-0.919062	1.97394	5.10276	0.0408529	0.674646	chr2R	13215658	13219247	-	protein_coding	CG4630
FBgn0032727	-0.920082	4.28189	5.79238	0.0324008	0.65189	chr2L	18955480	18957311	-	protein_coding	CG10623
FBgn0038179	-0.92234	2.66284	8.17094	0.0129231	0.541875	chr3R	13765755	13767103	+	protein_coding	CG9312
FBgn0016726	-0.926293	9.48649	13.2805	0.00279408	0.320662	chr2R	21293767	21294404	+	protein_coding	RpL29
FBgn0040367	-0.936642	2.85488	5.76641	0.0312273	0.651596	chrX	1209969	1211853	+	protein_coding	CG11382
FBgn0026721	-0.938753	5.68616	5.03904	0.046001	0.676492	chr2R	17054001	17059299	+	protein_coding	fat-spondin
FBgn0051710	-0.950758	3.85763	8.43076	0.0118332	0.52888	chr2L	9702441	9705954	-	protein_coding	CG31710
FBgn0086704	-0.951994	1.67067	8.11098	0.0131909	0.546954	chr3R	31158155	31169106	-	protein_coding	stops
FBgn0031663	-0.954382	5.2482	17.1476	0.00105563	0.250484	chr2L	4978483	4979379	-	protein_coding	CG8891
FBgn0036152	-0.957117	3.33083	9.3582	0.00872458	0.47668	chr3L	11287935	11295919	-	protein_coding	CG6175
FBgn0037378	-0.957169	5.67579	15.9919	0.00138764	0.280065	chr3R	5793307	5794317	-	protein_coding	CG2046
FBgn0034245	-0.960108	4.36707	15.4479	0.00158462	0.289573	chr2R	17572095	17572784	-	protein_coding	CG14482
FBgn0033936	-0.962806	1.25607	7.79054	0.0147365	0.569953	chr2R	14420323	14424764	+	protein_coding	CG17386
FBgn0038412	-0.970734	1.93399	4.88517	0.0447424	0.674646	chr3R	16305757	16308700	+	protein_coding	Zip89B
FBgn0032400	-0.993252	9.17519	8.5709	0.0125117	0.5388	chr2L	12045342	12046118	-	protein_coding	CG6770
FBgn0260653	-0.993899	7.22433	5.97184	0.0321444	0.65189	chr3L	19700976	19708015	-	protein_coding	serp
FBgn0040786	-1.00157	2.57376	10.2328	0.00663014	0.444346	chr3L	19806810	19807199	-	protein_coding	CG14104
FBgn0051102	-1.00529	1.06356	5.90501	0.0295691	0.645879	chr3R	25293457	25295594	-	protein_coding	CG31102
FBgn0035449	-1.00578	5.21019	18.3841	0.000797333	0.225812	chr3L	3468022	3471309	-	protein_coding	CG14971
FBgn0003149	-1.0103	4.51578	4.95416	0.0468282	0.676845	chr3L	8732857	8745310	-	protein_coding	Prm
FBgn0035976	-1.01252	4.24659	8.54796	0.0118371	0.52888	chr3L	9338809	9348336	+	protein_coding	PGRP-LC
FBgn0038462	-1.01405	4.53959	37.434	3e-05	0.029219	chr3R	16994541	16996071	-	protein_coding	CG17556
FBgn0262945	-1.01864	2.75433	10.1201	0.00686446	0.445939	chrX	5831897	5832215	-	lincRNA	CR43264
FBgn0266737	-1.03309	0.730275	6.11231	0.0272774	0.639472	chr3L	19260039	19260895	+	lincRNA	CR45210
FBgn0038273	-1.03422	1.5908	5.56391	0.0338502	0.652443	chr3R	14894783	14896446	+	protein_coding	CG14860
FBgn0015801	-1.03507	5.26344	5.56744	0.0373269	0.666703	chr2R	24788007	24793410	-	protein_coding	Reg-5
FBgn0037835	-1.03638	4.87927	11.6126	0.00464616	0.400122	chr3R	10792903	10793643	+	protein_coding	CG14687
FBgn0038682	-1.04674	4.07711	5.00153	0.0453814	0.674646	chr3R	19148631	19153686	-	protein_coding	CG5835
FBgn0261274	-1.05367	5.34108	7.28275	0.0198058	0.604067	chr3L	4170403	4173789	+	protein_coding	Ero1L
FBgn0032235	-1.059	2.84675	4.65043	0.0498102	0.676845	chr2L	10382262	10384723	+	protein_coding	CG5096
FBgn0011227	-1.05998	4.10492	20.7569	0.000480022	0.183233	chr2R	12757132	12757529	-	protein_coding	ox
FBgn0034021	-1.07056	4.83912	14.301	0.00215759	0.31369	chr2R	15472174	15482834	-	protein_coding	CG8180
FBgn0053544	-1.08814	0.375979	5.8891	0.029754	0.646627	chr2R	16778364	16778994	+	protein_coding	Vkor
FBgn0014073	-1.08967	2.89622	10.3274	0.00644081	0.444181	chr3L	4510697	4532145	-	protein_coding	Tie
FBgn0040153	-1.09973	5.52385	6.65172	0.0252771	0.613587	chrX	14203960	14211457	-	protein_coding	l(1)G0469
FBgn0267435	-1.101	5.08019	5.78577	0.0344716	0.656168	chr3R	31204179	31210730	-	protein_coding	chp
FBgn0002567	-1.10319	4.20017	15.6374	0.00151256	0.289573	chr2R	9177863	9186342	-	protein_coding	ltd
FBgn0004403	-1.11216	10.1641	16.2162	0.00142246	0.28383	chrX	7933741	7934677	+	protein_coding	RpS14a
FBgn0035999	-1.11269	4.20203	50.2512	6.32e-06	0.0100952	chr3L	9456317	9459370	+	protein_coding	CG3552
FBgn0036836	-1.11753	1.01676	5.39205	0.036281	0.665643	chr3L	18985904	18988323	-	protein_coding	CG11619
FBgn0020445	-1.12093	4.86605	5.71832	0.0353674	0.661864	chr2L	3334874	3354829	-	protein_coding	E23
FBgn0036999	-1.12854	4.3804	12.388	0.00366957	0.359966	chr3L	20474465	20477003	+	protein_coding	isoQC
FBgn0033830	-1.13314	1.2728	8.54248	0.0113975	0.521546	chr2R	13375974	13377731	-	protein_coding	CG10814
FBgn0034856	-1.13488	2.74845	5.5775	0.0336662	0.65189	chr2R	23381196	23382591	+	protein_coding	yellow-d2
FBgn0004396	-1.13722	6.50828	5.83001	0.0350537	0.658297	chr3L	15535394	15553214	+	protein_coding	CrebA
FBgn0037999	-1.17649	4.44647	16.1873	0.00132387	0.272057	chr3R	12219880	12221464	-	protein_coding	CG4860
FBgn0030617	-1.17899	4.24043	4.91536	0.0481584	0.676845	chrX	15139936	15163225	-	protein_coding	CG9095
FBgn0066084	-1.18813	10.8612	11.1167	0.00603858	0.443646	chr2R	24903415	24903935	-	protein_coding	RpL41
FBgn0027578	-1.20565	4.15923	12.2605	0.00384007	0.370483	chr3R	28883692	28886015	+	protein_coding	CG14526
FBgn0039593	-1.20698	4.12244	13.8849	0.00237575	0.31369	chr3R	28670703	28672021	+	protein_coding	CG9989
FBgn0262624	-1.21226	4.11179	11.5987	0.00465831	0.400122	chr3L	1885656	1891462	+	protein_coding	Tmhs
FBgn0264443	-1.23896	4.39592	15.1056	0.00180349	0.295582	chr2L	19968683	20017282	-	protein_coding	CG43861
FBgn0086057	-1.23991	-1.26538	4.55946	0.0514144	0.680312	chr3R	11224307	11224400	+	snoRNA	snoRNA:Me28S-G2017
FBgn0039479	-1.24722	2.47474	4.79482	0.0472571	0.676845	chr3R	27075869	27082818	+	protein_coding	CG14257
FBgn0036364	-1.24798	2.42672	4.61363	0.0510393	0.680312	chr3L	13440909	13442420	+	protein_coding	CG14109
FBgn0015569	-1.24875	2.18375	9.80112	0.00758099	0.451236	chr3R	7486582	7493845	-	protein_coding	alpha-Est10
FBgn0051777	-1.24925	3.70615	9.37614	0.00904748	0.478508	chr2L	3706550	3707063	-	protein_coding	CG31777
FBgn0027556	-1.26711	5.22394	4.79185	0.0523068	0.680312	chrX	16913179	16938209	+	protein_coding	CG4928
FBgn0264272	-1.28636	2.46321	5.91426	0.0295701	0.645879	chr3L	1200785	1232700	+	protein_coding	mwh
FBgn0050438	-1.29349	1.49804	6.75481	0.021388	0.607782	chr2R	5496673	5549543	+	protein_coding	CG30438
FBgn0051076	-1.29547	3.48976	6.59056	0.0241939	0.607782	chr3R	26989034	26989852	-	protein_coding	CG31076
FBgn0264706	-1.29994	-0.603734	8.48148	0.011633	0.526188	chr3R	21216819	21217242	+	pseudogene	CR43975
FBgn0266709	-1.30642	1.54277	9.47366	0.00840828	0.468716	chr3L	13024762	13026437	-	protein_coding	Zmynd10
FBgn0039223	-1.30796	3.98945	31.4773	7.12e-05	0.0520771	chr3R	24784551	24787421	-	protein_coding	CG5805
FBgn0029831	-1.32258	2.69426	7.37583	0.0170602	0.59421	chrX	5988790	5992640	+	protein_coding	CG5966
FBgn0025456	-1.32336	5.36941	9.72646	0.00945031	0.485199	chr3R	17393271	17394640	-	protein_coding	CREG
FBgn0022981	-1.33692	1.3761	8.92488	0.0100412	0.490959	chr3R	4645980	4648884	+	protein_coding	rpk
FBgn0050380	-1.33933	0.130354	5.19153	0.0393814	0.674646	chr2R	7939200	7939659	-	protein_coding	CG30380
FBgn0031097	-1.33934	6.73016	7.78293	0.0181453	0.601717	chrX	20239854	20243209	+	protein_coding	obst-A
FBgn0046875	-1.34237	2.37561	7.11527	0.0187385	0.603142	chr3R	6111670	6112302	-	protein_coding	Obp83g
FBgn0263236	-1.34259	6.68112	11.078	0.00661407	0.444346	chr3R	29244960	29250451	-	protein_coding	SP1029
FBgn0034443	-1.34586	5.78151	11.1138	0.00646143	0.444181	chr2R	19396214	19396772	-	protein_coding	cer
FBgn0034622	-1.35093	-1.0887	5.30845	0.0375373	0.666703	chr2R	21341971	21345608	+	protein_coding	CG15666
FBgn0065098	-1.35808	0.745073	6.48226	0.0236838	0.607782	chr3R	23730047	23730429	-	lincRNA	RNaseMRP:RNA
FBgn0262362	-1.35914	0.880187	4.95896	0.0433764	0.674646	chr3R	8041223	8055970	+	protein_coding	CG43060
FBgn0033753	-1.3647	2.48313	5.0673	0.0425713	0.674646	chr2R	12566184	12569061	+	protein_coding	Cyp301a1
FBgn0034924	-1.38121	0.352595	7.13567	0.0186004	0.603142	chr2R	23895062	23896997	+	protein_coding	CG17658
FBgn0024294	-1.39543	7.22236	8.43249	0.0146865	0.569271	chr2R	7147691	7149289	+	protein_coding	Spn43Aa
FBgn0261987	-1.40284	-0.939802	5.71113	0.0319189	0.65189	chr3R	17719453	17722955	+	protein_coding	Pxt
FBgn0039758	-1.4056	2.29146	4.9702	0.0442096	0.674646	chr3R	30241267	30243312	-	protein_coding	CG9737
FBgn0033942	-1.42037	4.03358	27.2933	0.00014078	0.0749079	chr2R	14512558	14515211	-	protein_coding	Cpr51A
FBgn0000075	-1.42671	1.75133	6.49075	0.0236081	0.607782	chr2L	19110153	19114110	+	protein_coding	amd
FBgn0053169	-1.44346	2.74459	8.97539	0.00987639	0.490354	chr3L	22863863	22864496	+	protein_coding	CG33169
FBgn0036436	-1.46283	5.66011	5.38292	0.0425672	0.674646	chr3L	14674537	14678147	-	protein_coding	CG4914
FBgn0034094	-1.47977	3.52776	4.92044	0.0480614	0.676845	chr2R	16226500	16229869	+	protein_coding	Tsf3
FBgn0266974	-1.48189	-0.899045	4.51029	0.0525209	0.680312	chr3L	2503788	2504397	+	lincRNA	CR45425
FBgn0033668	-1.48813	3.70998	11.3479	0.00518221	0.41241	chr2R	11939556	11967435	+	protein_coding	CG13188
FBgn0030586	-1.49552	1.94434	5.42724	0.0363262	0.665643	chrX	14842616	14844757	-	protein_coding	CG12539
FBgn0265819	-1.5014	-0.626107	5.33867	0.0370774	0.666703	chr2L	4228920	4229458	+	lincRNA	CR44608
FBgn0038073	-1.50738	-0.0851916	4.76531	0.0470713	0.676845	chr3R	12662830	12673959	+	protein_coding	CG14395
FBgn0086661	-1.5085	-1.51856	4.69958	0.0484093	0.676845	chr3L	18896188	18896456	-	snoRNA	snoRNA:Psi28S-2566
FBgn0063492	-1.50874	1.77186	15.1565	0.0017033	0.293217	chr2R	18407833	18408955	+	protein_coding	GstE8
FBgn0037410	-1.51122	-0.103645	9.28114	0.00894335	0.477314	chr3R	6209372	6213493	+	protein_coding	Osi2
FBgn0051100	-1.51615	2.38433	6.31502	0.025948	0.620737	chr3R	8995228	9003650	-	protein_coding	CG31100
FBgn0036380	-1.5263	-0.774546	9.71224	0.00779583	0.454774	chr3L	13840196	13842240	-	protein_coding	CG8757
FBgn0040600	-1.52987	3.86689	7.3311	0.0197742	0.604067	chr3R	24769350	24770933	+	protein_coding	CG13631
FBgn0001255	-1.53538	5.93609	5.50758	0.0409168	0.674646	chr3R	8028452	8029546	-	protein_coding	ImpE3
FBgn0036806	-1.54384	1.93877	14.031	0.00226866	0.31369	chr3L	18684258	18686319	-	protein_coding	Cyp12c1
FBgn0035985	-1.54853	2.23956	4.81298	0.0479083	0.676845	chr3L	9404796	9406174	+	protein_coding	Cpr67B
FBgn0037807	-1.56572	2.21367	13.6955	0.00247718	0.317495	chr3R	10307805	10311613	-	protein_coding	CG6293
FBgn0085223	-1.56903	-0.177691	6.99592	0.019571	0.604067	chr2R	17544189	17545045	+	protein_coding	CG34194
FBgn0053926	-1.57075	0.18579	7.31411	0.0174414	0.595741	chr3L	9443231	9446388	+	protein_coding	CG33926
FBgn0024366	-1.57402	2.42138	6.17937	0.0276533	0.643065	chrX	1329517	1341587	-	protein_coding	CG11409
FBgn0031735	-1.58806	1.76849	13.9563	0.00231333	0.31369	chr2L	5746156	5747961	+	protein_coding	CG11029
FBgn0037409	-1.59774	2.44982	5.01039	0.0446635	0.674646	chr3R	6198810	6207678	+	protein_coding	Osi24
FBgn0034199	-1.59859	1.11623	9.92949	0.00728266	0.445939	chr2R	17136450	17136903	+	protein_coding	Gbp
FBgn0035358	-1.59875	-0.764018	8.30482	0.0123475	0.5344	chr3L	2642183	2643424	-	protein_coding	CG14949
FBgn0033658	-1.60474	-0.178945	5.04038	0.0419257	0.674646	chr2R	11862536	11863252	-	protein_coding	TwdlBeta
FBgn0030207	-1.61648	-1.28487	6.20575	0.0263129	0.625207	chrX	10477259	10478493	-	protein_coding	CG2887
FBgn0032680	-1.62021	-1.72215	4.83344	0.0457305	0.675343	chr2L	18454648	18455419	+	protein_coding	Ntf-2r
FBgn0033365	-1.62456	2.8832	6.25156	0.0278336	0.643065	chr2R	9019031	9031045	-	protein_coding	CG8170
FBgn0083977	-1.63823	0.281697	13.9983	0.0022881	0.31369	chr2R	9260277	9263971	-	protein_coding	CG34141
FBgn0034861	-1.64221	1.65713	8.16599	0.012945	0.541875	chr2R	23421520	23433354	-	protein_coding	CG9815
FBgn0054057	-1.66064	1.12432	18.0309	0.000862841	0.229894	chr3L	897379	898772	+	protein_coding	CG34057
FBgn0031554	-1.66701	-1.40705	4.53018	0.05207	0.680312	chr2L	3621109	3621681	-	protein_coding	CG15418
FBgn0037448	-1.66884	2.09474	8.9536	0.00994709	0.490354	chr3R	6478310	6495025	+	protein_coding	CG15186
FBgn0264776	-1.69331	-0.286248	5.20401	0.0391795	0.674646	chr3R	15507939	15508886	-	protein_coding	CG44014
FBgn0037665	-1.71641	4.83286	4.83051	0.052731	0.680312	chr3R	9251842	9253514	+	protein_coding	St2
FBgn0036605	-1.74177	2.01851	7.27239	0.0181826	0.601717	chr3L	16318953	16319526	-	protein_coding	CG13041
FBgn0085222	-1.74184	1.09885	12.3121	0.0036064	0.359295	chr2R	17508994	17511394	+	protein_coding	CG34193
FBgn0032519	-1.7503	1.38178	19.7421	0.000593571	0.217088	chr2L	13395359	13396184	-	protein_coding	CG16957
FBgn0034479	-1.75035	1.95166	9.94071	0.00725724	0.445939	chr2R	19979241	19984895	+	protein_coding	CG8654
FBgn0030594	-1.79543	2.40089	10.2222	0.00678393	0.445939	chrX	14906333	14909708	-	protein_coding	CG9509
FBgn0030587	-1.79557	0.322072	9.76055	0.00767819	0.452961	chrX	14846471	14848808	-	protein_coding	CG9522
FBgn0028939	-1.80296	4.55005	6.8069	0.0255728	0.615114	chr2L	13980125	13983269	+	protein_coding	NimC2
FBgn0052055	-1.80481	1.28244	17.2847	0.00102268	0.246151	chr3L	10218503	10220164	-	protein_coding	CG32055
FBgn0031426	-1.81279	0.154688	6.19206	0.0264517	0.626809	chr2L	2410623	2415322	-	protein_coding	CG18641
FBgn0033252	-1.81762	1.18346	6.5433	0.0231807	0.607782	chr2R	8052079	8065554	-	protein_coding	CG12769
FBgn0034999	-1.83233	3.81147	8.46022	0.014056	0.562209	chr2R	24294096	24298111	+	protein_coding	CG3394
FBgn0001225	-1.8339	7.74234	17.0845	0.00163912	0.289573	chr3L	9376417	9377427	-	protein_coding	Hsp26
FBgn0032803	-1.83406	4.88693	6.30665	0.0307255	0.648675	chr2L	19538424	19539740	+	protein_coding	CG13082
FBgn0035484	-1.84758	3.07089	6.79339	0.0236404	0.607782	chr3L	4022699	4026011	-	protein_coding	CG11594
FBgn0259164	-1.85301	-0.415642	5.05586	0.0416564	0.674646	chr3L	6066295	6071545	+	protein_coding	CG42269
FBgn0028938	-1.86254	0.257022	8.86136	0.0102529	0.494591	chr2L	13920706	13923553	-	protein_coding	CG16886
FBgn0034490	-1.86649	1.24671	7.04055	0.0192983	0.604067	chr2R	20248129	20254670	-	protein_coding	CG9864
FBgn0033137	-1.87888	3.84805	8.22386	0.0153085	0.583686	chr2R	7054404	7057548	-	protein_coding	Tsp42Ep
FBgn0039804	-1.88331	4.75672	4.89794	0.0517519	0.680312	chr3R	30827818	30842034	+	protein_coding	CG15544
FBgn0266973	-1.89319	-0.254794	14.5641	0.00197759	0.301953	chr3L	3244905	3245340	+	lincRNA	CR45424
FBgn0083012	-1.91962	-2.26625	4.91157	0.044248	0.674646	chrX	17146611	17146759	-	snoRNA	snoRNA:Psi28S-1135a
FBgn0039527	-1.92079	4.20987	4.79922	0.0533032	0.683412	chr3R	27586473	27596130	-	protein_coding	CG5639
FBgn0039494	-1.92129	3.90238	16.3705	0.00158105	0.289573	chr3R	27157947	27159781	+	protein_coding	grass
FBgn0066365	-1.9601	2.10062	5.67691	0.0346489	0.656168	chr3L	4294003	4307718	-	protein_coding	dyl
FBgn0259236	-1.96936	2.33284	13.2868	0.00276173	0.319695	chr3L	15613183	15647762	-	protein_coding	comm3
FBgn0037416	-1.97043	1.4015	5.78611	0.0322126	0.65189	chr3R	6260210	6262105	+	protein_coding	Osi9
FBgn0085282	-1.98231	1.62558	11.9362	0.00400931	0.376468	chr3L	18086673	18087320	-	protein_coding	CG34253
FBgn0033133	-2.01333	3.76593	23.4939	0.000318939	0.136592	chr2R	7042655	7044710	+	protein_coding	Tsp42Ek
FBgn0038986	-2.02208	-1.01891	8.30271	0.0123564	0.5344	chr3R	22558341	22562572	-	protein_coding	CG5278
FBgn0037801	-2.03105	3.25109	7.02021	0.0224874	0.607782	chr3R	10251517	10255268	+	protein_coding	CG3999
FBgn0029681	-2.05914	1.01557	5.93789	0.0300274	0.647729	chrX	3884167	3890486	+	protein_coding	CG15239
FBgn0033307	-2.07341	-1.25334	8.14535	0.0130366	0.54373	chr2R	8590496	8591948	+	protein_coding	CG14752
FBgn0034943	-2.08389	0.180331	9.80123	0.00758071	0.451236	chr2R	23962955	23964641	+	protein_coding	Fmo-1
FBgn0265811	-2.09165	-1.96366	5.88583	0.0297922	0.646627	chr2L	13398857	13399831	-	lincRNA	CR44600
FBgn0036410	-2.09491	3.575	6.43205	0.0284309	0.64571	chr3L	14083614	14085964	+	protein_coding	CG8100
FBgn0039217	-2.09972	0.378853	4.70748	0.0494072	0.676845	chr3R	24712779	24717430	+	protein_coding	CG13627
FBgn0051559	-2.10318	1.8567	7.04339	0.0205793	0.607782	chr3R	6150115	6157235	-	protein_coding	CG31559
FBgn0000448	-2.10845	4.20416	4.80053	0.053694	0.685682	chr2R	10203994	10237348	-	protein_coding	Hr46
FBgn0037975	-2.12304	3.12293	22.4445	0.00034294	0.143374	chr3R	11983097	11984541	-	protein_coding	CG3397
FBgn0038642	-2.12673	-1.08701	4.7152	0.0480873	0.676845	chr3R	18687555	18692719	-	protein_coding	Muc91C
FBgn0037721	-2.13035	4.83929	10.0382	0.00971997	0.487877	chr3R	9625156	9626930	-	protein_coding	CG9427
FBgn0039795	-2.15908	6.03028	4.84583	0.0538648	0.686661	chr3R	30690641	30692768	+	protein_coding	Spn100A
FBgn0038511	-2.16687	3.99333	6.19621	0.0317724	0.65189	chr3R	17425767	17446499	+	protein_coding	CG5873
FBgn0021738	-2.18299	-0.421208	6.45514	0.0239277	0.607782	chrX	3793222	3797339	+	protein_coding	Crg-1
FBgn0259233	-2.18913	0.0695484	12.8622	0.003098	0.337875	chr3R	24772180	24784562	+	protein_coding	CG42331
FBgn0046253	-2.21732	2.19048	7.34909	0.0190241	0.604067	chr2R	23343404	23347641	-	protein_coding	CG3502
FBgn0036939	-2.25101	-1.21328	5.04406	0.0418615	0.674646	chr3L	20124297	20127381	-	protein_coding	CG7365
FBgn0030590	-2.25892	1.81178	8.77931	0.0112859	0.520127	chrX	14862988	14871181	-	protein_coding	CG9518
FBgn0040350	-2.26324	-1.88925	4.47512	0.0533296	0.683412	chrX	948584	951900	-	protein_coding	CG3690
FBgn0039264	-2.31582	-0.321143	4.57166	0.0519829	0.680312	chr3R	25046322	25047409	+	protein_coding	CG11786
FBgn0267005	-2.3456	-1.47484	5.26117	0.0382706	0.672331	chr2L	3854287	3854994	-	lincRNA	CR45449
FBgn0266912	-2.34727	-1.361	8.80852	0.010433	0.500529	chr2L	3475364	3476058	+	lincRNA	CR45372
FBgn0030398	-2.34807	1.83505	10.5184	0.00648058	0.444181	chrX	12553123	12554235	+	protein_coding	Cpr11B
FBgn0054007	-2.35925	-0.893159	11.539	0.00449266	0.398417	chr2L	20495029	20495758	+	protein_coding	CG34007
FBgn0039686	-2.37351	2.28122	9.39682	0.00972475	0.487877	chr3R	29718662	29722388	+	protein_coding	CG15506
FBgn0002565	-2.42642	6.3577	6.59912	0.0291021	0.64571	chr3L	12129392	12131869	+	protein_coding	Lsp2
FBgn0266072	-2.43194	0.647668	14.6466	0.00193648	0.301953	chr2L	7795848	7796260	+	lincRNA	CR44825
FBgn0263343	-2.49086	-1.56896	4.68081	0.0487994	0.676845	chr3R	4984497	4986120	-	lincRNA	CR43424
FBgn0053514	-2.49452	1.71003	7.90132	0.0156294	0.585826	chr3L	4365433	4366671	+	protein_coding	CG33514
FBgn0035430	-2.51542	4.48266	5.84203	0.0370949	0.666703	chr3L	3291458	3299000	+	protein_coding	CG12009
FBgn0032520	-2.51762	0.415467	28.8954	0.000107538	0.0675565	chr2L	13396391	13398664	-	protein_coding	CG10859
FBgn0265266	-2.5359	1.06111	7.72774	0.0160202	0.585826	chr3R	24859899	24860366	-	protein_coding	CG13639
FBgn0267185	-2.5737	0.806738	13.2819	0.00276532	0.319695	chrX	12912559	12913009	+	lincRNA	CR45625
FBgn0036617	-2.66999	0.11684	11.1038	0.00510145	0.41241	chr3L	16362602	16363750	+	protein_coding	Cpr72Ea
FBgn0033518	-2.67585	0.0425257	10.6405	0.00585676	0.439032	chr2R	10418717	10419761	+	protein_coding	Prx2540-2
FBgn0002577	-2.6824	3.38449	7.16658	0.0227246	0.607782	chrX	11754272	11769508	+	protein_coding	m
FBgn0030542	-2.69116	2.65969	6.23272	0.0304026	0.648317	chrX	14187252	14187841	+	protein_coding	CG12481
FBgn0046878	-2.72556	-1.02552	5.95158	0.0290352	0.64571	chr3R	6108133	6109733	+	protein_coding	Obp83cd
FBgn0038676	-2.72637	2.78595	7.49304	0.019729	0.604067	chr3R	19033537	19044693	+	protein_coding	CG6026
FBgn0031613	-2.73856	-2.24099	5.37681	0.0365063	0.665643	chr2L	4577718	4578218	-	protein_coding	HP6
FBgn0046876	-2.74269	1.62374	5.04962	0.0461287	0.676845	chr3R	6109641	6111034	-	protein_coding	Obp83ef
FBgn0037548	-2.75197	2.32643	23.38	0.000286569	0.132418	chr3R	8094123	8105083	+	protein_coding	CG7900
FBgn0034623	-2.77645	-1.76567	5.07016	0.0414094	0.674646	chr2R	21346874	21347883	-	protein_coding	CG9822
FBgn0027527	-2.78293	1.88522	6.92339	0.0229241	0.607782	chr3R	6234707	6237181	+	protein_coding	Osi6
FBgn0033439	-2.80723	2.03406	18.3992	0.000839879	0.229894	chr2R	9706266	9707580	+	protein_coding	CG1773
FBgn0264508	-2.81058	-1.40908	11.0552	0.00517509	0.41241	chr2R	11616194	11616694	+	lincRNA	CR43907
FBgn0035428	-2.81128	0.363803	4.86143	0.0481571	0.676845	chr3L	3271035	3276255	+	protein_coding	CG14960
FBgn0051636	-2.82279	1.00739	10.5825	0.00631139	0.444181	chr2L	6656458	6658152	-	protein_coding	CG31636
FBgn0019940	-2.8764	0.392481	7.19593	0.0192361	0.604067	chr3R	15483157	15484699	+	protein_coding	Rh6
FBgn0037664	-2.87654	4.76667	8.01433	0.0184668	0.603142	chr3R	9246648	9251431	+	protein_coding	CG8420
FBgn0037291	-2.88746	-1.49157	6.70811	0.0217622	0.607782	chr3R	4981998	4984232	-	protein_coding	CG14662
FBgn0260482	-2.90613	-1.183	7.44579	0.0166399	0.587888	chrX	14243685	14246514	+	protein_coding	CG32599
FBgn0036351	-2.92312	1.69628	8.98997	0.0113327	0.520917	chr3L	13380358	13381346	-	protein_coding	CG14107
FBgn0265923	-2.94137	-2.39185	5.41847	0.0358943	0.665643	chrX	21630935	21631433	+	lincRNA	CR44712
FBgn0038148	-2.98258	-2.80673	4.90518	0.0443671	0.674646	chr3R	13397834	13398583	+	protein_coding	CG14377
FBgn0262877	-3.00852	-2.81674	6.22413	0.0261279	0.621652	chr2L	6932120	6932954	+	protein_coding	CG43232
FBgn0267706	-3.02467	-2.4245	5.95429	0.0290045	0.64571	chr3R	19191980	19193028	+	lincRNA	CR46039
FBgn0262529	-3.03882	2.3421	5.75079	0.0364532	0.665643	chr3L	15648570	15649125	+	protein_coding	CG43083
FBgn0015574	-3.09054	-2.28039	4.92261	0.0440432	0.674646	chr3R	7524566	7528777	-	protein_coding	alpha-Est6
FBgn0260954	-3.11641	2.63837	5.93602	0.034556	0.656168	chr2L	14741160	14741840	-	protein_coding	CG42586
FBgn0036427	-3.12215	-2.47658	5.67365	0.032398	0.65189	chr3L	14519759	14521690	-	protein_coding	CG4613
FBgn0000120	-3.13114	-0.0928492	13.1839	0.00283916	0.322255	chr2L	18078268	18081307	+	protein_coding	Arr1
FBgn0021742	-3.15205	1.14416	5.38138	0.040493	0.674646	chrX	10964031	10967134	-	protein_coding	C901
FBgn0031775	-3.16056	2.46159	28.7982	0.00011755	0.0711743	chr2L	6067667	6068594	-	protein_coding	CG9150
FBgn0266261	-3.22357	5.33298	5.39565	0.0443367	0.674646	chr3R	12341673	12342373	+	protein_coding	CG44956
FBgn0032753	-3.23123	-0.952519	8.32752	0.012253	0.5344	chr2L	19071130	19074149	-	protein_coding	CG17572
FBgn0033721	-3.23605	-2.11318	5.37715	0.0365014	0.665643	chr2R	12375285	12375678	+	protein_coding	CG13159
FBgn0262530	-3.25401	2.67677	5.17119	0.0462018	0.676845	chr3L	15650851	15651392	+	protein_coding	CG43084
FBgn0033708	-3.26875	-0.602988	14.6285	0.00194542	0.301953	chr2R	12298746	12302240	-	protein_coding	CG8850
FBgn0263802	-3.27234	-0.877111	15.3368	0.00162871	0.289573	chr2R	10760777	10761668	+	lincRNA	CR43605
FBgn0051294	-3.28422	-3.12987	5.15888	0.0450082	0.674646	chr3R	15715504	15716585	-	protein_coding	CG31294
FBgn0085308	-3.3132	4.58771	5.882	0.0372185	0.666703	chr3R	17402361	17403288	-	protein_coding	CG34279
FBgn0267128	-3.31477	-2.73535	6.82861	0.0247502	0.610377	chr3R	29276375	29277108	-	lincRNA	CR45568
FBgn0263762	-3.31511	4.51067	5.89822	0.0369786	0.666703	chr3L	15050855	15051425	-	protein_coding	CG43679
FBgn0033827	-3.32051	0.688053	13.5054	0.00274961	0.319695	chr2R	13298994	13301547	+	protein_coding	CG17047
FBgn0266327	-3.32344	-2.34744	5.57917	0.0336437	0.65189	chr2L	8703474	8705450	+	lincRNA	CR44992
FBgn0043069	-3.36428	0.437169	19.2861	0.000654456	0.217088	chr3R	16988813	16990419	+	protein_coding	MESK4
FBgn0003374	-3.37909	7.66992	6.71602	0.0283479	0.64571	chrX	3250088	3251040	+	protein_coding	Sgs4
FBgn0262569	-3.42284	-2.57198	5.33274	0.0371672	0.666703	chr2R	18867847	18868167	-	protein_coding	CG43109
FBgn0038507	-3.44182	-2.44121	4.98265	0.0429482	0.674646	chr3R	17411107	17412680	+	protein_coding	CG5863
FBgn0028667	-3.45105	-3.09308	4.92492	0.0492596	0.676845	chr3L	11473290	11473972	+	protein_coding	Vha16-3
FBgn0267006	-3.46959	-1.47364	15.3068	0.00164086	0.289573	chr2L	3856477	3857172	-	lincRNA	CR45450
FBgn0267688	-3.48518	-3.14057	5.70754	0.0454116	0.674646	chr3R	14840748	14841360	-	lincRNA	CR46024
FBgn0044817	-3.48518	-3.14057	5.70754	0.0454116	0.674646	chrX	14000209	14000889	+	protein_coding	Ste12DOR
FBgn0262817	-3.49785	-3.13897	5.43244	0.0496433	0.676845	chr2R	11085585	11088300	+	protein_coding	CG43188
FBgn0033359	-3.5017	2.65613	6.95691	0.0244719	0.607782	chr2R	8969345	8985900	-	protein_coding	CG8213
FBgn0036877	-3.50189	1.19893	5.76672	0.0354784	0.66189	chr3L	19501009	19503870	-	protein_coding	CG9452
FBgn0052811	-3.50271	-3.13878	5.67668	0.0458626	0.676156	chrX	1297983	1298387	-	protein_coding	CG32811
FBgn0262316	-3.5169	-3.13702	7.4098	0.0273689	0.639908	chr2R	8444981	8445081	+	pre_miRNA	mir-986
FBgn0051810	-3.51844	0.824012	13.6076	0.00276745	0.319695	chr2L	16849017	16852368	-	protein_coding	CG31810
FBgn0033970	-3.52014	1.2697	5.18966	0.044351	0.674646	chr2R	14832831	14833951	+	protein_coding	CG10205
FBgn0033602	-3.52645	-0.143781	7.26513	0.0191682	0.604067	chr2R	11265125	11266856	+	protein_coding	Cpr47Ee
FBgn0004511	-3.54564	2.97688	8.82435	0.0137074	0.557384	chrX	11769768	11778784	-	protein_coding	dy
FBgn0004911	-3.54917	-2.54896	8.67972	0.0108876	0.513915	chr3L	3934717	3935992	+	lincRNA	Eip63F-2
FBgn0035255	-3.56803	-3.13142	5.5929	0.0471164	0.676845	chr3L	1668900	1670108	-	protein_coding	RabX5
FBgn0029716	-3.56913	-2.46854	6.32188	0.0251692	0.612964	chrX	4558071	4560317	+	protein_coding	CG3546
FBgn0010549	-3.59088	1.22646	41.9913	1.65e-05	0.018136	chr2R	9390164	9395281	+	protein_coding	l(2)03659
FBgn0030815	-3.59377	-1.41629	8.54033	0.0114058	0.521546	chrX	17080422	17087675	-	protein_coding	CG8945
FBgn0003916	-3.60438	-3.07817	4.9927	0.0479793	0.676845	chr2L	901490	901654	-	snRNA	snRNA:U1:21D
FBgn0031432	-3.62054	1.95112	14.7384	0.00242108	0.31369	chr2L	2562482	2564830	-	protein_coding	Cyp309a1
FBgn0038134	-3.6547	-3.05145	6.35989	0.0290563	0.64571	chr3R	13292051	13293198	-	protein_coding	wntD
FBgn0032025	-3.69902	3.32984	10.6189	0.00843524	0.468716	chr2L	8346619	8351112	+	protein_coding	CG7778
FBgn0038339	-3.70197	3.23325	7.49182	0.0211437	0.607782	chr3R	15421107	15434738	-	protein_coding	CG6118
FBgn0035031	-3.70234	-2.74058	5.15431	0.0450868	0.674646	chr2R	24597994	24599091	+	protein_coding	CG13587
FBgn0259949	-3.70778	-2.41855	6.14174	0.0269693	0.63479	chr2L	3387353	3387743	-	protein_coding	Sfp23F
FBgn0085336	-3.71855	-3.04392	5.47092	0.0400108	0.674646	chr3R	11897581	11898419	+	protein_coding	CG34307
FBgn0050376	-3.7213	-2.1527	6.30833	0.0252997	0.613587	chr2R	8263485	8264426	-	protein_coding	CG30376
FBgn0263842	-3.74531	-3.08917	6.15027	0.0395266	0.674646	chr2L	3765493	3765863	+	protein_coding	CG43703
FBgn0031619	-3.7644	3.30567	6.3717	0.0308508	0.648675	chr2L	4651402	4652892	+	protein_coding	CG3355
FBgn0039161	-3.76686	2.07032	10.9242	0.0069574	0.445939	chr3R	24172627	24184144	+	protein_coding	CG13606
FBgn0040682	-3.77369	-0.793974	7.61328	0.0163814	0.585826	chr3R	5224138	5225542	+	protein_coding	CG14664
FBgn0037427	-3.78226	0.895296	7.04238	0.0221931	0.607782	chr3R	6311771	6327308	+	protein_coding	Osi17
FBgn0000451	-3.80704	4.45143	8.57357	0.0159521	0.585826	chr3L	10190275	10201837	-	protein_coding	ect
FBgn0036956	-3.82164	1.60783	7.34071	0.0207596	0.607782	chr3L	20231668	20233255	+	protein_coding	CG13813
FBgn0040565	-3.82392	5.45464	6.16568	0.0340648	0.654425	chr3R	17596535	17598453	+	protein_coding	CG7606
FBgn0250833	-3.83485	-1.48652	8.42914	0.0118396	0.52888	chr3L	8325858	8328307	+	protein_coding	CG34461
FBgn0036601	-3.84936	-1.53212	14.3708	0.00207785	0.309194	chr3L	16306599	16307205	+	protein_coding	CG13063
FBgn0030493	-3.91296	5.49207	5.59337	0.0415078	0.674646	chrX	13534399	13536202	+	protein_coding	CG15756
FBgn0266946	-3.92429	-2.99826	7.14271	0.0222925	0.607782	chr3L	15143800	15144170	+	lincRNA	CR45397
FBgn0051207	-3.92827	-1.42337	11.5636	0.00446079	0.398417	chr3R	21046031	21047027	-	protein_coding	CG31207
FBgn0035434	-3.97121	3.23955	13.714	0.00386282	0.370613	chr3L	3316780	3317144	+	protein_coding	Drsl5
FBgn0028537	-3.97281	0.361343	10.9108	0.00608681	0.444181	chr2L	14737089	14737769	-	protein_coding	CG31775
FBgn0036343	-3.97443	-2.79958	5.06273	0.046699	0.676845	chr3L	13060521	13061394	-	protein_coding	CG14115
FBgn0039752	-3.98867	0.4624	15.3241	0.00175915	0.295582	chr3R	30177876	30180178	+	protein_coding	CG15530
FBgn0003270	-4.01438	-1.71473	4.92101	0.0450104	0.674646	chr2L	18596135	18596921	-	protein_coding	amos
FBgn0035982	-4.01933	-2.93778	5.18443	0.0445714	0.674646	chr3L	9375429	9376293	+	protein_coding	CG4461
FBgn0051827	-4.02145	-2.98503	7.15021	0.0222375	0.607782	chr2L	15705170	15706220	+	protein_coding	CG31827
FBgn0063083	-4.02987	-0.714015	11.4414	0.00465085	0.400122	chr3L	7406322	7406617	+	lincRNA	pncr015:3L
FBgn0034860	-4.05604	5.30217	52.6506	1.78e-05	0.0183907	chr2R	23412319	23419684	-	protein_coding	CG9812
FBgn0263872	-4.06496	-2.80701	6.01089	0.0328602	0.65189	chr2L	308536	309348	-	lincRNA	CR43719
FBgn0039739	-4.06596	-2.86987	5.85793	0.0347161	0.656168	chr3R	30022344	30022648	-	protein_coding	RpS28a
FBgn0052726	-4.08371	-0.733423	4.78878	0.0497739	0.676845	chrX	7425219	7425743	-	protein_coding	CG32726
FBgn0038756	-4.11062	-1.68032	11.6935	0.00429707	0.390944	chr3R	19948442	19948907	+	protein_coding	CG4783
FBgn0266926	-4.12301	-2.82177	6.93173	0.0239088	0.607782	chr2R	11704754	11706222	-	lincRNA	CR45377
FBgn0051437	-4.14445	-1.12912	7.285	0.0229931	0.607782	chr3R	25383699	25384623	+	protein_coding	CG31437
FBgn0034819	-4.1867	2.76463	10.4675	0.00864844	0.476044	chr2R	23085880	23086268	-	protein_coding	CG9877
FBgn0034470	-4.19449	5.91275	5.57085	0.0418925	0.674646	chr2R	19702923	19703915	-	protein_coding	Obp56d
FBgn0261633	-4.21266	-0.182382	5.09539	0.0451515	0.674646	chr3L	16033777	16034170	+	protein_coding	CG42716
FBgn0265588	-4.21861	-2.3404	4.67765	0.0543668	0.687772	chr2L	8886133	8888028	-	lincRNA	CR44415
FBgn0037414	-4.2311	4.06534	6.5845	0.0294406	0.645879	chr3R	6248993	6251683	+	protein_coding	Osi7
FBgn0050241	-4.25679	-1.81555	10.2985	0.00649792	0.444181	chr2R	14984326	14984408	-	tRNA	tRNA:CR30241
FBgn0038492	-4.29408	4.60673	5.77547	0.0389048	0.674363	chr3R	17152994	17202130	-	protein_coding	Mur89F
FBgn0266942	-4.31627	-2.94707	5.6027	0.0469674	0.676845	chr3L	17947191	17947700	-	lincRNA	CR45393
FBgn0266798	-4.32433	-2.92468	5.98132	0.0416498	0.674646	chr2L	8862609	8867511	-	lincRNA	CR45260
FBgn0026754	-4.33281	-2.81631	7.63464	0.0190076	0.604067	chr2R	16843295	16845038	-	protein_coding	Ugt37c1
FBgn0259950	-4.36812	6.16594	6.73499	0.0283694	0.64571	chr2L	3387881	3388496	-	protein_coding	CG42460
FBgn0030570	-4.39829	-2.85206	6.38469	0.0288068	0.64571	chrX	14496134	14497240	+	protein_coding	CG12540
FBgn0047000	-4.49134	-2.02828	9.22862	0.00909609	0.479635	chr3L	6220577	6220949	+	protein_coding	CG33946
FBgn0034563	-4.52197	-2.87187	5.98446	0.041609	0.674646	chr2R	20972915	20974017	-	protein_coding	CG15649
FBgn0037645	-4.53209	3.69141	7.92147	0.0192013	0.604067	chr3R	8950245	8963037	-	protein_coding	CG11966
FBgn0037428	-4.61171	-0.720861	6.2829	0.0280582	0.645706	chr3R	6330247	6331809	+	protein_coding	Osi18
FBgn0003065	-4.64938	1.30498	7.39365	0.0207642	0.607782	chr3R	31763303	31764772	-	protein_coding	CG2150
FBgn0031701	-4.66721	-2.84747	5.3561	0.0509068	0.680312	chr2L	5329856	5330464	+	protein_coding	TotM
FBgn0085273	-4.70896	2.98084	11.5691	0.00670458	0.445256	chr3L	14235052	14235941	-	protein_coding	CG34244
FBgn0265347	-4.75412	-2.79171	8.18051	0.0222361	0.607782	chr2R	10786194	10786493	-	lincRNA	CR44301
FBgn0266026	-4.76812	-2.77175	7.77166	0.0247892	0.610483	chr2L	3389347	3389753	+	lincRNA	CR44791
FBgn0029552	-4.76997	-2.8081	8.5619	0.0201494	0.604067	chrX	1012034	1012624	+	protein_coding	CG14631
FBgn0083951	-4.8024	-1.72385	4.64959	0.0512763	0.680312	chr2R	20975487	20976934	+	protein_coding	CG34115
FBgn0005638	-4.84658	1.50065	7.37393	0.0212089	0.607782	chr2R	24331521	24334307	-	protein_coding	slbo
FBgn0085294	-4.89351	-0.376131	8.17402	0.0146686	0.569271	chr3L	3268460	3268994	+	protein_coding	CG34265
FBgn0264271	-4.90376	-1.41822	8.61559	0.0148987	0.572441	chr2R	11432649	11433298	-	lincRNA	CR43771
FBgn0265659	-4.91799	-2.52421	6.95356	0.0237352	0.607782	chr2R	16845494	16845995	+	lincRNA	CR44466
FBgn0266803	-4.94323	-2.70106	6.91469	0.0314823	0.65189	chr2R	10237743	10238145	-	lincRNA	CR45265
FBgn0262880	-4.96761	0.387006	14.0257	0.00273739	0.319695	chr2L	7693029	7693821	+	protein_coding	CG43235
FBgn0036416	-4.97332	4.2131	9.40178	0.0127964	0.540975	chr3L	14233468	14234609	+	protein_coding	CG7924
FBgn0262851	-5.10274	-2.54979	5.87698	0.0344781	0.656168	chrX	11589375	11591266	+	pseudogene	CR43215
FBgn0267130	-5.20244	-1.68226	18.6989	0.000743746	0.221346	chr3R	30404428	30404989	+	lincRNA	CR45570
FBgn0031942	-5.23273	-0.403001	7.35768	0.019646	0.604067	chr2L	7752169	7753186	-	protein_coding	CG7203
FBgn0263314	-5.23738	-2.404	14.1514	0.00334046	0.353344	chr2L	8490738	8491360	+	protein_coding	CG43400
FBgn0034828	-5.35729	1.05395	5.59266	0.0394457	0.674646	chr2R	23157576	23158185	-	protein_coding	CG13545
FBgn0036106	-5.41756	1.08241	21.5544	0.000545667	0.203859	chr3L	10880698	10882386	-	protein_coding	CG6409
FBgn0038508	-5.5023	-0.102999	6.23617	0.0300136	0.647729	chr3R	17415738	17416505	+	protein_coding	CG5866
FBgn0262023	-5.5408	3.70546	5.25866	0.0466645	0.676845	chr3R	17418758	17419294	+	protein_coding	CG42834
FBgn0052631	-5.60765	-0.90846	7.55087	0.0233934	0.607782	chrX	13556471	13557866	+	protein_coding	CG32631
FBgn0037429	-5.66657	0.190942	8.53174	0.013878	0.559382	chr3R	6335361	6337196	+	protein_coding	Osi19
FBgn0035478	-5.69644	-0.42366	5.51094	0.0481319	0.676845	chr3L	3947890	3948687	+	protein_coding	CG10853
FBgn0036417	-5.71743	3.74136	10.9805	0.00840089	0.468716	chr3L	14236634	14238272	+	protein_coding	CG7906
FBgn0037992	-5.73423	3.3164	10.5297	0.00925199	0.480806	chr3R	12121582	12128201	-	protein_coding	CG4702
FBgn0260646	-5.75049	-1.36859	11.6976	0.00634012	0.444181	chr3L	16034523	16034853	+	protein_coding	CG42538
FBgn0001256	-5.78345	5.03271	11.0759	0.00843332	0.468716	chr3L	13382764	13383999	+	protein_coding	ImpL1
FBgn0036527	-5.80991	-2.26166	8.08841	0.0164817	0.586311	chr3L	15679719	15681470	+	protein_coding	CG7304
FBgn0036528	-5.83804	-2.31002	8.27269	0.0220071	0.607782	chr3L	15681632	15683445	-	protein_coding	CG7579
FBgn0267695	-5.83895	0.517363	13.5028	0.0034029	0.355664	chr3L	14424500	14425926	+	lincRNA	CR46031
FBgn0038485	-5.94242	-2.06903	7.02704	0.0238719	0.607782	chr3R	17137892	17138865	+	protein_coding	CG5255
FBgn0261932	-6.19381	1.85593	15.0663	0.00273077	0.319695	chr3R	17406677	17407534	+	protein_coding	CG42798
FBgn0033355	-6.19954	2.31508	10.486	0.00893604	0.477314	chr2R	8940414	8941136	+	protein_coding	CG13748
FBgn0262874	-6.29374	1.72148	7.40042	0.0217572	0.607782	chrX	18138541	18139000	+	protein_coding	CG43229
FBgn0036022	-6.31551	1.99144	8.02096	0.0180402	0.601717	chr3L	9638111	9639021	+	protein_coding	CG8329
FBgn0267712	-6.31824	-2.0017	14.0078	0.00620186	0.444181	chr3R	21102007	21102889	-	lincRNA	CR46045
FBgn0033819	-6.37118	-1.99897	28.8553	0.000785264	0.225812	chr2R	13251851	13254337	-	protein_coding	CG4714
FBgn0262005	-6.37383	1.35201	10.1833	0.0092683	0.480806	chr3R	17404486	17405109	-	protein_coding	CG42823
FBgn0085235	-6.39198	2.11414	50.7565	9.15e-06	0.0132671	chr2R	22163737	22164594	-	protein_coding	CG34206
FBgn0037204	-6.3962	2.49322	22.3276	0.000679983	0.217088	chr3L	22898743	22900262	+	protein_coding	CG11131
FBgn0046880	-6.50313	0.743288	6.97559	0.0241212	0.607782	chr2R	19698713	19699346	-	protein_coding	Obp56b
FBgn0262024	-6.60619	-1.77207	5.99293	0.0367633	0.666703	chr3R	17420637	17420989	+	protein_coding	CG42835
FBgn0014850	-6.74999	-1.73533	6.73511	0.0422539	0.674646	chr3L	15660548	15661015	-	protein_coding	Eig71Ej
FBgn0037424	-6.88431	2.56957	14.4138	0.00349931	0.357235	chr3R	6301803	6303653	+	protein_coding	Osi15
FBgn0052274	-6.95507	-1.31875	24.7761	0.000463309	0.180783	chr3L	3335578	3335788	-	protein_coding	Drsl1
FBgn0038846	-6.99572	1.66988	21.5627	0.000699738	0.217972	chr3R	21015948	21017120	+	protein_coding	CG5697
FBgn0267685	-7.18028	-1.40224	12.1627	0.0115692	0.526188	chr3R	14527184	14527980	+	lincRNA	CR46021
FBgn0014851	-7.22063	-1.39259	6.29541	0.0518603	0.680312	chr3L	15661247	15661809	+	protein_coding	Eig71Ek
FBgn0045479	-7.23821	0.563432	61.4159	9.82e-06	0.0132671	chr3L	4026768	4028600	+	protein_coding	Gr64a
FBgn0034990	-7.50823	3.25212	10.9977	0.00838187	0.468716	chr2R	24202090	24208203	-	protein_coding	CG11406
FBgn0039592	-7.64854	3.47449	14.4244	0.00381014	0.369625	chr3R	28641584	28642891	-	protein_coding	CG14062
FBgn0266403	-7.68223	0.328542	19.3389	0.000895428	0.232204	chr3L	3522849	3523620	-	lincRNA	CR45043
FBgn0085309	-7.72455	0.394495	19.0321	0.000966995	0.239147	chr3R	17403271	17403718	-	protein_coding	CG34280
FBgn0037430	-8.00639	1.2782	11.0182	0.00752925	0.451236	chr3R	6340094	6341424	+	protein_coding	Osi20
FBgn0052279	-8.27444	3.67128	6.33154	0.0323157	0.65189	chr3L	3314348	3314681	+	protein_coding	Drsl2
FBgn0036023	-8.52873	4.76726	7.27739	0.0239811	0.607782	chr3L	9639270	9640140	+	protein_coding	CG18179
FBgn0266456	-8.76252	6.70454	23.2716	0.00086301	0.229894	chr3L	19266060	19266838	+	protein_coding	CG45081
FBgn0030495	-8.81241	2.08643	9.53844	0.0118975	0.52888	chrX	13552558	13555800	-	protein_coding	CG11816
FBgn0038509	-8.81487	3.53286	10.3182	0.0101224	0.490959	chr3R	17421689	17422202	-	protein_coding	CG14332
FBgn0036656	-9.2525	3.35694	9.63659	0.0195181	0.604067	chr3L	16724677	16726169	-	protein_coding	CG13026
FBgn0265587	-9.58483	0.687769	18.9704	0.00233386	0.31369	chr2L	8867874	8868747	+	lincRNA	CR44414
FBgn0262528	-9.95914	1.0263	12.2431	0.0229683	0.607782	chr3L	15661866	15662279	+	protein_coding	CG43082
FBgn0043577	-10.3526	7.9618	17.7071	0.00214999	0.31369	chr3L	16726540	16727288	+	protein_coding	PGRP-SB2
FBgn0004594	-11.4712	6.07353	16.851	0.00251733	0.318015	chr3L	15657627	15658149	+	protein_coding	Eig71Eg
FBgn0004588	-11.4847	6.92223	18.3018	0.00193827	0.301953	chr3L	15649125	15649661	-	protein_coding	Eig71Ea
FBgn0263376	-12.0505	5.26192	10.014	0.0111273	0.517371	chr2R	14737577	14739242	-	lincRNA	CR43428
FBgn0053998	-12.1481	5.36895	9.97123	0.0186874	0.603142	chr2R	18738491	18739143	+	protein_coding	CG33998
FBgn0052475	-12.1546	3.16951	523.52	2.66e-08	0.000116841	chr3L	22427	26308	+	protein_coding	mthl8
FBgn0261634	-12.2709	5.49077	14.8311	0.00371665	0.362559	chr3L	16032761	16033190	-	protein_coding	CG42717
FBgn0004589	-12.8699	6.92509	21.9202	0.0010699	0.250486	chr3L	15649935	15650541	+	protein_coding	Eig71Eb
FBgn0261630	-13.3987	5.8936	11.6765	0.0134143	0.552917	chr2L	8891439	8892180	+	protein_coding	CG42713
FBgn0052762	-13.4745	7.82125	21.4951	0.00321044	0.345842	chrX	5500207	5501229	-	protein_coding	CG32762
FBgn0029770	-13.6813	8.26469	24.6228	0.00226456	0.31369	chrX	5501475	5502782	+	protein_coding	CG4151

## Sheet: PB_M.W_DES_pv0.05_FC0.5
GeneID	logFC	logCPM	F	PValue	FDR	Chr	start	end	strand	function	name
FBgn0037428	14.2556	5.62685	7.97719	0.0264878	0.567203	chr3R	6330247	6331809	+	protein_coding	Osi18
FBgn0037429	9.1572	6.58899	9.19012	0.0129573	0.524921	chr3R	6335361	6337196	+	protein_coding	Osi19
FBgn0038132	8.84263	1.0364	6.28818	0.0403158	0.588168	chr3R	13287654	13288813	-	protein_coding	CG15887
FBgn0036591	8.79636	4.30308	27.9953	0.000379294	0.266401	chr3L	16278457	16279271	-	protein_coding	CG13050
FBgn0034204	8.79566	0.331278	7.89332	0.024228	0.567203	chr2R	17165083	17166643	-	protein_coding	CG10953
FBgn0037430	8.24752	5.92789	8.59011	0.0153613	0.535623	chr3R	6340094	6341424	+	protein_coding	Osi20
FBgn0020641	8.1815	-0.263328	23.3873	0.000696224	0.291627	chr3L	6143394	6144101	+	protein_coding	Lcp65Ad
FBgn0037424	7.95672	3.76809	9.60739	0.0115523	0.52379	chr3R	6301803	6303653	+	protein_coding	Osi15
FBgn0036878	7.86312	-0.522077	52.1532	2.94e-05	0.114157	chr3L	19517551	19518332	-	protein_coding	Cpr76Ba
FBgn0037418	7.55921	5.98885	9.29493	0.0125857	0.52379	chr3R	6267590	6268757	-	protein_coding	Osi11
FBgn0039151	7.35791	0.313789	72.6482	6.97e-06	0.0612344	chr3R	24114042	24116322	-	protein_coding	CG13607
FBgn0002570	7.20976	-0.899554	6.87347	0.0284219	0.573633	chr2R	8449663	8451904	-	protein_coding	Mal-A1
FBgn0039387	7.12354	2.66075	11.4484	0.00717052	0.490811	chr3R	25897475	25899744	+	protein_coding	MCO3
FBgn0020765	6.93199	3.86585	13.5493	0.00440216	0.441862	chr3L	6152049	6152745	-	protein_coding	Acp65Aa
FBgn0267515	6.90517	-1.86859	7.32866	0.0227563	0.556514	chrX	23205821	23206525	+	pseudogene	28SrRNA-Psi:CR45855
FBgn0052237	6.88591	-0.725979	9.55263	0.0123211	0.52379	chr3L	4849437	4852461	-	protein_coding	CG32237
FBgn0037114	6.69732	0.343706	14.0848	0.00411608	0.441862	chr3L	21666451	21666980	-	protein_coding	Cpr78E
FBgn0038485	6.54847	-1.49151	6.49791	0.0436651	0.593893	chr3R	17137892	17138865	+	protein_coding	CG5255
FBgn0037420	6.49572	-0.0805608	10.2402	0.010386	0.517481	chr3R	6284461	6285200	-	protein_coding	CG15597
FBgn0050378	6.35143	-0.845191	18.0484	0.00171463	0.345447	chr2R	7950338	7951492	+	protein_coding	CG30378
FBgn0047000	6.34454	-1.66264	8.94864	0.0208034	0.548991	chr3L	6220577	6220949	+	protein_coding	CG33946
FBgn0032116	6.34132	-0.751472	18.0442	0.00171595	0.345447	chr2L	9416587	9426342	+	protein_coding	Mco1
FBgn0032370	6.27382	-0.96761	6.68044	0.0289311	0.574257	chr2L	11651330	11652010	-	protein_coding	CG12307
FBgn0050045	6.20391	2.77129	18.4802	0.00151364	0.345447	chr2R	12376625	12377378	+	protein_coding	Cpr49Aa
FBgn0035583	6.18095	-1.53501	11.7983	0.00643625	0.481037	chr3L	4898899	4900869	+	protein_coding	CG13704
FBgn0039415	6.10093	-0.800383	24.6954	0.000571313	0.285818	chr3R	26133153	26137148	+	protein_coding	CG6142
FBgn0039264	6.09256	3.16509	7.94358	0.0185886	0.540429	chr3R	25046322	25047409	+	protein_coding	CG11786
FBgn0033730	6.08628	-1.2285	13.6466	0.00418659	0.441862	chr2R	12407792	12408523	+	protein_coding	Cpr49Ag
FBgn0034513	6.04339	-1.37249	14.1658	0.00373467	0.432923	chr2R	20536577	20538264	+	protein_coding	CG13423
FBgn0003249	5.95893	-1.21137	11.3316	0.00722042	0.490811	chr3R	20081059	20082450	-	protein_coding	Rh3
FBgn0036112	5.94204	-1.87236	7.28437	0.0316918	0.574257	chr3L	10972647	10973476	+	protein_coding	CG14147
FBgn0015032	5.93103	-1.57304	18.7433	0.00150997	0.345447	chr3R	30894037	30900688	+	protein_coding	Cyp4c3
FBgn0030777	5.90572	-1.22432	9.51398	0.0116234	0.52379	chrX	16705970	16706874	-	protein_coding	CG9672
FBgn0030394	5.89993	-1.87151	8.52994	0.0153675	0.535623	chrX	12486969	12489448	+	protein_coding	Cpr11A
FBgn0053296	5.87185	-1.78008	13.3953	0.00442894	0.441862	chr2L	7713997	7716645	-	protein_coding	CG33296
FBgn0031332	5.81502	-1.3514	11.9032	0.00627443	0.474882	chr2L	1351727	1352868	-	protein_coding	CG5556
FBgn0265310	5.77458	-1.176	13.4481	0.00437667	0.441862	chr2R	9161483	9161998	+	lincRNA	CR44283
FBgn0085243	5.75783	-1.62156	22.2519	0.000832128	0.310879	chr2R	24665426	24666022	-	protein_coding	CG34214
FBgn0038529	5.75711	-1.4562	9.46286	0.0117885	0.52379	chr3R	17621198	17622112	-	protein_coding	CG14323
FBgn0037645	5.75276	4.29672	16.4911	0.00239054	0.402447	chr3R	8950245	8963037	-	protein_coding	CG11966
FBgn0085234	5.74322	2.4795	16.9352	0.00194558	0.375412	chr2R	22130111	22131299	-	protein_coding	CG34205
FBgn0032359	5.73428	5.7735	6.89469	0.0257894	0.567203	chr2L	11284326	11285706	-	protein_coding	Osi21
FBgn0050277	5.71628	-1.79752	7.51919	0.0208541	0.548991	chr2R	22218455	22220905	-	protein_coding	Oatp58Da
FBgn0038750	5.67701	-2.02811	18.2268	0.00165904	0.345447	chr3R	19915867	19917839	-	protein_coding	CG4465
FBgn0030829	5.66333	2.66047	7.91763	0.0187347	0.540429	chrX	17218666	17219787	+	protein_coding	CG12998
FBgn0040799	5.65975	-1.93978	12.0147	0.00610786	0.471824	chr3L	16264712	16265100	-	protein_coding	CG13051
FBgn0036656	5.65672	-1.84651	6.06807	0.0336042	0.574257	chr3L	16724677	16726169	-	protein_coding	CG13026
FBgn0035859	5.63713	-0.752	24.2906	0.000606851	0.285818	chr3L	8222140	8222953	+	protein_coding	CG13678
FBgn0085472	5.6369	-1.97024	6.5278	0.028732	0.574257	chr2R	14367978	14369067	+	protein_coding	CG34443
FBgn0030774	5.61967	-1.46408	8.48945	0.0155507	0.535623	chrX	16700445	16701972	-	protein_coding	spheroide
FBgn0085351	5.59942	-2.00745	6.49255	0.0290736	0.574257	chrX	11726389	11733895	-	protein_coding	inaF-A
FBgn0010357	5.5363	-2.00705	8.24526	0.0167138	0.535623	chr2R	11346324	11347395	+	protein_coding	betaTry
FBgn0033440	5.44072	-1.50395	15.6926	0.00270887	0.406539	chr2R	9707535	9708722	+	protein_coding	CG10459
FBgn0020642	5.4144	-2.1104	8.6034	0.0150417	0.535623	chr3L	6144818	6145393	+	protein_coding	Lcp65Ac
FBgn0033728	5.38802	4.17552	16.6349	0.00232467	0.3963	chr2R	12402215	12405108	+	protein_coding	Cpr49Ae
FBgn0033597	5.37176	3.59232	16.0465	0.00260057	0.405088	chr2R	11251750	11253398	-	protein_coding	Cpr47Ea
FBgn0036766	5.36793	-1.98067	12.4595	0.00549408	0.459383	chr3L	17883648	17884376	-	protein_coding	CG5506
FBgn0032322	5.3658	-1.68874	16.9223	0.00212225	0.38766	chr2L	10972279	10973408	+	protein_coding	CG16743
FBgn0038131	5.36164	5.79295	6.57067	0.0286773	0.574257	chr3R	13284945	13286529	-	protein_coding	CG15888
FBgn0028949	5.35693	-2.28263	9.75354	0.0169394	0.535623	chr2L	15613904	15614828	-	protein_coding	CG15254
FBgn0029716	5.35143	-2.02667	6.19108	0.0322075	0.574257	chrX	4558071	4560317	+	protein_coding	CG3546
FBgn0267667	5.33784	-1.56357	24.1636	0.000618547	0.285818	chr3L	6125404	6129890	+	lincRNA	CR46005
FBgn0085357	5.30837	-1.82246	8.39824	0.0159733	0.535623	chrX	18399568	18400065	-	protein_coding	CG34328
FBgn0052160	5.30025	-1.97949	16.2256	0.00243333	0.403083	chr3L	16308939	16311318	+	lincRNA	CR32160
FBgn0050196	5.28226	-1.90482	14.0316	0.00384556	0.441335	chr2R	22654804	22655392	-	protein_coding	CG30196
FBgn0267096	5.28166	-1.95517	6.78843	0.0263524	0.567203	chrX	8163302	8163479	+	lincRNA	CR45536
FBgn0032650	5.2696	-1.58194	9.70351	0.0110352	0.523316	chr2L	17554353	17555765	-	protein_coding	CG7094
FBgn0053140	5.25369	-1.74179	9.46807	0.0117716	0.52379	chr2R	7178389	7180730	+	protein_coding	CG33140
FBgn0262879	5.24918	-1.69944	24.3291	0.000603361	0.285818	chr2L	20476710	20478920	-	lincRNA	CR43234
FBgn0003254	5.24291	-1.64217	11.3957	0.00710619	0.489324	chr2R	19270077	19281396	+	protein_coding	rib
FBgn0050384	5.24226	-1.65549	9.05822	0.013201	0.528549	chr2R	7182996	7185298	+	protein_coding	CG30384
FBgn0038892	5.24113	-1.15649	14.2699	0.00365125	0.432923	chr3R	21567518	21569149	-	protein_coding	CG15498
FBgn0032131	5.20934	-2.12339	11.0994	0.0076535	0.493903	chr2L	9589475	9591783	+	protein_coding	CG3841
FBgn0264568	5.1832	-2.14054	11.2207	0.00742332	0.493903	chr3L	21594596	21595460	+	lincRNA	CR43940
FBgn0028963	5.16406	-1.54574	10.6161	0.00865987	0.506271	chr2R	12842664	12844704	+	protein_coding	Or49b
FBgn0036482	5.16378	-1.65649	6.80477	0.0262114	0.567203	chr3L	15127939	15131378	-	protein_coding	CG13457
FBgn0010401	5.15863	-1.73251	6.87272	0.0256348	0.567203	chr3R	7978958	7979614	+	protein_coding	Os-C
FBgn0267692	5.15697	-2.38128	14.1937	0.00371206	0.432923	chr3R	15922928	15924187	-	lincRNA	CR46028
FBgn0033742	5.13439	-2.07244	14.9671	0.00314712	0.428994	chr2R	12471914	12474021	+	protein_coding	CG8550
FBgn0039719	5.12744	-2.15863	7.36597	0.0218814	0.553995	chr3R	29905463	29906448	+	protein_coding	CG15515
FBgn0033271	5.12731	-1.71287	7.27005	0.0225559	0.556514	chr2R	8159405	8161565	-	protein_coding	CG8708
FBgn0040842	5.11618	-2.01661	8.47907	0.0155981	0.535623	chr3L	5131544	5132127	+	protein_coding	CG15212
FBgn0028518	5.1055	-2.2391	10.1022	0.00991135	0.51499	chr2L	15630001	15634987	+	protein_coding	CG18480
FBgn0038897	5.0867	-2.093	8.89587	0.0138249	0.532794	chr3R	21740104	21744431	+	protein_coding	CG5849
FBgn0031732	5.06603	-2.26636	6.37103	0.03029	0.574257	chr2L	5718120	5720899	-	protein_coding	CG11149
FBgn0085786	5.05721	-1.72023	8.48741	0.01556	0.535623	chr2R	3524535	3526047	-	pseudogene	CR41501
FBgn0038732	5.03858	-1.99179	10.8196	0.00821766	0.506271	chr3R	19778749	19780727	+	protein_coding	CG11391
FBgn0038468	5.02522	-1.81453	7.36688	0.0218751	0.553995	chr3R	17028692	17030701	+	protein_coding	CG5225
FBgn0034196	5.0186	-1.72057	7.63713	0.0201031	0.546999	chr2R	17126409	17127023	-	protein_coding	CG15605
FBgn0038211	5.01186	-2.15808	7.86143	0.0187635	0.540429	chr3R	14215458	14217882	-	protein_coding	CG9649
FBgn0266228	5.0045	-2.01933	9.348	0.01217	0.52379	chr3R	4718588	4719399	-	lincRNA	CR44923
FBgn0263520	4.98737	-1.98057	10.7686	0.00832588	0.506271	chr3R	11442191	11442306	-	pre_miRNA	mir-4945
FBgn0267519	4.98536	2.10227	18.7969	0.00117018	0.345447	chrX	23214451	23217140	+	pseudogene	28SrRNA-Psi:CR45859
FBgn0038852	4.97788	-2.00679	12.6087	0.00530503	0.45607	chr3R	21076861	21080926	-	protein_coding	HHEX
FBgn0052570	4.97729	-2.18639	8.17814	0.0170518	0.535623	chrX	16734946	16735980	+	protein_coding	TwdlY
FBgn0033603	4.97486	1.47734	30.3054	0.000111609	0.163312	chr2R	11266914	11272575	-	protein_coding	Cpr47Ef
FBgn0264485	4.96762	-2.2043	10.8274	0.0082012	0.506271	chr3L	19229060	19230102	+	lincRNA	CR43893
FBgn0033408	4.94187	-1.50763	7.27895	0.0224923	0.556514	chr2R	9395329	9396206	-	protein_coding	CG8800
FBgn0040608	4.93392	-2.30329	10.5833	0.00873374	0.506271	chr3R	26727313	26730117	+	protein_coding	CG14246
FBgn0266691	4.92747	-1.39771	17.8172	0.00179004	0.353161	chr3L	27135423	27136049	-	lincRNA	CR45181
FBgn0035956	4.92499	-2.02788	9.45652	0.0118092	0.52379	chr3L	9012685	9019246	-	protein_coding	Doc2
FBgn0044049	4.91922	-2.24109	14.4493	0.00351278	0.431917	chr3L	9803398	9804263	-	protein_coding	Ilp4
FBgn0039795	4.90123	7.06517	6.42722	0.0300816	0.574257	chr3R	30690641	30692768	+	protein_coding	Spn100A
FBgn0265458	4.90052	-2.08561	8.7425	0.0144474	0.532794	chrX	11079290	11079772	+	lincRNA	CR44358
FBgn0265545	4.88413	-2.26462	5.33566	0.043647	0.593893	chr2L	17247160	17247656	+	lincRNA	CR44395
FBgn0026386	4.87871	-2.39288	6.13217	0.0426964	0.592232	chr2R	11250367	11251913	+	protein_coding	Or47a
FBgn0083960	4.84626	-2.19804	8.0752	0.0175866	0.539558	chr2L	4958410	4965430	+	protein_coding	CG34124
FBgn0030016	4.84106	-2.16208	8.25621	0.0166594	0.535623	chrX	8164265	8165708	-	protein_coding	Or7a
FBgn0038133	4.8384	6.69297	5.29209	0.0447763	0.597437	chr3R	13290628	13291846	+	protein_coding	Osi22
FBgn0086519	4.83785	-0.715088	9.94217	0.00766007	0.493903	chr2R	11277956	11278445	-	protein_coding	Cpr47Eg
FBgn0085329	4.83464	-2.01944	10.814	0.00822941	0.506271	chr3R	30305807	30306640	-	protein_coding	CG34300
FBgn0032090	4.83331	-2.1356	6.28739	0.0311634	0.574257	chr2L	9024319	9031836	-	protein_coding	CG9582
FBgn0030815	4.82526	0.913655	11.8001	0.00482636	0.448391	chrX	17080422	17087675	-	protein_coding	CG8945
FBgn0039203	4.81801	2.59409	29.5387	0.000183097	0.240755	chr3R	24524793	24527533	+	protein_coding	CG13618
FBgn0038436	4.80487	-1.42583	9.70847	0.0110203	0.523316	chr3R	16477109	16481070	+	protein_coding	Gyc-89Db
FBgn0067407	4.8046	-2.43346	11.763	0.00649194	0.481037	chr3R	27845088	27845414	+	pseudogene	Or98P
FBgn0028844	4.79868	-1.97408	6.09543	0.0332872	0.574257	chr2L	14450281	14450922	-	protein_coding	CG15283
FBgn0033788	4.78363	-0.783642	11.8351	0.00441429	0.441862	chr2R	13044694	13047256	-	protein_coding	CG13323
FBgn0259223	4.78043	7.26609	20.6861	0.00110762	0.344605	chrX	18422412	18427001	+	protein_coding	CG42323
FBgn0039761	4.77578	-2.39371	5.94549	0.0350703	0.574257	chr3R	30253181	30254097	+	protein_coding	CG18404
FBgn0036969	4.77174	-2.01163	14.8211	0.00324537	0.428994	chr3L	20320951	20322358	+	protein_coding	Spn77Bb
FBgn0053017	4.7604	-1.57219	7.39379	0.0216904	0.553995	chr2R	16272113	16277655	+	protein_coding	CG33017
FBgn0086658	4.75976	-2.26295	6.73464	0.0268232	0.567203	chr2R	11591340	11591485	-	snoRNA	snoRNA:Psi28S-1180
FBgn0032285	4.75245	1.00108	6.18771	0.030036	0.574257	chr2L	10692939	10694103	-	protein_coding	CG17108
FBgn0266684	4.75089	-1.91171	12.0634	0.00603677	0.471824	chr3L	23690625	23691668	-	lincRNA	CR45174
FBgn0058298	4.74629	-1.87874	7.10452	0.0237806	0.56547	chr3L	23726828	23727989	+	protein_coding	CG40298
FBgn0036870	4.74252	-2.43796	10.4232	0.0146366	0.532794	chr3L	19464048	19464759	-	protein_coding	CG14095
FBgn0085287	4.73522	-2.22586	5.2286	0.0454082	0.599468	chr3L	19951234	19951968	-	protein_coding	CG34258
FBgn0039408	4.72429	-1.86561	20.2157	0.00116551	0.345447	chr3R	26061267	26063011	-	protein_coding	CG14551
FBgn0034713	4.72305	-1.84121	6.52159	0.0287918	0.574257	chr2R	22211370	22212704	+	protein_coding	CG11291
FBgn0051286	4.72223	-1.89104	6.64248	0.0276539	0.569318	chr3R	6641231	6643346	+	protein_coding	CG31286
FBgn0037099	4.68713	4.54562	6.29534	0.0314476	0.574257	chr3L	21555372	21558226	-	protein_coding	CG7173
FBgn0266980	4.68284	-2.25195	7.87777	0.0186702	0.540429	chr3L	22498309	22498839	+	lincRNA	CR45431
FBgn0267536	4.68197	-2.31743	6.9538	0.0249668	0.567203	chr3L	9991735	9992583	+	lincRNA	CR45876
FBgn0264960	4.67266	-2.21557	5.3766	0.0429958	0.593627	chrX	16815494	16815945	-	lincRNA	CR44129
FBgn0031466	4.66889	-1.83773	5.55008	0.0403653	0.588168	chr2L	2834886	2837833	-	protein_coding	CG3119
FBgn0039483	4.66855	-1.88908	5.21477	0.045642	0.6001	chr3R	27094532	27095856	+	protein_coding	CG14259
FBgn0052241	4.6666	-1.98935	6.8932	0.025464	0.567203	chr3L	4465104	4466630	-	protein_coding	CG32241
FBgn0085771	4.66615	0.750264	11.0927	0.00616739	0.471824	chrX	23239717	23240975	+	pseudogene	28SrRNA-Psi:CR40741
FBgn0263080	4.65942	-2.47229	6.54042	0.0379395	0.586606	chr2L	1199411	1199924	+	protein_coding	CG43348
FBgn0051626	4.65932	-2.13057	13.3978	0.00442647	0.441862	chr2L	21232494	21236733	-	protein_coding	CG31626
FBgn0265878	4.65537	-2.43419	11.7536	0.00650682	0.481037	chr2R	20837494	20838695	+	lincRNA	CR44667
FBgn0029964	4.64603	-2.29302	9.28671	0.0123797	0.52379	chrX	7858172	7858794	+	protein_coding	CG1409
FBgn0033590	4.63939	-2.52973	7.81871	0.0268816	0.567203	chr2R	11236202	11236686	-	protein_coding	CG13217
FBgn0042110	4.63914	-2.45124	7.56184	0.0205786	0.548991	chr3R	11690385	11691799	-	protein_coding	CG18765
FBgn0002535	4.6383	-1.67401	5.86515	0.0360737	0.581118	chr2R	8437646	8438495	+	protein_coding	Lcp4
FBgn0030992	4.63157	-1.99347	7.51351	0.0208911	0.549143	chrX	19183420	19187278	+	protein_coding	CG33253
FBgn0065070	4.62566	-2.27302	8.1307	0.0172958	0.539558	chr3R	28812567	28812641	+	snoRNA	snoRNA:291
FBgn0030204	4.62489	-2.20012	10.2968	0.00941317	0.510141	chrX	10458185	10459676	-	protein_coding	Or9a
FBgn0052564	4.6097	-2.4527	9.95758	0.0103022	0.516564	chrX	17206406	17207854	+	protein_coding	CG32564
FBgn0030994	4.60608	-1.93638	14.7978	0.00326142	0.428994	chrX	19190213	19191029	+	protein_coding	HP1D3csd
FBgn0002922	4.59947	-0.526305	11.5896	0.0047284	0.446376	chr3R	23712813	23718357	-	protein_coding	nau
FBgn0267566	4.58708	-2.21478	9.92126	0.0104033	0.517481	chr3R	7110011	7110264	+	lincRNA	CR45906
FBgn0039851	4.5789	6.34877	8.018	0.0181776	0.540429	chr3R	31499234	31506992	+	protein_coding	mey
FBgn0044011	4.57798	-2.06213	7.10276	0.023794	0.56547	chr2R	7153737	7155424	-	protein_coding	Spn43Ad
FBgn0001256	4.5688	7.43567	5.33287	0.0441125	0.595859	chr3L	13382764	13383999	+	protein_coding	ImpL1
FBgn0034899	4.56098	-2.47062	6.92907	0.0251683	0.567203	chr2R	23747559	23748477	+	protein_coding	CG13560
FBgn0034162	4.56094	3.02892	9.66818	0.0112234	0.523316	chr2R	16869401	16871851	+	protein_coding	CG6426
FBgn0034663	4.56074	-2.5094	5.87049	0.0461616	0.600409	chr2R	21834229	21835047	-	protein_coding	CG4363
FBgn0265866	4.55536	-2.43139	5.09642	0.0477047	0.601557	chrX	13990732	13991420	+	lincRNA	CR44655
FBgn0035865	4.54721	1.98963	14.2776	0.00305318	0.428994	chr3L	8290285	8295327	-	protein_coding	CG7201
FBgn0267339	4.54641	-2.19212	7.67046	0.0198968	0.545114	chr3R	24149019	24150203	-	protein_coding	p38c
FBgn0261987	4.54513	-2.03598	6.02352	0.0341282	0.574257	chr3R	17719453	17722955	+	protein_coding	Pxt
FBgn0262996	4.54392	-2.51224	6.44392	0.0389988	0.588168	chr2L	17541853	17542383	+	lincRNA	CR43304
FBgn0028852	4.52384	-2.29347	10.0087	0.010162	0.516564	chr2L	15297807	15299367	+	protein_coding	CG15262
FBgn0031579	4.52369	-2.07014	8.43363	0.0158077	0.535623	chr2L	4004983	4005670	+	protein_coding	CG15422
FBgn0266796	4.52228	-1.19133	10.6592	0.00618028	0.471824	chr2L	19327366	19327963	+	lincRNA	CR45258
FBgn0035548	4.51831	-2.02546	5.36909	0.0431143	0.593627	chr3L	4460621	4461504	-	protein_coding	CG15023
FBgn0262172	4.51629	-2.20079	9.17506	0.012773	0.523887	chr2R	9621233	9621353	+	pre_miRNA	mir-307b
FBgn0261402	4.50511	-2.57299	8.14998	0.0247224	0.567203	chr3L	17818072	17820193	-	protein_coding	Ir75b
FBgn0050237	4.50227	-2.07871	9.86054	0.0105749	0.522976	chr2R	16207634	16207706	-	tRNA	tRNA:CR30237
FBgn0050192	4.50082	-2.08055	5.10287	0.0475894	0.601557	chr2R	23138588	23139085	+	protein_coding	CG30192
FBgn0260969	4.49496	-2.40393	5.36053	0.04325	0.593627	chr3R	29835609	29836288	-	protein_coding	CG42592
FBgn0011878	4.49324	-2.53254	8.68978	0.0146693	0.532794	chr2R	12336417	12336489	+	tRNA	tRNA:H:48F
FBgn0032335	4.49229	-2.2763	6.4481	0.0295115	0.574257	chr2L	11071026	11071532	+	protein_coding	CG14915
FBgn0036677	4.49005	10.1344	5.77294	0.0376659	0.584657	chr3L	16923913	16927434	-	protein_coding	CG13023
FBgn0264775	4.48926	-2.02619	9.94947	0.0103246	0.516564	chr3R	15508895	15509917	-	protein_coding	CG44013
FBgn0039147	4.48517	-2.2674	8.06619	0.0176343	0.539558	chr3R	24107390	24108358	+	protein_coding	CG10694
FBgn0039124	4.47362	-2.03274	8.56342	0.015218	0.535623	chr3R	23891596	23893383	-	protein_coding	tbrd-1
FBgn0011931	4.46639	-2.4149	7.36889	0.0218613	0.553995	chr2R	6162518	6162592	+	tRNA	tRNA:N5:42Aa
FBgn0263872	4.45014	-2.32201	12.7125	0.00517818	0.45607	chr2L	308536	309348	-	lincRNA	CR43719
FBgn0265087	4.4482	-2.53893	10.2778	0.00946047	0.510637	chr2L	13118871	13119288	-	lincRNA	CR44198
FBgn0051742	4.43872	-2.00076	6.60773	0.0279753	0.571184	chr2L	17990417	17991951	+	protein_coding	Prosbeta5R2
FBgn0004779	4.43583	-2.55049	5.76078	0.0477239	0.601557	chr3R	6690886	6691758	-	protein_coding	Ccp84Ae
FBgn0011893	4.43093	-2.47084	10.4944	0.00893809	0.506271	chr2R	6947737	6947810	-	tRNA	tRNA:K2:42Eb
FBgn0029657	4.42282	-1.61684	10.3527	0.0092758	0.509333	chrX	3387943	3448943	-	protein_coding	CG12535
FBgn0262539	4.41447	-2.29107	7.94328	0.0183019	0.540429	chr3R	22769774	22770307	-	protein_coding	CG43093
FBgn0051728	4.40958	3.54945	10.3432	0.00948047	0.510637	chr2L	13251508	13257426	+	protein_coding	CG31728
FBgn0262587	4.40949	-2.22486	8.95809	0.0135817	0.532794	chr3R	28263870	28264773	-	protein_coding	CG43124
FBgn0037416	4.40942	9.39444	7.32889	0.0224558	0.556514	chr3R	6260210	6262105	+	protein_coding	Osi9
FBgn0050091	4.4084	-1.99373	7.06321	0.0240988	0.567203	chr2R	15680544	15682477	+	protein_coding	CG30091
FBgn0036808	4.40223	-2.29602	9.63495	0.0112437	0.523316	chr3L	18696401	18698412	-	protein_coding	dic-04
FBgn0265731	4.39947	-1.61945	5.1143	0.0473858	0.601557	chr3L	10205619	10206401	+	lincRNA	CR44538
FBgn0038151	4.39717	-2.23051	5.29052	0.0443792	0.595859	chr3R	13405108	13406998	-	protein_coding	yellow-e2
FBgn0266929	4.38931	-2.40016	7.38184	0.0217722	0.553995	chr3L	3329280	3329597	+	lincRNA	CR45380
FBgn0040252	4.38916	-2.47774	8.77867	0.0142976	0.532794	chr3R	11175528	11177910	+	protein_coding	Ugt86Dh
FBgn0043471	4.38888	-2.5164	8.54572	0.0152968	0.535623	chr2R	11337796	11338733	-	protein_coding	kappaTry
FBgn0033096	4.38656	-2.20144	6.04581	0.0338647	0.574257	chr2R	6716341	6717707	-	protein_coding	Zip42C.1
FBgn0004053	4.38398	-2.3693	5.90262	0.0356015	0.578285	chr3R	6752863	6754194	-	protein_coding	zen
FBgn0030951	4.37188	-2.33345	6.4215	0.0297774	0.574257	chrX	18739215	18739895	-	protein_coding	CG6873
FBgn0262022	4.35748	-2.61748	7.41428	0.0298628	0.574257	chr3L	20200092	20200487	+	protein_coding	CG42833
FBgn0031929	4.35646	-2.41685	5.39973	0.0426331	0.592232	chr2L	7689310	7691061	-	protein_coding	CG18585
FBgn0065073	4.35604	-2.53222	8.43651	0.0157943	0.535623	chr2R	23073828	23073968	-	snoRNA	snoRNA:229
FBgn0085265	4.35387	-2.06954	6.51604	0.0288453	0.574257	chr2R	13604494	13605655	-	protein_coding	CG34236
FBgn0051867	4.35177	-2.16013	9.17942	0.0127574	0.523887	chr2L	11144578	11145417	-	protein_coding	CG31867
FBgn0262537	4.34863	-2.27258	10.5271	0.00886214	0.506271	chr3R	22768120	22768733	-	protein_coding	CG43091
FBgn0032434	4.34596	-2.17568	9.30533	0.0123155	0.52379	chr2L	12446079	12448132	-	protein_coding	CG5421
FBgn0010241	4.34474	-2.02498	9.20168	0.0126779	0.52379	chr2R	14246965	14252597	+	protein_coding	Mdr50
FBgn0037462	4.33221	-2.01451	6.84937	0.0258311	0.567203	chr3R	6630150	6631184	+	protein_coding	sunz
FBgn0265040	4.32395	-2.05379	13.4137	0.00441066	0.441862	chr3R	4673976	4674610	+	lincRNA	CR44157
FBgn0085819	4.32257	2.1574	12.1819	0.00529776	0.45607	chrX	23261771	23262666	-	pseudogene	28SrRNA-Psi:CR41609
FBgn0037260	4.31343	-2.39178	7.7773	0.0192528	0.540667	chr3R	4541355	4543215	+	protein_coding	Mur82C
FBgn0263615	4.30756	-2.31912	9.47079	0.0117627	0.52379	chr3L	11898604	11900431	+	lincRNA	CR43624
FBgn0265915	4.30373	-2.09555	8.05971	0.0176688	0.539558	chr2R	21070748	21071895	+	lincRNA	CR44704
FBgn0033412	4.29644	-1.80938	8.29473	0.0164699	0.535623	chr2R	9421971	9423688	-	protein_coding	CG13955
FBgn0038345	4.29261	-1.65175	6.64215	0.0276569	0.569318	chr3R	15494601	15495620	+	protein_coding	CG5213
FBgn0036015	4.29175	-2.55097	5.27839	0.0445785	0.596792	chr3L	9600489	9601325	-	protein_coding	CG3088
FBgn0267114	4.29174	-2.55244	5.33617	0.0436388	0.593893	chr3R	31469102	31469978	+	lincRNA	CR45554
FBgn0050383	4.28617	-2.28044	5.33921	0.04359	0.593893	chr2R	7823942	7825141	-	protein_coding	CG30383
FBgn0265011	4.28604	4.81854	9.86409	0.0107796	0.523316	chr2R	8992944	9006587	-	protein_coding	Np
FBgn0031976	4.28422	0.152987	11.89	0.00445583	0.442033	chr2L	8026913	8039788	-	protein_coding	CG7367
FBgn0038790	4.2812	-2.43663	8.07368	0.0175946	0.539558	chr3R	20360307	20360634	+	protein_coding	MtnC
FBgn0261830	4.28073	-2.51117	7.8365	0.0189069	0.540429	chr2L	8143400	8144047	-	protein_coding	CG42762
FBgn0263546	4.27368	-2.40192	6.01746	0.0342002	0.574257	chr2R	24294230	24294331	+	pre_miRNA	mir-4985
FBgn0036622	4.26797	-1.22667	16.3051	0.00141923	0.345447	chr3L	16378973	16381570	-	protein_coding	CG4753
FBgn0030369	4.26266	-2.25784	6.11153	0.0331024	0.574257	chrX	12032631	12035283	+	protein_coding	Cyp318a1
FBgn0040510	4.2596	-1.75627	6.16365	0.0325127	0.574257	chr2L	12921090	12925453	+	protein_coding	ACXA
FBgn0083979	4.25925	-2.13398	10.4442	0.00905603	0.509333	chrX	11308532	11311208	-	protein_coding	Ir10a
FBgn0260474	4.25677	-1.93391	7.91794	0.0184433	0.540429	chr2R	9704383	9706147	+	protein_coding	CG30002
FBgn0031164	4.2499	-2.25876	7.06242	0.0241049	0.567203	chrX	21202498	21203341	-	protein_coding	CG1724
FBgn0262025	4.24834	-2.44212	5.96986	0.0347726	0.574257	chr3R	20139147	20139921	-	lincRNA	CR42836
FBgn0260776	4.24499	-1.86469	5.97975	0.0346528	0.574257	chr3L	15717818	15720073	+	protein_coding	CG42570
FBgn0039671	4.24478	-2.51408	5.64545	0.0390032	0.588168	chr3R	29588992	29589762	-	protein_coding	CG11470
FBgn0001077	4.23833	-2.19581	5.99255	0.0344983	0.574257	chr3R	6864323	6866244	+	protein_coding	ftz
FBgn0030926	4.23628	0.391146	16.6852	0.00130016	0.345447	chrX	18484486	18486921	-	protein_coding	psh
FBgn0086669	4.23555	-2.47383	6.77587	0.0264615	0.567203	chr2R	21327055	21327199	+	snoRNA	snoRNA:Psi18S-841a
FBgn0085462	4.23474	-2.47951	5.02289	0.0490443	0.606464	chr3R	30649960	30650858	+	protein_coding	CG34433
FBgn0266834	4.23413	-2.5595	5.26835	0.0447442	0.597437	chr2L	4256797	4257295	-	lincRNA	CR45296
FBgn0050293	4.22418	-0.562685	7.99004	0.0143304	0.532794	chr2R	21063177	21064986	-	protein_coding	Cht12
FBgn0034454	4.21284	-1.04066	20.3863	0.000586962	0.285818	chr2R	19497751	19500372	+	protein_coding	CG15120
FBgn0032602	4.20428	-1.44307	6.93594	0.0207037	0.548991	chr2L	16758183	16760554	-	protein_coding	ppk17
FBgn0038833	4.1965	-2.66248	7.29378	0.0308337	0.574257	chr3R	20847067	20847748	+	protein_coding	CG15696
FBgn0039202	4.1912	-2.01139	7.95888	0.0182155	0.540429	chr3R	24522477	24523678	-	protein_coding	CG13622
FBgn0267319	4.19113	-2.14325	9.36712	0.0121055	0.52379	chr3L	16177344	16177635	-	lincRNA	CR45755
FBgn0050385	4.18858	-2.49446	6.56239	0.0284015	0.573633	chr2R	7181325	7183020	+	protein_coding	CG30385
FBgn0040096	4.18831	-2.53455	9.32624	0.012244	0.52379	chr2L	11002071	11002738	+	protein_coding	lectin-33A
FBgn0264865	4.18752	-2.49305	8.12142	0.017344	0.539558	chr2L	21106804	21107306	-	lincRNA	CR44056
FBgn0262876	4.18423	-2.13454	7.44998	0.0213107	0.552725	chr2L	17704680	17706142	+	protein_coding	CG43231
FBgn0035926	4.18124	-2.66449	10.8084	0.0134943	0.532464	chr3L	8788143	8788545	-	protein_coding	CG5804
FBgn0040736	4.17928	-2.34347	9.30358	0.0123215	0.52379	chr2R	18387894	18388734	+	protein_coding	IM3
FBgn0030524	4.17927	-2.34272	13.4012	0.00442309	0.441862	chrX	13790337	13791111	-	protein_coding	CG10993
FBgn0039749	4.17548	3.98504	6.02034	0.0345491	0.574257	chr3R	30153021	30160473	-	protein_coding	CG11498
FBgn0265065	4.17258	-2.45803	11.0548	0.00774007	0.493903	chr3R	14421750	14422549	-	lincRNA	CR44176
FBgn0265912	4.17244	-2.34229	5.77811	0.0372009	0.582882	chr2L	9887038	9887389	+	lincRNA	CR44701
FBgn0031860	4.17219	-2.09785	8.18865	0.0169984	0.535623	chr2L	6803010	6804372	+	protein_coding	CG11236
FBgn0033374	4.1719	-1.91092	8.84584	0.0140243	0.532794	chr2R	9092505	9094658	-	protein_coding	CG13741
FBgn0036833	4.16913	-2.19834	5.63215	0.0391897	0.588168	chr3L	18920429	18922108	-	protein_coding	CG3819
FBgn0011957	4.1688	-2.14136	15.8553	0.00262096	0.405088	chr2R	6161534	6161607	+	tRNA	tRNA:R2:42Ac
FBgn0035429	4.16584	7.40547	5.6071	0.0399496	0.588168	chr3L	3280238	3290896	+	protein_coding	CG12017
FBgn0042711	4.16218	-2.20423	5.66101	0.0387863	0.588168	chr3R	26449078	26450585	+	protein_coding	Hex-t1
FBgn0083984	4.16136	-2.46635	7.7442	0.0194497	0.540667	chr3R	21877869	21878686	-	protein_coding	CG34148
FBgn0266349	4.16114	-2.50761	8.28257	0.0165294	0.535623	chrX	15334477	15335971	-	lincRNA	CR44998
FBgn0263611	4.16108	-2.42815	6.81764	0.026101	0.567203	chr2L	19978828	19979723	+	lincRNA	CR43620
FBgn0036568	4.16092	-1.98486	7.06649	0.0240734	0.567203	chr3L	16097833	16100088	+	protein_coding	ms(3)72Dt
FBgn0043025	4.15527	-0.845321	9.99538	0.00753704	0.493903	chr3L	17754935	17764158	-	protein_coding	Msi
FBgn0267612	4.15455	-2.55139	6.0702	0.0335793	0.574257	chr3R	24439866	24440510	-	lincRNA	CR45950
FBgn0052571	4.15048	-2.57921	9.62557	0.0112726	0.523316	chrX	16731090	16732630	+	protein_coding	TwdlX
FBgn0262484	4.14802	-2.31829	6.69756	0.0271537	0.567203	chr3L	3483831	3484653	-	protein_coding	CG43074
FBgn0263513	4.14771	-2.28755	7.71496	0.0196255	0.541698	chr3R	22774139	22774232	+	pre_miRNA	mir-4953
FBgn0083048	4.14295	-2.22612	6.73794	0.0267941	0.567203	chr3R	30207155	30207291	-	snoRNA	snoRNA:Psi18S-1377d
FBgn0039630	4.13955	-2.43684	6.8348	0.0259546	0.567203	chr3R	29054346	29055837	+	protein_coding	CG11843
FBgn0000061	4.13759	0.818651	8.98344	0.0112387	0.523316	chr2L	378111	387439	+	protein_coding	al
FBgn0037502	4.13359	-1.34867	6.2931	0.0311028	0.574257	chr3R	7420764	7423057	+	protein_coding	wa-cup
FBgn0030823	4.13222	-2.51203	8.10435	0.0174331	0.539558	chrX	17200725	17202598	-	protein_coding	CG8918
FBgn0052546	4.13219	-2.59421	9.83908	0.0106365	0.523153	chrX	18565763	18565835	+	tRNA	tRNA:CR32546
FBgn0050411	4.12555	-2.47519	7.70749	0.0196707	0.541698	chr2R	23415938	23417238	+	protein_coding	CG30411
FBgn0003023	4.12457	-2.55236	5.77029	0.0373043	0.582882	chrX	8485007	8489535	-	protein_coding	otu
FBgn0086673	4.11517	4.04768	10.7477	0.00855825	0.506271	chr2L	16804883	16816069	+	protein_coding	CG13272
FBgn0051015	4.11167	-2.555	5.80491	0.0368493	0.58261	chr3R	30646105	30648551	-	protein_coding	PH4alphaPV
FBgn0028855	4.09878	-2.33325	5.9746	0.0347152	0.574257	chr2L	14712470	14713298	+	protein_coding	CG15282
FBgn0265993	4.08943	-2.60171	6.34551	0.0305532	0.574257	chr2L	18732463	18733323	+	lincRNA	CR44768
FBgn0003401	4.08307	-0.725793	23.9061	0.000299197	0.240755	chr2R	23841460	23843286	-	protein_coding	shu
FBgn0035428	4.07641	2.41158	6.82564	0.0258803	0.567203	chr3L	3271035	3276255	+	protein_coding	CG14960
FBgn0085356	4.07085	1.914	8.23339	0.0159951	0.535623	chrX	17222967	17223815	-	protein_coding	CG34327
FBgn0038973	4.05804	-1.42075	11.3724	0.00502823	0.450463	chr3R	22466033	22466679	+	protein_coding	Pebp1
FBgn0038105	4.05167	-0.00433482	6.44226	0.0261173	0.567203	chr3R	12993394	12995147	-	protein_coding	yellow-f2
FBgn0035154	4.03143	0.805949	11.6831	0.00500872	0.450463	chr3L	685941	687958	-	protein_coding	CG3344
FBgn0262140	4.01179	-2.53141	5.97106	0.0347581	0.574257	chr2L	19961223	19961685	-	protein_coding	CG42866
FBgn0029816	4.01173	-2.45517	5.09553	0.0477207	0.601557	chrX	5845279	5846106	+	protein_coding	CG12729
FBgn0262588	4.01149	-2.49509	7.18473	0.0231773	0.562891	chr3R	28262734	28263622	-	protein_coding	CG43125
FBgn0267638	4.01109	-2.3742	6.34619	0.0305462	0.574257	chr3L	17696390	17696967	+	lincRNA	CR45976
FBgn0265099	4.01079	-1.97335	5.45853	0.0417281	0.590616	chr2R	7431695	7432496	-	lincRNA	CR44204
FBgn0266392	4.00586	-2.4636	5.10111	0.0476209	0.601557	chr2R	13673969	13674633	-	lincRNA	CR45032
FBgn0053667	4.00578	-2.58824	6.00543	0.0343437	0.574257	chrX	6471672	6472378	-	protein_coding	CG33667
FBgn0058182	4.00339	-2.57345	5.30107	0.0442067	0.595859	chr3R	2156915	2157206	-	pseudogene	CR40182
FBgn0037992	3.99557	8.4544	5.49459	0.0415965	0.590616	chr3R	12121582	12128201	-	protein_coding	CG4702
FBgn0266366	3.9825	-2.35454	5.74121	0.0376919	0.584657	chr2L	11836439	11836808	-	lincRNA	CR45014
FBgn0035328	3.98075	-2.6805	5.80516	0.0470837	0.601557	chr3L	2276549	2278038	+	protein_coding	yellow-g2
FBgn0040967	3.97873	-2.58144	5.47116	0.0415368	0.590616	chr2L	11034794	11035308	+	protein_coding	CG18666
FBgn0264553	3.9743	-2.39469	5.76221	0.0374115	0.582882	chr3L	3814697	3815240	-	lincRNA	CR43932
FBgn0266638	3.96801	-2.35538	5.78052	0.0371692	0.582882	chr2R	17040194	17043298	-	lincRNA	CR45145
FBgn0039307	3.96789	-2.28459	7.04695	0.0242254	0.567203	chr3R	25268660	25269965	+	pseudogene	CR13656
FBgn0033723	3.96585	-2.47326	4.98657	0.0497229	0.609009	chr2R	12379613	12380426	-	protein_coding	CG13155
FBgn0262569	3.96188	-2.62545	5.79559	0.0369712	0.582765	chr2R	18867847	18868167	-	protein_coding	CG43109
FBgn0037291	3.96019	-2.321	7.75408	0.0193906	0.540667	chr3R	4981998	4984232	-	protein_coding	CG14662
FBgn0031249	3.96006	-2.43275	5.25604	0.0449486	0.597869	chr2L	320278	321248	-	protein_coding	CG11911
FBgn0086600	3.95993	-2.34467	6.35052	0.0305013	0.574257	chr2R	18143178	18143324	+	snoRNA	snoRNA:Psi18S-1347c
FBgn0082989	3.95833	-2.46968	5.03928	0.0487416	0.605604	chr3R	5598637	5598777	-	snoRNA	snoRNA:Psi28S-2442a
FBgn0038714	3.95418	2.70735	17.8503	0.00145364	0.345447	chr3R	19597501	19598955	-	protein_coding	Cpr92A
FBgn0019940	3.94998	-2.5977	5.60613	0.0395577	0.588168	chr3R	15483157	15484699	+	protein_coding	Rh6
FBgn0029993	3.94946	-2.07638	7.58725	0.0204166	0.547927	chrX	8075876	8078240	+	protein_coding	CG1571
FBgn0030386	3.94788	-2.16079	8.29972	0.0164455	0.535623	chrX	12408860	12409825	+	protein_coding	CG2574
FBgn0033154	3.94572	3.53726	10.099	0.0100884	0.516564	chr2R	7258866	7261269	-	protein_coding	CG1850
FBgn0043532	3.94419	-2.47417	8.12379	0.0173316	0.539558	chr2R	19864716	19868714	+	protein_coding	Obp56i
FBgn0085476	3.94339	-2.5986	5.60613	0.0395578	0.588168	chr2L	2418421	2420013	-	protein_coding	CG34447
FBgn0051792	3.94294	-2.51198	5.80385	0.0368631	0.58261	chr2L	18997447	19002713	+	protein_coding	CG31792
FBgn0262331	3.93676	-2.28797	5.07569	0.0480777	0.603429	chr3R	21798226	21798331	-	pre_miRNA	mir-999
FBgn0267463	3.9363	-2.36229	6.49225	0.0290765	0.574257	chr3L	1549447	1549900	-	lincRNA	CR45813
FBgn0039434	3.92764	-2.59797	6.04038	0.0339287	0.574257	chr3R	26619117	26620224	+	protein_coding	TwdlM
FBgn0030370	3.91683	-2.1657	5.23753	0.045258	0.598531	chrX	12055337	12056635	-	protein_coding	Uch-L5R
FBgn0033359	3.91479	7.05235	6.78822	0.0266974	0.567203	chr2R	8969345	8985900	-	protein_coding	CG8213
FBgn0052106	3.91347	-2.36599	5.5002	0.0411009	0.590616	chr3L	12773950	12778716	-	protein_coding	CG32106
FBgn0265956	3.91209	-2.56014	5.29007	0.0443866	0.595859	chr2L	5287446	5288667	-	lincRNA	CR44743
FBgn0013809	3.91127	-1.23372	13.812	0.00260495	0.405088	chrX	18064482	18078472	+	protein_coding	Dhc16F
FBgn0011653	3.90916	5.19439	7.81671	0.0193158	0.540667	chr3L	4161665	4167464	-	protein_coding	mas
FBgn0263109	3.90491	5.62198	13.3606	0.00459082	0.445704	chr2R	5893894	5931363	+	protein_coding	CG43366
FBgn0039852	3.90366	6.01952	8.93332	0.0139257	0.532794	chr3R	31543031	31566165	+	protein_coding	nyo
FBgn0029702	3.90358	-0.959035	8.10621	0.0137799	0.532794	chrX	4268700	4271083	+	protein_coding	CG15572
FBgn0051010	3.87531	-1.06382	8.1032	0.0137938	0.532794	chr3R	30704761	30706121	-	protein_coding	CG31010
FBgn0028868	3.85357	-1.02897	6.11171	0.0280866	0.572221	chr2L	14765907	14767225	+	protein_coding	CG4701
FBgn0265313	3.84353	-0.726961	15.6715	0.00164704	0.345447	chr2R	9138485	9141981	+	protein_coding	CG44286
FBgn0031548	3.83515	-0.54903	11.4279	0.00494953	0.450463	chr2L	3525130	3527588	+	protein_coding	CG8852
FBgn0053012	3.81706	-1.56314	8.25859	0.0130948	0.527811	chr2R	12367352	12370886	+	protein_coding	CG33012
FBgn0035512	3.81452	3.00847	10.5039	0.00874774	0.506271	chr3L	4211963	4212915	-	protein_coding	Cpr64Ac
FBgn0034661	3.81359	6.26077	5.57792	0.0403689	0.588168	chr2R	21799329	21800904	-	protein_coding	CG4386
FBgn0263506	3.80402	-2.24713	5.18681	0.0461192	0.600409	chrX	4873999	4874382	-	lincRNA	CR43495
FBgn0267565	3.79728	-2.6168	5.63696	0.0391221	0.588168	chr3R	6836665	6837608	+	lincRNA	CR45905
FBgn0004511	3.78908	6.61737	7.57096	0.0208256	0.548991	chrX	11769768	11778784	-	protein_coding	dy
FBgn0040972	3.7885	-2.66396	6.2699	0.0313499	0.574257	chr2L	13143213	13143622	-	protein_coding	CG16978
FBgn0265596	3.78755	-2.57411	5.1787	0.0462588	0.600782	chrX	15636307	15637014	+	lincRNA	CR44423
FBgn0036492	3.78671	-2.49173	5.6794	0.038532	0.588168	chr3L	15300914	15302785	-	protein_coding	Best3
FBgn0262816	3.78496	-2.51111	5.12013	0.0472824	0.601557	chr2R	16380515	16385765	+	protein_coding	CG43187
FBgn0085336	3.78487	-2.63522	6.49378	0.0290615	0.574257	chr3R	11897581	11898419	+	protein_coding	CG34307
FBgn0052551	3.78434	-2.63444	5.13056	0.0470981	0.601557	chrX	18438867	18439260	+	protein_coding	CG32551
FBgn0267560	3.779	-2.75902	5.77139	0.0475699	0.601557	chr3R	6858838	6859192	-	lincRNA	CR45900
FBgn0264510	3.77811	-2.32148	7.16436	0.0233288	0.563584	chr2R	12594391	12595649	-	lincRNA	CR43909
FBgn0262616	3.77709	-2.57663	5.22668	0.0454406	0.599468	chr2L	6972242	6972796	+	pseudogene	CR43142
FBgn0264999	3.77672	-2.39262	5.40207	0.0425966	0.592232	chr2L	9669639	9671070	-	lincRNA	CR44150
FBgn0050468	3.77671	-2.5388	4.9727	0.049985	0.609009	chr2R	15504200	15506000	+	protein_coding	Ir52c
FBgn0265885	3.76973	-2.71183	6.43079	0.0296841	0.574257	chr3L	18707932	18708692	+	lincRNA	CR44674
FBgn0265196	3.76806	-2.36028	5.08087	0.0479841	0.602754	chr3R	17371270	17371757	-	lincRNA	CR44256
FBgn0265468	3.76786	-2.59343	5.90467	0.0355758	0.578285	chr3L	11315298	11316397	+	lincRNA	CR44361
FBgn0266275	3.76735	-2.68368	8.59841	0.0150636	0.535623	chrX	15082615	15083753	-	lincRNA	CR44960
FBgn0263581	3.76045	-2.32624	10.5571	0.00879331	0.506271	chr2L	20316004	20317623	-	lincRNA	CR43606
FBgn0011859	3.75815	-2.63952	5.79559	0.0369712	0.582765	chr2L	1938088	1938159	-	tRNA	tRNA:G3:22BCa
FBgn0266895	3.75789	-2.68298	5.64553	0.039002	0.588168	chr2L	16534961	16535228	-	lincRNA	CR45355
FBgn0082925	3.7548	-2.15702	6.33329	0.0306803	0.574257	chr2R	22607543	22607678	+	snoRNA	snoRNA:Or-aca1
FBgn0266052	3.75159	-2.51156	5.95468	0.0349576	0.574257	chrX	6637122	6637548	+	lincRNA	CR44817
FBgn0267709	3.75082	-2.63873	6.1166	0.0330445	0.574257	chr3R	19941996	19942403	-	lincRNA	CR46042
FBgn0262393	3.75054	-2.68432	6.06686	0.0336183	0.574257	chr3L	19797960	19798059	+	pre_miRNA	mir-33
FBgn0051259	3.7505	-2.51743	5.19619	0.0459584	0.600409	chr3R	8523943	8526667	+	protein_coding	CG31259
FBgn0051343	3.7497	-2.73103	8.29253	0.0238627	0.56547	chr3R	21745265	21749003	+	protein_coding	CG31343
FBgn0038942	3.74917	-2.73105	5.60989	0.0499879	0.609009	chr3R	22331990	22332559	+	protein_coding	CG13862
FBgn0039376	3.74357	-1.78394	8.17896	0.0170476	0.535623	chr3R	25815478	25816574	+	protein_coding	CG14354
FBgn0086044	3.74259	-2.44025	5.95627	0.0349383	0.574257	chrX	9929888	9930006	-	snoRNA	snoRNA:Me28S-U1688
FBgn0052301	3.74186	-2.63973	7.54646	0.0206775	0.548991	chr3L	2244477	2248614	+	protein_coding	CG32301
FBgn0038656	3.73931	-2.10612	5.04014	0.0487258	0.605604	chr3R	18901662	18902264	-	protein_coding	CG14294
FBgn0028583	3.73311	-2.68631	5.67942	0.0385317	0.588168	chrX	21396726	21397316	-	protein_coding	lcs
FBgn0039833	3.73093	-1.22843	6.61128	0.0233012	0.563584	chr3R	31232414	31235362	-	protein_coding	CG15564
FBgn0264899	3.72963	-2.58088	5.11846	0.0473121	0.601557	chr3R	17433990	17434430	-	protein_coding	CG44090
FBgn0052027	3.72608	-1.04436	9.06638	0.010064	0.516564	chr3L	18841578	18842786	+	lincRNA	CR32027
FBgn0035193	3.72428	-1.00852	10.3698	0.00673346	0.485888	chr3L	1237132	1238319	-	protein_coding	CG9192
FBgn0034670	3.71787	-2.3662	5.10065	0.0476291	0.601557	chr2R	21951591	21952562	+	protein_coding	CG13488
FBgn0038676	3.71486	5.86183	8.54935	0.0155435	0.535623	chr3R	19033537	19044693	+	protein_coding	CG6026
FBgn0036617	3.69658	4.97709	5.9173	0.0358073	0.579265	chr3L	16362602	16363750	+	protein_coding	Cpr72Ea
FBgn0002577	3.67986	6.67832	6.71683	0.0273281	0.567203	chrX	11754272	11769508	+	protein_coding	m
FBgn0015037	3.66242	3.65754	36.7085	6.17e-05	0.130308	chr2R	9240040	9242139	+	protein_coding	Cyp4p1
FBgn0005613	3.6602	0.701208	15.5834	0.00168194	0.345447	chr2R	14201389	14212413	-	protein_coding	Sox15
FBgn0031410	3.64555	-1.26558	5.46492	0.0361161	0.581154	chr2L	2288502	2289416	-	protein_coding	CG17237
FBgn0023496	3.64434	-0.73155	8.04023	0.0140894	0.532794	chr2L	10699407	10701544	-	protein_coding	Lip1
FBgn0052191	3.63137	-1.28683	12.4872	0.00369088	0.432923	chr3L	17806450	17809146	-	protein_coding	CG32191
FBgn0039481	3.6048	4.06966	14.8367	0.00325901	0.428994	chr3R	27089703	27091130	-	protein_coding	Cpr97Eb
FBgn0030339	3.59226	0.122208	6.32618	0.0271146	0.567203	chrX	11839607	11841503	+	protein_coding	Cyp28c1
FBgn0032535	3.58772	-0.597527	7.27426	0.0183508	0.540429	chr2L	13909332	13911719	+	protein_coding	Ance-2
FBgn0037664	3.58277	6.54388	7.81957	0.019299	0.540667	chr3R	9246648	9251431	+	protein_coding	CG8420
FBgn0000451	3.58268	9.03277	5.04595	0.0490555	0.606464	chr3L	10190275	10201837	-	protein_coding	ect
FBgn0035043	3.5761	-1.71227	15.4625	0.00173127	0.345447	chr2R	24640682	24642239	-	protein_coding	CG4781
FBgn0037409	3.57464	5.12714	6.21925	0.0322704	0.574257	chr3R	6198810	6207678	+	protein_coding	Osi24
FBgn0028878	3.56364	-2.68039	5.70835	0.0381357	0.587905	chr2L	15109404	15113092	+	protein_coding	CG15269
FBgn0033395	3.55962	4.98514	15.1898	0.00305186	0.428994	chr2R	9237511	9239831	+	protein_coding	Cyp4p2
FBgn0030921	3.55508	-2.507	5.12432	0.0472082	0.601557	chrX	18437489	18438233	+	protein_coding	CG6290
FBgn0266935	3.55501	-1.06168	5.40268	0.0425873	0.592232	chr3L	19090582	19090975	+	lincRNA	CR45386
FBgn0267647	3.55468	-2.47326	5.33683	0.0436282	0.593893	chr3L	5142519	5142780	-	lincRNA	CR45985
FBgn0264957	3.55434	-2.54908	5.48777	0.0412867	0.590616	chr2R	5937399	5938994	+	lincRNA	CR44126
FBgn0034328	3.55395	-2.63645	5.18882	0.0460848	0.600409	chr2R	18382703	18383235	-	protein_coding	IM23
FBgn0265176	3.55352	-2.72649	5.56256	0.0401838	0.588168	chr2R	15294594	15295088	-	lincRNA	CR44241
FBgn0043854	3.54555	-2.55275	5.59002	0.0397878	0.588168	chr2L	6372387	6377284	+	protein_coding	slam
FBgn0263235	3.54459	-2.63702	8.55248	0.0152666	0.535623	chr2L	12111109	12112256	+	protein_coding	Phae2
FBgn0032125	3.54172	2.04461	6.62747	0.0269285	0.567203	chr2L	9542877	9543658	+	protein_coding	Cpr30B
FBgn0031940	3.53609	6.23237	22.4236	0.000790675	0.308521	chr2L	7743681	7744839	-	protein_coding	CG7214
FBgn0035279	3.53587	-2.39858	6.6242	0.0278225	0.570052	chr3L	1824128	1831783	-	protein_coding	Cpr62Ba
FBgn0085599	3.53586	-2.40008	6.67906	0.0273205	0.567203	chr3L	26298454	26305572	-	protein_coding	CG41284
FBgn0266860	3.53544	-2.59461	5.95058	0.0350079	0.574257	chr2R	9445443	9445794	-	lincRNA	CR45321
FBgn0265349	3.53472	-2.72849	7.27646	0.0225101	0.556514	chr2L	11837242	11837486	+	protein_coding	Sfp33A4
FBgn0038073	3.53455	3.51402	7.85775	0.0190276	0.540624	chr3R	12662830	12673959	+	protein_coding	CG14395
FBgn0052548	3.5308	1.80908	6.86506	0.0245101	0.567203	chrX	18435718	18440581	-	protein_coding	CG32548
FBgn0032665	3.52783	-2.75787	5.46144	0.0416839	0.590616	chr2L	18114546	18115220	+	protein_coding	CG15152
FBgn0085288	3.52783	-2.75745	5.43556	0.0420788	0.591612	chr3L	2026990	2028326	+	protein_coding	CG34259
FBgn0003374	3.52783	-2.75745	5.43556	0.0420788	0.591612	chrX	3250088	3251040	+	protein_coding	Sgs4
FBgn0083054	3.52711	-2.39411	6.21294	0.0319668	0.574257	chr2R	18142801	18142938	+	snoRNA	snoRNA:Psi18S-1347a
FBgn0263399	3.52691	-2.43362	6.58514	0.0281867	0.572836	chr3R	17911375	17912045	+	protein_coding	CG43445
FBgn0029995	3.52621	-2.35866	6.32344	0.0307831	0.574257	chrX	8084017	8087213	-	protein_coding	CG2256
FBgn0052266	3.52413	-1.39301	7.98553	0.0143522	0.532794	chr3L	3790803	3791560	+	protein_coding	CG32266
FBgn0003319	3.52086	3.34722	8.27822	0.0166191	0.535623	chr3R	16116160	16145284	+	protein_coding	Sb
FBgn0035234	3.51876	6.08094	18.2442	0.00168025	0.345447	chr3L	1565391	1567802	+	protein_coding	CG12003
FBgn0263462	3.51656	-2.51565	9.22368	0.0125999	0.52379	chr2R	16857412	16857578	+	snoRNA	snoRNA:Dek-a
FBgn0266182	3.51641	-2.71145	5.57092	0.0400628	0.588168	chrX	15497522	15497862	-	lincRNA	CR44888
FBgn0263114	3.5164	-2.7103	5.51068	0.040945	0.590616	chr2R	17034044	17034609	-	protein_coding	CG43371
FBgn0050098	3.51602	-2.51568	6.97959	0.0247588	0.567203	chr2R	16354223	16355215	-	protein_coding	CG30098
FBgn0036607	3.51474	-2.73094	5.61638	0.0394122	0.588168	chr3L	16323671	16324308	+	protein_coding	CG13059
FBgn0002629	3.51473	-2.73207	5.68811	0.0384122	0.588168	chr3R	26023820	26024579	-	protein_coding	E(spl)m4-BFM
FBgn0016036	3.51094	-2.27303	5.64825	0.0389641	0.588168	chr3L	7244387	7245383	+	protein_coding	mei-P22
FBgn0266951	3.50853	-2.23345	5.39374	0.0427267	0.592232	chr3L	125420	125833	+	lincRNA	CR45402
FBgn0085318	3.50612	-2.68634	5.41044	0.0424665	0.592232	chr3R	23506907	23507476	-	protein_coding	CG34289
FBgn0033369	3.50389	-1.42635	5.2287	0.0397062	0.588168	chr2R	9060460	9061924	-	protein_coding	CG8197
FBgn0037517	3.50318	-1.48607	4.92767	0.0449132	0.597869	chr3R	7790632	7793483	+	protein_coding	CG10086
FBgn0032554	3.49303	-2.10492	5.05169	0.0485141	0.60541	chr2L	14874375	14876333	-	protein_coding	CG15278
FBgn0266615	3.49109	-2.46079	5.45317	0.0418096	0.590616	chr3R	13044156	13044529	+	protein_coding	CG45122
FBgn0033658	3.48656	-1.64562	7.11102	0.0194446	0.540667	chr2R	11862536	11863252	-	protein_coding	TwdlBeta
FBgn0013772	3.46988	-1.24009	11.8948	0.00434159	0.441862	chr2R	14887170	14889010	-	protein_coding	Cyp6a8
FBgn0032287	3.46737	-1.48383	11.9245	0.00430597	0.441862	chr2L	10703620	10704930	+	protein_coding	CG6415
FBgn0039787	3.45778	-1.87941	6.52631	0.024043	0.567203	chr3R	30579428	30582117	+	protein_coding	CG9702
FBgn0052396	3.44955	-0.670113	12.0636	0.0041435	0.441862	chr3L	6530728	6532429	+	protein_coding	CG32396
FBgn0051876	3.43688	1.97828	7.40398	0.0205142	0.548411	chr2L	9932271	9933163	-	protein_coding	Cpr30F
FBgn0050062	3.43508	-1.12576	14.4674	0.00220776	0.38766	chr2R	13445699	13446309	-	protein_coding	CG30062
FBgn0032483	3.43423	-1.58521	11.954	0.00427088	0.441862	chr2L	13210772	13211814	-	protein_coding	CG15482
FBgn0259101	3.42957	1.19474	8.63111	0.0126576	0.52379	chrX	11096272	11108148	+	protein_coding	CG42249
FBgn0038210	3.42002	-1.32971	5.16518	0.0407427	0.590152	chr3R	14162708	14163625	+	protein_coding	CG3199
FBgn0035982	3.41938	-0.0483444	17.4974	0.00108241	0.344605	chr3L	9375429	9376293	+	protein_coding	CG4461
FBgn0051693	3.40705	-1.61009	4.9206	0.0450449	0.598056	chr2L	22015189	22017334	+	protein_coding	CG31693
FBgn0035873	3.36625	-0.990443	5.76436	0.0321018	0.574257	chr3L	8320762	8322280	+	protein_coding	CG13670
FBgn0085813	3.34802	2.92296	13.7521	0.00361982	0.432923	chrX	23211191	23213166	+	pseudogene	18SrRNA-Psi:CR41602
FBgn0040104	3.346	-1.0495	10.1421	0.00720954	0.490811	chr2L	3716799	3717773	-	protein_coding	lectin-24A
FBgn0034007	3.34579	-1.58025	11.0078	0.00558268	0.464122	chr2R	15296763	15298329	-	protein_coding	CG8102
FBgn0085298	3.34287	-1.29968	13.9106	0.00254022	0.405088	chr3L	528336	528996	+	protein_coding	CG34269
FBgn0036602	3.33747	5.11274	9.62097	0.0115098	0.52379	chr3L	16307845	16308480	-	protein_coding	CG13042
FBgn0038281	3.31963	-1.43028	4.7039	0.0493138	0.607834	chr3R	15037365	15038149	+	protein_coding	RpL10Aa
FBgn0053329	3.28455	-1.91331	8.00808	0.0142432	0.532794	chr3R	14222073	14224155	-	protein_coding	Sp212
FBgn0032260	3.27693	0.574622	10.2287	0.00707041	0.489324	chr2L	10489899	10491454	-	protein_coding	CG13144
FBgn0035019	3.26685	-2.26081	5.40555	0.0425425	0.592232	chr2R	24529553	24531272	-	protein_coding	Ir60e
FBgn0031564	3.26645	-1.0873	8.28636	0.0129743	0.524921	chr2L	3703658	3704253	+	protein_coding	CG2816
FBgn0267715	3.2659	-2.47053	6.93786	0.0250964	0.567203	chr3L	19294726	19295198	-	lincRNA	CR46048
FBgn0263339	3.26502	-2.68074	5.59154	0.039766	0.588168	chr2L	17893811	17894734	+	lincRNA	CR43420
FBgn0085360	3.26409	-0.884403	10.3285	0.00681702	0.487144	chrX	20122452	20125271	+	protein_coding	CG34331
FBgn0034499	3.26333	2.6539	21.4425	0.000605068	0.285818	chr2R	20288370	20291945	-	protein_coding	Cpr56F
FBgn0039728	3.26195	5.22699	6.31006	0.0312914	0.574257	chr3R	29983425	29990785	+	protein_coding	CG7896
FBgn0052651	3.25681	-1.61071	4.68427	0.0497238	0.609009	chrX	12404615	12408477	-	protein_coding	CG32651
FBgn0029828	3.2552	-2.36384	8.13225	0.0172877	0.539558	chrX	5955628	5958283	+	protein_coding	CG6067
FBgn0267452	3.25433	-2.68285	5.66309	0.0387575	0.588168	chr3L	2118497	2119567	+	lincRNA	CR45802
FBgn0053117	3.2541	-2.72971	5.11272	0.0474139	0.601557	chr2L	19912937	19913516	-	protein_coding	Victoria
FBgn0265720	3.25387	-2.77662	4.97713	0.0499012	0.609009	chr3L	8751233	8751669	-	lincRNA	CR44527
FBgn0265746	3.25386	-2.77818	5.06785	0.0482197	0.604018	chr3L	12658902	12660095	+	lincRNA	CR44553
FBgn0039521	3.25376	-2.68348	5.69882	0.0382655	0.588168	chr3R	27502089	27502956	-	protein_coding	CG5402
FBgn0082919	3.25375	-2.68592	5.83535	0.0364549	0.581154	chr2R	14624252	14624330	+	snoRNA	snoRNA:Or-CD4
FBgn0263037	3.25353	-2.72974	6.46049	0.0293886	0.574257	chr2L	14161143	14163222	-	protein_coding	CG43332
FBgn0033303	3.25327	-2.82702	6.61893	0.0371053	0.582765	chr2R	8569136	8570306	+	pseudogene	Cyp6a15Psi
FBgn0035308	3.25183	4.69242	7.45098	0.0216148	0.553995	chr3L	2153200	2163863	-	protein_coding	CG15822
FBgn0031209	3.24589	-2.22552	7.18537	0.0231726	0.562891	chr2L	21822	25155	-	protein_coding	Ir21a
FBgn0040360	3.24371	2.45885	8.36825	0.0152353	0.535623	chrX	1184777	1188585	+	protein_coding	CG14626
FBgn0052447	3.24322	4.16905	10.4092	0.00931122	0.509333	chr3L	21690611	21706365	-	protein_coding	CG32447
FBgn0051702	3.24254	-2.77942	6.42844	0.0297077	0.574257	chr2L	22071143	22072902	+	protein_coding	CG31702
FBgn0267445	3.24252	-2.82804	6.66775	0.0365986	0.582091	chrY	1003208	1004639	-	lincRNA	Su(Ste):CR45795
FBgn0267549	3.23821	-2.04946	5.14936	0.0467682	0.601557	chr3L	16042394	16042968	+	lincRNA	CR45889
FBgn0027107	3.23123	-2.77868	4.99477	0.0495686	0.609009	chrX	20267820	20269769	-	protein_coding	Inx6
FBgn0261803	3.22536	1.37797	8.17381	0.0146861	0.532794	chrX	5296065	5306288	+	protein_coding	CG42749
FBgn0035510	3.21699	3.7845	17.983	0.00157248	0.345447	chr3L	4207837	4209178	-	protein_coding	Cpr64Aa
FBgn0036879	3.20717	-0.549246	6.21796	0.0269787	0.567203	chr3L	19519648	19520419	+	protein_coding	Cpr76Bb
FBgn0032167	3.19664	-0.929012	16.0895	0.00149238	0.345447	chr2L	9940772	9947648	-	protein_coding	CG5853
FBgn0069056	3.19002	-1.56482	7.77285	0.0154301	0.535623	chr2R	21538249	21539293	-	protein_coding	CG33226
FBgn0250815	3.18616	-1.5476	10.3697	0.00923426	0.509333	chr3L	6039154	6040135	+	protein_coding	Jon65Aiv
FBgn0034460	3.18298	-0.992798	4.83943	0.0465904	0.601557	chr2R	19636659	19637400	+	protein_coding	CG18367
FBgn0032981	3.17526	-0.761759	12.8184	0.00337671	0.430518	chr2L	22175414	22183991	+	protein_coding	CG3635
FBgn0036329	3.17	-1.30594	9.00376	0.0102673	0.516564	chr3L	12995134	12997418	+	protein_coding	CG11262
FBgn0000551	3.16816	0.194562	19.6782	0.000678297	0.291627	chr3L	21296762	21297803	-	protein_coding	Edg78E
FBgn0032414	3.16587	4.1587	6.22506	0.0322067	0.574257	chr2L	12114359	12129896	+	protein_coding	CG17211
FBgn0262721	3.16494	-2.34454	6.01371	0.0349898	0.574257	chr2L	3694430	3695020	-	protein_coding	CG43165
FBgn0051245	3.16084	-1.32212	6.12328	0.0279633	0.571184	chr3R	19376194	19377225	-	protein_coding	CG31245
FBgn0038134	3.16066	-0.233486	6.35708	0.0256049	0.567203	chr3R	13292051	13293198	-	protein_coding	wntD
FBgn0259140	3.15665	-0.188674	17.9795	0.000973233	0.341003	chr3L	11801950	11814755	-	protein_coding	CG42255
FBgn0259926	3.14927	7.00835	9.08854	0.0133303	0.530762	chrX	5683239	5684456	+	protein_coding	CG42449
FBgn0021742	3.14449	3.82597	7.4962	0.0213014	0.552725	chrX	10964031	10967134	-	protein_coding	C901
FBgn0002962	3.14422	-2.14599	6.05085	0.0349898	0.574257	chr3R	19157237	19160202	+	protein_coding	nos
FBgn0016076	3.14179	5.55577	8.42446	0.0161184	0.535623	chr2L	5288943	5311223	+	protein_coding	vri
FBgn0026320	3.13548	-0.320977	5.52661	0.0352427	0.574257	chr3L	14969343	14970306	+	protein_coding	Tom
FBgn0035513	3.13185	-0.379979	19.4973	0.000704209	0.291627	chr3L	4215378	4216414	+	protein_coding	Cpr64Ad
FBgn0033873	3.13153	0.764038	7.51206	0.0177849	0.540429	chr2R	13833574	13835096	-	protein_coding	CG6337
FBgn0266725	3.13017	-1.32558	7.69564	0.0158447	0.535623	chr4	175454	175874	+	lincRNA	CR45198
FBgn0030826	3.12691	2.40113	6.03022	0.0333727	0.574257	chrX	17209367	17209997	-	protein_coding	CG12995
FBgn0039704	3.12287	6.01454	6.23895	0.0320548	0.574257	chr3R	29819130	29825800	+	protein_coding	neo
FBgn0030852	3.12281	-1.40738	13.4224	0.00288022	0.424636	chrX	17629790	17632047	-	protein_coding	CG8316
FBgn0053458	3.11954	-1.76913	11.6596	0.00463632	0.445704	chr2R	16486673	16487801	+	protein_coding	CG33458
FBgn0014865	3.11423	-1.18435	6.28918	0.0262648	0.567203	chr2R	15408845	15409113	+	protein_coding	Mtk
FBgn0004360	3.10526	1.6524	11.2789	0.00567175	0.464944	chr2R	9494165	9503188	+	protein_coding	Wnt2
FBgn0036881	3.09647	5.23049	6.04839	0.0342161	0.574257	chr3L	19532742	19538289	+	protein_coding	Cpr76Bd
FBgn0003382	3.08753	4.87525	8.31972	0.0166206	0.535623	chr2R	11324313	11336463	+	protein_coding	sha
FBgn0035587	3.08703	-0.913619	23.7981	0.000305135	0.240755	chr3L	5141952	5144317	+	protein_coding	CG4623
FBgn0267574	3.08503	-1.20675	12.8492	0.00334914	0.430518	chr3R	13466494	13466722	+	lincRNA	CR45914
FBgn0029697	3.08375	-2.09844	7.5575	0.0166194	0.535623	chrX	4218169	4223331	+	protein_coding	CG15570
FBgn0086368	3.07274	4.63779	6.84629	0.0261974	0.567203	chrX	784745	788215	+	protein_coding	tw
FBgn0266088	3.06752	-2.00456	5.1075	0.0417117	0.590616	chr2R	24955776	24957359	-	lincRNA	CR44830
FBgn0030077	3.06718	3.8157	7.34683	0.0223074	0.556514	chrX	9054697	9067983	-	protein_coding	CG15365
FBgn0085227	3.06475	-1.90708	6.31155	0.0260451	0.567203	chr2R	19682445	19682977	-	protein_coding	CG34198
FBgn0031918	3.05846	6.95676	5.97352	0.035114	0.574257	chr2L	7466542	7472493	+	protein_coding	CG6055
FBgn0266766	3.05823	-1.653	8.77178	0.0110633	0.523316	chr2R	19784293	19789736	+	lincRNA	CR45231
FBgn0031879	3.05269	7.66185	14.295	0.00349589	0.431917	chr2L	6972827	7010359	-	protein_coding	uif
FBgn0032424	3.0504	-1.2268	5.70687	0.0328299	0.574257	chr2L	12356440	12357906	+	protein_coding	CG17010
FBgn0029968	3.04922	-1.22883	7.18668	0.0189284	0.540429	chrX	7884659	7886976	+	protein_coding	Ir7g
FBgn0033860	3.0457	-0.916149	6.1623	0.0275525	0.569318	chr2R	13596676	13598750	+	protein_coding	S-Lap5
FBgn0261529	3.02174	-1.65385	5.09397	0.041943	0.591548	chr2L	14328428	14333860	+	protein_coding	ms(2)34Fe
FBgn0052745	3.02144	1.93743	12.5502	0.00406656	0.441862	chrX	6280232	6280752	-	pseudogene	CR32745
FBgn0039078	3.01293	3.40123	11.245	0.00702465	0.489324	chr3R	23408683	23472278	-	protein_coding	CG4374
FBgn0038273	3.01271	0.560536	6.02815	0.0298932	0.574257	chr3R	14894783	14896446	+	protein_coding	CG14860
FBgn0002939	3.00489	0.0471794	18.0364	0.000961208	0.341003	chr2L	18081627	18083608	+	protein_coding	ninaD
FBgn0053225	3.00165	-1.39147	11.8415	0.00440638	0.441862	chr2R	21590274	21591584	+	protein_coding	CG33225
FBgn0037427	2.99212	4.95724	5.44386	0.0423662	0.592232	chr3R	6311771	6327308	+	protein_coding	Osi17
FBgn0037067	2.99209	-1.61845	5.19844	0.0401961	0.588168	chr3L	21291859	21292800	-	protein_coding	Cpr78Ca
FBgn0050288	2.98618	-1.0415	7.74181	0.0155952	0.535623	chr2R	21519242	21520393	-	protein_coding	CG30288
FBgn0035384	2.98588	-0.976641	6.25212	0.0266335	0.567203	chr3L	2995171	2996155	+	protein_coding	CG2113
FBgn0034121	2.98502	0.357962	8.5692	0.0118179	0.52379	chr2R	16359729	16363524	+	protein_coding	CG6262
FBgn0031468	2.98174	-0.57108	8.23132	0.0132145	0.528549	chr2L	2840123	2842638	+	protein_coding	CG2975
FBgn0051198	2.97383	-1.31384	4.91782	0.0450968	0.598077	chr3R	21754323	21757758	+	protein_coding	CG31198
FBgn0036738	2.96628	-1.43616	8.63482	0.011567	0.52379	chr3L	17549825	17550980	+	protein_coding	CG7542
FBgn0038258	2.96084	-1.26655	9.90772	0.00774098	0.493903	chr3R	14751747	14754460	-	protein_coding	CG7362
FBgn0010482	2.95258	4.21533	40.2263	4.64e-05	0.119819	chr2R	6721100	6740672	-	protein_coding	l(2)01289
FBgn0051788	2.94546	-0.0768234	6.35916	0.0255849	0.567203	chr2L	18257493	18257978	-	protein_coding	CG31788
FBgn0033307	2.9427	5.59937	11.736	0.00668497	0.485047	chr2R	8590496	8591948	+	protein_coding	CG14752
FBgn0030592	2.9419	1.77889	17.9529	0.000990441	0.341003	chrX	14885951	14896891	-	protein_coding	CG9514
FBgn0034833	2.93894	-1.21668	7.10877	0.0194602	0.540667	chr2R	23183976	23185288	+	protein_coding	CG13539
FBgn0035309	2.93419	-1.90695	7.85492	0.0150034	0.535623	chr3L	2167549	2169108	-	protein_coding	CG15879
FBgn0013812	2.93338	0.332045	23.0151	0.000352505	0.257901	chr3R	21024579	21042499	-	protein_coding	Dhc93AB
FBgn0033130	2.93043	-1.14001	7.64594	0.0161184	0.535623	chr2R	7035124	7036949	+	protein_coding	Tsp42Ei
FBgn0051525	2.92815	-0.933693	19.7085	0.000674072	0.291627	chr3R	4427029	4428200	+	protein_coding	CG31525
FBgn0032381	2.90684	-1.3346	6.43258	0.0248938	0.567203	chr2L	11847225	11849169	+	protein_coding	Mal-B1
FBgn0029866	2.90528	4.58785	6.29752	0.0314244	0.574257	chrX	6337761	6343731	+	protein_coding	CG3842
FBgn0040368	2.89938	-1.46938	6.01686	0.0291211	0.574257	chrX	1158598	1162389	-	protein_coding	eIF4E-7
FBgn0038798	2.89924	-2.82827	5.3791	0.0429564	0.593627	chr3R	20504787	20506186	+	protein_coding	Or92a
FBgn0040649	2.89105	-1.3578	8.42936	0.0123739	0.52379	chrX	20486179	20486588	+	protein_coding	CG15461
FBgn0267723	2.88877	-2.3274	5.83186	0.0364999	0.581154	chr3R	21638651	21639088	+	lincRNA	CR46056
FBgn0038439	2.88803	5.11398	13.206	0.00468338	0.446376	chr3R	16484565	16495422	-	protein_coding	Cad89D
FBgn0051327	2.88245	-1.03302	5.25785	0.0392411	0.588168	chr3R	14157559	14160278	-	protein_coding	CG31327
FBgn0031644	2.88039	-1.41613	5.06635	0.0424198	0.592232	chr2L	4889994	4891277	+	protein_coding	CG15625
FBgn0004577	2.87944	4.25333	7.41011	0.021892	0.553995	chr3R	17014575	17027987	+	protein_coding	Pxd
FBgn0034717	2.86299	-1.91051	4.76866	0.0479896	0.602754	chr2R	22293399	22296955	+	protein_coding	CG5819
FBgn0034391	2.86228	7.37821	6.73849	0.0271349	0.567203	chr2R	18783298	18794594	+	protein_coding	CG15080
FBgn0034183	2.8598	-0.0840349	13.8212	0.00259881	0.405088	chr2R	17046838	17048794	+	protein_coding	CG9642
FBgn0038074	2.85491	-1.80042	7.50316	0.0169362	0.535623	chr3R	12674607	12676084	+	protein_coding	Gnmt
FBgn0031001	2.85062	4.02423	5.503	0.0414705	0.590616	chrX	19220621	19235910	+	protein_coding	CG7884
FBgn0035553	2.84538	0.877846	8.03453	0.0145154	0.532794	chr3L	4485158	4490963	-	protein_coding	CG13722
FBgn0034837	2.84386	-1.58255	5.01589	0.0433075	0.593627	chr2R	23246609	23247893	-	protein_coding	RpL22-like
FBgn0039527	2.84042	6.56181	5.49288	0.041622	0.590616	chr3R	27586473	27596130	-	protein_coding	CG5639
FBgn0038348	2.83146	2.82537	5.90919	0.0349243	0.574257	chr3R	15537712	15542414	-	protein_coding	AOX2
FBgn0028941	2.8295	-1.36915	5.61096	0.0340885	0.574257	chr2L	13542267	13543633	+	protein_coding	CG16853
FBgn0033027	2.82753	3.40455	14.422	0.0031057	0.428994	chr2R	5503436	5507866	-	protein_coding	TpnC4
FBgn0033515	2.81086	-1.15338	5.48516	0.0358267	0.579265	chr2R	10377127	10380109	-	protein_coding	Ir47a
FBgn0010383	2.80851	3.36545	6.87507	0.0255209	0.567203	chrX	18688537	18693042	-	protein_coding	Cyp18a1
FBgn0265668	2.79722	-1.22571	4.79125	0.0475376	0.601557	chr2L	15882782	15883190	-	protein_coding	CG44475
FBgn0035522	2.79502	4.2725	7.2627	0.0229284	0.559944	chr3L	4263718	4277778	+	protein_coding	CG1273
FBgn0030359	2.79434	-0.0692507	9.10804	0.00993138	0.51499	chrX	11990117	11992768	-	protein_coding	CG18130
FBgn0035056	2.78591	5.2745	6.33606	0.0310178	0.574257	chr2R	24757377	24760466	+	protein_coding	spz6
FBgn0051313	2.78441	1.38491	9.22163	0.0100964	0.516564	chr3R	14566431	14567429	-	protein_coding	CG31313
FBgn0039805	2.77031	5.03371	30.1108	0.000208428	0.240755	chr3R	30867520	30869184	+	protein_coding	Cpr100A
FBgn0035917	2.75392	0.925882	10.1191	0.00725968	0.490811	chr3L	8624370	8638813	+	protein_coding	Zasp66
FBgn0033520	2.74932	-1.0466	9.23164	0.00954968	0.511228	chr2R	10424435	10425471	+	protein_coding	Prx2540-1
FBgn0035410	2.74123	2.57012	31.1815	9e-05	0.157992	chr3L	3172816	3178580	-	protein_coding	CG14964
FBgn0003089	2.74077	5.33838	6.92654	0.0255252	0.567203	chr3L	19298622	19337609	-	protein_coding	pip
FBgn0085325	2.74057	1.69291	5.78252	0.034782	0.574257	chr3R	29722537	29723013	+	protein_coding	CG34296
FBgn0029681	2.73778	5.13097	6.33676	0.0310105	0.574257	chrX	3884167	3890486	+	protein_coding	CG15239
FBgn0030805	2.7318	4.60184	7.31665	0.0225423	0.556514	chrX	16938243	16940873	-	protein_coding	wus
FBgn0030027	2.72999	5.76903	5.7045	0.0385885	0.588168	chrX	8252669	8272462	+	protein_coding	CG1632
FBgn0033753	2.72305	4.40027	7.0564	0.0244815	0.567203	chr2R	12566184	12569061	+	protein_coding	Cyp301a1
FBgn0034605	2.72238	-0.985838	6.68356	0.0226913	0.556514	chr2R	21215434	21217779	-	protein_coding	CG15661
FBgn0030459	2.71788	0.333356	5.18553	0.0414424	0.590616	chrX	13189642	13191883	-	protein_coding	CG12723
FBgn0003174	2.71624	5.94822	6.90327	0.0257179	0.567203	chr2R	7282571	7300806	+	protein_coding	pwn
FBgn0261832	2.69914	-1.94821	5.21472	0.0399316	0.588168	chr3L	20464713	20466041	-	protein_coding	CG42764
FBgn0032612	2.69406	0.316108	7.3873	0.0176356	0.539558	chr2L	16832064	16834502	-	protein_coding	CG13282
FBgn0029723	2.68623	1.14706	6.33218	0.0272494	0.567203	chrX	4707915	4729487	+	protein_coding	Proc-R
FBgn0014454	2.67918	-0.509448	9.2329	0.00954589	0.511228	chr2L	7740561	7741537	-	protein_coding	Acp1
FBgn0262535	2.67137	-1.85799	4.8197	0.0469754	0.601557	chr3L	3714026	3714717	+	protein_coding	CG43089
FBgn0037164	2.67016	3.31843	6.32098	0.0306449	0.574257	chr3L	22465618	22468076	+	protein_coding	CG11438
FBgn0033807	2.66376	0.0904803	30.2686	0.000103393	0.163312	chr2R	13212404	13214496	-	protein_coding	AQP
FBgn0036924	2.6565	-1.83785	5.60015	0.034234	0.574257	chr3L	19984425	19985868	-	protein_coding	hale
FBgn0044028	2.65257	0.845028	7.1788	0.0192065	0.540667	chr3L	16023479	16032752	+	protein_coding	Notum
FBgn0014033	2.65205	1.02479	12.2024	0.00398843	0.441862	chr2L	4121701	4124153	+	protein_coding	Sr-CI
FBgn0030615	2.64311	1.4185	6.36865	0.0271215	0.567203	chrX	15113301	15116542	-	protein_coding	Cyp4s3
FBgn0262568	2.64281	-1.04373	6.17332	0.0274378	0.568808	chr2R	17257155	17257886	-	protein_coding	CG43108
FBgn0030065	2.64158	6.55426	6.17392	0.0327731	0.574257	chrX	8838322	8872774	+	protein_coding	CG12075
FBgn0262101	2.63928	-1.13092	7.64366	0.0161311	0.535623	chrX	17245352	17247016	-	protein_coding	CG42854
FBgn0039648	2.63643	1.83083	17.7148	0.00103152	0.344605	chr3R	29197555	29199211	+	protein_coding	CG14515
FBgn0267112	2.63598	-1.89688	5.77007	0.0320306	0.574257	chr3R	30528279	30531861	-	lincRNA	CR45552
FBgn0052601	2.62732	-1.86968	4.83442	0.0466878	0.601557	chrX	14378805	14379826	+	protein_coding	betaNACtes3
FBgn0000047	2.62557	6.6629	15.953	0.00240657	0.402447	chr3R	15439968	15442177	+	protein_coding	Act88F
FBgn0032119	2.60974	-1.54809	5.57197	0.0346164	0.574257	chr2L	9435398	9436842	+	protein_coding	CG3769
FBgn0039238	2.60888	-1.15073	6.97425	0.0204202	0.547927	chr3R	24862930	24864216	+	protein_coding	CG7016
FBgn0265342	2.60491	-1.25632	11.1126	0.00541624	0.45607	chr2R	10050347	10050874	+	protein_coding	CG44296
FBgn0019929	2.60175	-0.857678	7.5288	0.0167858	0.535623	chrX	9865232	9867070	+	protein_coding	Ser7
FBgn0263973	2.59878	4.17622	6.69648	0.0275112	0.569318	chr3L	6563196	6589479	-	protein_coding	jv
FBgn0005638	2.59623	2.75937	24.912	0.000267869	0.240755	chr2R	24331521	24334307	-	protein_coding	slbo
FBgn0033867	2.58625	6.84669	5.18283	0.0466164	0.601557	chr2R	13769914	13787802	+	protein_coding	Cpr50Ca
FBgn0039655	2.58286	1.55013	8.01416	0.0151567	0.535623	chr3R	29226203	29227725	-	protein_coding	CG14507
FBgn0031700	2.57837	-0.735125	8.10157	0.0138014	0.532794	chr2L	5327974	5328879	-	protein_coding	CG14022
FBgn0036588	2.57303	-0.434209	10.4291	0.00661552	0.482	chr3L	16269391	16269911	+	protein_coding	CG13068
FBgn0033574	2.57014	2.47872	19.3712	0.00073842	0.29468	chr2R	10938424	10941738	-	protein_coding	Spn47C
FBgn0003513	2.56772	1.23939	7.26205	0.0191193	0.540667	chr3R	16374433	16403690	-	protein_coding	ss
FBgn0036715	2.56499	4.3125	14.3763	0.00338126	0.430518	chr3L	17367752	17379530	-	protein_coding	Cad74A
FBgn0039656	2.55904	-1.00999	6.47855	0.0244721	0.567203	chr3R	29235321	29238704	-	protein_coding	CG11951
FBgn0051871	2.55195	2.03703	14.9269	0.00205943	0.38766	chr2L	10662080	10671487	+	protein_coding	CG31871
FBgn0037936	2.54426	-0.467871	4.68485	0.0497116	0.609009	chr3R	11688380	11690051	-	protein_coding	CG6908
FBgn0000560	2.54357	0.832118	4.73418	0.0499471	0.609009	chr3L	21808702	21817600	+	protein_coding	eg
FBgn0001311	2.54346	7.04446	6.02245	0.034524	0.574257	chr3R	5378092	5392866	-	protein_coding	kkv
FBgn0266990	2.53545	0.835323	6.01156	0.0300495	0.574257	chr3L	6059040	6059448	+	lincRNA	CR45441
FBgn0036590	2.51555	3.69982	7.03437	0.0242604	0.567203	chr3L	16277434	16278180	+	protein_coding	CG13065
FBgn0033821	2.5144	-0.671098	7.27711	0.0183324	0.540429	chr2R	13257885	13258477	+	protein_coding	CG10799
FBgn0032471	2.51313	-0.691393	5.57285	0.0346043	0.574257	chr2L	13130590	13134804	+	protein_coding	CG5122
FBgn0031629	2.50697	4.68423	5.67504	0.038994	0.588168	chr2L	4796599	4801923	-	protein_coding	Clect27
FBgn0050287	2.50474	-0.875567	8.01133	0.0142276	0.532794	chr2R	21536893	21538015	-	protein_coding	CG30287
FBgn0037503	2.49716	-1.08306	12.6478	0.00353445	0.431917	chr3R	7439759	7441976	+	protein_coding	CG14598
FBgn0031869	2.49489	4.17288	16.2793	0.00215085	0.38766	chr2L	6932544	6942814	-	protein_coding	CG18304
FBgn0031528	2.4923	-0.105463	7.84273	0.0150659	0.535623	chr2L	3373566	3375711	-	protein_coding	CG15412
FBgn0034880	2.4862	-0.846409	6.84132	0.0214239	0.553237	chr2R	23556671	23560263	+	protein_coding	ItgalphaPS5
FBgn0051559	2.47867	4.13356	6.32132	0.0311108	0.574257	chr3R	6150115	6157235	-	protein_coding	CG31559
FBgn0036877	2.47792	0.0529787	12.7853	0.00340665	0.430518	chr3L	19501009	19503870	-	protein_coding	CG9452
FBgn0033787	2.47704	-0.278605	6.14859	0.027696	0.569455	chr2R	12953111	12955712	+	protein_coding	CG13321
FBgn0028936	2.47599	-0.718331	14.4826	0.00219943	0.38766	chr2L	13970176	13972173	+	protein_coding	NimB5
FBgn0035755	2.47529	1.34177	7.45586	0.0178575	0.540429	chr3L	7250717	7263920	-	protein_coding	CG14830
[truncated: 603 more rows]

## Sheet: PB_M.R_DES_pv0.05_FC0.5
GeneID	logFC	logCPM	F	PValue	FDR	Chr	start	end	strand	function	name
[truncated: 947 more rows]

## Sheet: PB_R.W_DES_pv0.05_FC0.5
GeneID	logFC	logCPM	F	PValue	FDR	Chr	start	end	strand	function	name
[truncated: 2,177 more rows]

[truncated: 4 more sheets: AB_M.W_pv0.05_FC0.5, AB_M.R_pv0.05_FC0.5, AB_R.W_pv0.05_FC0.5, M.W_M.R_Intersects]
