# Supplementary material
Source: publisher figshare collection journal article supplement (https://gsajournals.figshare.com/articles/dataset/_/24058836)
Supplement: Supplementary file 1 [file 1]

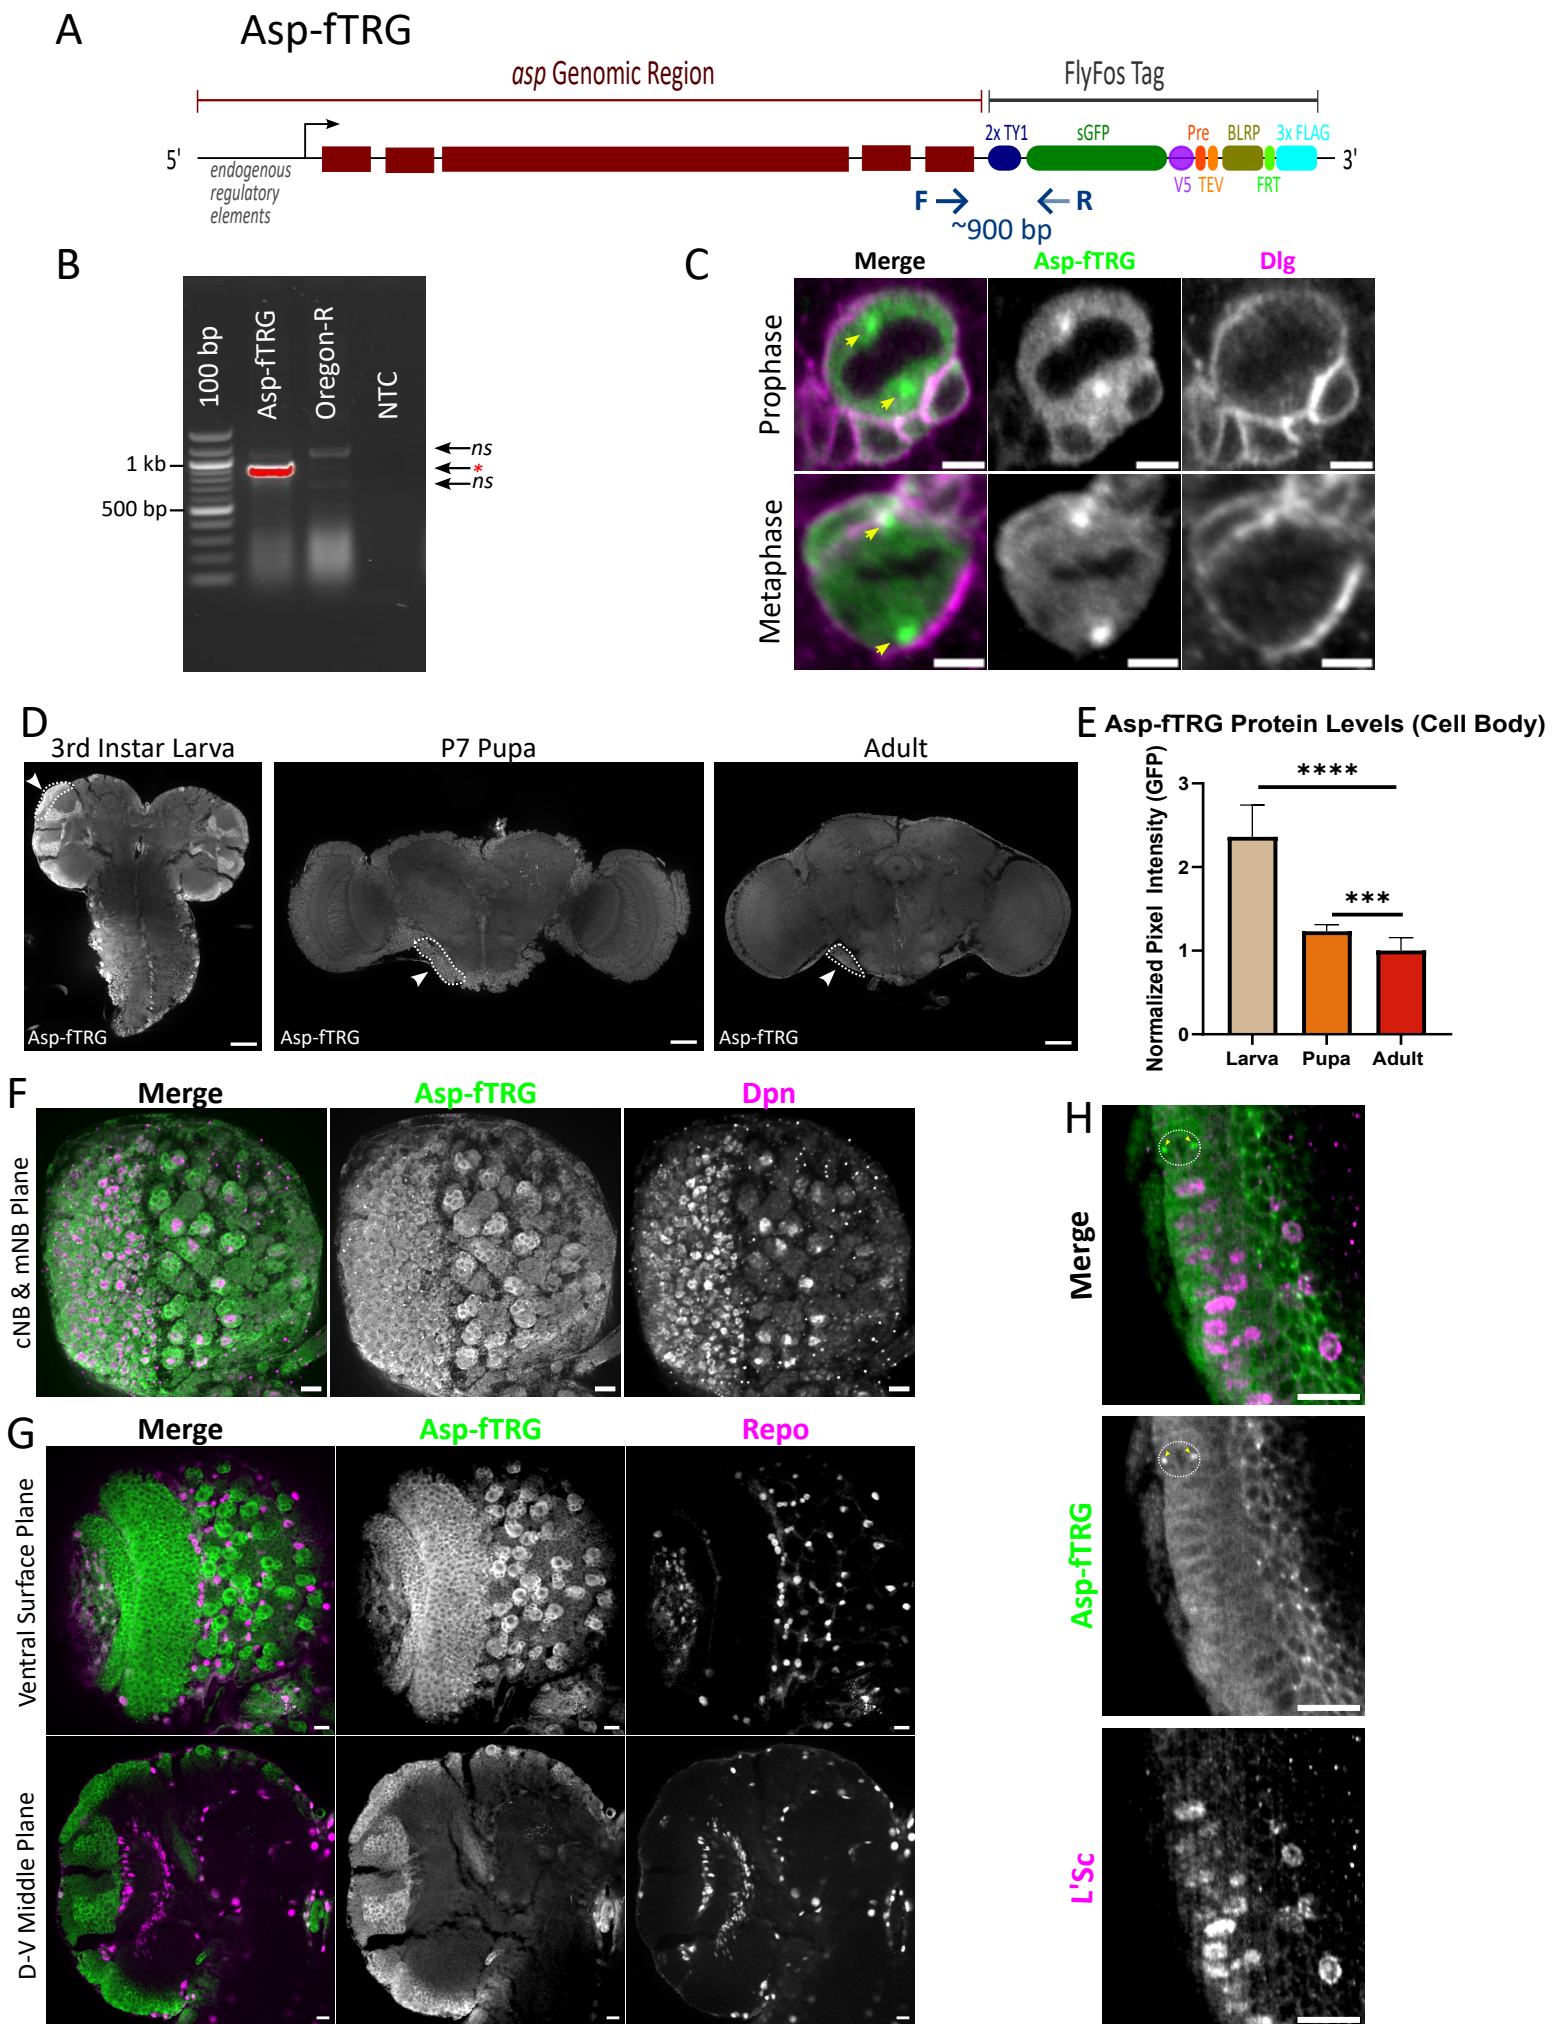

Mannino Supplementary Figure 1

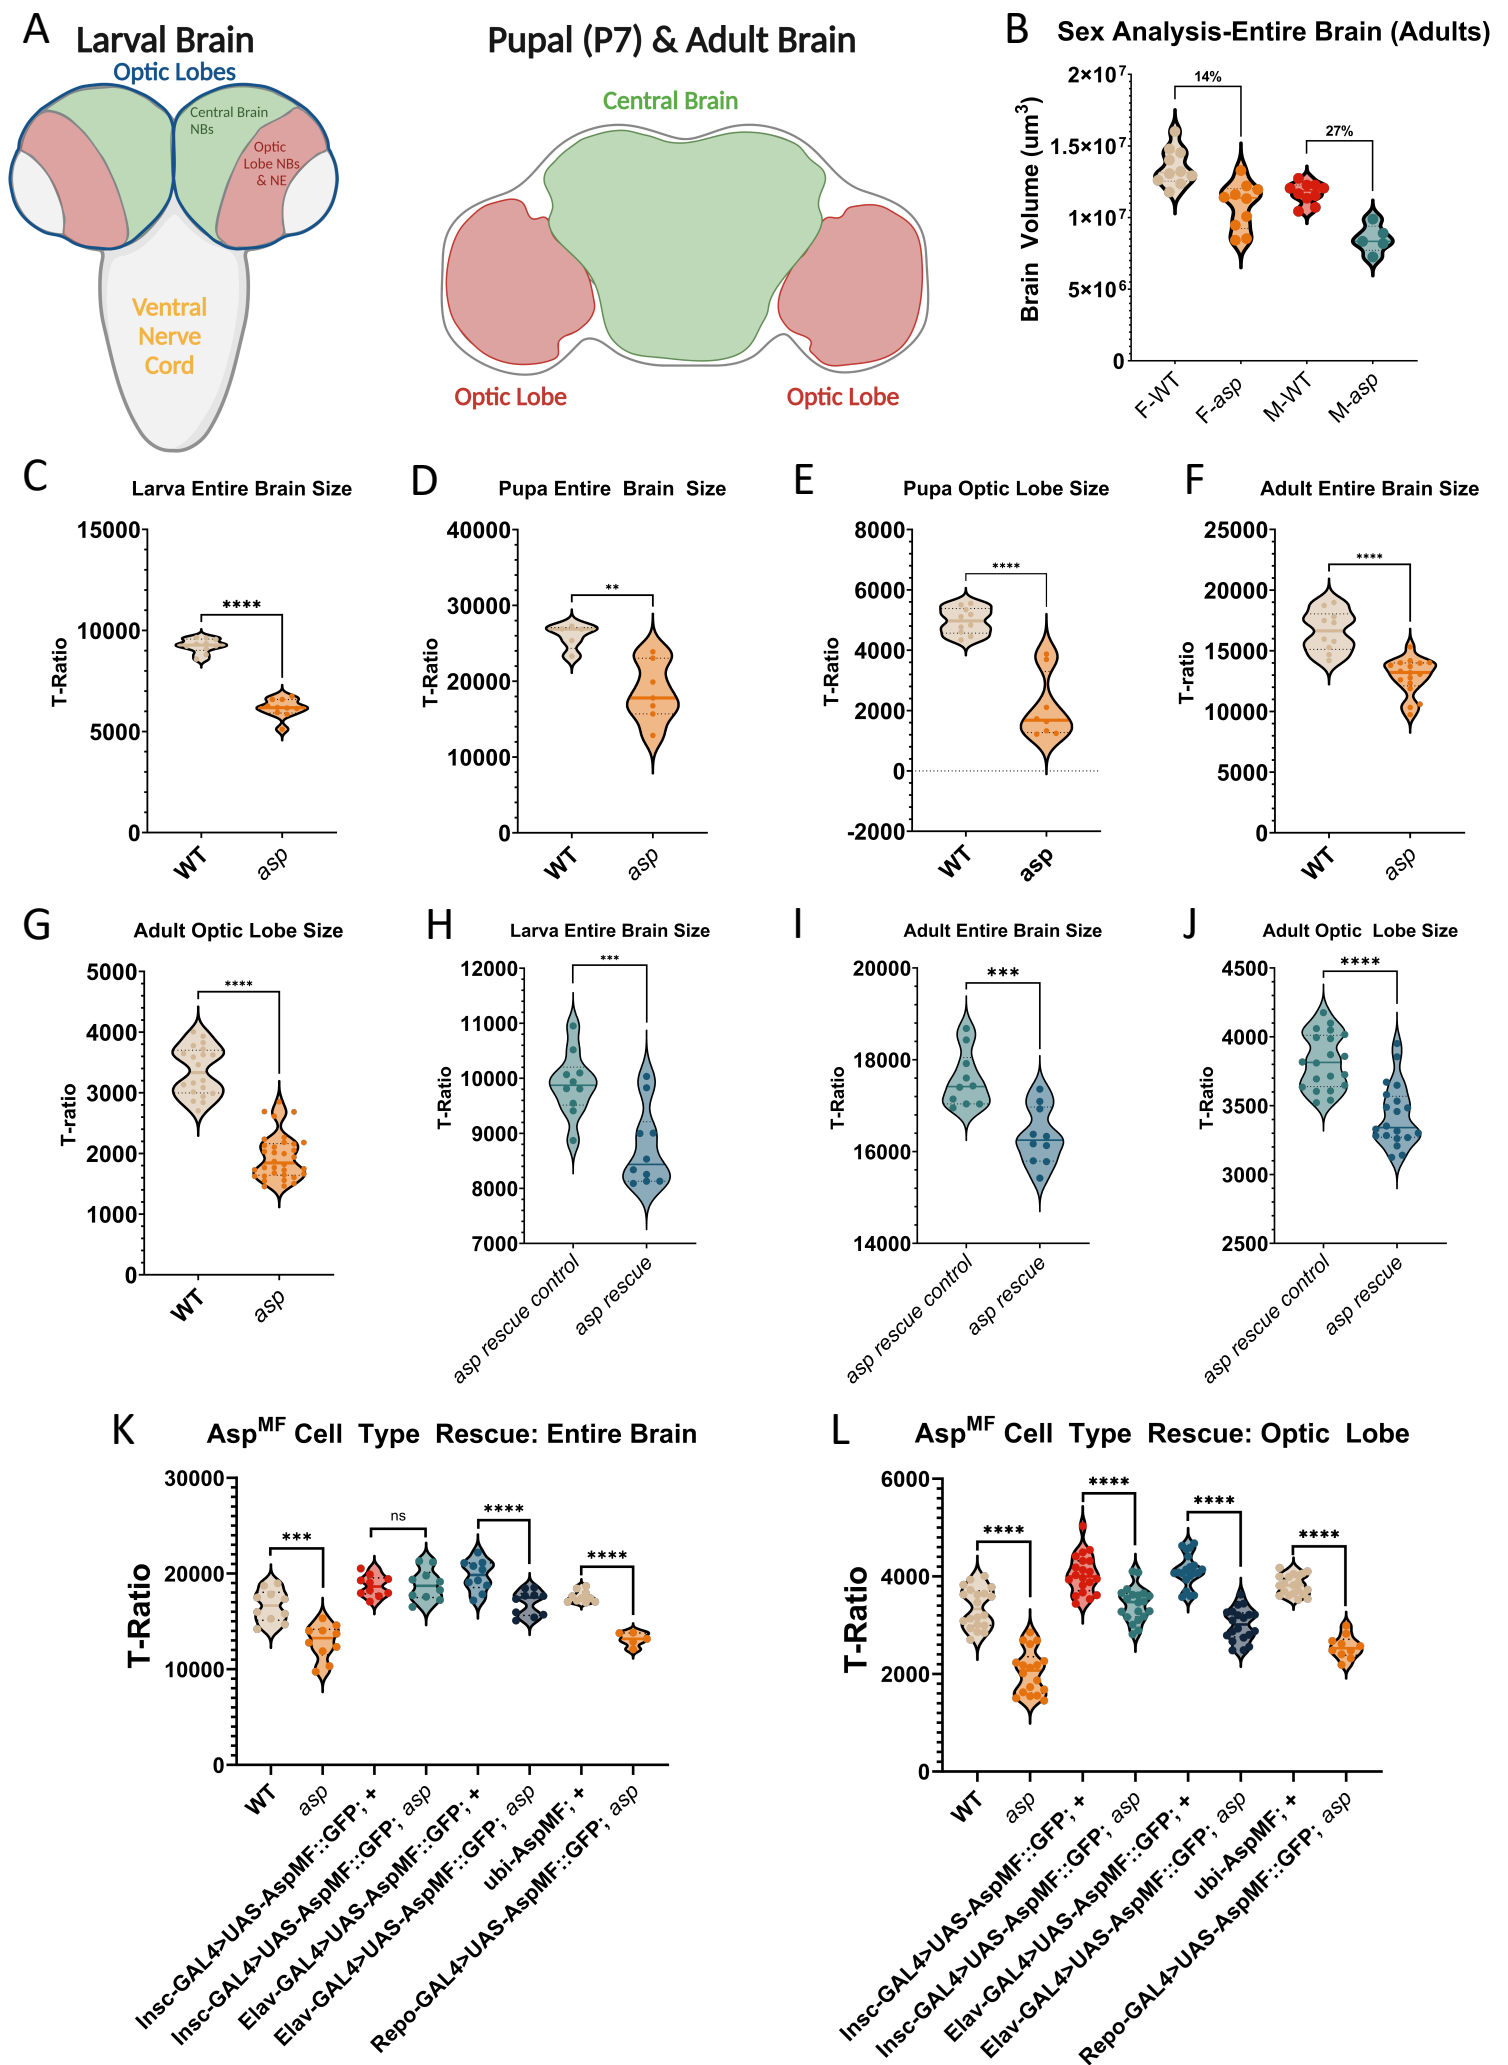

Mannino Supplementary Figure 2



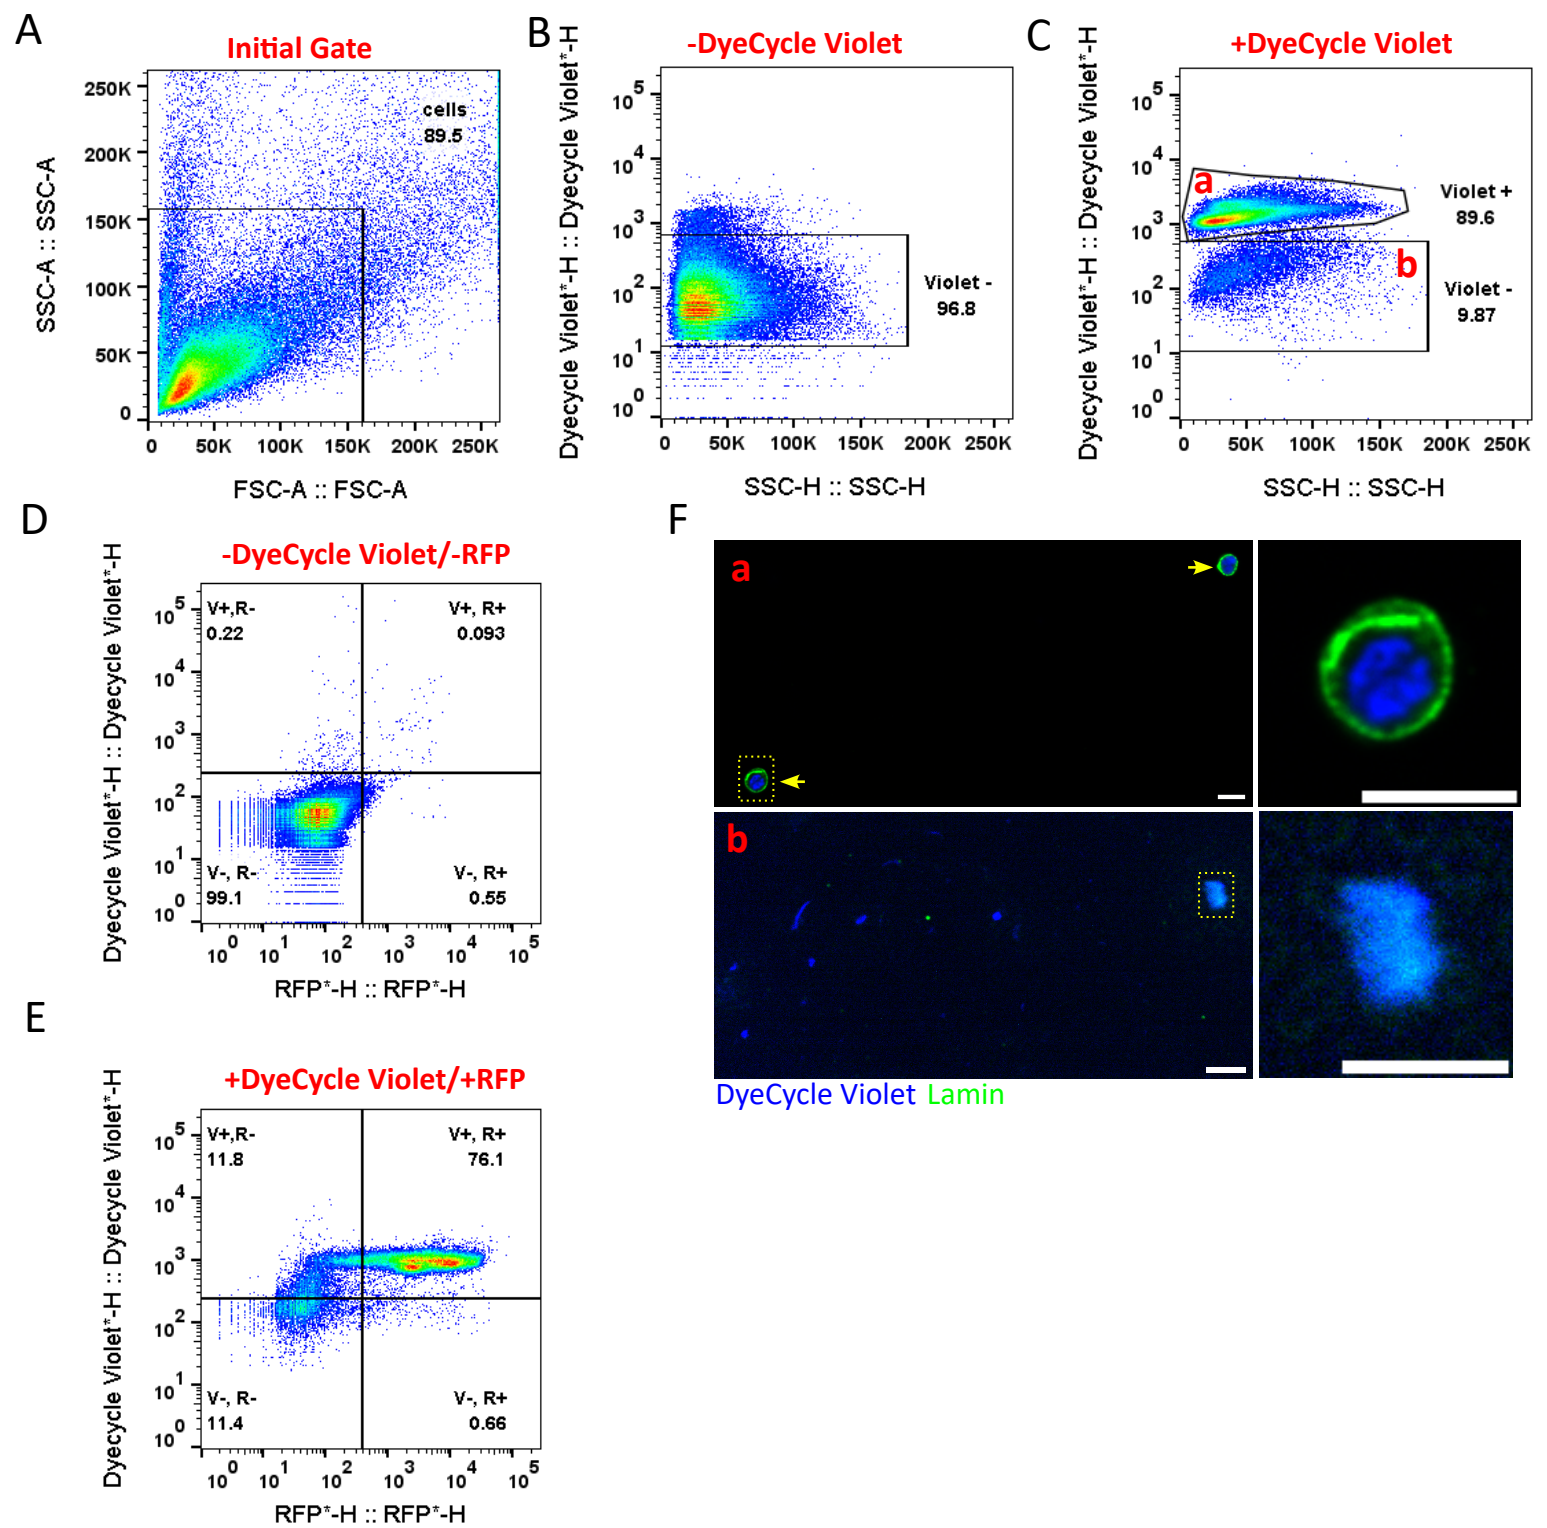

Mannino Supplementary Figure 3

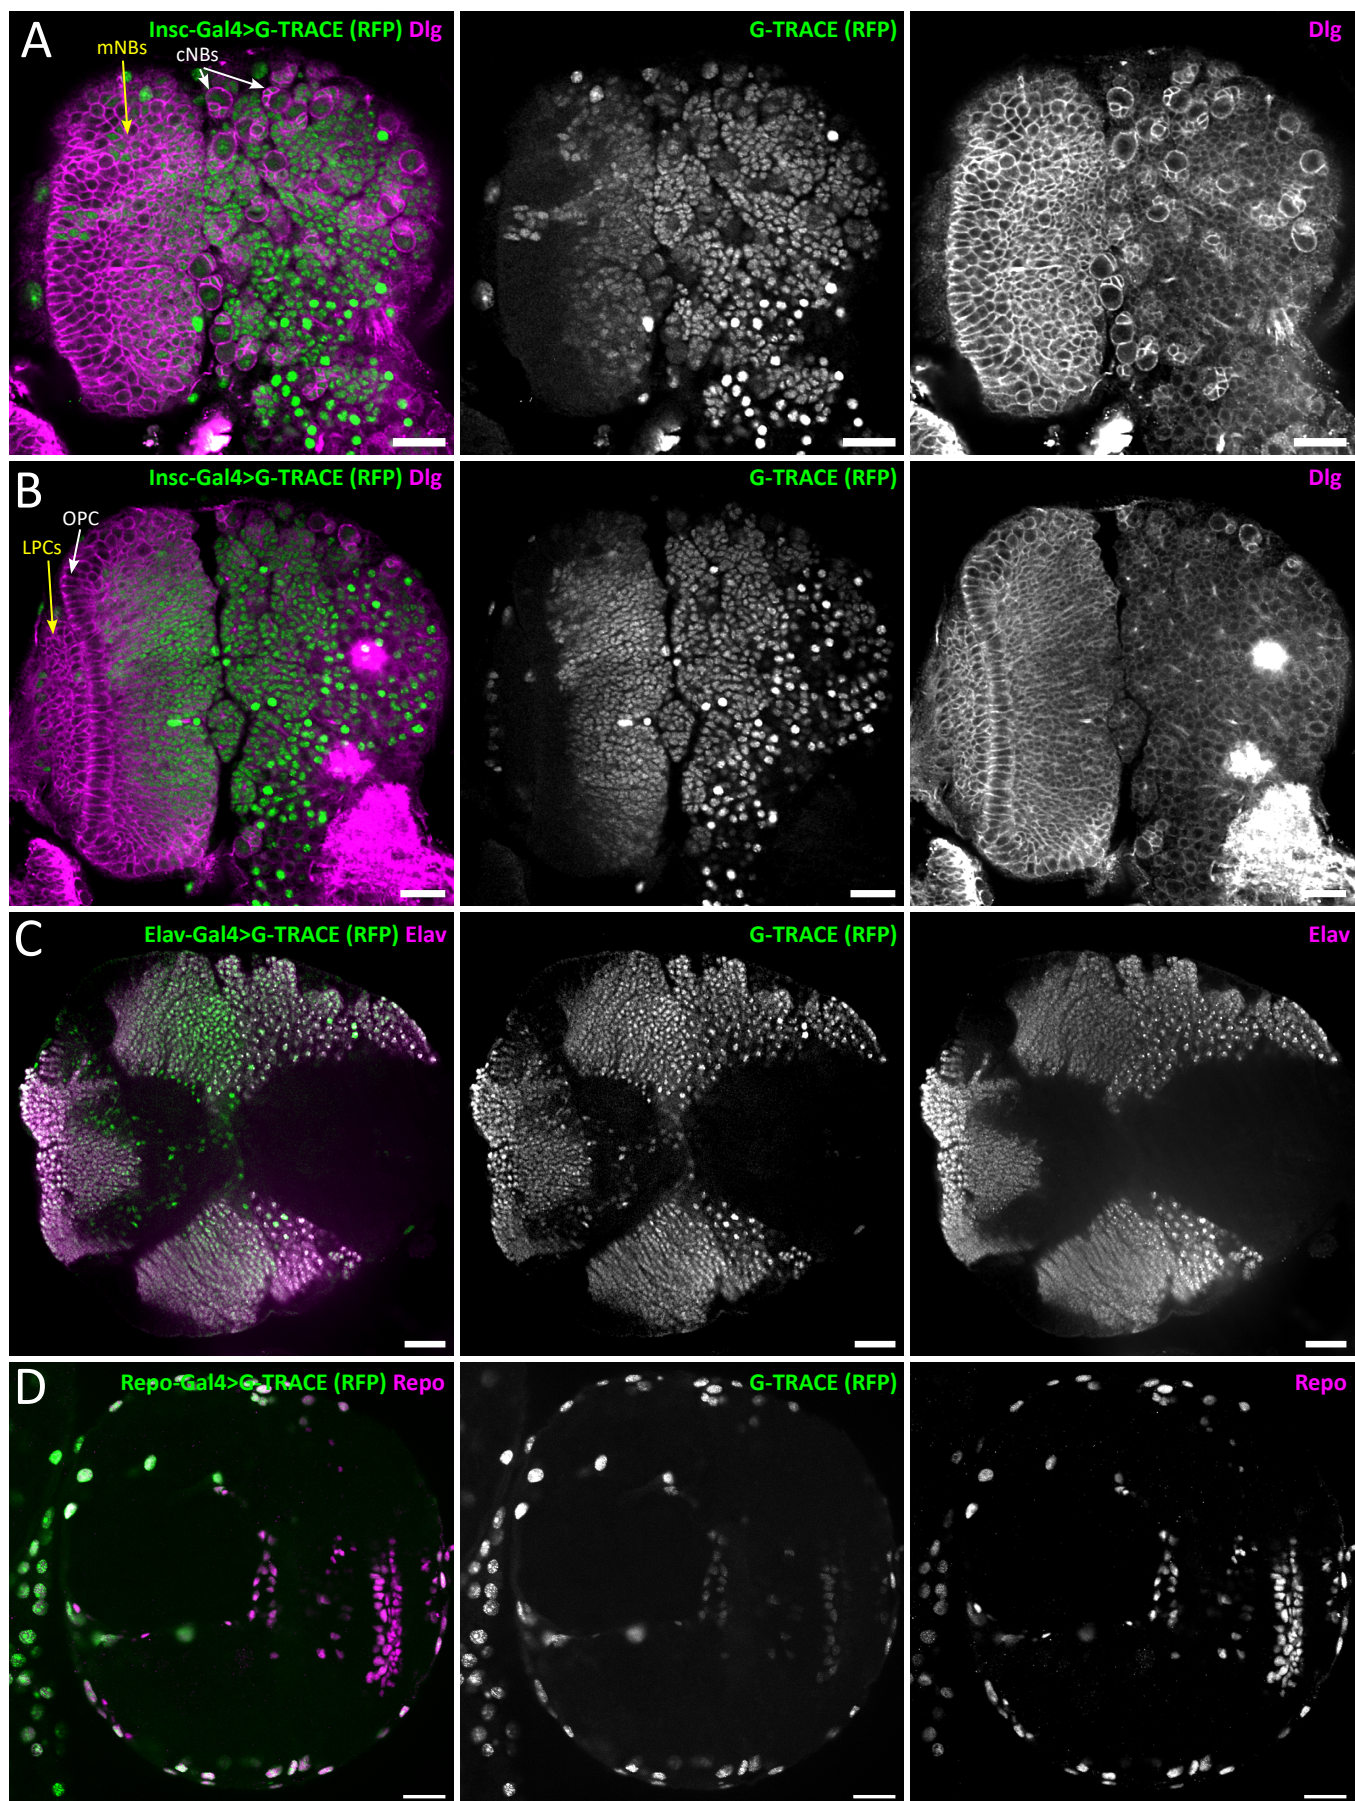

Mannino Supplementary Figure 4



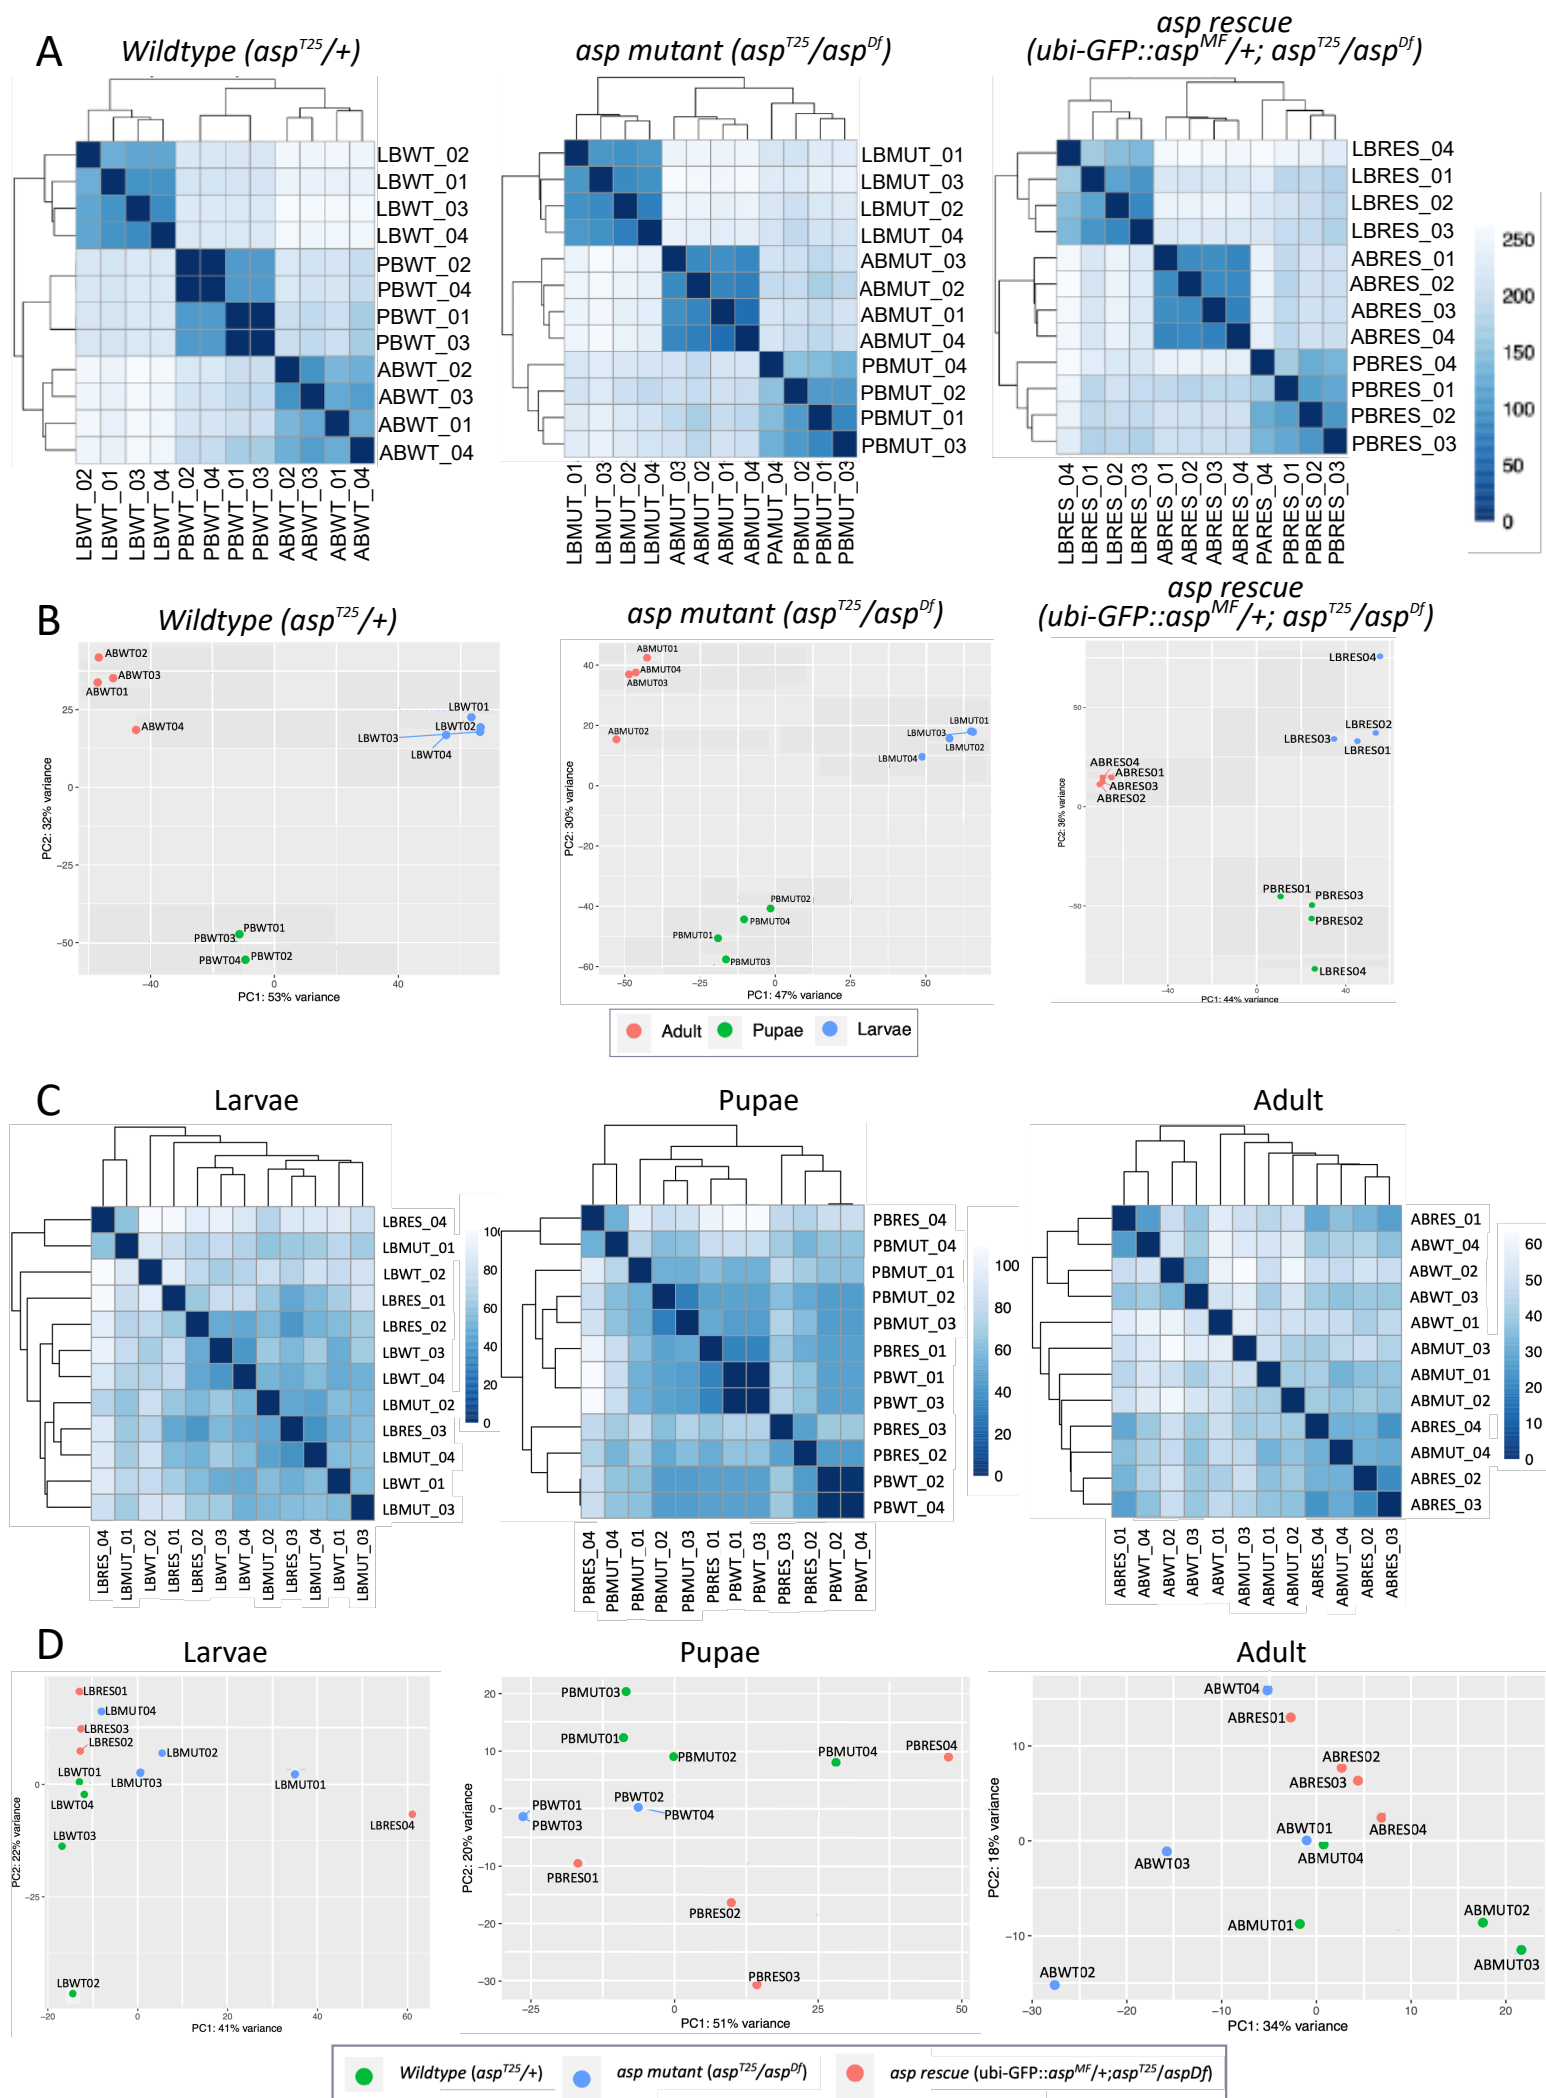

Mannino Supplementary Figure 5



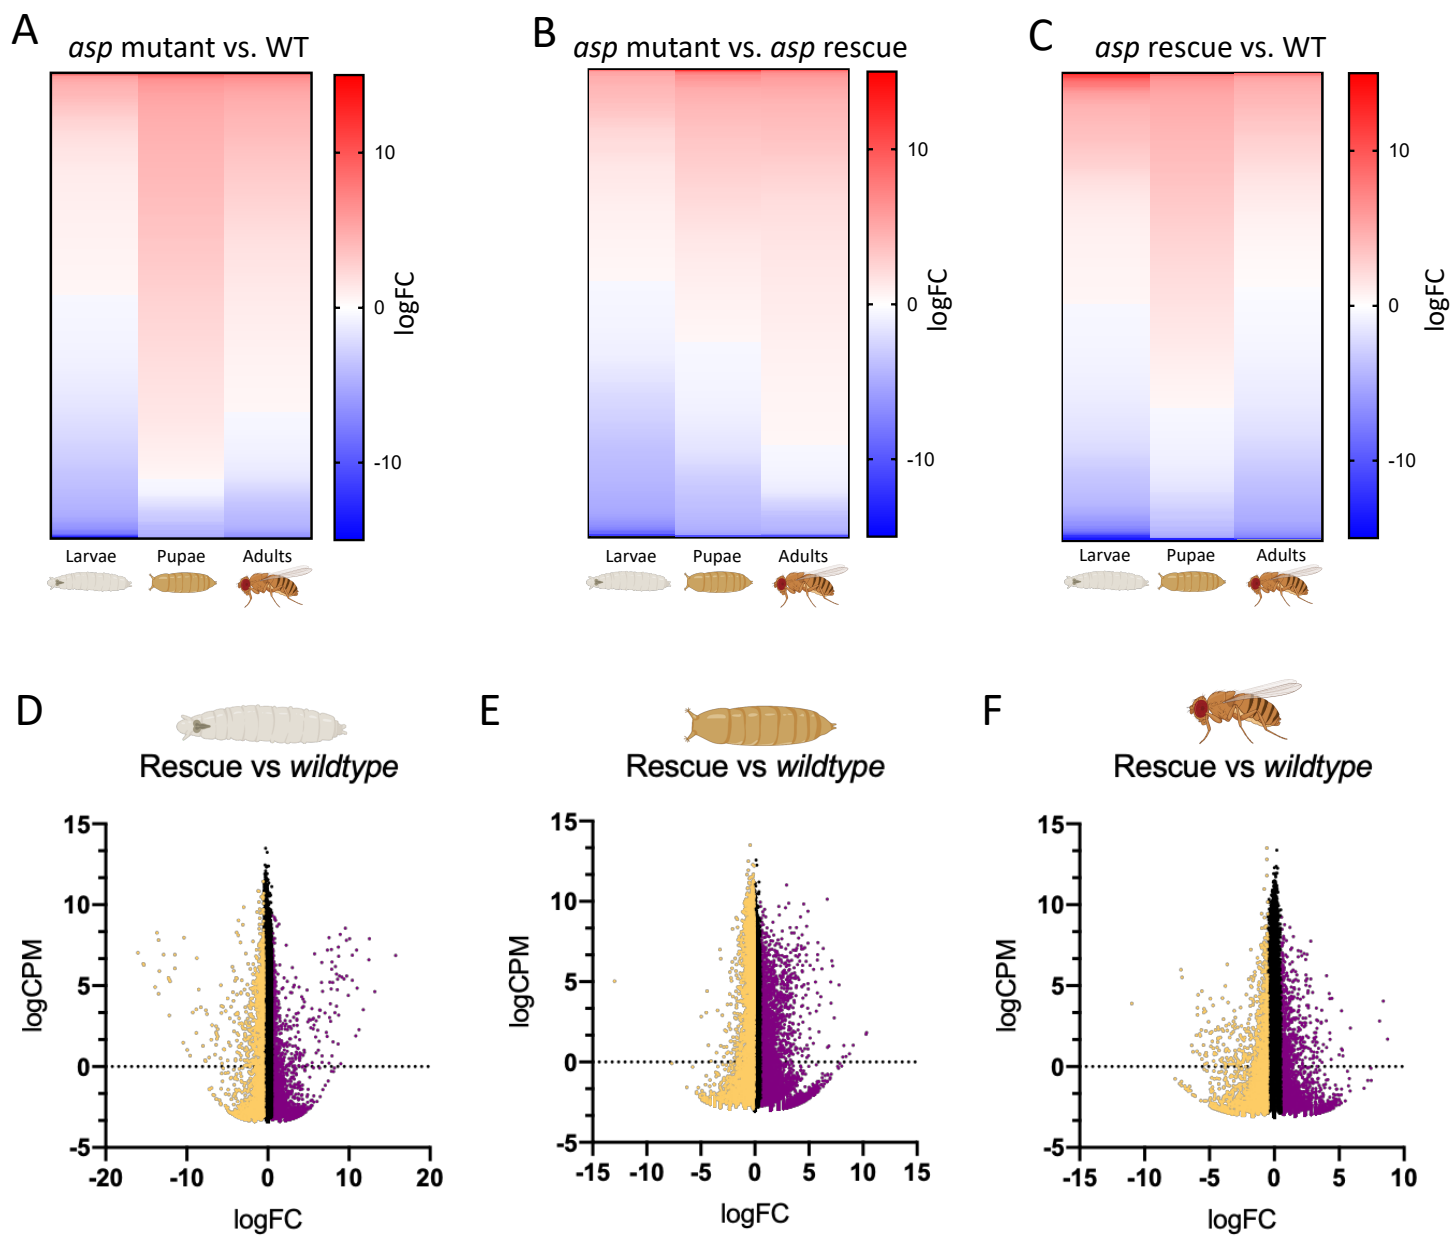

Mannino Supplementary Figure 6



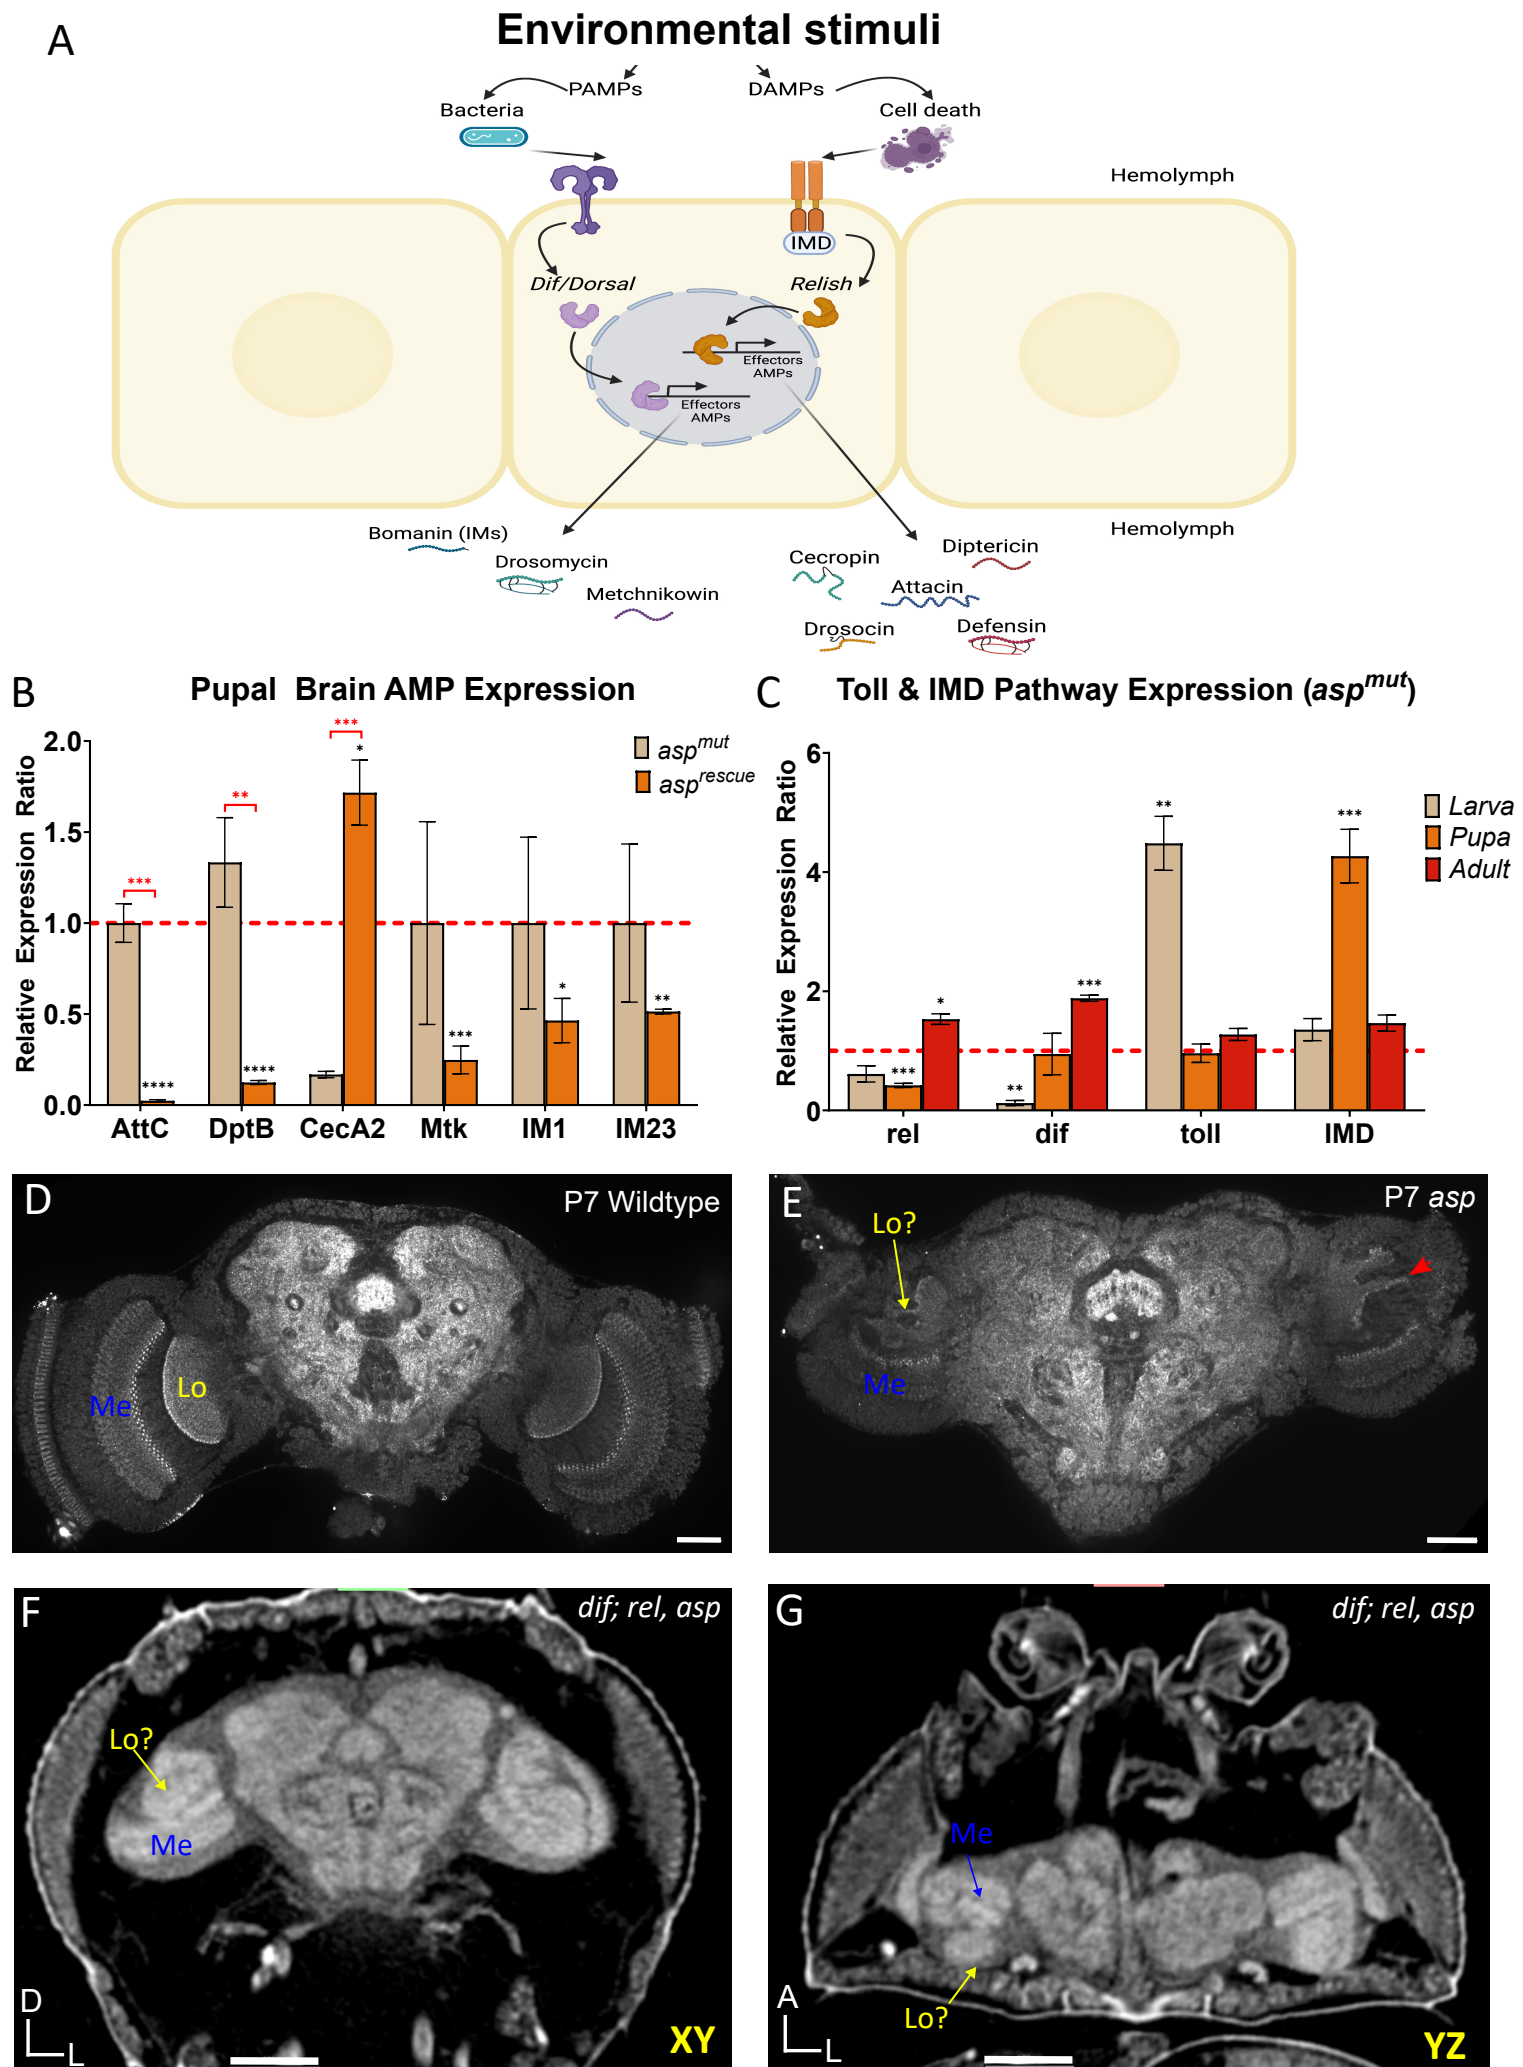

Mannino Supplementary Figure 8



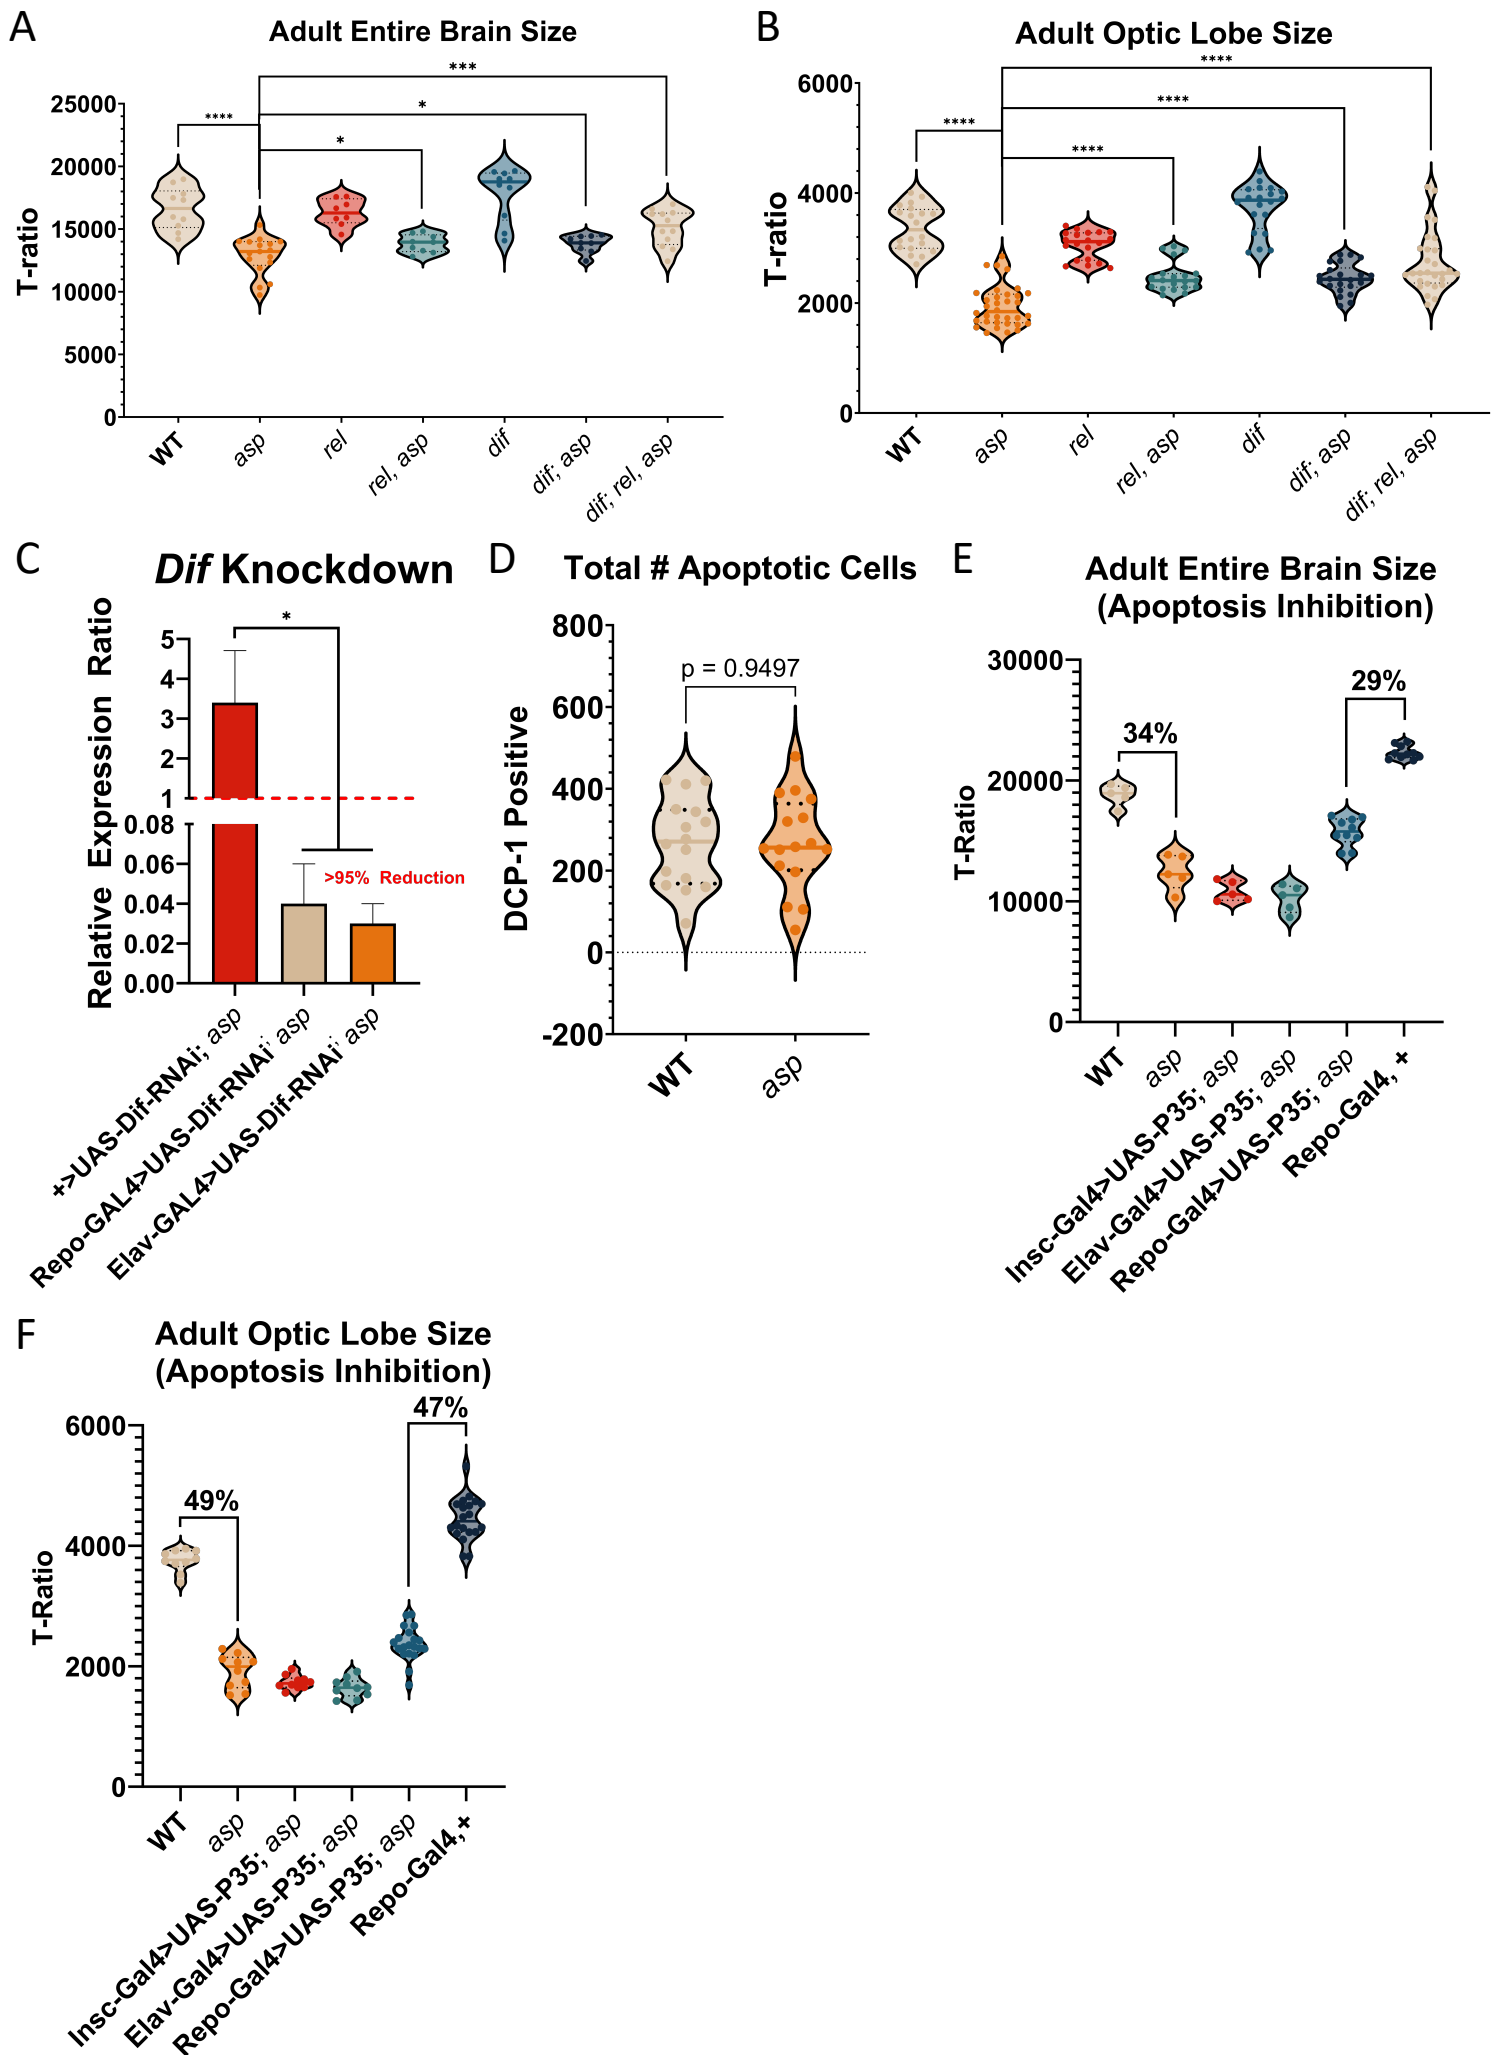

Mannino Supplementary Figure 9
